# Supplementary material for: Cannabis- and Substance-Related Carcinogenesis in Europe: A Lagged Causal Inferential Panel Regression Study
Source: MDPI journal article supplement (doi:10.3390/jox13030024), 2023-07-18
Supplement: s1 [file s1]

## SUPPLEMENTARY TABLES

## Table of Contents

| Supplementary<br>Table Number | Contents                                                                                                   |
|-------------------------------|------------------------------------------------------------------------------------------------------------|
|                               |                                                                                                            |
| S1                            | Cancer Registry Data Sources                                                                               |
| S2                            | Sociodemographic, Drug Exposure and Income Data for Bivariate & Multivariable Studies                      |
| S3                            | Results of Bivariate Mixed Effects Regression Models for Tobacco-Cancer                                    |
| S4                            | Results of Bivariate Mixed Effects Regression Models for Alcohol -Cancer                                   |
| S5                            | Results of Bivariate Linear Regression Models for Last Month Cannabis Use Content-Cancer                   |
| S6                            | Results of Bivariate Mixed Effects Regression Models for Daily Cannabis use-Cancer                         |
| S7                            | Results of Bivariate Linear Regression Models for Cannabis Herb THC Content-Cancer                         |
| S8                            | Results of Bivariate Mixed Effects Regression Models for Amphetamine use-Cancer                            |
| S9                            | Results of Bivariate Mixed Effects Regression Models for Cocaine use-Cancer                                |
| S10                           | Results of Bivariate Linear Regression Models for Cannabis Herb: Daily Use Interaction THC Content-Cancer  |
| S11                           | Results of Bivariate Linear Regression Models for Cannabis Resin: Daily Use Interaction THC Content-Cancer |
| S12                           | Significant Results in Different Bivariate Models After Adjustment for Multiple Testing                    |
| S13                           | Correlation Matrix for Common Cancer - Substance Abuse Associations - Pearson Coefficients                 |
| S14                           | Correlation Matrix for Common Cancer - Substance Abuse Associations - Significance Levels                  |
| S15                           | Correlation Matrix for Common Cancer - Substance Abuse Associations - Numbers of Observations              |
| S16                           | Ranked List of Selected Nations for Tobacco Use                                                            |
| S17                           | Categorical Analysis of High and Low Tobacco Using Nations - Numbers of Cases                              |
| S18                           | Ranked List of Selected Nations for Alcohol Use                                                            |
| S19                           | Categorical Analysis of High and Low Alcohol Using Nations - Numbers of Cases                              |
| S20                           | Categorical Analysis of High and Low Alcohol Using Nations - P, RR, AFE, PAR                               |
| S21                           | Ranked List of Selected Nations for Cannabis Use                                                           |
| S22                           | Categorical Analysis of High and Low Daily Cannabis Using Nations - Numbers of Cases                       |
| S23                           | Full Output from Additive Mixed Effects Model                                                              |
| S24                           | Positive and Significant Terms from Additive Mixed Effects Model                                           |
| S25                           | Summary Table from Positive Significant Terms from Additive Mixed Effects Model                            |
| S26                           | Full Output from Additive Panel Model                                                                      |
| S27                           | Full Output from Interactive Panel Model                                                                   |
| S28                           | Full Output from Interactive Panel Model at Two Lags                                                       |
| S29                           | Positive and Significant Terms from Interactive Panel Model at Two Lags                                    |

|     |                                                                                      |
|-----|--------------------------------------------------------------------------------------|
| S30 | Summary Table from Positive Significant Terms from Interactive Panel Model Two Lags  |
| S31 | Full Output from Interactive Panel Model at Four Lags                                |
| S32 | Positive and Significant Terms from Interactive Panel Model at Four Lags             |
| S33 | Summary Table from Positive Significant Terms from Interactive Panel Model Four Lags |
| S34 | Full Output from Interactive Panel Model at Six Lags                                 |
| S35 | Positive and Significant Terms from Interactive Panel Model at Six Lags              |
| S36 | Summary Table from Positive Significant Terms from Interactive Panel Model Six Lags  |

Supplementary Table S1.: Cancer and Data Sources

| Country   | Data Sources                                                                                                                                                                                                                                                                                                                                                                                                                                                        |
|-----------|---------------------------------------------------------------------------------------------------------------------------------------------------------------------------------------------------------------------------------------------------------------------------------------------------------------------------------------------------------------------------------------------------------------------------------------------------------------------|
|           |                                                                                                                                                                                                                                                                                                                                                                                                                                                                     |
| Austria   | Austrian National Cancer Registry                                                                                                                                                                                                                                                                                                                                                                                                                                   |
| Austria   | <a href="https://www.statistik.at/en/databases/statcube/statcube-statistical-database/login">https://www.statistik.at/en/databases/statcube/statcube-statistical-database/login</a>                                                                                                                                                                                                                                                                                 |
| Belgium   | <a href="https://kankerregister.org/Annual%20Tables">https://kankerregister.org/Annual%20Tables</a>                                                                                                                                                                                                                                                                                                                                                                 |
| Belgium   | Belgian Cancer Registry. <a href="https://kankerregister.org/">https://kankerregister.org/</a>                                                                                                                                                                                                                                                                                                                                                                      |
| Belgium   | Health For All Database. WHO EURO.<br><a href="https://gateway.euro.who.int/en/datasets/european-health-for-all-database/">https://gateway.euro.who.int/en/datasets/european-health-for-all-database/</a>                                                                                                                                                                                                                                                           |
| Belgium   | Cancer burden in Belgium 2004-2017, Belgian Cancer Registry, Brussels 2020.<br><a href="https://kankerregister.org/media/docs/CancerBurdenfeb2020reduced.pdf">https://kankerregister.org/media/docs/CancerBurdenfeb2020reduced.pdf</a>                                                                                                                                                                                                                              |
| Estonia   | <a href="https://statistika.tai.ee/pxweb/en/Andmebaas/Andmebaas__02Haigestumus__04PahaloomulisedKasvajad/?tablelist=true">https://statistika.tai.ee/pxweb/en/Andmebaas/Andmebaas__02Haigestumus__04PahaloomulisedKasvajad/?tablelist=true</a>                                                                                                                                                                                                                       |
| Estonia   | <a href="https://www.ceicdata.com/en/indicator/estonia/annual-household-income-per-capita#:~:text=Estonia%20Household%20Income%20per%20Capita%201%20Estonia%20Annual,an%20averaged%20value%20of%208%2C185.545%20USD.%20More%20items">https://www.ceicdata.com/en/indicator/estonia/annual-household-income-per-capita#:~:text=Estonia%20Household%20Income%20per%20Capita%201%20Estonia%20Annual,an%20averaged%20value%20of%208%2C185.545%20USD.%20More%20items</a> |
| Estonia   | <a href="https://statistika.tai.ee/pxweb/en/Andmebaas/Andmebaas__02Haigestumus__04PahaloomulisedKasvajad/?tablelist=true">https://statistika.tai.ee/pxweb/en/Andmebaas/Andmebaas__02Haigestumus__04PahaloomulisedKasvajad/?tablelist=true</a>                                                                                                                                                                                                                       |
| Europe    | EPIC Centres                                                                                                                                                                                                                                                                                                                                                                                                                                                        |
| Europe    | <a href="https://epic.iarc.fr/centers/iarc.php">https://epic.iarc.fr/centers/iarc.php</a>                                                                                                                                                                                                                                                                                                                                                                           |
| Europe    | European Cancer Information System                                                                                                                                                                                                                                                                                                                                                                                                                                  |
| Europe    | <a href="https://ecis.jrc.ec.europa.eu/">https://ecis.jrc.ec.europa.eu/</a>                                                                                                                                                                                                                                                                                                                                                                                         |
| Europe    | European Network of Cancer Registries                                                                                                                                                                                                                                                                                                                                                                                                                               |
| Europe    | <a href="https://www.enrc.eu/">https://www.enrc.eu/</a>                                                                                                                                                                                                                                                                                                                                                                                                             |
| France    | <a href="https://www.registre-cancers-44-85.fr/donnees-cancers/">https://www.registre-cancers-44-85.fr/donnees-cancers/</a>                                                                                                                                                                                                                                                                                                                                         |
| France    | <a href="https://www.registre-cancers-44-85.fr/donnees-cancers/chiffres-nationaux-et-internationaux/">https://www.registre-cancers-44-85.fr/donnees-cancers/chiffres-nationaux-et-internationaux/</a>                                                                                                                                                                                                                                                               |
| France    | <a href="https://www.registre-cancers-44-85.fr/donnees-cancers/rapports-dincidence/">https://www.registre-cancers-44-85.fr/donnees-cancers/rapports-dincidence/</a>                                                                                                                                                                                                                                                                                                 |
| France    | <a href="https://www.registre-cancers-44-85.fr/wp-content/uploads/2022/02/2021RA-epicv1618.pdf">https://www.registre-cancers-44-85.fr/wp-content/uploads/2022/02/2021RA-epicv1618.pdf</a>                                                                                                                                                                                                                                                                           |
| France    | <a href="https://www.registre-cancers-44-85.fr/wp-content/uploads/2022/02/2021RA-epicla1618.pdf">https://www.registre-cancers-44-85.fr/wp-content/uploads/2022/02/2021RA-epicla1618.pdf</a>                                                                                                                                                                                                                                                                         |
| Germany   | <a href="https://www.krebsdaten.de/Krebs/DE/Datenbankabfrage/datenbankabfrage_stufe1_node.html">https://www.krebsdaten.de/Krebs/DE/Datenbankabfrage/datenbankabfrage_stufe1_node.html</a>                                                                                                                                                                                                                                                                           |
| Germany   | <a href="https://www.krebsdaten.de/Krebs/SiteGlobals/Forms/Datenbankabfrage/EN/datenbankabfrage_stufe2_form.html">https://www.krebsdaten.de/Krebs/SiteGlobals/Forms/Datenbankabfrage/EN/datenbankabfrage_stufe2_form.html</a>                                                                                                                                                                                                                                       |
| Hungary   | <a href="https://stat.nrr.hu/">https://stat.nrr.hu/</a>                                                                                                                                                                                                                                                                                                                                                                                                             |
| Ireland   | Irish National Cancer Registry                                                                                                                                                                                                                                                                                                                                                                                                                                      |
| Latvia    | National Cancer Institute of Latvia - <a href="https://www.nvi.lt/cancer-registry/">https://www.nvi.lt/cancer-registry/</a>                                                                                                                                                                                                                                                                                                                                         |
| Lithuania | <a href="https://www.nvi.lt/naujausi-duomenys/">https://www.nvi.lt/naujausi-duomenys/</a>                                                                                                                                                                                                                                                                                                                                                                           |



|             |                                                                                                                                                                                                                                                                                                                                                                                                   |
|-------------|---------------------------------------------------------------------------------------------------------------------------------------------------------------------------------------------------------------------------------------------------------------------------------------------------------------------------------------------------------------------------------------------------|
| Netherlands | <a href="https://iknl.nl/en">https://iknl.nl/en</a>                                                                                                                                                                                                                                                                                                                                               |
| Nordcan     | <a href="https://nordcan.iarc.fr/en/dataviz/trends?cancers=520&amp;sexes=1_2&amp;populations=246_208_578_752_352&amp;mode=population&amp;multiple_populations=1&amp;multiple_cancers=0&amp;key=asr">https://nordcan.iarc.fr/en/dataviz/trends?cancers=520&amp;sexes=1_2&amp;populations=246_208_578_752_352&amp;mode=population&amp;multiple_populations=1&amp;multiple_cancers=0&amp;key=asr</a> |
| Nordcan     | Finland, Denmark, Norway, Sweden, Iceland                                                                                                                                                                                                                                                                                                                                                         |
| Poland      | <a href="https://onkologia.org.pl/pl/raporty">https://onkologia.org.pl/pl/raporty</a>                                                                                                                                                                                                                                                                                                             |
| Portugal    | <a href="https://ron.min-saude.pt/pt/PesquisaSearch.aspx?q=contact">https://ron.min-saude.pt/pt/PesquisaSearch.aspx?q=contact</a>                                                                                                                                                                                                                                                                 |
| Spain       | <a href="https://seom.org/images/Las_cifras_del_Cancer_en_Espana_2023.pdf">https://seom.org/images/Las_cifras_del_Cancer_en_Espana_2023.pdf</a>                                                                                                                                                                                                                                                   |
| Spain       | Sociedad Española de Oncología Médica                                                                                                                                                                                                                                                                                                                                                             |
| Spain       | <a href="https://www.encl.eu/">https://www.encl.eu/</a>                                                                                                                                                                                                                                                                                                                                           |
| Spain       | REDECAN: Red española de registros de cáncer. Estimaciones de la incidencia del cáncer en España, 2020.                                                                                                                                                                                                                                                                                           |
| Spain       | <a href="https://redecn.org/storage/documents/c1e2997b-c0f2-4cdc-bb4a-b09662b6e009.pdf">https://redecn.org/storage/documents/c1e2997b-c0f2-4cdc-bb4a-b09662b6e009.pdf</a>                                                                                                                                                                                                                         |
| Spain       | ESTIMACIONES DE LA INCIDENCIA DEL CÁNCER EN ESPAÑA, 2019                                                                                                                                                                                                                                                                                                                                          |
| Spain       | <a href="https://redecn.org/storage/documents/a1d352cb-5f15-49e9-99ef-07725d639aee.pdf">https://redecn.org/storage/documents/a1d352cb-5f15-49e9-99ef-07725d639aee.pdf</a>                                                                                                                                                                                                                         |
| Spain       | <a href="https://redecn.org/en">https://redecn.org/en</a>                                                                                                                                                                                                                                                                                                                                         |
| Spain       | Registro Oncológico Nacional, RON                                                                                                                                                                                                                                                                                                                                                                 |
| Spain       | <a href="https://redecn.org/en/online-statistics">https://redecn.org/en/online-statistics</a>                                                                                                                                                                                                                                                                                                     |
| Spain       | <a href="https://www.isciii.es/QuienesSomos/CentrosPropios/CNE/EpidemiologiaCancerAmbiental/Paginas/Publicaciones.aspx">https://www.isciii.es/QuienesSomos/CentrosPropios/CNE/EpidemiologiaCancerAmbiental/Paginas/Publicaciones.aspx</a>                                                                                                                                                         |
| Spain       | <a href="https://www.europecancer.org/">https://www.europecancer.org/</a>                                                                                                                                                                                                                                                                                                                         |
| Spain       | <a href="https://redecn.org/en/links">https://redecn.org/en/links</a>                                                                                                                                                                                                                                                                                                                             |
| Spain       | <a href="https://www.jto.org/article/S1556-0864(20)30812-1/fulltext">https://www.jto.org/article/S1556-0864(20)30812-1/fulltext</a>                                                                                                                                                                                                                                                               |
| Spain       | <a href="https://www.sanidad.gob.es/en/estadEstudios/portada/home.htm">https://www.sanidad.gob.es/en/estadEstudios/portada/home.htm</a>                                                                                                                                                                                                                                                           |
| Spain       | Also wrote to all 18 Spanish registries individually                                                                                                                                                                                                                                                                                                                                              |
| Spain       | <a href="https://redecn.org/en/cancer-registries">https://redecn.org/en/cancer-registries</a>                                                                                                                                                                                                                                                                                                     |
| Spain       | <a href="https://redecn.org/production/current/public/es/registros-de-cancer">https://redecn.org/production/current/public/es/registros-de-cancer</a>                                                                                                                                                                                                                                             |
| Spain       | Las cifras del Cancer en Espana 2023.pdf (seom.org)                                                                                                                                                                                                                                                                                                                                               |
| Spain       | <a href="https://seom.org/images/Las_cifras_del_Cancer_en_Espana_2023.pdf">https://seom.org/images/Las_cifras_del_Cancer_en_Espana_2023.pdf</a>                                                                                                                                                                                                                                                   |
| Spain       | <a href="https://www.populationof.net/spain/">https://www.populationof.net/spain/</a>                                                                                                                                                                                                                                                                                                             |
| Spain       | <a href="https://www.multip.com/spain-population/table/by-year">https://www.multip.com/spain-population/table/by-year</a>                                                                                                                                                                                                                                                                         |
| Switzerland | <a href="https://www.nacr.ch/en/statistics-atlas/national-statistics-on-cancer-incidence/">https://www.nacr.ch/en/statistics-atlas/national-statistics-on-cancer-incidence/</a>                                                                                                                                                                                                                   |
| Switzerland | <a href="https://view.officeapps.live.com/op/view.aspx?src=https%3A%2F%2Fwww.nacr.ch%2Fassets%2Ffiles%2Fuploads%2F5ye-inc-ch-sl-sa-198084-201519-website-en.xlsx&amp;wdOrigin=BROWSELINK">https://view.officeapps.live.com/op/view.aspx?src=https%3A%2F%2Fwww.nacr.ch%2Fassets%2Ffiles%2Fuploads%2F5ye-inc-ch-sl-sa-198084-201519-website-en.xlsx&amp;wdOrigin=BROWSELINK</a>                     |
| Switzerland | <a href="https://www.pxweb.bfs.admin.ch/pxweb/en/px-x-1403030300_162/px-x-1403030300_162/px-x-1403030300_162.px/table/tableViewLayout2/">https://www.pxweb.bfs.admin.ch/pxweb/en/px-x-1403030300_162/px-x-1403030300_162/px-x-1403030300_162.px/table/tableViewLayout2/</a>                                                                                                                       |
| UK          | <a href="https://www.cancerdata.nhs.uk/incidence_and_mortality">https://www.cancerdata.nhs.uk/incidence_and_mortality</a>                                                                                                                                                                                                                                                                         |
| UK          | <a href="https://digital.nhs.uk/data-and-information/publications/statistical/cancer-registration-statistics/england-2020">https://digital.nhs.uk/data-and-information/publications/statistical/cancer-registration-statistics/england-2020</a>                                                                                                                                                   |
|             |                                                                                                                                                                                                                                                                                                                                                                                                   |
|             |                                                                                                                                                                                                                                                                                                                                                                                                   |

|         |                                                                                                                                                                                                                                                                                                                                                             |
|---------|-------------------------------------------------------------------------------------------------------------------------------------------------------------------------------------------------------------------------------------------------------------------------------------------------------------------------------------------------------------|
| Alcohol | <a href="https://www.who.int/data/gho/data/indicators/indicator-details/GHO/total-(recorded-unrecorded)-alcohol-per-capita-(15-)-consumption">https://www.who.int/data/gho/data/indicators/indicator-details/GHO/total-(recorded-unrecorded)-alcohol-per-capita-(15-)-consumption</a>                                                                       |
| Tobacco | <a href="https://www.who.int/data/gho/data/indicators/indicator-details/GHO/gho-tobacco-control-monitor-current-tobaccouse-tobaccosmoking-cigarettesmoking-agestd-tobagestdcurr">https://www.who.int/data/gho/data/indicators/indicator-details/GHO/gho-tobacco-control-monitor-current-tobaccouse-tobaccosmoking-cigarettesmoking-agestd-tobagestdcurr</a> |

Supplementary Table S2.: Sociodemographic, Income and Drug Use Data  
for whole Study Group for Both  
Bivariate and Multivariate Studies

| Measure                                          | Bivariate    | Multivariate |
|--------------------------------------------------|--------------|--------------|
| Sample Size                                      | 47,920       | 42,675       |
| Country (%)                                      |              |              |
| Austria                                          | 354 ( 0.7)   | 314 ( 0.7)   |
| Belgium                                          | 2910 ( 6.1)  | 2451 ( 5.7)  |
| Bulgaria                                         | 380 ( 0.8)   | 337 ( 0.8)   |
| Czechia                                          | 380 ( 0.8)   | 337 ( 0.8)   |
| Denmark                                          | 600 ( 1.3)   | 520 ( 1.2)   |
| Estonia                                          | 7560 (15.8)  | 7182 (16.8)  |
| Finland                                          | 630 ( 1.3)   | 546 ( 1.3)   |
| France                                           | 6134 (12.8)  | 5550 (13.0)  |
| Germany                                          | 3704 ( 7.7)  | 3266 ( 7.7)  |
| Hungary                                          | 30 ( 0.1)    | 26 ( 0.1)    |
| Iceland                                          | 1006 ( 2.1)  | 880 ( 2.1)   |
| Ireland                                          | 1757 ( 3.7)  | 1462 ( 3.4)  |
| Italy                                            | 11086 (23.1) | 9852 (23.1)  |
| Latvia                                           | 600 ( 1.3)   | 560 ( 1.3)   |
| Lithuania                                        | 130 ( 0.3)   | 120 ( 0.3)   |
| Luxembourg                                       | 30 ( 0.1)    |              |
| Netherlands                                      | 980 ( 2.0)   | 811 ( 1.9)   |
| Norway                                           | 980 ( 2.0)   | 857 ( 2.0)   |
| Poland                                           | 1036 ( 2.2)  | 893 ( 2.1)   |
| Portugal                                         | 1002 ( 2.1)  | 890 ( 2.1)   |
| Romania                                          | 273 ( 0.6)   | 242 ( 0.6)   |
| Spain                                            | 3624 ( 7.6)  | 3206 ( 7.5)  |
| Sweden                                           | 630 ( 1.3)   | 546 ( 1.3)   |
| United Kingdom                                   | 2104 ( 4.4)  | 1827 ( 4.3)  |
| Cancer (%) (ICD10 Codes)                         |              |              |
| All Cancers (C00-C99)                            | 757 ( 1.6)   | 756 ( 1.8)   |
| All Cancers nNMSC, (C00-C99 Excluding C44)       | 1524 ( 3.2)  | 1522 ( 3.6)  |
| Anus (C21)                                       | 1429 ( 3.0)  | 1427 ( 3.3)  |
| Bladder (C67)                                    | 1817 ( 3.8)  | 1814 ( 4.3)  |
| Brain (C71)                                      | 1791 ( 3.7)  | 1788 ( 4.2)  |
| Breast (C50)                                     | 1878 ( 3.9)  | 1757 ( 4.1)  |
| Cervix (C53)                                     | 1791 ( 3.7)  | 1788 ( 4.2)  |
| Colorectum (C18-C20)                             | 1812 ( 3.8)  | 1808 ( 4.2)  |
| Corpus Uteri (C54)                               | 1904 ( 4.0)  | 1901 ( 4.5)  |
| Gallbladder & Biliary (C23)                      | 1216 ( 2.5)  | 1213 ( 2.8)  |
| Hepatocellular, (C22; ICDO 3.2: 9170/3 - 8715/3) | 62 ( 0.1)    |              |

|                                                                |                    |                    |
|----------------------------------------------------------------|--------------------|--------------------|
| Hodgkins (C81)                                                 | 1458 ( 3.0)        | 1455 ( 3.4)        |
| Kaposi (C46)                                                   | 151 ( 0.3)         | 151 ( 0.4)         |
| Kidney (C64)                                                   | 1817 ( 3.8)        | 1814 ( 4.3)        |
| Larynx (C32)                                                   | 1797 ( 3.8)        | 1794 ( 4.2)        |
| Leukaemia (C91-C95)                                            | 1692 ( 3.5)        |                    |
| Leukaemia - Lymphoid (C91)                                     | 373 ( 0.8)         | 373 ( 0.9)         |
| Leukaemia - Myeloid (92)                                       | 394 ( 0.8)         | 394 ( 0.9)         |
| Liver & Intrahepatic ducts (C22)                               | 1420 ( 3.0)        | 1417 ( 3.3)        |
| Lung (C34)                                                     | 1774 ( 3.7)        | 1771 ( 4.1)        |
| Medulloblastoma (C716, CIDO 9470/3 - 9472/3 & 9474/3 - 9477/3) | 16 ( 0.0)          |                    |
| Melanoma (C43)                                                 | 1798 ( 3.8)        | 1795 ( 4.2)        |
| Mesothelioma (C45)                                             | 172 ( 0.4)         |                    |
| Myeloma (C90)                                                  | 1438 ( 3.0)        | 1435 ( 3.4)        |
| Non-Hodgkins lymphoma (C82-C86)                                | 1735 ( 3.6)        | 1732 ( 4.1)        |
| Non-Seminoma (C62, ICDO 3.2 9065/3)                            | 38 ( 0.1)          |                    |
| Oesophagus (C15)                                               | 1817 ( 3.8)        | 1814 ( 4.3)        |
| Oropharynx (C10)                                               | 400 ( 0.8)         | 399 ( 0.9)         |
| Oropharynx_Broad (C00-C14)                                     | 485 ( 1.0)         | 504 ( 1.2)         |
| Ovarian Dysgerminoma (C56, ICDO 3.2 9060/3)                    | 17 ( 0.0)          |                    |
| Ovary (C56)                                                    | 1791 ( 3.7)        | 1788 ( 4.2)        |
| Pancreas (C25)                                                 | 1817 ( 3.8)        | 1814 ( 4.3)        |
| Penis (C60)                                                    | 1346 ( 2.8)        |                    |
| Prostate (C61)                                                 | 1794 ( 3.7)        | 1791 ( 4.2)        |
| Seminoma (C62, ICDO 3.2 9061/3 - 9063/3)                       | 39 ( 0.1)          |                    |
| Stomach (C16)                                                  | 1817 ( 3.8)        | 1814 ( 4.3)        |
| Testis (C62)                                                   | 1413 ( 2.9)        | 1410 ( 3.3)        |
| Thyroid (C73)                                                  | 1439 ( 3.0)        | 1436 ( 3.4)        |
| Vagina (C52)                                                   | 229 ( 0.5)         |                    |
| Vulva (C51)                                                    | 234 ( 0.5)         |                    |
| Vulva & Vagina (C51-C52)                                       | 1228 ( 2.6)        |                    |
|                                                                |                    |                    |
| ASRw (median [IQR])                                            | 7.90 [3.50, 19.34] | 8.60 [4.30, 23.44] |
| Group, N (%)                                                   |                    |                    |
| High                                                           | 39737 (82.9%)      | 35527 (83.3%)      |
| Low                                                            | 8183 (17.1%)       | 7148 (16.7%)       |
|                                                                |                    |                    |
| Substances                                                     |                    |                    |
| Tobacco (% Using) (mean (SD))                                  | 29.34 (6.52)       | 29.54 (6.55)       |
| Tobacco Interpolated (mean (SD))                               | 30.37 (6.05)       | 30.50 (6.08)       |
| Alcohol Consumption (L/Yr) (mean (SD))                         | 11.14 (2.46)       | 11.17 (2.47)       |
| Alcohol Interpolated (mean (SD))                               | 11.27 (2.28)       | 11.29 (2.29)       |
| Last Month Cannabis Use (mean (SD))                            | 0.04 (0.01)        | 0.04 (0.01)        |
| Last Month Cannabis Interpolated (mean (SD))                   | 0.03 (0.02)        | 0.03 (0.02)        |
| Daily Cannabis Use (mean (SD))                                 | 0.01 (0.01)        | 0.01 (0.01)        |
| Daily Cannabis Use Interpolated (mean (SD))                    | 0.00 (0.01)        | 0.00 (0.00)        |
| THC Content Cannabis Resin (mean (SD))                         | 0.11 (0.07)        | 0.11 (0.07)        |

|                                              |                                  |                               |
|----------------------------------------------|----------------------------------|-------------------------------|
| Cannabis Resin Interpolated (mean (SD))      | 0.06 (0.08)                      | 0.06 (0.08)                   |
| THC Content Cannabis Herb (mean (SD))        | 0.10 (0.04)                      | 0.10 (0.04)                   |
| Cannabis Herb Interpolated (mean (SD))       | 0.07 (0.04)                      | 0.07 (0.04)                   |
| Amphetamine Use (Last Year %) (median [IQR]) | 0.40 [0.20, 0.70]                | 0.40 [0.20, 0.70]             |
| Amphetamine Interpolated (mean (SD))         | 0.46 (0.52)                      | 0.45 (0.51)                   |
| Cocaine Use (Last Year %) (median [IQR])     | 1.10 [0.80, 1.90]                | 1.00 [0.60, 1.90]             |
| Cocaine Use Interpolated (median [IQR])      | 1.10 [0.80, 2.20]                | 1.10 [0.80, 2.20]             |
|                                              |                                  |                               |
| Median Household Income (median [IQR])       | 50502.00 [28365.00,<br>50502.00] | 28560.67 [18506.70, 34834.70] |

Supplementary Table S3.: Regression Modelling Results Including Slopes and Significance Levels and E-Values for Tobacco-Cancer Relationships  
- Significant Positive Slopes at Mixed Effects Regression

| Cancer                | $\beta$ -<br>Estimate | Std.<br>Error | t-<br>statistic | P-Value      | Sigma | logLik   | AIC      | E-Value<br>Estimate | 95%<br>Lower<br>Bound<br>of E-<br>Value |      |
|-----------------------|-----------------------|---------------|-----------------|--------------|-------|----------|----------|---------------------|-----------------------------------------|------|
| Stomach               | 0.018                 | 0.002         | 11.510          | 1.45E-<br>29 | 0.262 | -392.259 | 792.519  | 1.33                | 1.29                                    |      |
| Non-Seminoma          | 0.235                 | 0.023         | 10.055          | 5.36E-<br>12 | 0.664 | -41.483  | 90.967   | 2.10                | 1.92                                    |      |
| Larynx                | 0.020                 | 0.002         | 8.201           | 4.71E-<br>16 | 0.446 | -        | 1199.941 | 2407.881            | 1.25                                    | 1.21 |
| Ovary                 | 0.016                 | 0.002         | 7.643           | 3.57E-<br>14 | 0.370 | -897.453 | 1802.907 | 1.24                | 1.20                                    |      |
| Cervix                | 0.011                 | 0.002         | 5.005           | 6.19E-<br>07 | 0.377 | -995.219 | 1998.438 | 1.20                | 1.15                                    |      |
| Seminoma              | 0.013                 | 0.005         | 2.525           | 0.0160       | 0.145 | 13.694   | -19.387  | 1.38                | 1.15                                    |      |
| Corpus Uteri          | 0.007                 | 0.003         | 2.114           | 0.0347       | 0.587 | -        | 1810.787 | 3629.574            | 1.11                                    | 1.03 |
| Oropharynx            | 0.013                 | 0.008         | 1.593           | 0.1119       | 0.900 | -536.104 | 1080.208 | 1.13                | 1.00                                    |      |
| Breast                | 0.003                 | 0.004         | 0.735           | 0.4626       | 0.901 | -        | 2509.267 | 5026.534            | 1.06                                    | 1.00 |
| Leukaemia - Lymphoid  | -0.001                | 0.003         | -0.196          | 0.8443       | 0.308 | -101.932 | 211.863  | 1.04                | -                                       |      |
| Gallbladder & Biliary | -0.001                | 0.003         | -0.281          | 0.7786       | 0.237 | -157.881 | 323.763  | 1.06                | -                                       |      |
| Medulloblastoma       | -0.002                | 0.005         | -0.420          | 0.6807       | 0.085 | 10.587   | -13.174  | 1.18                | -                                       |      |
| Ovarian Dysgerminoma  | -0.001                | 0.003         | -0.449          | 0.6599       | 0.057 | 17.448   | -26.896  | 1.17                | -                                       |      |
| Leukaemia - Myeloid   | -0.006                | 0.004         | -1.466          | 0.1434       | 0.497 | -296.978 | 601.957  | 1.12                | -                                       |      |
| Hepatocellular        | -0.010                | 0.004         | -2.321          | 0.0237       | 0.236 | -4.536   | 17.071   | 1.24                | -                                       |      |
| Vagina                | -0.006                | 0.002         | -2.502          | 0.0131       | 0.174 | 62.399   | -116.797 | 1.22                | -                                       |      |

|                  |        |       |         |          |       |          |          |      |   |
|------------------|--------|-------|---------|----------|-------|----------|----------|------|---|
| Mesothelioma     | -0.030 | 0.010 | -3.121  | 0.0021   | 0.535 | -143.442 | 294.883  | 1.29 | - |
| Kaposi           | -0.006 | 0.002 | -3.319  | 0.0011   | 0.097 | 118.990  | -229.981 | 1.31 | - |
| Brain            | -0.009 | 0.002 | -4.103  | 4.28E-05 | 0.437 | 1115.508 | 2239.017 | 1.15 | - |
| Lung             | -0.005 | 0.001 | -4.154  | 3.44E-05 | 0.188 | 210.962  | -413.924 | 1.18 | - |
| Penis            | -0.010 | 0.002 | -4.676  | 3.25E-06 | 0.281 | -281.959 | 571.918  | 1.21 | - |
| Leukaemia        | -0.017 | 0.003 | -4.856  | 1.32E-06 | 0.543 | 1528.963 | 3065.927 | 1.20 | - |
| Hodgkins         | -0.009 | 0.002 | -5.580  | 2.91E-08 | 0.228 | -42.273  | 92.547   | 1.23 | - |
| Liver            | -0.011 | 0.002 | -5.588  | 2.79E-08 | 0.270 | -355.957 | 719.914  | 1.24 | - |
| Bladder          | -0.011 | 0.002 | -5.685  | 1.54E-08 | 0.338 | -775.358 | 1558.716 | 1.21 | - |
| Vulva & Vagina   | -0.012 | 0.002 | -6.312  | 3.96E-10 | 0.231 | -79.738  | 167.476  | 1.27 | - |
| Vulva            | -0.031 | 0.005 | -6.537  | 4.16E-10 | 0.345 | -88.818  | 185.637  | 1.39 | - |
| Anus             | -0.012 | 0.002 | -6.681  | 3.49E-11 | 0.255 | -205.795 | 419.590  | 1.26 | - |
| Thyroid          | -0.017 | 0.002 | -7.759  | 1.70E-14 | 0.295 | -485.156 | 978.312  | 1.29 | - |
| Oesophagus       | -0.020 | 0.003 | -7.763  | 1.43E-14 | 0.447 | 1313.209 | 2634.417 | 1.25 | - |
| Myeloma          | -0.013 | 0.002 | -7.790  | 1.35E-14 | 0.238 | -106.338 | 220.677  | 1.28 | - |
| Oropharynx_Broad | -0.031 | 0.004 | -8.596  | 1.28E-16 | 0.414 | -285.579 | 579.158  | 1.34 | - |
| Pancreas         | -0.015 | 0.002 | -8.766  | 4.44E-18 | 0.296 | -582.477 | 1172.954 | 1.27 | - |
| Colorectum       | -0.013 | 0.001 | -9.212  | 9.29E-20 | 0.252 | -212.852 | 433.705  | 1.27 | - |
| Kidney           | -0.017 | 0.002 | -10.458 | 7.60E-25 | 0.271 | -450.969 | 909.938  | 1.31 | - |

|                       |        |       |         |           |       |          |          |          |      |
|-----------------------|--------|-------|---------|-----------|-------|----------|----------|----------|------|
| Testis                | -0.021 | 0.002 | -10.994 | 6.03E-27  | 0.266 | -281.370 | 570.741  | 1.36     | -    |
| Non-Hodgkins lymphoma | -0.030 | 0.002 | -14.664 | 8.68E-46  | 0.347 | -779.942 | 1567.883 | 1.38     | -    |
| All Cancers           | -0.020 | 0.001 | -16.352 | 1.86E-51  | 0.186 | 138.489  | -268.979 | 1.44     | -    |
| Prostate              | -0.031 | 0.002 | -17.437 | 1.15E-62  | 0.297 | -606.050 | 1220.101 | 1.43     | -    |
| Melanoma              | -0.043 | 0.002 | -17.672 | 3.41E-64  | 0.420 | -        | 1168.005 | 2344.011 | 1.43 |
| All Cancers nMSC      | -0.022 | 0.001 | -28.345 | 6.07E-140 | 0.106 | 956.888  | -        | 1905.777 | 1.71 |



Supplementary Table S4.: Regression Modelling Results Including Slopes and Significance Levels and E-Values for Alcohol-Cancer Relationships  
- Significant Positive Slopes at Mixed Effects Regression

| Cancer                | $\beta$ -Estimate | Std.Error | P-Value  | P.Adj.Holm | E-Value Estimate | E-Value Lower Bound |
|-----------------------|-------------------|-----------|----------|------------|------------------|---------------------|
| Stomach               | 0.063             | 0.005     | 1.99E-32 | 8.15E-31   | 1.80             | 1.70                |
| Larynx                | 0.060             | 0.007     | 6.93E-16 | 2.70E-14   | 1.51             | 1.42                |
| Oesophagus            | 0.066             | 0.008     | 1.97E-15 | 7.50E-14   | 1.54             | 1.45                |
| Liver                 | 0.045             | 0.006     | 1.94E-12 | 7.19E-11   | 1.61             | 1.48                |
| Myeloma               | 0.034             | 0.005     | 5.05E-11 | 1.77E-09   | 1.54             | 1.42                |
| Cervix                | 0.047             | 0.007     | 1.73E-10 | 5.89E-09   | 1.49             | 1.38                |
| Prostate              | 0.040             | 0.006     | 2.86E-10 | 9.43E-09   | 1.48             | 1.37                |
| Breast                | 0.067             | 0.011     | 7.40E-10 | 2.30E-08   | 1.35             | 1.27                |
| Ovary                 | 0.039             | 0.007     | 3.10E-09 | 9.31E-08   | 1.44             | 1.33                |
| Lung                  | 0.020             | 0.004     | 9.49E-08 | 2.75E-06   | 1.44             | 1.32                |
| Leukaemia - Lymphoid  | 0.045             | 0.009     | 3.64E-07 | 9.82E-06   | 1.56             | 1.40                |
| Colorectum            | 0.013             | 0.004     | 3.56E-03 | 7.48E-02   | 1.27             | 1.14                |
| Vagina                | 0.020             | 0.010     | 4.20E-02 | 7.99E-01   | 1.45             | 1.07                |
| Leukaemia - Myeloid   | 0.024             | 0.014     | 9.50E-02 | 1.00E+00   | 1.26             | 1.00                |
| All Cancers nNMSC     | 0.005             | 0.004     | 1.31E-01 | 1.00E+00   | 1.23             | 1.00                |
| All Cancers           | 0.005             | 0.005     | 3.32E-01 | 1.00E+00   | 1.17             | 1.00                |
| Kidney                | 0.005             | 0.006     | 3.35E-01 | 1.00E+00   | 1.15             | 1.00                |
| Penis                 | 0.003             | 0.005     | 5.61E-01 | 1.00E+00   | 1.11             | 1.00                |
| Vulva                 | 0.010             | 0.019     | 5.83E-01 | 1.00E+00   | 1.19             | 1.00                |
| Corpus Uteri          | 0.002             | 0.010     | 8.46E-01 | 1.00E+00   | 1.06             | 1.00                |
| Pancreas              | 0.001             | 0.006     | 8.57E-01 | 1.00E+00   | 1.06             | 1.00                |
| Non-Hodgkins lymphoma | 0.000             | 0.007     | 9.88E-01 | 1.00E+00   | 1.02             | -                   |
| Non-Seminoma          | -0.032            | 0.424     | 9.41E-01 | 1.00E+00   | 1.17             | -                   |
| Anus                  | -0.002            | 0.005     | 7.04E-01 | 1.00E+00   | 1.09             | -                   |
| Kaposi                | -0.004            | 0.008     | 6.48E-01 | 1.00E+00   | 1.22             | -                   |
| Ovarian Dysgerminoma  | -0.010            | 0.014     | 4.84E-01 | 1.00E+00   | 1.64             | -                   |
| Oropharynx Broad      | -0.018            | 0.016     | 2.50E-01 | 1.00E+00   | 1.24             | -                   |
| Vulva & Vagina        | -0.008            | 0.006     | 1.84E-01 | 1.00E+00   | 1.22             | -                   |
| Hepatocellular        | -0.023            | 0.017     | 1.78E-01 | 1.00E+00   | 1.41             | -                   |
| Medulloblastoma       | -0.037            | 0.027     | 1.91E-01 | 1.00E+00   | 2.43             | -                   |
| Leukaemia             | -0.015            | 0.011     | 1.64E-01 | 1.00E+00   | 1.18             | -                   |
| Brain                 | -0.016            | 0.006     | 5.43E-03 | 1.09E-01   | 1.22             | -                   |
| Mesothelioma          | -0.114            | 0.035     | 1.34E-03 | 2.94E-02   | 1.72             | -                   |
| Seminoma              | -0.088            | 0.025     | 1.13E-03 | 2.59E-02   | 3.01             | -                   |
| Hodgkins              | -0.017            | 0.005     | 1.92E-04 | 4.60E-03   | 1.35             | -                   |
| Melanoma              | -0.036            | 0.008     | 1.11E-05 | 2.78E-04   | 1.36             | -                   |
| Gallbladder & Biliary | -0.036            | 0.007     | 2.01E-06 | 5.22E-05   | 1.56             | -                   |
| Thyroid               | -0.036            | 0.007     | 1.68E-07 | 4.69E-06   | 1.47             | -                   |
| Testis                | -0.037            | 0.006     | 7.00E-10 | 2.24E-08   | 1.51             | -                   |
| Oropharynx            | -0.179            | 0.025     | 2.90E-12 | 1.04E-10   | 1.72             | -                   |

|         |        |       |          |          |      |   |
|---------|--------|-------|----------|----------|------|---|
| Bladder | -0.056 | 0.006 | 4.89E-20 | 1.96E-18 | 1.60 | - |
|---------|--------|-------|----------|----------|------|---|

Supplementary Table S5.: Regression Modelling Results Including Slopes and Significance Levels and E-Values for Alcohol-Cancer Relationships  
- Significant Positive Slopes at Mixed Effects Regression

| Cancer                | $\beta$ -Estimate | Std.Error | P_Value  | P.Adj.Holm | E-Value Estimate | E-Value Lower Bound |
|-----------------------|-------------------|-----------|----------|------------|------------------|---------------------|
| Larynx                | 13.9624           | 1.0975    | 8.82E-30 | 2.47E-28   | 5.37E+20         | 3.88E+17            |
| Oesophagus            | 7.4666            | 0.9646    | 1.64E-13 | 4.10E-12   | 5.43E+12         | 3.92E+09            |
| Leukaemia - Myeloid   | 14.1710           | 1.8814    | 1.75E-11 | 4.02E-10   | 4.42E+14         | 8.32E+10            |
| Lung                  | 5.7026            | 0.7822    | 2.99E-12 | 7.18E-11   | 1.34E+12         | 8.98E+08            |
| Myeloma               | 3.6037            | 0.6921    | 3.63E-07 | 6.54E-06   | 4.78E+08         | 3.41E+05            |
| Leukaemia - Lymphoid  | 5.4028            | 1.1279    | 5.50E-06 | 9.34E-05   | 2.82E+09         | 5.18E+05            |
| Gallbladder & Biliary | 4.5657            | 1.6295    | 5.57E-03 | 8.91E-02   | 1.63E+11         | 3.93E+03            |
| Colorectum            | 2.7213            | 1.0322    | 8.82E-03 | 1.32E-01   | 2.37E+04         | 2.20E+01            |
| Kidney                | 1.1616            | 0.5289    | 2.89E-02 | 3.75E-01   | 7.36E+03         | 4.35E+00            |
| Stomach               | 2.0769            | 1.0365    | 4.60E-02 | 5.52E-01   | 3.43E+03         | 1.67E+00            |
| Hodgkins              | 1.1497            | 0.6256    | 6.70E-02 | 7.37E-01   | 1.64E+03         | 1.00E+00            |
| Oropharynx_Broad      | 1.2403            | 1.4225    | 3.89E-01 | 1.00E+00   | 1.38E+05         | 1.00E+00            |
| Liver                 | 0.7396            | 1.0515    | 4.82E-01 | 1.00E+00   | 2.75E+01         | 1.00E+00            |
| All Cancers nMMS      | 0.2159            | 0.5022    | 6.68E-01 | 1.00E+00   | 8.35E+01         | 1.00E+00            |
| Anus                  | 0.1794            | 0.8052    | 8.24E-01 | 1.00E+00   | 3.99E+00         | 1.00E+00            |
| Non-Hodgkins lymphoma | -0.7235           | 1.1659    | 5.35E-01 | 1.00E+00   | 1.96E+01         | -                   |
| Thyroid               | -0.8420           | 1.1835    | 4.77E-01 | 1.00E+00   | 2.72E+01         | -                   |
| Cervix                | -1.5008           | 1.2630    | 2.36E-01 | 1.00E+00   | 1.59E+02         | -                   |
| Kaposi                | -0.3104           | 0.2339    | 1.99E-01 | 1.00E+00   | 4.67E+05         | -                   |
| Bladder               | -1.3475           | 0.8408    | 1.10E-01 | 9.91E-01   | 7.05E+02         | -                   |
| Pancreas              | -1.1066           | 0.6108    | 7.11E-02 | 7.37E-01   | 1.74E+03         | -                   |
| All Cancers           | -1.1866           | 0.5229    | 2.50E-02 | 3.50E-01   | 1.79E+04         | -                   |
| Testis                | -5.5780           | 1.0226    | 1.06E-07 | 2.01E-06   | 1.14E+09         | -                   |
| Melanoma              | -8.0840           | 1.4581    | 6.63E-08 | 1.33E-06   | 1.04E+09         | -                   |
| Corpus Uteri          | -7.6375           | 1.3293    | 2.30E-08 | 4.84E-07   | 3.43E+09         | -                   |
| Ovary                 | -5.3495           | 0.8948    | 6.65E-09 | 1.46E-07   | 7.65E+09         | -                   |
| Oropharynx            | -30.6373          | 3.1850    | 1.85E-16 | 4.81E-15   | 1.22E+18         | -                   |
| Breast                | -5.9859           | 0.5782    | 1.46E-21 | 3.95E-20   | 1.24E+17         | -                   |
| Brain                 | -13.5135          | 0.9459    | 2.26E-35 | 6.57E-34   | 2.52E+23         | -                   |
| Prostate              | -17.2115          | 1.0063    | 9.55E-46 | 2.87E-44   | 1.19E+28         | -                   |

Supplementary Table S6.: Regression Modelling Results Including Slopes and Significance Levels and E-Values for Last Month Cannabis-Cancer Relationships  
- Significant Positive Slopes at Mixed Effects Regression

| Cancer                | $\beta$ -Estimate | Std.Error | P_Value  | P.Adj.Holm | E-Value Estimate | E-Value Lower Bound |
|-----------------------|-------------------|-----------|----------|------------|------------------|---------------------|
| Larynx                | 13.9624           | 1.0975    | 8.82E-30 | 2.47E-28   | 5.37E+20         | 3.88E+17            |
| Oesophagus            | 7.4666            | 0.9646    | 1.64E-13 | 4.10E-12   | 5.43E+12         | 3.92E+09            |
| Leukaemia - Myeloid   | 14.1710           | 1.8814    | 1.75E-11 | 4.02E-10   | 4.42E+14         | 8.32E+10            |
| Lung                  | 5.7026            | 0.7822    | 2.99E-12 | 7.18E-11   | 1.34E+12         | 8.98E+08            |
| Myeloma               | 3.6037            | 0.6921    | 3.63E-07 | 6.54E-06   | 4.78E+08         | 3.41E+05            |
| Leukaemia - Lymphoid  | 5.4028            | 1.1279    | 5.50E-06 | 9.34E-05   | 2.82E+09         | 5.18E+05            |
| Gallbladder & Biliary | 4.5657            | 1.6295    | 5.57E-03 | 8.91E-02   | 1.63E+11         | 3.93E+03            |
| Colorectum            | 2.7213            | 1.0322    | 8.82E-03 | 1.32E-01   | 2.37E+04         | 2.20E+01            |
| Kidney                | 1.1616            | 0.5289    | 2.89E-02 | 3.75E-01   | 7.36E+03         | 4.35E+00            |
| Stomach               | 2.0769            | 1.0365    | 4.60E-02 | 5.52E-01   | 3.43E+03         | 1.67E+00            |
| Hodgkins              | 1.1497            | 0.6256    | 6.70E-02 | 7.37E-01   | 1.64E+03         | 1.00E+00            |
| Oropharynx_Broad      | 1.2403            | 1.4225    | 3.89E-01 | 1.00E+00   | 1.38E+05         | 1.00E+00            |
| Liver                 | 0.7396            | 1.0515    | 4.82E-01 | 1.00E+00   | 2.75E+01         | 1.00E+00            |
| All Cancers nMMS      | 0.2159            | 0.5022    | 6.68E-01 | 1.00E+00   | 8.35E+01         | 1.00E+00            |
| Anus                  | 0.1794            | 0.8052    | 8.24E-01 | 1.00E+00   | 3.99E+00         | 1.00E+00            |
| Non-Hodgkins lymphoma | -0.7235           | 1.1659    | 5.35E-01 | 1.00E+00   | 1.96E+01         | -                   |
| Thyroid               | -0.8420           | 1.1835    | 4.77E-01 | 1.00E+00   | 2.72E+01         | -                   |
| Cervix                | -1.5008           | 1.2630    | 2.36E-01 | 1.00E+00   | 1.59E+02         | -                   |
| Kaposi                | -0.3104           | 0.2339    | 1.99E-01 | 1.00E+00   | 4.67E+05         | -                   |
| Bladder               | -1.3475           | 0.8408    | 1.10E-01 | 9.91E-01   | 7.05E+02         | -                   |
| Pancreas              | -1.1066           | 0.6108    | 7.11E-02 | 7.37E-01   | 1.74E+03         | -                   |
| All Cancers           | -1.1866           | 0.5229    | 2.50E-02 | 3.50E-01   | 1.79E+04         | -                   |
| Testis                | -5.5780           | 1.0226    | 1.06E-07 | 2.01E-06   | 1.14E+09         | -                   |
| Melanoma              | -8.0840           | 1.4581    | 6.63E-08 | 1.33E-06   | 1.04E+09         | -                   |
| Corpus Uteri          | -7.6375           | 1.3293    | 2.30E-08 | 4.84E-07   | 3.43E+09         | -                   |
| Ovary                 | -5.3495           | 0.8948    | 6.65E-09 | 1.46E-07   | 7.65E+09         | -                   |
| Oropharynx            | -30.6373          | 3.1850    | 1.85E-16 | 4.81E-15   | 1.22E+18         | -                   |
| Breast                | -5.9859           | 0.5782    | 1.46E-21 | 3.95E-20   | 1.24E+17         | -                   |
| Brain                 | -13.5135          | 0.9459    | 2.26E-35 | 6.57E-34   | 2.52E+23         | -                   |
| Prostate              | -17.2115          | 1.0063    | 9.55E-46 | 2.87E-44   | 1.19E+28         | -                   |

Supplementary Table S7.: Regression Modelling Results Including Slopes and Significance Levels and E-Values for THC concentration of Cannabis Herb-Cancer Relationships  
- Significant Positive Slopes at Linear Regression

| Cancer                | $\beta$ -Estimate | Std.Error | P_Value   | P.Adj.Holm | E-Value Estimate | E-Value Lower Bound |
|-----------------------|-------------------|-----------|-----------|------------|------------------|---------------------|
| Seminoma              | 6.0276            | 0.0678    | 3.97E-24  | 9.14E-23   | Inf              | Inf                 |
| All Cancers nNMSC     | 3.9813            | 0.1587    | 1.19E-114 | 4.39E-113  | 2.98E+06         | 9.84E+05            |
| Prostate              | 6.4439            | 0.2773    | 8.42E-103 | 3.03E-101  | 5.85E+05         | 2.03E+05            |
| Kidney                | 6.5740            | 0.3027    | 1.07E-91  | 3.73E-90   | 2.45E+05         | 8.52E+04            |
| Melanoma              | 6.5178            | 0.3088    | 3.42E-87  | 1.16E-85   | 1.82E+05         | 6.32E+04            |
| Lung                  | 4.4753            | 0.2126    | 9.36E-87  | 3.09E-85   | 1.79E+05         | 6.19E+04            |
| Pancreas              | 5.6047            | 0.2852    | 4.47E-77  | 1.43E-75   | 8.03E+04         | 2.80E+04            |
| Testis                | 4.6650            | 0.2423    | 5.39E-72  | 1.67E-70   | 1.44E+06         | 3.66E+05            |
| Oesophagus            | 5.9347            | 0.3633    | 1.49E-55  | 4.48E-54   | 1.34E+04         | 4.68E+03            |
| Anus                  | 3.6486            | 0.2289    | 5.30E-52  | 1.54E-50   | 1.42E+05         | 3.61E+04            |
| Gallbladder & Biliary | -5.0564           | 0.3274    | 1.14E-48  | 3.20E-47   | 1.82E+05         | -                   |
| Non-Hodgkins lymphoma | 3.4585            | 0.2494    | 3.14E-41  | 8.48E-40   | 3.90E+03         | 1.34E+03            |
| Cervix                | 5.3564            | 0.3994    | 7.07E-39  | 1.84E-37   | 2.86E+03         | 9.90E+02            |
| All Cancers           | 3.5844            | 0.3048    | 5.17E-29  | 1.29E-27   | 3.64E+04         | 7.12E+03            |
| Leukaemia - Myeloid   | 8.0929            | 0.7028    | 1.33E-24  | 3.19E-23   | 5.89E+07         | 3.17E+06            |
| Hepatocellular        | -14.9401          | 1.4736    | 2.51E-09  | 3.76E-08   | 2.51E+73         | -                   |
| Ovary                 | 3.0285            | 0.3050    | 1.44E-22  | 3.16E-21   | 4.33E+02         | 1.50E+02            |
| Oropharynx            | -12.8760          | 1.3853    | 4.71E-18  | 9.42E-17   | 9.45E+05         | -                   |
| Breast                | 4.1776            | 0.4567    | 1.73E-19  | 3.63E-18   | 2.59E+02         | 9.13E+01            |
| Leukaemia - Lymphoid  | 3.3598            | 0.4196    | 5.55E-14  | 1.06E-12   | 3.17E+05         | 1.70E+04            |
| Stomach               | 2.6638            | 0.3901    | 1.21E-11  | 2.19E-10   | 7.91E+01         | 2.72E+01            |
| Vagina                | 2.0475            | 0.3207    | 1.72E-09  | 2.93E-08   | 1.26E+06         | 2.10E+04            |

|                  |         |        |          |          |          |          |
|------------------|---------|--------|----------|----------|----------|----------|
| Myeloma          | 1.2672  | 0.2103 | 2.23E-09 | 3.57E-08 | 1.31E+02 | 3.33E+01 |
| Liver            | -2.1072 | 0.3926 | 9.59E-08 | 1.34E-06 | 8.73E+01 | -        |
| Bladder          | -1.4861 | 0.2809 | 1.39E-07 | 1.80E-06 | 3.42E+01 | -        |
| Larynx           | -1.6197 | 0.3108 | 2.13E-07 | 2.56E-06 | 3.27E+01 | -        |
| Oropharynx_Broad | 2.3735  | 0.4968 | 2.42E-06 | 2.66E-05 | 2.23E+02 | 3.19E+01 |
| Brain            | 0.9826  | 0.2818 | 5.01E-04 | 5.01E-03 | 1.27E+01 | 4.01E+00 |
| Kaposi           | 2.8692  | 0.8767 | 1.51E-03 | 1.36E-02 | 2.96E+04 | 9.47E+01 |
| Corpus Uteri     | -1.2291 | 0.4552 | 7.01E-03 | 5.61E-02 | 7.64E+00 | -        |
| Mesothelioma     | 1.6450  | 0.7649 | 3.37E-02 | 2.36E-01 | 3.00E+02 | 2.52E+00 |
| Thyroid          | 0.6214  | 0.4363 | 1.55E-01 | 9.28E-01 | 4.82E+00 | 1.00E+00 |
| Hodgkins         | -0.3068 | 0.2307 | 1.84E-01 | 9.28E-01 | 4.40E+00 | -        |
| Penis            | -0.1852 | 0.2347 | 4.30E-01 | 1.00E+00 | 2.92E+00 | -        |
| Colorectum       | 0.0966  | 0.1847 | 6.01E-01 | 1.00E+00 | 1.98E+00 | 1.00E+00 |
| Non-Seminoma     | -2.4302 | 5.5344 | 6.65E-01 | 1.00E+00 | 4.53E+01 | -        |
| Leukaemia        | 0.1491  | 0.4996 | 7.65E-01 | 1.00E+00 | 1.63E+00 | 1.00E+00 |

Supplementary Table S8.: Regression Modelling Results Including Slopes and Significance Levels and E-Values for Amphetamine Use Cannabis-Cancer Relationships  
- Significant Positive Slopes at Mixed Effects Regression

| Cancer                | $\beta$ -Estimate | Std.Error | P_Value  | P.Adj.Holm | E-Value Estimate | E-Value Lower Bound |
|-----------------------|-------------------|-----------|----------|------------|------------------|---------------------|
| Gallbladder & Biliary | 0.3018            | 0.0392    | 6.34E-14 | 1.52E-12   | 5.78E+00         | 4.16E+00            |
| Leukaemia - Myeloid   | 0.2624            | 0.0389    | 1.37E-10 | 2.75E-09   | 3.39E+00         | 2.64E+00            |
| Bladder               | 0.0903            | 0.0249    | 3.01E-04 | 3.62E-03   | 2.11E+00         | 1.60E+00            |
| Larynx                | 0.0145            | 0.0255    | 5.70E-01 | 1.00E+00   | 1.28E+00         | 1.00E+00            |
| Stomach               | -0.0071           | 0.0195    | 7.16E-01 | 1.00E+00   | 1.22E+00         | -                   |
| Corpus Uteri          | -0.0318           | 0.0249    | 2.01E-01 | 6.02E-01   | 1.50E+00         | -                   |
| Pancreas              | -0.0241           | 0.0161    | 1.35E-01 | 5.39E-01   | 1.54E+00         | -                   |
| Cervix                | -0.0451           | 0.0272    | 9.80E-02 | 4.90E-01   | 1.60E+00         | -                   |
| Thyroid               | -0.0607           | 0.0329    | 6.56E-02 | 3.93E-01   | 1.64E+00         | -                   |
| Oropharynx_Broad      | -0.0756           | 0.0288    | 1.05E-02 | 7.32E-02   | 4.12E+00         | -                   |
| Leukaemia - Lymphoid  | -0.0727           | 0.0250    | 4.00E-03 | 3.20E-02   | 2.03E+00         | -                   |
| Ovary                 | -0.0595           | 0.0194    | 2.22E-03 | 2.00E-02   | 1.96E+00         | -                   |
| Anus                  | -0.0735           | 0.0214    | 6.16E-04 | 6.16E-03   | 2.05E+00         | -                   |
| Oropharynx            | -0.4242           | 0.1182    | 4.17E-04 | 4.58E-03   | 2.21E+00         | -                   |
| Hodgkins              | -0.0851           | 0.0188    | 6.69E-06 | 9.36E-05   | 2.33E+00         | -                   |
| Kaposi                | -0.0356           | 0.0076    | 1.79E-05 | 2.33E-04   | 2.98E+00         | -                   |
| Kidney                | -0.0687           | 0.0144    | 2.05E-06 | 3.08E-05   | 2.45E+00         | -                   |
| Liver                 | -0.1392           | 0.0287    | 1.54E-06 | 2.46E-05   | 2.47E+00         | -                   |
| Testis                | -0.1376           | 0.0248    | 4.14E-08 | 7.04E-07   | 2.71E+00         | -                   |
| Lung                  | -0.1042           | 0.0183    | 1.87E-08 | 3.37E-07   | 2.68E+00         | -                   |
| Brain                 | -0.1413           | 0.0240    | 6.03E-09 | 1.15E-07   | 2.64E+00         | -                   |
| Melanoma              | -0.2016           | 0.0288    | 6.16E-12 | 1.29E-10   | 3.15E+00         | -                   |
| Oesophagus            | -0.1690           | 0.0239    | 3.97E-12 | 8.73E-11   | 3.19E+00         | -                   |

|                       |         |        |          |          |          |   |
|-----------------------|---------|--------|----------|----------|----------|---|
| Myeloma               | -0.1327 | 0.0175 | 9.64E-14 | 2.22E-12 | 3.36E+00 | - |
| Non-Hodgkins lymphoma | -0.1776 | 0.0208 | 9.38E-17 | 2.34E-15 | 3.88E+00 | - |
| Colorectum            | -0.1956 | 0.0205 | 2.41E-20 | 6.28E-19 | 4.10E+00 | - |
| All Cancers nMSC      | -0.1148 | 0.0111 | 9.13E-23 | 2.47E-21 | 8.80E+00 | - |
| All Cancers           | -0.1113 | 0.0098 | 1.07E-23 | 2.99E-22 | 5.66E+00 | - |
| Breast                | -0.1556 | 0.0127 | 2.30E-31 | 6.67E-30 | 5.86E+00 | - |
| Prostate              | -0.3794 | 0.0242 | 2.14E-47 | 6.43E-46 | 7.90E+00 | - |



Supplementary Table S9.: Regression Modelling Results Including Slopes and Significance Levels and E-Values for Cocaine Use Cannabis-Cancer Relationships

- Significant Positive Slopes at Mixed Effects Regression

-

| Cancer                | $\beta$ -Estimate | Std.Error | P_Value  | P.Adj.Holm | E-Value Estimate | E-Value Lower Bound |
|-----------------------|-------------------|-----------|----------|------------|------------------|---------------------|
| Melanoma              | 0.3026            | 0.0252    | 3.28E-31 | 9.52E-30   | 4.76E+00         | 3.96E+00            |
| All Cancers nNMSC     | 0.0767            | 0.0071    | 1.06E-25 | 2.98E-24   | 5.91E+00         | 4.66E+00            |
| Thyroid               | 0.2568            | 0.0256    | 9.71E-23 | 2.62E-21   | 3.84E+00         | 3.19E+00            |
| Hodgkins              | 0.1651            | 0.0170    | 1.81E-21 | 4.70E-20   | 3.26E+00         | 2.76E+00            |
| Liver                 | 0.1904            | 0.0211    | 8.78E-19 | 2.11E-17   | 3.48E+00         | 2.88E+00            |
| Non-Hodgkins lymphoma | 0.1604            | 0.0186    | 2.49E-17 | 5.72E-16   | 3.54E+00         | 2.90E+00            |
| Anus                  | 0.1760            | 0.0205    | 2.89E-17 | 6.35E-16   | 3.28E+00         | 2.72E+00            |
| Testis                | 0.1757            | 0.0222    | 6.57E-15 | 1.31E-13   | 2.99E+00         | 2.48E+00            |
| Myeloma               | 0.1173            | 0.0158    | 2.09E-13 | 3.96E-12   | 2.86E+00         | 2.37E+00            |
| Bladder               | 0.1284            | 0.0184    | 4.74E-12 | 8.54E-11   | 2.85E+00         | 2.33E+00            |
| Colorectum            | 0.1003            | 0.0149    | 3.01E-11 | 5.12E-10   | 2.54E+00         | 2.11E+00            |
| Pancreas              | 0.0884            | 0.0145    | 1.33E-09 | 2.13E-08   | 2.73E+00         | 2.19E+00            |
| Oropharynx_Broad      | 0.2256            | 0.0370    | 2.26E-08 | 2.94E-07   | 4.64E+00         | 3.23E+00            |
| All Cancers           | 0.0850            | 0.0142    | 7.83E-09 | 1.17E-07   | 3.55E+00         | 2.64E+00            |
| Breast                | 0.0517            | 0.0112    | 4.00E-06 | 4.40E-05   | 2.28E+00         | 1.79E+00            |
| Lung                  | 0.0667            | 0.0147    | 6.21E-06 | 6.21E-05   | 2.25E+00         | 1.77E+00            |
| Kidney                | 0.0566            | 0.0137    | 3.72E-05 | 3.35E-04   | 2.18E+00         | 1.69E+00            |
| Gallbladder & Biliary | 0.0851            | 0.0219    | 1.10E-04 | 8.81E-04   | 2.16E+00         | 1.65E+00            |
| Kaposi                | 0.0192            | 0.0111    | 8.93E-02 | 5.36E-01   | 1.96E+00         | 1.00E+00            |
| Brain                 | 0.0271            | 0.0168    | 1.08E-01 | 5.40E-01   | 1.43E+00         | 1.00E+00            |
| Oropharynx            | 0.2084            | 0.1487    | 1.63E-01 | 5.75E-01   | 1.66E+00         | 1.00E+00            |
| Leukaemia - Myeloid   | -0.0172           | 0.0479    | 7.20E-01 | 8.52E-01   | 1.24E+00         | -                   |
| Oesophagus            | -0.0176           | 0.0222    | 4.26E-01 | 8.52E-01   | 1.34E+00         | -                   |

|                      |         |        |          |          |          |   |
|----------------------|---------|--------|----------|----------|----------|---|
| Prostate             | -0.0311 | 0.0213 | 1.44E-01 | 5.75E-01 | 1.50E+00 | - |
| Corpus Uteri         | -0.0524 | 0.0192 | 6.40E-03 | 4.48E-02 | 1.79E+00 | - |
| Leukaemia - Lymphoid | -0.1601 | 0.0289 | 8.13E-08 | 9.76E-07 | 3.23E+00 | - |
| Larynx               | -0.1211 | 0.0214 | 1.86E-08 | 2.61E-07 | 2.47E+00 | - |
| Cervix               | -0.1994 | 0.0239 | 2.16E-16 | 4.53E-15 | 3.24E+00 | - |
| Ovary                | -0.1556 | 0.0167 | 6.59E-20 | 1.65E-18 | 3.44E+00 | - |
| Stomach              | -0.2627 | 0.0175 | 1.25E-46 | 3.74E-45 | 6.47E+00 | - |

Supplementary Table S10.: Regression Modelling Results Including Slopes and Significance Levels and E-Values for Cannabis Herb THC : Daily Cannabis Use Interaction Cannabis-Cancer Relationships  
- Significant Positive Slopes at Mixed Effects Regression

| Cancer                | $\beta$ -Estimate | Std.Error | P_Value  | P.Adj.Holm | E-Value Estimate | E-Value Lower Bound |
|-----------------------|-------------------|-----------|----------|------------|------------------|---------------------|
| Anus                  | 412.7268          | 37.2436   | 4.32E-22 | 1.30E-20   | Inf              | Inf                 |
| Thyroid               | 526.6490          | 61.0909   | 3.27E-15 | 9.47E-14   | Inf              | Inf                 |
| Liver                 | 426.3964          | 59.0183   | 1.86E-11 | 4.84E-10   | Inf              | Inf                 |
| Melanoma              | 309.2841          | 48.0528   | 1.06E-09 | 2.66E-08   | Inf              | Inf                 |
| Non-Hodgkins lymphoma | 199.1670          | 34.2164   | 2.70E-08 | 6.47E-07   | Inf              | Inf                 |
| Myeloma               | 134.4610          | 26.5136   | 9.72E-07 | 2.14E-05   | Inf              | Inf                 |
| Oesophagus            | 182.1030          | 46.9719   | 1.48E-04 | 2.96E-03   | Inf              | Inf                 |
| All Cancers           | 85.8550           | 22.6303   | 3.35E-04 | 6.04E-03   | Inf              | Inf                 |
| Hodgkins              | 110.2881          | 29.6441   | 2.58E-04 | 4.91E-03   | Inf              | 4.85E+134           |
| Breast                | 100.7892          | 29.4649   | 7.75E-04 | 1.24E-02   | Inf              | 9.95E+119           |
| Leukaemia - Lymphoid  | 305.3433          | 91.4881   | 1.75E-03 | 2.63E-02   | Inf              | Inf                 |
| Lung                  | 113.2827          | 36.1718   | 2.03E-03 | 2.84E-02   | Inf              | 3.70E+99            |
| Testis                | 155.4019          | 52.8126   | 3.69E-03 | 4.80E-02   | Inf              | 3.02E+89            |
| Kidney                | 57.6144           | 23.8980   | 1.69E-02 | 2.03E-01   | Inf              | 2.30E+40            |
| All Cancers nMSC      | 32.1477           | 15.9036   | 4.56E-02 | 4.56E-01   | Inf              | 2.13E+09            |
| Leukaemia - Myeloid   | 349.5884          | 174.0222  | 5.09E-02 | 4.56E-01   | Inf              | 1.57E+06            |
| Pancreas              | 47.9978           | 24.3399   | 5.01E-02 | 4.56E-01   | Inf              | 3.81E+01            |
| Kaposi                | 302.5919          | 213.0733  | 2.51E-01 | 1.00E+00   | Inf              | 1.00E+00            |
| Prostate              | 39.8643           | 54.1304   | 4.62E-01 | 1.00E+00   | 1.15E+55         | 1.00E+00            |
| Oropharynx            | -115.0968         | 241.5488  | 6.36E-01 | 1.00E+00   | 5.69E+55         | -                   |
| Larynx                | -29.0589          | 47.9380   | 5.45E-01 | 1.00E+00   | 8.33E+45         | -                   |
| Cervix                | -58.6212          | 54.1668   | 2.81E-01 | 1.00E+00   | 1.51E+89         | -                   |

|                       |           |         |          |          |           |   |
|-----------------------|-----------|---------|----------|----------|-----------|---|
| Colorectum            | -82.0065  | 57.2284 | 1.54E-01 | 9.22E-01 | 8.79E+115 | - |
| Brain                 | -79.3731  | 46.6710 | 9.07E-02 | 6.35E-01 | 1.91E+127 | - |
| Oropharynx_Broad      | -60.6127  | 27.7363 | 3.51E-02 | 3.86E-01 | Inf       | - |
| Corpus Uteri          | -310.2456 | 85.6156 | 3.77E-04 | 6.40E-03 | Inf       | - |
| Bladder               | -218.4021 | 45.9669 | 4.10E-06 | 8.62E-05 | Inf       | - |
| Gallbladder & Biliary | -223.5176 | 38.2502 | 2.92E-08 | 6.71E-07 | Inf       | - |
| Ovary                 | -302.7960 | 40.8986 | 5.09E-12 | 1.37E-10 | Inf       | - |
| Stomach               | -362.4852 | 43.7580 | 2.59E-14 | 7.24E-13 | Inf       | - |

Supplementary Table S11.: Regression Modelling Results Including Slopes and Significance Levels and E-Values for  
- Cannabis Resin THC : Daily Cannabis Use Interaction Cannabis-Cancer Relationships  
- Significant Positive Slopes at Mixed Effects Regression

| Cancer                | $\beta$ -Estimate | Std.Error | P_Value  | P.Adj.Holm | E-Value Estimate | E-Value Lower Bound |
|-----------------------|-------------------|-----------|----------|------------|------------------|---------------------|
| Melanoma              | 123.8679          | 15.5947   | 3.30E-13 | 8.90E-12   | Inf              | Inf                 |
| Oesophagus            | 89.5415           | 13.6501   | 7.10E-10 | 1.78E-08   | Inf              | Inf                 |
| Liver                 | 108.9451          | 25.6312   | 3.86E-05 | 7.33E-04   | Inf              | 1.30E+94            |
| Hodgkins              | 48.8718           | 11.9709   | 6.71E-05 | 1.21E-03   | 8.39E+129        | 6.59E+67            |
| All Cancers           | 24.2464           | 6.2438    | 3.50E-04 | 5.60E-03   | 3.18E+153        | 2.15E+76            |
| Bladder               | 63.6961           | 19.2668   | 1.17E-03 | 1.64E-02   | 3.08E+115        | 2.17E+47            |
| Oropharynx            | 570.5800          | 173.0068  | 2.58E-03 | 2.65E-02   | Inf              | 1.96E+130           |
| All Cancers nNMSC     | 23.1056           | 7.2198    | 1.79E-03 | 2.15E-02   | Inf              | 1.35E+86            |
| Myeloma               | 28.7010           | 9.3067    | 2.41E-03 | 2.65E-02   | 5.52E+107        | 3.94E+39            |
| Lung                  | 24.0030           | 10.5493   | 2.42E-02 | 1.94E-01   | 2.22E+78         | 1.79E+11            |
| Anus                  | 21.5360           | 16.3543   | 1.90E-01 | 1.00E+00   | 7.88E+44         | 1.00E+00            |
| Non-Hodgkins lymphoma | 8.6548            | 8.9775    | 3.37E-01 | 1.00E+00   | 1.18E+34         | 1.00E+00            |
| Thyroid               | 24.6482           | 27.3899   | 3.70E-01 | 1.00E+00   | 6.66E+31         | 1.00E+00            |
| Oropharynx_Broad      | -3.0714           | 6.4918    | 6.39E-01 | 1.00E+00   | 1.34E+19         | -                   |
| Pancreas              | -5.4923           | 8.9133    | 5.39E-01 | 1.00E+00   | 7.53E+20         | -                   |
| Brain                 | -10.0795          | 14.1286   | 4.77E-01 | 1.00E+00   | 4.68E+21         | -                   |
| Kidney                | -9.4814           | 9.8204    | 3.36E-01 | 1.00E+00   | 5.44E+33         | -                   |
| Breast                | -32.1319          | 10.9960   | 3.99E-03 | 3.59E-02   | 4.28E+98         | -                   |
| Gallbladder & Biliary | -41.8260          | 12.5018   | 1.03E-03 | 1.55E-02   | 1.83E+120        | -                   |
| Leukaemia - Lymphoid  | -145.5173         | 40.7427   | 1.62E-03 | 2.10E-02   | Inf              | -                   |
| Leukaemia - Myeloid   | -424.0653         | 95.1826   | 1.81E-04 | 3.08E-03   | Inf              | -                   |
| Larynx                | -69.6941          | 14.6597   | 4.41E-06 | 8.83E-05   | Inf              | -                   |
| Testis                | -90.9015          | 18.9708   | 3.80E-06 | 7.99E-05   | 2.98E+148        | -                   |

|              |           |         |          |          |     |   |
|--------------|-----------|---------|----------|----------|-----|---|
| Corpus Uteri | -168.5215 | 32.3178 | 5.59E-07 | 1.23E-05 | Inf | - |
| Prostate     | -100.5291 | 19.0616 | 4.36E-07 | 1.00E-05 | Inf | - |
| Cervix       | -119.8792 | 20.0130 | 1.38E-08 | 3.31E-07 | Inf | - |
| Colorectum   | -121.2823 | 15.7807 | 1.48E-12 | 3.85E-11 | Inf | - |
| Ovary        | -157.9161 | 13.5064 | 4.11E-23 | 1.15E-21 | Inf | - |
| Stomach      | -229.6094 | 13.8821 | 1.83E-36 | 5.31E-35 | Inf | - |

Supplementary Table S12.: Collated Results of Bivariate Regressions  
For Cannabis Metrics by Model Type  
Constructed with Significance Levels (P-Values) Adjusted for Multiple Testing

| Last Month           | Daily                 | Herb                  | Resin                 |
|----------------------|-----------------------|-----------------------|-----------------------|
|                      |                       |                       |                       |
|                      | All Cancers           | All Cancers           | All Cancers           |
|                      |                       | All Cancers nNMSC     | All Cancers nNMSC     |
|                      | Anus                  | Anus                  | Anus                  |
|                      |                       |                       | Bladder               |
|                      |                       | Brain                 |                       |
|                      |                       | Breast                | Breast                |
|                      |                       | Colorectum            |                       |
|                      |                       | Corpus Uteri          |                       |
|                      | Hodgkins              |                       |                       |
|                      |                       | Kidney                | Kidney                |
| Larynx               |                       |                       |                       |
|                      | Liver                 |                       |                       |
| Leukaemia - Lymphoid |                       | Leukaemia - Lymphoid  |                       |
| Leukaemia - Myeloid  |                       | Leukaemia - Myeloid   |                       |
| Lung                 | Lung                  | Lung                  | Lung                  |
|                      | Melanoma              | Melanoma              | Melanoma              |
| Myeloma              | Myeloma               | Myeloma               |                       |
|                      | Non-Hodgkins lymphoma | Non-Hodgkins lymphoma | Non-Hodgkins lymphoma |
| Oesophagus           | Oesophagus            | Oesophagus            | Oesophagus            |
|                      |                       |                       | Oropharynx            |
|                      |                       | Oropharynx_Broad      | Oropharynx_Broad      |
|                      |                       | Pancreas              | Pancreas              |
|                      |                       | Prostate              |                       |

|  |         |         |        |
|--|---------|---------|--------|
|  |         | Testis  | Testis |
|  | Thyroid | Thyroid |        |



Supplementary Table S13: Correlation Matrix for Common Cancers  
With Selected Substances – Pearson Correlation Coefficients

| All<br>Cancer<br>s<br>nNMS<br>C | Breast  | Colorectum | Lung   | Non-<br>Hodgkin<br>s<br>lymphoma | Prostate | Tobacco | Alcohol | Last_Month_Cann | Daily_Cannabis | Herb_THC | Resin_THC | Amphetamines | Cocaine |
|---------------------------------|---------|------------|--------|----------------------------------|----------|---------|---------|-----------------|----------------|----------|-----------|--------------|---------|
| 1                               | 0.6151  | 0.2717     | 0.7955 | 0.6784                           | 0.7808   | 0.2665  | 0.3290  | -0.0725         | 0.2030         | 0.4928   | 0.2267    | -0.0724      | 0.1550  |
| 0.6151                          | 1       | 0.1515     | 0.3799 | 0.4535                           | 0.5125   | -0.0857 | 0.1049  | -0.0246         | 0.1206         | 0.5164   | 0.3911    | -0.0912      | 0.0687  |
| 0.2717                          | 0.1515  | 1          | 0.1132 | 0.1943                           | 0.1615   | -0.0518 | 0.0187  | 0.2520          | -0.3660        | 0.0170   | -0.1862   | -0.0516      | 0.2456  |
| 0.7955                          | 0.3799  | 0.1132     | 1      | 0.4543                           | 0.4919   | 0.3712  | 0.4025  | 0.4409          | 0.0686         | 0.4485   | 0.2139    | 0.1519       | -0.1549 |
| 0.6784                          | 0.4535  | 0.1943     | 0.4543 | 1                                | 0.4003   | -0.0742 | 0.0385  | -0.1226         | 0.3533         | 0.3340   | 0.2397    | -0.0844      | 0.3519  |
| 0.7808                          | 0.5125  | 0.1615     | 0.4919 | 0.4003                           | 1        | 0.3358  | 0.4780  | -0.3917         | 0.0231         | 0.4754   | 0.1893    | -0.4060      | -0.3247 |
| 0.2665                          | -0.0857 | -0.0518    | 0.3712 | -0.0742                          | 0.3358   | 1       | 0.6836  | 0.2197          | -0.5526        | -0.0721  | -0.3106   | -0.5273      | -0.7240 |
| 0.3290                          | 0.1049  | 0.0187     | 0.4025 | 0.0385                           | 0.4780   | 0.6836  | 1       | 0.3587          | -0.5916        | 0.2561   | -0.1407   | -0.0774      | -0.7920 |
| -0.0725                         | 0.0246  | 0.2520     | 0.4409 | -0.1226                          | -0.3917  | 0.2197  | 0.3587  | 1               | 0.1014         | -0.2927  | -0.2926   | 0.2801       | 0.0697  |
| 0.2030                          | 0.1206  | -0.3660    | 0.0686 | 0.3533                           | 0.0231   | -0.5526 | -0.5916 | 0.1014          | 1              | 0.1154   | 0.6512    | 0.2028       | 0.7795  |
| 0.4928                          | 0.5164  | 0.0170     | 0.4485 | 0.3340                           | 0.4754   | -0.0721 | 0.2561  | -0.2927         | 0.1154         | 1        | 0.7347    | 0.4083       | -0.1574 |
| 0.2267                          | 0.3911  | -0.1862    | 0.2139 | 0.2397                           | 0.1893   | -0.3106 | -0.1407 | -0.2926         | 0.6512         | 0.7347   | 1         | 0.2118       | -0.0674 |

|         |                 |         |                 |         |         |         |         |        |        |         |         |        |        |
|---------|-----------------|---------|-----------------|---------|---------|---------|---------|--------|--------|---------|---------|--------|--------|
| -0.0724 | -<br>0.091<br>2 | -0.0516 | 0.151<br>9      | -0.0844 | -0.4060 | -0.5273 | -0.0774 | 0.2801 | 0.2028 | 0.4083  | 0.2118  | 1      | 0.2415 |
| 0.1550  | 0.068<br>7      | 0.2456  | -<br>0.154<br>9 | 0.3519  | -0.3247 | -0.7240 | -0.7920 | 0.0697 | 0.7795 | -0.1574 | -0.0674 | 0.2415 | 1      |

Supplementary Table S14: Correlation Matrix for Common Cancers  
With Selected Substances – Significance Levels (P-Values) of Correlation Coefficients

| Parameter                | All Cancers<br>nMSC | Breast | Colorectum | Lung   | Non-Hodgkins<br>lymphoma | Prostate  | Tobacco | Alcohol | Last_Month_Cann | Daily_Cannabis | Herb_THC | Resin_THC | Amphetamines | Cocaine |
|--------------------------|---------------------|--------|------------|--------|--------------------------|-----------|---------|---------|-----------------|----------------|----------|-----------|--------------|---------|
| All Cancers<br>nMSC      | 0                   | 0.0000 | 0.0000     | 0.0000 | 0.0000                   | 5.22e-313 | 0.0000  | 0.0000  | 0.2738          | 0.0100         | 0.0000   | 0.0000    | 0.0890       | 0.0000  |
| Breast                   | 0.0000              | 0      | 0.0000     | 0.0000 | 0.0000                   | 0.0000    | 0.0003  | 0.0000  | 0.6494          | 0.0574         | 0.0000   | 0.0000    | 0.0142       | 0.0198  |
| Colorectum               | 0.0000              | 0.0000 | 0          | 0.0000 | 0.0000                   | 0.0000    | 0.0293  | 0.4311  | 0.0000          | 0.0000         | 0.5044   | 0.0000    | 0.1618       | 0.0000  |
| Lung                     | 0.0000              | 0.0000 | 0.0000     | 0      | 0.0000                   | 0.0000    | 0.0000  | 0.0000  | 0.0000          | 0.2807         | 0.0000   | 0.0000    | 0.0000       | 0.0000  |
| Non-Hodgkins<br>lymphoma | 0.0000              | 0.0000 | 0.0000     | 0.0000 | 0                        | 0.0000    | 0.0021  | 0.1113  | 0.0233          | 0.0000         | 0.0000   | 0.0000    | 0.0280       | 0.0000  |
| Prostate                 | 5.26E-313           | 0.0000 | 0.0000     | 0.0000 | 0.0000                   | 0         | 0.0000  | 0.0000  | 0.0000          | 0.7163         | 0.0000   | 0.0000    | 0.0000       | 0.0000  |
| Tobacco                  | 0.0000              | 0.0003 | 0.0293     | 0.0000 | 0.0021                   | 0.0000    | 0       | 0.0000  | 0.0000          | 0.0000         | 0.0045   | 0.0000    | 0.0000       | 0.0000  |
| Alcohol                  | 0.0000              | 0.0000 | 0.4311     | 0.0000 | 0.1113                   | 0.0000    | 0.0000  | 0       | 0.0000          | 0.0000         | 0.0000   | 0.0000    | 0.0357       | 0.0000  |
| Last_Month_Cann          | 0.2738              | 0.6494 | 0.0000     | 0.0000 | 0.0233                   | 0.0000    | 0.0000  | 0.0000  | 0               | 0.1106         | 0.0000   | 0.0000    | 0.0000       | 0.2106  |
| Daily_Cannabis           | 0.0100              | 0.0574 | 0.0000     | 0.2807 | 0.0000                   | 0.7163    | 0.0000  | 0.0000  | 0.1106          | 0              | 0.0923   | 0.0000    | 0.0013       | 0.0000  |
| Herb_THC                 | 0.0000              | 0.0000 | 0.5044     | 0.0000 | 0.0000                   | 0.0000    | 0.0045  | 0.0000  | 0.0000          | 0.0923         | 0        | 0.0000    | 0.0000       | 0.0000  |
| Resin_THC                | 0.0000              | 0.0000 | 0.0000     | 0.0000 | 0.0000                   | 0.0000    | 0.0000  | 0.0000  | 0.0000          | 0.0000         | 0.0000   | 0         | 0.0000       | 0.0330  |

|                     |        |        |        |        |        |        |        |        |        |        |        |        |        |        |
|---------------------|--------|--------|--------|--------|--------|--------|--------|--------|--------|--------|--------|--------|--------|--------|
| <b>Amphetamines</b> | 0.0890 | 0.0142 | 0.1618 | 0.0000 | 0.0280 | 0.0000 | 0.0000 | 0.0357 | 0.0000 | 0.0013 | 0.0000 | 0.0000 | 0      | 0.0000 |
| <b>Cocaine</b>      | 0.0000 | 0.0198 | 0.0000 | 0.0000 | 0.0000 | 0.0000 | 0.0000 | 0.0000 | 0.2106 | 0.0000 | 0.0000 | 0.0330 | 0.0000 | 0      |

Supplementary Table S15: Correlation Matrix for Common Cancers  
With Selected Substances – Numbers of Observations Pertaining to Each Cell

| Parameter                | All Cancers<br>nNMSC | Breast | Colorectum | Lung | Non-Hodgkins<br>lymphoma | Prostate | Tobacco | Alcohol | Last_Month_<br>Cann | Daily_Cannabis | Herb_THC | Resin_THC | Amphetamines | Cocaine |
|--------------------------|----------------------|--------|------------|------|--------------------------|----------|---------|---------|---------------------|----------------|----------|-----------|--------------|---------|
| All Cancers<br>nNMSC     | 1523                 | 1503   | 1523       | 1503 | 1520                     | 1523     | 1522    | 1522    | 230                 | 160            | 1375     | 1325      | 553          | 965     |
| Breast                   | 1503                 | 1738   | 1738       | 1738 | 1693                     | 1738     | 1737    | 1737    | 345                 | 249            | 1540     | 1484      | 723          | 1149    |
| Colorectum               | 1523                 | 1738   | 1771       | 1771 | 1713                     | 1771     | 1770    | 1770    | 345                 | 249            | 1553     | 1497      | 736          | 1162    |
| Lung                     | 1503                 | 1738   | 1751       | 1751 | 1693                     | 1751     | 1750    | 1750    | 345                 | 249            | 1553     | 1497      | 736          | 1162    |
| Non-Hodgkins<br>lymphoma | 1520                 | 1693   | 1713       | 1713 | 1693                     | 1713     | 1712    | 1712    | 342                 | 246            | 1495     | 1439      | 678          | 1104    |
| Prostate                 | 1523                 | 1738   | 1771       | 1771 | 1713                     | 1771     | 1770    | 1770    | 345                 | 249            | 1553     | 1497      | 736          | 1162    |
| Tobacco                  | 1522                 | 1737   | 1770       | 1770 | 1712                     | 1770     | 1770    | 1770    | 345                 | 249            | 1553     | 1497      | 736          | 1162    |
| Alcohol                  | 1522                 | 1737   | 1770       | 1770 | 1712                     | 1770     | 1770    | 1770    | 345                 | 249            | 1553     | 1497      | 736          | 1162    |
| Last_Month_<br>Cann      | 230                  | 345    | 345        | 345  | 342                      | 345      | 345     | 345     | 345                 | 249            | 309      | 247       | 297          | 324     |
| Daily_Cannabis           | 160                  | 249    | 249        | 249  | 246                      | 249      | 249     | 249     | 249                 | 249            | 214      | 192       | 248          | 249     |
| Herb_THC                 | 1375                 | 1540   | 1553       | 1553 | 1495                     | 1553     | 1553    | 1553    | 309                 | 214            | 1553     | 1477      | 651          | 1057    |

|                     |      |      |      |          |      |      |      |      |     |     |      |      |     |      |
|---------------------|------|------|------|----------|------|------|------|------|-----|-----|------|------|-----|------|
| <b>Resin_THC</b>    | 1325 | 1484 | 1497 | 149<br>7 | 1439 | 1497 | 1497 | 1497 | 247 | 192 | 1477 | 1497 | 603 | 1001 |
| <b>Amphetamines</b> | 553  | 723  | 736  | 736      | 678  | 736  | 736  | 736  | 297 | 248 | 651  | 603  | 736 | 736  |
| <b>Cocaine</b>      | 965  | 1149 | 1162 | 116<br>2 | 1104 | 1162 | 1162 | 1162 | 324 | 249 | 1057 | 1001 | 736 | 1162 |

Supplementary Table S16.: Ranking of Countries by Mean Tobacco Usage

| Rank | Country        | Mean Tobacco Consumption Annually |
|------|----------------|-----------------------------------|
| 1    | Bulgaria       | 43.78                             |
| 2    | Austria        | 40.78                             |
| 3    | Latvia         | 40.37                             |
| 4    | Estonia        | 37.45                             |
| 5    | Lithuania      | 34.04                             |
| 6    | France         | 33.93                             |
| 7    | Spain          | 33.24                             |
| 8    | Czechia        | 32.74                             |
| 9    | Sweden         | 31.93                             |
| 10   | Hungary        | 31.79                             |
| 11   | Poland         | 31.43                             |
| 12   | Romania        | 31.12                             |
| 13   | Germany        | 30.19                             |
| 14   | Norway         | 28.42                             |
| 15   | Netherlands    | 27.96                             |
| 16   | Ireland        | 27.70                             |
| 17   | Belgium        | 27.42                             |
| 18   | Finland        | 27.38                             |
| 19   | United Kingdom | 27.32                             |
| 20   | Denmark        | 25.59                             |
| 21   | Portugal       | 25.37                             |
| 22   | Italy          | 25.00                             |
| 23   | Iceland        | 20.04                             |
| 24   | Luxembourg     | -                                 |

Supplementary Table S17.: Numbers of Cumulative Exposed and Non-Exposed People in High and Low Tobacco using Countries Respectively and Applicable E-Values

- See also Table 6

| Cancer            | Mean ASRw High Nations | Mean ASRw Low Nations | Case Numbers in High Countries | Case Numbers in Low Countries | No.'s Non-Cases in High Countries | No.'s Non-Cases in Low Countries | E-Value Estimate | 95% Lower Bound of E-Value |
|-------------------|------------------------|-----------------------|--------------------------------|-------------------------------|-----------------------------------|----------------------------------|------------------|----------------------------|
| Oropharynx        | 7.674                  | 2.116                 | 282280                         | 123174                        | 3.68E+09                          | 5.82E+09                         | 6.71             | 6.67                       |
| Cervix            | 14.291                 | 7.159                 | 3851494                        | 3105343                       | 2.69E+10                          | 4.34E+10                         | 3.41             | 3.40                       |
| Stomach           | 16.058                 | 8.803                 | 4598574                        | 3818352                       | 2.86E+10                          | 4.34E+10                         | 3.05             | 3.05                       |
| Kidney            | 14.244                 | 8.105                 | 4079247                        | 3515636                       | 2.86E+10                          | 4.34E+10                         | 2.91             | 2.91                       |
| Prostate          | 114.961                | 70.372                | 31303652                       | 30524234                      | 2.72E+10                          | 4.33E+10                         | 2.65             | 2.65                       |
| Pancreas          | 11.701                 | 7.308                 | 3350836                        | 3170031                       | 2.86E+10                          | 4.34E+10                         | 2.58             | 2.58                       |
| Corpus Uteri      | 19.558                 | 12.387                | 5325659                        | 5780667                       | 2.72E+10                          | 4.67E+10                         | 2.53             | 2.53                       |
| Leukaemia         | 11.408                 | 7.277                 | 2622253                        | 3256530                       | 2.30E+10                          | 4.47E+10                         | 2.51             | 2.51                       |
| All Cancers       | 522.451                | 343.838               | 33237845                       | 17622587                      | 6.33E+09                          | 5.11E+09                         | 2.41             | 2.41                       |
| Ovary             | 14.008                 | 9.366                 | 3775222                        | 4062447                       | 2.69E+10                          | 4.34E+10                         | 2.36             | 2.35                       |
| Larynx            | 4.654                  | 3.203                 | 1332667                        | 1348837                       | 2.86E+10                          | 4.21E+10                         | 2.26             | 2.26                       |
| Lung              | 44.077                 | 30.566                | 12002011                       | 12872940                      | 2.72E+10                          | 4.21E+10                         | 2.24             | 2.24                       |
| Oesophagus        | 4.594                  | 3.463                 | 1315587                        | 1501983                       | 2.86E+10                          | 4.34E+10                         | 1.98             | 1.98                       |
| All Cancers nNMSC | 386.008                | 294.903               | 84876190                       | 116392051                     | 2.19E+10                          | 3.94E+10                         | 1.94             | 1.94                       |
| Oropharynx_Broad  | 14.240                 | 10.986                | 519477                         | 309620                        | 3.65E+09                          | 2.82E+09                         | 1.92             | 1.90                       |
| Brain             | 6.596                  | 6.299                 | 1777663                        | 2732158                       | 2.69E+10                          | 4.34E+10                         | 1.27             | 1.26                       |
| Colorectum        | 60.428                 | 58.058                | 16523277                       | 25360673                      | 2.73E+10                          | 4.37E+10                         | 1.25             | 1.24                       |
| Breast            | 79.880                 | 77.700                | 22111875                       | 32974891                      | 2.77E+10                          | 4.24E+10                         | 1.20             | 1.20                       |
| Liver             | 6.064                  | 5.991                 | 1705853                        | 2505349                       | 2.81E+10                          | 4.18E+10                         | 1.12             | 1.11                       |
| Bladder           | 14.602                 | 14.473                | 4181692                        | 6277827                       | 2.86E+10                          | 4.34E+10                         | 1.10             | 1.10                       |
| Hepatocellular    | 1.440                  | 1.316                 | 611                            | 5848                          | 4.25E+07                          | 4.44E+08                         | 1.41             | 1.09                       |



|                       |        |        |         |         |          |          |      |   |
|-----------------------|--------|--------|---------|---------|----------|----------|------|---|
| Penis                 | 0.864  | 0.881  | 201803  | 381933  | 2.34E+10 | 4.34E+10 | 1.16 | - |
| Melanoma              | 10.883 | 11.282 | 2970124 | 4893660 | 2.73E+10 | 4.34E+10 | 1.23 | - |
| Gallbladder & Biliary | 2.191  | 2.334  | 489894  | 986629  | 2.24E+10 | 4.23E+10 | 1.33 | - |
| Leukaemia - Lymphoid  | 3.872  | 4.205  | 223530  | 204699  | 5.77E+09 | 4.87E+09 | 1.39 | - |
| Hodgkins              | 2.595  | 2.869  | 729933  | 1289326 | 2.81E+10 | 4.49E+10 | 1.45 | - |
| Anus                  | 0.739  | 0.846  | 204788  | 367078  | 2.77E+10 | 4.34E+10 | 1.55 | - |
| Thyroid               | 6.715  | 7.878  | 1888902 | 3417217 | 2.81E+10 | 4.34E+10 | 1.62 | - |
| Myeloma               | 2.896  | 3.446  | 812819  | 1494844 | 2.81E+10 | 4.34E+10 | 1.67 | - |
| Testis                | 5.433  | 6.745  | 1436624 | 2925877 | 2.64E+10 | 4.34E+10 | 1.79 | - |
| Non-Hodgkins lymphoma | 8.885  | 11.068 | 2007179 | 4800778 | 2.26E+10 | 4.34E+10 | 1.80 | - |
| Vulva & Vagina        | 0.944  | 1.209  | 208408  | 486139  | 2.21E+10 | 4.02E+10 | 1.88 | - |
| Vagina                | 0.268  | 0.381  | 3604    | 19828   | 1.34E+09 | 5.20E+09 | 2.20 | - |
| Leukaemia - Myeloid   | 1.455  | 2.279  | 85599   | 110922  | 5.88E+09 | 4.87E+09 | 2.51 | - |
| Vulva                 | 1.070  | 1.810  | 14542   | 94156   | 1.36E+09 | 5.20E+09 | 2.77 | - |

Supplementary Table S18: Ranking of Nations for  
Annual Average Alcohol Consumption

| Rank | Country        | Annual Mean<br>Alcohol<br>Consumption<br>(Litres) |
|------|----------------|---------------------------------------------------|
| 1    | Czechia        | 14.47                                             |
| 2    | Lithuania      | 14.46                                             |
| 3    | Romania        | 13.54                                             |
| 4    | Ireland        | 13.39                                             |
| 5    | Germany        | 13.36                                             |
| 6    | Estonia        | 13.16                                             |
| 7    | Portugal       | 13.07                                             |
| 8    | France         | 12.92                                             |
| 9    | Austria        | 12.55                                             |
| 10   | United Kingdom | 11.81                                             |
| 11   | Belgium        | 11.71                                             |
| 12   | Finland        | 11.70                                             |
| 13   | Spain          | 11.62                                             |
| 14   | Bulgaria       | 11.47                                             |
| 15   | Denmark        | 11.22                                             |
| 16   | Poland         | 11.03                                             |
| 17   | Hungary        | 10.64                                             |
| 18   | Latvia         | 10.47                                             |
| 19   | Netherlands    | 10.30                                             |
| 20   | Sweden         | 9.03                                              |
| 21   | Italy          | 8.17                                              |
| 22   | Iceland        | 8.04                                              |
| 23   | Norway         | 7.35                                              |
| 24   | Luxembourg     | -                                                 |

Supplementary Table S19.: Numbers of Cumulative Exposed and Non-Exposed People in High and Low Alcohol Consuming Countries Respectively and Applicable E-Values

- See also Supplementary Table S20

| Cancer            | Mean ASRw High Nations | Mean ASRw Low Nations | Case Numbers in High Countries | Case Numbers in Low Countries | No.'s Non-Cases in High Countries | No.'s Non-Cases in Low Countries | E-Value Estimate | 95% Lower Bound of E-Value |
|-------------------|------------------------|-----------------------|--------------------------------|-------------------------------|-----------------------------------|----------------------------------|------------------|----------------------------|
| Oropharynx_Broad  | 14.442                 | 6.059                 | 880554                         | 22375                         | 6.10E+09                          | 3.69E+08                         | 4.20             | 4.14                       |
| Cervix            | 15.026                 | 6.592                 | 4638488                        | 2600841                       | 3.09E+10                          | 3.95E+10                         | 3.99             | 3.98                       |
| Oesophagus        | 5.455                  | 2.652                 | 1775988                        | 1046404                       | 3.26E+10                          | 3.95E+10                         | 3.53             | 3.52                       |
| Kidney            | 14.955                 | 7.525                 | 4868863                        | 2969084                       | 3.26E+10                          | 3.95E+10                         | 3.39             | 3.38                       |
| Stomach           | 16.438                 | 8.561                 | 5351526                        | 3377806                       | 3.26E+10                          | 3.95E+10                         | 3.25             | 3.24                       |
| Prostate          | 120.720                | 66.030                | 37265161                       | 26237487                      | 3.08E+10                          | 3.97E+10                         | 3.06             | 3.06                       |
| All Cancers       | 534.641                | 301.414               | 48319880                       | 7382700                       | 8.99E+09                          | 2.44E+09                         | 2.95             | 2.94                       |
| Pancreas          | 12.210                 | 6.893                 | 3975104                        | 2719639                       | 3.26E+10                          | 3.95E+10                         | 2.94             | 2.93                       |
| Ovary             | 14.787                 | 8.714                 | 4564704                        | 3438419                       | 3.09E+10                          | 3.95E+10                         | 2.78             | 2.78                       |
| Leukaemia         | 11.807                 | 7.010                 | 3344005                        | 2762772                       | 2.83E+10                          | 3.94E+10                         | 2.76             | 2.75                       |
| Lung              | 45.844                 | 29.535                | 13573877                       | 11735845                      | 2.96E+10                          | 3.97E+10                         | 2.48             | 2.48                       |
| Corpus Uteri      | 19.282                 | 12.524                | 6438382                        | 5073017                       | 3.34E+10                          | 4.05E+10                         | 2.45             | 2.45                       |
| Anus              | 1.006                  | 0.690                 | 321632                         | 269829                        | 3.20E+10                          | 3.91E+10                         | 2.28             | 2.26                       |
| All Cancers nNMSC | 405.170                | 280.903               | 97380651                       | 105118389                     | 2.39E+10                          | 3.73E+10                         | 2.24             | 2.24                       |
| Vulva             | 2.019                  | 1.437                 | 91229                          | 29330                         | 4.52E+09                          | 2.04E+09                         | 2.16             | 2.12                       |
| Oropharynx        | 3.803                  | 2.875                 | 252846                         | 81979                         | 6.65E+09                          | 2.85E+09                         | 1.98             | 1.95                       |
| Melanoma          | 12.604                 | 9.652                 | 3933886                        | 3808515                       | 3.12E+10                          | 3.95E+10                         | 1.94             | 1.93                       |
| Breast            | 87.807                 | 71.223                | 26228450                       | 28666703                      | 2.98E+10                          | 4.02E+10                         | 1.77             | 1.77                       |
| Vagina            | 0.415                  | 0.328                 | 18695                          | 6703                          | 4.50E+09                          | 2.04E+09                         | 1.84             | 1.76                       |
| Testis            | 7.036                  | 5.829                 | 2136444                        | 2299738                       | 3.04E+10                          | 3.95E+10                         | 1.71             | 1.70                       |

|                       |        |        |          |          |          |          |      |      |
|-----------------------|--------|--------|----------|----------|----------|----------|------|------|
| Leukaemia - Lymphoid  | 4.500  | 3.774  | 384464   | 79188    | 8.54E+09 | 2.10E+09 | 1.67 | 1.65 |
| Leukaemia - Myeloid   | 2.179  | 1.826  | 187619   | 39103    | 8.61E+09 | 2.14E+09 | 1.67 | 1.64 |
| Vulva & Vagina        | 1.228  | 1.061  | 299806   | 401826   | 2.44E+10 | 3.79E+10 | 1.58 | 1.57 |
| Non-Hodgkins lymphoma | 11.169 | 9.895  | 2960744  | 3904069  | 2.65E+10 | 3.95E+10 | 1.51 | 1.51 |
| Larynx                | 4.118  | 3.762  | 1288744  | 1484425  | 3.13E+10 | 3.95E+10 | 1.42 | 1.41 |
| Colorectum            | 61.624 | 56.994 | 19190460 | 22731571 | 3.11E+10 | 3.99E+10 | 1.38 | 1.38 |
| Myeloma               | 3.397  | 3.145  | 1086387  | 1240974  | 3.20E+10 | 3.95E+10 | 1.37 | 1.37 |
| Penis                 | 0.902  | 0.861  | 249423   | 336389   | 2.77E+10 | 3.91E+10 | 1.27 | 1.25 |
| Brain                 | 6.568  | 6.331  | 2027388  | 2497820  | 3.09E+10 | 3.95E+10 | 1.23 | 1.23 |
| Hodgkins              | 2.572  | 2.883  | 864543   | 1137703  | 3.36E+10 | 3.95E+10 | 1.49 | NA   |
| Hepatocellular        | 1.207  | 1.432  | 1130     | 5633     | 9.36E+07 | 3.93E+08 | 1.66 | NA   |
| Liver                 | 5.317  | 6.416  | 1621229  | 2531429  | 3.05E+10 | 3.95E+10 | 1.71 | NA   |
| Thyroid               | 6.492  | 7.988  | 2080789  | 3151859  | 3.20E+10 | 3.95E+10 | 1.76 | NA   |
| Gallbladder & Biliary | 1.969  | 2.466  | 521955   | 940325   | 2.65E+10 | 3.81E+10 | 1.81 | NA   |
| Bladder               | 12.554 | 16.449 | 4087242  | 6490250  | 3.26E+10 | 3.95E+10 | 1.95 | NA   |

Supplementary Table S20.: Relative Risks, Attributable Fractions in the Exposed and Population Attributable Risks  
For High and Low Alcohol Exposure Nations Respectively

| Cancer                | P_Value   | RR_C.I.                 | AfE_C.I.                | PAF_C.I.                |
|-----------------------|-----------|-------------------------|-------------------------|-------------------------|
| Oropharynx_Broad      | 0.00E+00  | 2.3835 (2.3521, 2.4154) | 0.5805 (0.5748, 0.586)  | 0.5661 (0.5604, 0.5716) |
| Cervix                | 0.00E+00  | 2.2796 (2.2761, 2.2831) | 0.5613 (0.5607, 0.562)  | 0.3597 (0.359, 0.3603)  |
| Oesophagus            | 0.00E+00  | 2.0569 (2.052, 2.0619)  | 0.5138 (0.5127, 0.515)  | 0.3233 (0.3223, 0.3244) |
| Kidney                | 0.00E+00  | 1.9874 (1.9845, 1.9903) | 0.4968 (0.4961, 0.4976) | 0.3086 (0.308, 0.3092)  |
| Stomach               | 0.00E+00  | 1.9201 (1.9175, 1.9227) | 0.4792 (0.4785, 0.4799) | 0.2938 (0.2932, 0.2944) |
| Prostate              | 0.00E+00  | 1.8283 (1.8273, 1.8292) | 0.453 (0.4528, 0.4533)  | 0.2659 (0.2656, 0.2661) |
| All Cancers           | 0.00E+00  | 1.7738 (1.7724, 1.7751) | 0.4362 (0.4358, 0.4367) | 0.3784 (0.378, 0.3788)  |
| Pancreas              | 0.00E+00  | 1.7714 (1.7687, 1.7741) | 0.4355 (0.4346, 0.4363) | 0.2586 (0.2579, 0.2592) |
| Ovary                 | 0.00E+00  | 1.6969 (1.6945, 1.6992) | 0.4107 (0.4099, 0.4115) | 0.2342 (0.2336, 0.2348) |
| Leukaemia             | 0.00E+00  | 1.6844 (1.6817, 1.6871) | 0.4063 (0.4054, 0.4073) | 0.2225 (0.2218, 0.2232) |
| Lung                  | 0.00E+00  | 1.5522 (1.551, 1.5534)  | 0.3558 (0.3553, 0.3563) | 0.1908 (0.1905, 0.1911) |
| Corpus Uteri          | 0.00E+00  | 1.5396 (1.5378, 1.5414) | 0.3505 (0.3497, 0.3512) | 0.196 (0.1955, 0.1965)  |
| Anus                  | 0.00E+00  | 1.459 (1.4516, 1.4665)  | 0.3146 (0.3111, 0.3181) | 0.1711 (0.1688, 0.1734) |
| All Cancers nNMSC     | 0.00E+00  | 1.4424 (1.442, 1.4428)  | 0.3067 (0.3065, 0.3069) | 0.1475 (0.1474, 0.1476) |
| Vulva                 | 0.00E+00  | 1.405 (1.3867, 1.4236)  | 0.2883 (0.2788, 0.2976) | 0.2181 (0.2103, 0.2259) |
| Oropharynx            | 0.00E+00  | 1.323 (1.3126, 1.3335)  | 0.2441 (0.2382, 0.2501) | 0.1844 (0.1795, 0.1892) |
| Melanoma              | 0.00E+00  | 1.3058 (1.304, 1.3076)  | 0.2342 (0.2331, 0.2353) | 0.119 (0.1184, 0.1196)  |
| Breast                | 0.00E+00  | 1.2329 (1.2322, 1.2335) | 0.1889 (0.1884, 0.1893) | 0.0902 (0.09, 0.0905)   |
| Vagina                | 2.19E-61  | 1.2639 (1.2291, 1.2997) | 0.2088 (0.1864, 0.2306) | 0.1537 (0.1361, 0.1709) |
| Testis                | 0.00E+00  | 1.2072 (1.205, 1.2095)  | 0.1717 (0.1701, 0.1732) | 0.0827 (0.0819, 0.0835) |
| Leukaemia - Lymphoid  | 0.00E+00  | 1.1926 (1.1835, 1.2017) | 0.1615 (0.155, 0.1679)  | 0.1339 (0.1284, 0.1394) |
| Leukaemia - Myeloid   | 3.85E-222 | 1.1931 (1.1801, 1.2061) | 0.1618 (0.1526, 0.1709) | 0.1339 (0.1261, 0.1417) |
| Vulva & Vagina        | 0.00E+00  | 1.1573 (1.1519, 1.1628) | 0.1359 (0.1318, 0.14)   | 0.0581 (0.0562, 0.06)   |
| Non-Hodgkins lymphoma | 0.00E+00  | 1.1288 (1.1271, 1.1305) | 0.1141 (0.1128, 0.1154) | 0.0492 (0.0486, 0.0498) |
| Larynx                | 0.00E+00  | 1.0946 (1.092, 1.0971)  | 0.0864 (0.0842, 0.0885) | 0.0401 (0.0391, 0.0412) |

|                       |          |                         |                            |                            |
|-----------------------|----------|-------------------------|----------------------------|----------------------------|
| Colorectum            | 0.00E+00 | 1.0812 (1.0806, 1.0819) | 0.0751 (0.0746, 0.0757)    | 0.0344 (0.0341, 0.0347)    |
| Myeloma               | 0.00E+00 | 1.08 (1.0772, 1.0828)   | 0.0741 (0.0717, 0.0765)    | 0.0346 (0.0334, 0.0357)    |
| Penis                 | 1.82E-70 | 1.0479 (1.0425, 1.0533) | 0.0457 (0.0408, 0.0506)    | 0.0195 (0.0173, 0.0216)    |
| Brain                 | 0.00E+00 | 1.0375 (1.0355, 1.0394) | 0.0361 (0.0343, 0.0379)    | 0.0162 (0.0154, 0.017)     |
| Hodgkins              | 0.00E+00 | 0.8922 (0.8897, 0.8947) | -0.1209 (-0.124, -0.1178)  | -0.0522 (-0.0535, -0.0509) |
| Hepatocellular        | 7.63E-08 | 0.8429 (0.7907, 0.8985) | -0.1864 (-0.2646, -0.113)  | -0.0311 (-0.0422, -0.0202) |
| Liver                 | 0.00E+00 | 0.8287 (0.8271, 0.8304) | -0.2067 (-0.209, -0.2043)  | -0.0807 (-0.0815, -0.0799) |
| Thyroid               | 0.00E+00 | 0.8127 (0.8113, 0.8142) | -0.2304 (-0.2325, -0.2282) | -0.0916 (-0.0924, -0.0909) |
| Gallbladder & Biliary | 0.00E+00 | 0.7984 (0.7957, 0.8011) | -0.2525 (-0.2568, -0.2483) | -0.0901 (-0.0914, -0.0888) |
| Bladder               | 0.00E+00 | 0.7632 (0.7623, 0.7642) | -0.3102 (-0.3119, -0.3086) | -0.1199 (-0.1204, -0.1193) |

Supplementary Table S21: Ranking of Nations for  
Cannabis Consumption

| Rank | Country        | Mean Last Month Cannabis Use | Mean Daily Cannabis Use (%) | Mean THC Content Cannabis Herb | Mean THC Content Cannabis Resin |
|------|----------------|------------------------------|-----------------------------|--------------------------------|---------------------------------|
| 1    | Belgium        | 0.0460                       | 0.0132                      | 0.1263                         | 0.1513                          |
| 2    | Norway         | 0.0089                       | 0.0045                      | 0.1200                         | 0.2500                          |
| 3    | Hungary        | 0.0152                       | 0.0017                      | 0.1139                         | 0.2207                          |
| 4    | Germany        | 0.0397                       | 0.0027                      | 0.1060                         | 0.0396                          |
| 5    | Estonia        | 0.0265                       | -                           | 0.0975                         | 0.0482                          |
| 6    | Romania        | 0.0032                       | -                           | 0.0777                         | 0.0408                          |
| 7    | France         | 0.0470                       | 0.0150                      | 0.0746                         | 0.0881                          |
| 8    | Austria        | -                            | -                           | 0.0697                         | 0.0668                          |
| 9    | Poland         | 0.0521                       | 0.0040                      | 0.0648                         | -                               |
| 10   | Sweden         | 0.0099                       | -                           | 0.0604                         | 0.1228                          |
| 11   | Netherlands    | 0.0433                       | 0.0077                      | 0.0590                         | 0.2695                          |
| 12   | Ireland        | 0.0417                       | -                           | 0.0570                         | 0.0237                          |
| 13   | Italy          | -                            | -                           | 0.0538                         | 0.0246                          |
| 14   | Czechia        | 0.0451                       | -                           | 0.0448                         | 0.0541                          |
| 15   | Finland        | 0.0174                       | 0.0032                      | 0.0402                         | -                               |
| 16   | Bulgaria       | -                            | -                           | 0.0336                         | 0.0090                          |
| 17   | Portugal       | -                            | -                           | 0.0271                         | 0.0368                          |
| 18   | Spain          | 0.0773                       | 0.0285                      | 0.0038                         | 0.0080                          |
| 19   | Denmark        | 0.0270                       | 0.0047                      | -                              | 0.2663                          |
| 20   | Iceland        | -                            | -                           | -                              | -                               |
| 21   | Latvia         | 0.0175                       | 0.0019                      | -                              | -                               |
| 22   | Lithuania      | -                            | -                           | -                              | -                               |
| 23   | Luxembourg     | -                            | -                           | -                              | -                               |
| 24   | United Kingdom | -                            | -                           | -                              | -                               |

Supplementary Table 22.: Numbers of Cumulative Exposed and Non-Exposed People in High and Low Alcohol Consuming Countries Respectively and Applicable E-Values  
See also Table 7

| <b>Cancer</b>         | <b>Mean ASRw High Nations</b> | <b>Mean ASRw Low Nations</b> | <b>Case Numbers in High Countries</b> | <b>Case Numbers in Low Countries</b> | <b>No.'s Non-Cases in High Countries</b> | <b>No.'s Non-Cases in Low Countries</b> | <b>E-Value Estimate</b> | <b>95% Lower Bound of E-Value</b> |
|-----------------------|-------------------------------|------------------------------|---------------------------------------|--------------------------------------|------------------------------------------|-----------------------------------------|-------------------------|-----------------------------------|
| Kaposi                | 0.286                         | 0.138                        | 2728                                  | 2780                                 | 9.54E+08                                 | 2.02E+09                                | 3.58                    | 3.36                              |
| Liver                 | 6.529                         | 3.704                        | 4121842                               | 252491                               | 6.31E+10                                 | 6.82E+09                                | 2.92                    | 2.91                              |
| Thyroid               | 8.022                         | 4.741                        | 5189225                               | 323166                               | 6.47E+10                                 | 6.82E+09                                | 2.77                    | 2.76                              |
| Stomach               | 13.198                        | 7.834                        | 8604632                               | 534040                               | 6.52E+10                                 | 6.82E+09                                | 2.76                    | 2.75                              |
| Oropharynx_Broad      | 14.490                        | 8.942                        | 746046                                | 117813                               | 5.15E+09                                 | 1.32E+09                                | 2.62                    | 2.60                              |
| Larynx                | 4.142                         | 2.604                        | 2700747                               | 144700                               | 6.52E+10                                 | 5.56E+09                                | 2.56                    | 2.54                              |
| Breast                | 83.392                        | 55.972                       | 53495071                              | 3342222                              | 6.41E+10                                 | 5.97E+09                                | 2.34                    | 2.34                              |
| All Cancers           | 490.514                       | 348.942                      | 44112136                              | 8703057                              | 8.95E+09                                 | 2.49E+09                                | 2.16                    | 2.16                              |
| Hodgkins              | 2.883                         | 2.220                        | 1910067                               | 151357                               | 6.62E+10                                 | 6.82E+09                                | 1.92                    | 1.91                              |
| Bladder               | 15.023                        | 11.649                       | 9794262                               | 794095                               | 6.52E+10                                 | 6.82E+09                                | 1.90                    | 1.89                              |
| Kidney                | 11.542                        | 8.968                        | 7524752                               | 611333                               | 6.52E+10                                 | 6.82E+09                                | 1.89                    | 1.89                              |
| Pancreas              | 9.816                         | 7.634                        | 6399767                               | 520382                               | 6.52E+10                                 | 6.82E+09                                | 1.89                    | 1.88                              |
| Prostate              | 95.394                        | 74.878                       | 60850273                              | 5104252                              | 6.37E+10                                 | 6.81E+09                                | 1.86                    | 1.86                              |
| Lung                  | 38.430                        | 30.249                       | 24513914                              | 1680712                              | 6.38E+10                                 | 5.55E+09                                | 1.86                    | 1.85                              |
| Leukaemia             | 9.514                         | 7.628                        | 5799676                               | 516775                               | 6.10E+10                                 | 6.77E+09                                | 1.80                    | 1.79                              |
| Colorectum            | 60.859                        | 49.941                       | 38968716                              | 3493087                              | 6.40E+10                                 | 6.99E+09                                | 1.73                    | 1.73                              |
| All Cancers nNMSC     | 348.385                       | 287.415                      | 193251354                             | 17203216                             | 5.53E+10                                 | 5.97E+09                                | 1.72                    | 1.72                              |
| Gallbladder & Biliary | 2.311                         | 2.084                        | 1364315                               | 116646                               | 5.90E+10                                 | 5.60E+09                                | 1.46                    | 1.44                              |
| Myeloma               | 3.295                         | 2.976                        | 2129158                               | 202843                               | 6.46E+10                                 | 6.82E+09                                | 1.45                    | 1.44                              |
| Leukaemia - Myeloid   | 2.043                         | 1.872                        | 168148                                | 47209                                | 8.23E+09                                 | 2.52E+09                                | 1.41                    | 1.38                              |



|                          |        |        |          |         |          |          |      |      |
|--------------------------|--------|--------|----------|---------|----------|----------|------|------|
| Leukaemia -<br>Lymphoid  | 4.210  | 3.896  | 343629   | 96614   | 8.16E+09 | 2.48E+09 | 1.38 | 1.35 |
| Corpus Uteri             | 15.895 | 14.915 | 10261549 | 1392771 | 6.45E+10 | 9.34E+09 | 1.33 | 1.32 |
| Cervix                   | 10.756 | 10.186 | 6831324  | 694366  | 6.35E+10 | 6.82E+09 | 1.30 | 1.29 |
| Testis                   | 6.304  | 6.069  | 3971392  | 413711  | 6.30E+10 | 6.82E+09 | 1.24 | 1.23 |
| Ovary                    | 11.694 | 11.414 | 7426766  | 778055  | 6.35E+10 | 6.82E+09 | 1.18 | 1.17 |
| Anus                     | 0.810  | 0.789  | 520516   | 53702   | 6.43E+10 | 6.80E+09 | 1.19 | 1.15 |
| Non-Hodgkins<br>lymphoma | 10.275 | 10.505 | 6077238  | 716083  | 5.91E+10 | 6.82E+09 | 1.17 | NA   |
| Melanoma                 | 11.013 | 11.506 | 7031931  | 784353  | 6.38E+10 | 6.82E+09 | 1.26 | NA   |
| Hepatocellular           | 1.316  | 1.440  | 5848     | 611     | 4.44E+08 | 4.25E+07 | 1.41 | NA   |
| Oesophagus               | 3.962  | 4.420  | 2582943  | 301328  | 6.52E+10 | 6.82E+09 | 1.48 | NA   |
| Brain                    | 6.202  | 7.873  | 3938697  | 536653  | 6.35E+10 | 6.82E+09 | 1.85 | NA   |
| Penis                    | 0.831  | 1.084  | 498381   | 73294   | 6.00E+10 | 6.76E+09 | 1.94 | NA   |
| Vulva                    | 1.568  | 2.183  | 68164    | 48326   | 4.35E+09 | 2.21E+09 | 2.13 | NA   |
| Vagina                   | 0.338  | 0.477  | 14683    | 10494   | 4.35E+09 | 2.20E+09 | 2.17 | NA   |
| Vulva & Vagina           | 1.032  | 1.481  | 582143   | 86830   | 5.64E+10 | 5.86E+09 | 2.23 | NA   |
| Oropharynx               | 2.682  | 4.262  | 184664   | 111456  | 6.89E+09 | 2.61E+09 | 2.56 | NA   |

Supplementary Table S23.: Complete Output from Additive Mixed Effects Regression

| Cancer               | Term        | $\beta$ -estimate | Std. Error | t-statistic | P-Value  | Sigma | logLik  | eValPtL   | eValLoL  |
|----------------------|-------------|-------------------|------------|-------------|----------|-------|---------|-----------|----------|
| All Cancers nNMSC    | LM.Cannabis | 15.369            | 2.052      | 7.491       | 1.52E-11 | 0.048 | 220.981 | 3.60E+126 | 3.86E+93 |
| All Cancers nNMSC    | THC.Herb    | 8.959             | 0.901      | 9.942       | 3.50E-17 | 0.048 | 220.981 | 7.94E+73  | 2.62E+59 |
| Liver                | LM.Cannabis | 20.615            | 2.734      | 7.539       | 3.18E-12 | 0.158 | 68.146  | 6.20E+51  | 2.71E+38 |
| Myeloma              | LM.Cannabis | 9.410             | 1.646      | 5.718       | 4.40E-08 | 0.127 | 154.791 | 3.47E+29  | 3.45E+19 |
| Leukaemia - Lymphoid | LM.Cannabis | 14.507            | 3.986      | 3.640       | 8.98E-04 | 0.141 | 37.529  | 7.07E+40  | 1.14E+19 |
| Hodgkins             | LM.Cannabis | 10.659            | 1.719      | 6.199       | 3.21E-09 | 0.190 | 97.378  | 2.68E+22  | 2.79E+15 |
| Pancreas             | THC.Herb    | 4.735             | 0.692      | 6.841       | 1.19E-10 | 0.093 | 170.289 | 3.17E+20  | 5.31E+14 |
| Kidney               | LM.Cannabis | 7.878             | 1.985      | 3.968       | 1.05E-04 | 0.129 | 119.188 | 3.11E+24  | 3.69E+12 |
| Kidney               | THC.Herb    | 5.497             | 0.858      | 6.407       | 1.26E-09 | 0.129 | 119.188 | 1.51E+17  | 1.06E+12 |
| Oesophagus           | LM.Cannabis | 8.592             | 2.271      | 3.784       | 2.10E-04 | 0.153 | 82.451  | 3.11E+22  | 1.05E+11 |
| Leukaemia - Myeloid  | THC.Herb    | 11.054            | 3.433      | 3.220       | 2.82E-03 | 0.163 | 17.291  | 1.45E+27  | 6.95E+10 |
| Melanoma             | LM.Cannabis | 8.008             | 2.183      | 3.668       | 3.22E-04 | 0.153 | 88.398  | 1.12E+21  | 9.64E+09 |
| Cervix               | THC.Herb    | 4.984             | 0.898      | 5.550       | 1.03E-07 | 0.143 | 103.542 | 1.26E+14  | 1.73E+09 |
| Pancreas             | LM.Cannabis | 5.298             | 1.704      | 3.109       | 2.18E-03 | 0.093 | 170.289 | 8.00E+22  | 4.84E+08 |
| Colorectum           | LM.Cannabis | 6.280             | 1.949      | 3.222       | 1.51E-03 | 0.126 | 124.025 | 1.16E+20  | 1.16E+08 |
| Prostate             | THC.Herb    | 4.050             | 0.889      | 4.557       | 9.66E-06 | 0.128 | 109.867 | 6.66E+12  | 2.81E+07 |
| Thyroid              | LM.Cannabis | 9.862             | 3.297      | 2.991       | 3.17E-03 | 0.199 | 28.161  | 7.90E+19  | 1.21E+07 |
| All Cancers          | THC.Herb    | 2.680             | 0.846      | 3.170       | 2.53E-03 | 0.065 | 77.214  | 4.25E+16  | 3.58E+06 |
| Stomach              | THC.Herb    | 3.233             | 0.792      | 4.081       | 6.73E-05 | 0.107 | 138.190 | 1.71E+12  | 3.26E+06 |
| Larynx               | THC.Herb    | 4.407             | 1.100      | 4.008       | 8.95E-05 | 0.175 | 55.624  | 1.71E+10  | 2.43E+05 |
| Ovary                | THC.Herb    | 2.308             | 0.641      | 3.603       | 4.09E-04 | 0.101 | 184.626 | 2.00E+09  | 2.60E+04 |
| Breast               | THC.Herb    | 1.921             | 0.538      | 3.568       | 4.62E-04 | 0.085 | 225.891 | 1.53E+09  | 2.06E+04 |
| Colorectum           | THC.Herb    | 2.908             | 0.838      | 3.471       | 6.49E-04 | 0.126 | 124.025 | 2.83E+09  | 1.97E+04 |
| Melanoma             | THC.Herb    | 3.405             | 0.963      | 3.535       | 5.18E-04 | 0.153 | 88.398  | 1.33E+09  | 1.75E+04 |
| Testis               | THC.Herb    | 2.995             | 0.979      | 3.060       | 2.55E-03 | 0.137 | 124.374 | 8.18E+08  | 2.56E+03 |
| Myeloma              | THC.Herb    | 2.522             | 0.824      | 3.062       | 2.54E-03 | 0.127 | 154.791 | 1.37E+08  | 1.35E+03 |

|                       |             |       |       |       |          |       |         |          |          |
|-----------------------|-------------|-------|-------|-------|----------|-------|---------|----------|----------|
| Non-Hodgkins lymphoma | THC.Herb    | 1.829 | 0.637 | 2.873 | 4.57E-03 | 0.089 | 190.181 | 2.78E+08 | 7.93E+02 |
| Prostate              | LM.Cannabis | 4.499 | 2.104 | 2.139 | 3.38E-02 | 0.128 | 109.867 | 1.63E+14 | 3.04E+01 |
| Prostate              | Income      | 0.453 | 0.048 | 9.382 | 3.14E-17 | 0.128 | 109.867 | 5.00E+01 | 2.52E+01 |
| Leukaemia - Myeloid   | Income      | 0.823 | 0.202 | 4.070 | 2.65E-04 | 0.163 | 17.291  | 2.00E+02 | 2.14E+01 |
| Liver                 | THC.Herb    | 3.167 | 1.412 | 2.243 | 2.63E-02 | 0.158 | 68.146  | 1.63E+08 | 2.00E+01 |
| Bladder               | THC.Herb    | 2.105 | 0.902 | 2.333 | 2.07E-02 | 0.135 | 107.200 | 3.00E+06 | 1.94E+01 |
| Oesophagus            | THC.Herb    | 2.206 | 0.994 | 2.220 | 2.77E-02 | 0.153 | 82.451  | 9.99E+05 | 9.00E+00 |
| Thyroid               | Income      | 0.381 | 0.079 | 4.851 | 2.64E-06 | 0.199 | 28.161  | 1.09E+01 | 5.11E+00 |
| Breast                | Income      | 0.136 | 0.028 | 4.834 | 2.89E-06 | 0.085 | 225.891 | 7.99E+00 | 4.17E+00 |
| Gallbladder & Biliary | Alcohol     | 0.191 | 0.053 | 3.580 | 4.57E-04 | 0.125 | 111.944 | 7.48E+00 | 3.16E+00 |
| Myeloma               | Income      | 0.162 | 0.040 | 4.072 | 6.98E-05 | 0.127 | 154.791 | 5.85E+00 | 3.06E+00 |
| Oropharynx_Broad      | Income      | 0.126 | 0.052 | 2.427 | 2.12E-02 | 0.040 | 59.858  | 3.37E+01 | 2.86E+00 |
| Lung                  | Alcohol     | 0.039 | 0.009 | 4.221 | 3.88E-05 | 0.046 | 281.596 | 3.78E+00 | 2.41E+00 |
| Leukaemia - Myeloid   | Tobacco     | 0.120 | 0.025 | 4.724 | 3.90E-05 | 0.163 | 17.291  | 3.33E+00 | 2.33E+00 |
| Colorectum            | Alcohol     | 0.093 | 0.021 | 4.507 | 1.18E-05 | 0.126 | 124.025 | 3.34E+00 | 2.29E+00 |
| Oesophagus            | Income      | 0.166 | 0.052 | 3.167 | 1.81E-03 | 0.153 | 82.451  | 4.81E+00 | 2.28E+00 |
| Hodgkins              | THC.Resin   | 0.595 | 0.270 | 2.209 | 2.83E-02 | 0.190 | 97.378  | 3.39E+01 | 2.12E+00 |
| All Cancers nNMSC     | Tobacco     | 0.021 | 0.004 | 5.696 | 9.55E-08 | 0.048 | 220.981 | 2.32E+00 | 1.91E+00 |
| Anus                  | Income      | 0.136 | 0.052 | 2.608 | 9.88E-03 | 0.144 | 111.232 | 4.14E+00 | 1.78E+00 |
| Hodgkins              | Income      | 0.117 | 0.047 | 2.506 | 1.30E-02 | 0.190 | 97.378  | 2.90E+00 | 1.52E+00 |
| Myeloma               | Tobacco     | 0.022 | 0.005 | 4.509 | 1.17E-05 | 0.127 | 154.791 | 1.62E+00 | 1.41E+00 |
| Prostate              | Tobacco     | 0.025 | 0.006 | 3.773 | 2.20E-04 | 0.128 | 109.867 | 1.67E+00 | 1.40E+00 |
| Larynx                | Tobacco     | 0.029 | 0.007 | 3.885 | 1.44E-04 | 0.175 | 55.624  | 1.60E+00 | 1.37E+00 |
| Hodgkins              | Tobacco     | 0.020 | 0.005 | 4.038 | 7.70E-05 | 0.190 | 97.378  | 1.43E+00 | 1.28E+00 |
| Oesophagus            | Tobacco     | 0.021 | 0.007 | 3.069 | 2.48E-03 | 0.153 | 82.451  | 1.52E+00 | 1.27E+00 |
| Breast                | Tobacco     | 0.011 | 0.004 | 3.023 | 2.87E-03 | 0.085 | 225.891 | 1.50E+00 | 1.25E+00 |
| Non-Hodgkins lymphoma | Tobacco     | 0.012 | 0.005 | 2.417 | 1.67E-02 | 0.089 | 190.181 | 1.50E+00 | 1.18E+00 |
| Ovary                 | Tobacco     | 0.009 | 0.004 | 2.114 | 3.59E-02 | 0.101 | 184.626 | 1.39E+00 | 1.09E+00 |
| Oropharynx            | Alcohol     | 0.011 | 0.125 | 0.085 | 9.32E-01 | 0.390 | -16.719 | 1.19E+00 | 1.00E+00 |
| Stomach               | Tobacco     | 0.004 | 0.006 | 0.666 | 5.06E-01 | 0.107 | 138.190 | 1.22E+00 | 1.00E+00 |

|                       |             |       |       |       |          |       |          |          |          |
|-----------------------|-------------|-------|-------|-------|----------|-------|----------|----------|----------|
| Colorectum            | Tobacco     | 0.006 | 0.006 | 1.016 | 3.11E-01 | 0.126 | 124.025  | 1.26E+00 | 1.00E+00 |
| Corpus Uteri          | Alcohol     | 0.021 | 0.049 | 0.429 | 6.68E-01 | 0.354 | -103.266 | 1.30E+00 | 1.00E+00 |
| Kidney                | Tobacco     | 0.009 | 0.006 | 1.532 | 1.27E-01 | 0.129 | 119.188  | 1.34E+00 | 1.00E+00 |
| Testis                | Income      | 0.010 | 0.048 | 0.215 | 8.30E-01 | 0.137 | 124.374  | 1.35E+00 | 1.00E+00 |
| Liver                 | Tobacco     | 0.012 | 0.008 | 1.434 | 1.54E-01 | 0.158 | 68.146   | 1.35E+00 | 1.00E+00 |
| Liver                 | Income      | 0.020 | 0.064 | 0.313 | 7.54E-01 | 0.158 | 68.146   | 1.49E+00 | 1.00E+00 |
| Oropharynx            | Tobacco     | 0.052 | 0.051 | 1.019 | 3.15E-01 | 0.390 | -16.719  | 1.51E+00 | 1.00E+00 |
| Prostate              | Alcohol     | 0.018 | 0.022 | 0.836 | 4.04E-01 | 0.128 | 109.867  | 1.54E+00 | 1.00E+00 |
| Kidney                | Income      | 0.019 | 0.046 | 0.419 | 6.76E-01 | 0.129 | 119.188  | 1.55E+00 | 1.00E+00 |
| Lung                  | Income      | 0.008 | 0.024 | 0.331 | 7.41E-01 | 0.046 | 281.596  | 1.61E+00 | 1.00E+00 |
| Brain                 | Income      | 0.024 | 0.050 | 0.478 | 6.34E-01 | 0.137 | 99.167   | 1.62E+00 | 1.00E+00 |
| Colorectum            | Income      | 0.025 | 0.045 | 0.554 | 5.80E-01 | 0.126 | 124.025  | 1.68E+00 | 1.00E+00 |
| Stomach               | Alcohol     | 0.035 | 0.020 | 1.802 | 7.33E-02 | 0.107 | 138.190  | 2.04E+00 | 1.00E+00 |
| Melanoma              | Income      | 0.069 | 0.051 | 1.366 | 1.74E-01 | 0.153 | 88.398   | 2.39E+00 | 1.00E+00 |
| Non-Hodgkins lymphoma | Income      | 0.041 | 0.036 | 1.139 | 2.56E-01 | 0.089 | 190.181  | 2.40E+00 | 1.00E+00 |
| Leukaemia - Myeloid   | Alcohol     | 0.081 | 0.136 | 0.591 | 5.58E-01 | 0.163 | 17.291   | 2.51E+00 | 1.00E+00 |
| Gallbladder & Biliary | Income      | 0.116 | 0.075 | 1.544 | 1.25E-01 | 0.125 | 111.944  | 4.07E+00 | 1.00E+00 |
| Liver                 | THC.Resin   | 0.173 | 0.611 | 0.284 | 7.77E-01 | 0.158 | 68.146   | 4.86E+00 | 1.00E+00 |
| All Cancers           | Income      | 0.075 | 0.054 | 1.394 | 1.69E-01 | 0.065 | 77.214   | 5.21E+00 | 1.00E+00 |
| Oropharynx            | Income      | 0.495 | 0.413 | 1.198 | 2.38E-01 | 0.390 | -16.719  | 5.80E+00 | 1.00E+00 |
| Myeloma               | THC.Resin   | 0.213 | 0.306 | 0.698 | 4.86E-01 | 0.127 | 154.791  | 8.68E+00 | 1.00E+00 |
| Thyroid               | THC.Resin   | 0.392 | 0.681 | 0.575 | 5.66E-01 | 0.199 | 28.161   | 1.15E+01 | 1.00E+00 |
| Anus                  | THC.Resin   | 0.554 | 0.439 | 1.261 | 2.09E-01 | 0.144 | 111.232  | 6.53E+01 | 1.00E+00 |
| Corpus Uteri          | THC.Herb    | 1.497 | 2.039 | 0.734 | 4.64E-01 | 0.354 | -103.266 | 9.37E+01 | 1.00E+00 |
| Hodgkins              | THC.Herb    | 1.316 | 0.849 | 1.549 | 1.23E-01 | 0.190 | 97.378   | 1.08E+03 | 1.00E+00 |
| Thyroid               | THC.Herb    | 1.393 | 1.538 | 0.906 | 3.66E-01 | 0.199 | 28.161   | 1.17E+03 | 1.00E+00 |
| All Cancers           | LM.Cannabis | 0.538 | 1.992 | 0.270 | 7.88E-01 | 0.065 | 77.214   | 3.81E+03 | 1.00E+00 |
| Leukaemia - Myeloid   | THC.Resin   | 1.512 | 1.291 | 1.172 | 2.50E-01 | 0.163 | 17.291   | 9.47E+03 | 1.00E+00 |
| Brain                 | THC.Herb    | 1.279 | 0.928 | 1.378 | 1.70E-01 | 0.137 | 99.167   | 9.81E+03 | 1.00E+00 |
| Larynx                | LM.Cannabis | 2.344 | 2.475 | 0.947 | 3.45E-01 | 0.175 | 55.624   | 3.83E+05 | 1.00E+00 |

|                       |             |        |       |        |          |       |          |          |          |
|-----------------------|-------------|--------|-------|--------|----------|-------|----------|----------|----------|
| Anus                  | LM.Cannabis | 2.090  | 2.197 | 0.951  | 3.43E-01 | 0.144 | 111.232  | 1.06E+06 | 1.00E+00 |
| Testis                | LM.Cannabis | 2.621  | 1.998 | 1.311  | 1.91E-01 | 0.137 | 124.374  | 6.87E+07 | 1.00E+00 |
| Oropharynx            | THC.Herb    | 8.718  | 5.014 | 1.739  | 9.00E-02 | 0.390 | -16.719  | 1.35E+09 | 1.00E+00 |
| Non-Hodgkins lymphoma | LM.Cannabis | 2.262  | 1.547 | 1.462  | 1.46E-01 | 0.089 | 190.181  | 2.35E+10 | 1.00E+00 |
| Breast                | LM.Cannabis | 2.253  | 1.215 | 1.854  | 6.55E-02 | 0.085 | 225.891  | 5.20E+10 | 1.00E+00 |
| Bladder               | Tobacco     | -0.001 | 0.006 | -0.230 | 8.19E-01 | 0.135 | 107.200  | 1.11E+00 | -        |
| Leukaemia - Lymphoid  | Alcohol     | -0.002 | 0.038 | -0.048 | 9.62E-01 | 0.141 | 37.529   | 1.12E+00 | -        |
| Pancreas              | Tobacco     | -0.001 | 0.005 | -0.239 | 8.11E-01 | 0.093 | 170.289  | 1.13E+00 | -        |
| Corpus Uteri          | Tobacco     | -0.006 | 0.013 | -0.449 | 6.54E-01 | 0.354 | -103.266 | 1.14E+00 | -        |
| All Cancers           | Tobacco     | -0.001 | 0.007 | -0.196 | 8.45E-01 | 0.065 | 77.214   | 1.16E+00 | -        |
| Ovary                 | Alcohol     | -0.003 | 0.016 | -0.176 | 8.61E-01 | 0.101 | 184.626  | 1.19E+00 | -        |
| Thyroid               | Tobacco     | -0.007 | 0.010 | -0.680 | 4.97E-01 | 0.199 | 28.161   | 1.21E+00 | -        |
| Brain                 | Tobacco     | -0.006 | 0.007 | -0.935 | 3.51E-01 | 0.137 | 99.167   | 1.25E+00 | -        |
| Larynx                | Alcohol     | -0.009 | 0.027 | -0.338 | 7.36E-01 | 0.175 | 55.624   | 1.27E+00 | -        |
| Anus                  | Tobacco     | -0.009 | 0.007 | -1.312 | 1.91E-01 | 0.144 | 111.232  | 1.30E+00 | -        |
| Brain                 | Alcohol     | -0.009 | 0.023 | -0.375 | 7.08E-01 | 0.137 | 99.167   | 1.31E+00 | -        |
| Hodgkins              | Alcohol     | -0.015 | 0.021 | -0.695 | 4.88E-01 | 0.190 | 97.378   | 1.35E+00 | -        |
| Melanoma              | Tobacco     | -0.012 | 0.007 | -1.881 | 6.16E-02 | 0.153 | 88.398   | 1.36E+00 | -        |
| Testis                | Tobacco     | -0.018 | 0.006 | -2.971 | 3.39E-03 | 0.137 | 124.374  | 1.50E+00 | -        |
| Thyroid               | Alcohol     | -0.032 | 0.037 | -0.890 | 3.75E-01 | 0.199 | 28.161   | 1.59E+00 | -        |
| Gallbladder & Biliary | Tobacco     | -0.024 | 0.010 | -2.529 | 1.24E-02 | 0.125 | 111.944  | 1.67E+00 | -        |
| Cervix                | Tobacco     | -0.029 | 0.006 | -4.774 | 3.77E-06 | 0.143 | 103.542  | 1.70E+00 | -        |
| Lung                  | Tobacco     | -0.010 | 0.003 | -3.092 | 2.31E-03 | 0.046 | 281.596  | 1.73E+00 | -        |
| Myeloma               | Alcohol     | -0.034 | 0.019 | -1.735 | 8.45E-02 | 0.127 | 154.791  | 1.86E+00 | -        |
| Bladder               | Alcohol     | -0.037 | 0.022 | -1.657 | 9.93E-02 | 0.135 | 107.200  | 1.89E+00 | -        |
| Corpus Uteri          | Income      | -0.101 | 0.106 | -0.951 | 3.43E-01 | 0.354 | -103.266 | 1.91E+00 | -        |
| Bladder               | Income      | -0.041 | 0.048 | -0.844 | 4.00E-01 | 0.135 | 107.200  | 1.96E+00 | -        |
| Leukaemia - Lymphoid  | Tobacco     | -0.050 | 0.012 | -3.994 | 3.30E-04 | 0.141 | 37.529   | 2.10E+00 | -        |
| Larynx                | Income      | -0.064 | 0.057 | -1.119 | 2.65E-01 | 0.175 | 55.624   | 2.14E+00 | -        |
| All Cancers           | Alcohol     | -0.026 | 0.027 | -0.965 | 3.39E-01 | 0.065 | 77.214   | 2.23E+00 | -        |

|                       |             |        |       |        |          |       |          |          |   |
|-----------------------|-------------|--------|-------|--------|----------|-------|----------|----------|---|
| Testis                | Alcohol     | -0.056 | 0.023 | -2.405 | 1.72E-02 | 0.137 | 124.374  | 2.25E+00 | - |
| Cervix                | Alcohol     | -0.058 | 0.022 | -2.663 | 8.46E-03 | 0.143 | 103.542  | 2.26E+00 | - |
| Kidney                | Alcohol     | -0.053 | 0.021 | -2.518 | 1.27E-02 | 0.129 | 119.188  | 2.28E+00 | - |
| Oropharynx_Broad      | Tobacco     | -0.018 | 0.022 | -0.815 | 4.22E-01 | 0.040 | 59.858   | 2.37E+00 | - |
| Anus                  | Alcohol     | -0.068 | 0.025 | -2.740 | 6.75E-03 | 0.144 | 111.232  | 2.45E+00 | - |
| Pancreas              | Income      | -0.046 | 0.039 | -1.163 | 2.46E-01 | 0.093 | 170.289  | 2.51E+00 | - |
| Oesophagus            | Alcohol     | -0.085 | 0.024 | -3.488 | 6.11E-04 | 0.153 | 82.451   | 2.71E+00 | - |
| Breast                | Alcohol     | -0.058 | 0.013 | -4.411 | 1.79E-05 | 0.085 | 225.891  | 3.12E+00 | - |
| Melanoma              | Alcohol     | -0.118 | 0.024 | -4.998 | 1.37E-06 | 0.153 | 88.398   | 3.45E+00 | - |
| Oropharynx            | THC.Resin   | -0.310 | 2.419 | -0.128 | 8.99E-01 | 0.390 | -16.719  | 3.54E+00 | - |
| Oesophagus            | THC.Resin   | -0.124 | 0.413 | -0.301 | 7.64E-01 | 0.153 | 82.451   | 3.60E+00 | - |
| Liver                 | Alcohol     | -0.146 | 0.030 | -4.825 | 3.21E-06 | 0.158 | 68.146   | 4.05E+00 | - |
| Pancreas              | Alcohol     | -0.102 | 0.017 | -5.965 | 1.27E-08 | 0.093 | 170.289  | 4.91E+00 | - |
| Cervix                | LM.Cannabis | -0.179 | 2.026 | -0.088 | 9.30E-01 | 0.143 | 103.542  | 5.69E+00 | - |
| Oropharynx_Broad      | Alcohol     | -0.051 | 0.084 | -0.602 | 5.52E-01 | 0.040 | 59.858   | 5.71E+00 | - |
| Non-Hodgkins lymphoma | Alcohol     | -0.124 | 0.016 | -7.829 | 4.33E-13 | 0.089 | 190.181  | 6.57E+00 | - |
| Ovary                 | Income      | -0.148 | 0.034 | -4.403 | 1.84E-05 | 0.101 | 184.626  | 6.99E+00 | - |
| Anus                  | THC.Herb    | -0.247 | 1.059 | -0.233 | 8.16E-01 | 0.144 | 111.232  | 8.94E+00 | - |
| Stomach               | Income      | -0.221 | 0.045 | -4.951 | 1.69E-06 | 0.107 | 138.190  | 1.25E+01 | - |
| Leukaemia - Lymphoid  | Income      | -0.303 | 0.103 | -2.928 | 6.05E-03 | 0.141 | 37.529   | 1.35E+01 | - |
| Non-Hodgkins lymphoma | THC.Resin   | -0.204 | 0.296 | -0.691 | 4.91E-01 | 0.089 | 190.181  | 1.57E+01 | - |
| All Cancers nNMSC     | Income      | -0.119 | 0.026 | -4.649 | 8.95E-06 | 0.048 | 220.981  | 1.84E+01 | - |
| Cervix                | Income      | -0.363 | 0.047 | -7.741 | 7.26E-13 | 0.143 | 103.542  | 1.98E+01 | - |
| All Cancers nNMSC     | Alcohol     | -0.146 | 0.022 | -6.720 | 7.33E-10 | 0.048 | 220.981  | 3.09E+01 | - |
| Melanoma              | THC.Resin   | -0.498 | 0.391 | -1.276 | 2.04E-01 | 0.153 | 88.398   | 3.86E+01 | - |
| Breast                | THC.Resin   | -0.302 | 0.217 | -1.389 | 1.67E-01 | 0.085 | 225.891  | 4.92E+01 | - |
| Corpus Uteri          | THC.Resin   | -1.424 | 0.766 | -1.859 | 6.47E-02 | 0.354 | -103.266 | 7.77E+01 | - |
| Lung                  | THC.Herb    | -0.219 | 0.384 | -0.568 | 5.70E-01 | 0.046 | 281.596  | 1.57E+02 | - |
| Bladder               | LM.Cannabis | -0.670 | 2.093 | -0.320 | 7.49E-01 | 0.135 | 107.200  | 1.85E+02 | - |
| Larynx                | THC.Resin   | -1.132 | 0.441 | -2.565 | 1.11E-02 | 0.175 | 55.624   | 7.11E+02 | - |

|                       |             |         |        |        |          |       |          |          |   |
|-----------------------|-------------|---------|--------|--------|----------|-------|----------|----------|---|
| Brain                 | THC.Resin   | -0.924  | 0.403  | -2.295 | 2.29E-02 | 0.137 | 99.167   | 9.30E+02 | - |
| Bladder               | THC.Resin   | -0.930  | 0.386  | -2.406 | 1.72E-02 | 0.135 | 107.200  | 1.07E+03 | - |
| Gallbladder & Biliary | THC.Resin   | -1.037  | 0.464  | -2.238 | 2.66E-02 | 0.125 | 111.944  | 3.79E+03 | - |
| Colorectum            | THC.Resin   | -1.149  | 0.360  | -3.193 | 1.66E-03 | 0.126 | 124.025  | 8.24E+03 | - |
| Kidney                | THC.Resin   | -1.408  | 0.366  | -3.850 | 1.64E-04 | 0.129 | 119.188  | 4.21E+04 | - |
| Prostate              | THC.Resin   | -1.436  | 0.396  | -3.628 | 3.73E-04 | 0.128 | 109.867  | 5.53E+04 | - |
| Testis                | THC.Resin   | -1.711  | 0.395  | -4.335 | 2.45E-05 | 0.137 | 124.374  | 1.66E+05 | - |
| Brain                 | LM.Cannabis | -1.710  | 2.168  | -0.789 | 4.31E-01 | 0.137 | 99.167   | 1.72E+05 | - |
| Pancreas              | THC.Resin   | -1.183  | 0.332  | -3.563 | 4.69E-04 | 0.093 | 170.289  | 2.22E+05 | - |
| Leukaemia - Lymphoid  | THC.Resin   | -1.944  | 0.613  | -3.169 | 3.23E-03 | 0.141 | 37.529   | 5.44E+05 | - |
| Ovary                 | THC.Resin   | -1.466  | 0.259  | -5.656 | 6.12E-08 | 0.101 | 184.626  | 1.05E+06 | - |
| Lung                  | THC.Resin   | -0.709  | 0.208  | -3.417 | 7.86E-04 | 0.046 | 281.596  | 2.88E+06 | - |
| Leukaemia - Lymphoid  | THC.Herb    | -2.261  | 1.694  | -1.335 | 1.91E-01 | 0.141 | 37.529   | 4.18E+06 | - |
| Ovary                 | LM.Cannabis | -1.851  | 1.448  | -1.279 | 2.03E-01 | 0.101 | 184.626  | 3.32E+07 | - |
| Cervix                | THC.Resin   | -2.636  | 0.362  | -7.285 | 1.02E-11 | 0.143 | 103.542  | 3.97E+07 | - |
| Stomach               | THC.Resin   | -1.980  | 0.376  | -5.266 | 3.95E-07 | 0.107 | 138.190  | 4.06E+07 | - |
| Corpus Uteri          | LM.Cannabis | -6.698  | 4.488  | -1.492 | 1.37E-01 | 0.354 | -103.266 | 6.14E+07 | - |
| All Cancers           | THC.Resin   | -1.302  | 0.390  | -3.334 | 1.57E-03 | 0.065 | 77.214   | 1.70E+08 | - |
| All Cancers nMSC      | THC.Resin   | -1.088  | 0.208  | -5.230 | 7.70E-07 | 0.048 | 220.981  | 1.75E+09 | - |
| Oropharynx_Broad      | THC.Resin   | -1.825  | 0.634  | -2.879 | 7.17E-03 | 0.040 | 59.858   | 1.59E+18 | - |
| Gallbladder & Biliary | LM.Cannabis | -5.709  | 4.876  | -1.171 | 2.43E-01 | 0.125 | 111.944  | 2.18E+18 | - |
| Oropharynx_Broad      | THC.Herb    | -2.015  | 3.877  | -0.520 | 6.07E-01 | 0.040 | 59.858   | 1.15E+20 | - |
| Gallbladder & Biliary | THC.Herb    | -7.062  | 2.911  | -2.426 | 1.64E-02 | 0.125 | 111.944  | 4.07E+22 | - |
| Lung                  | LM.Cannabis | -2.684  | 1.013  | -2.651 | 8.75E-03 | 0.046 | 281.596  | 4.00E+23 | - |
| Oropharynx            | LM.Cannabis | -28.081 | 17.876 | -1.571 | 1.24E-01 | 0.390 | -16.719  | 5.54E+28 | - |
| Stomach               | LM.Cannabis | -10.925 | 1.939  | -5.634 | 6.67E-08 | 0.107 | 138.190  | 4.20E+40 | - |
| Leukaemia - Myeloid   | LM.Cannabis | -37.633 | 26.246 | -1.434 | 1.61E-01 | 0.163 | 17.291   | 5.57E+91 | - |
| Oropharynx_Broad      | LM.Cannabis | -17.440 | 8.264  | -2.110 | 4.30E-02 | 0.040 | 59.858   | Inf      | - |

Supplementary Table S24.: Positive and Significant Terms from Additive Mixed Effects Regression

| Cancer               | Term        | $\beta$ -Estimate | Std. Error | t-Statistic | AIC      | P_Value  | Adj.P.FDR | Adj.P.Holm | E-Value Estimate | E-Value 95% Lower Bound |
|----------------------|-------------|-------------------|------------|-------------|----------|----------|-----------|------------|------------------|-------------------------|
| All Cancers nNMSC    | LM.Cannabis | 15.369            | 2.052      | 7.491       | -423.961 | 1.52E-11 | 2.06E-10  | 7.76E-10   | 3.60E+126        | 3.86E+93                |
| All Cancers nNMSC    | THC.Herb    | 8.959             | 0.901      | 9.942       | -423.961 | 3.50E-17 | 9.46E-16  | 1.86E-15   | 7.94E+73         | 2.62E+59                |
| Liver                | LM.Cannabis | 20.615            | 2.734      | 7.539       | -118.291 | 3.18E-12 | 5.73E-11  | 1.65E-10   | 6.20E+51         | 2.71E+38                |
| Myeloma              | LM.Cannabis | 9.410             | 1.646      | 5.718       | -291.582 | 4.40E-08 | 2.97E-07  | 2.07E-06   | 3.47E+29         | 3.45E+19                |
| Leukaemia - Lymphoid | LM.Cannabis | 14.507            | 3.986      | 3.640       | -57.057  | 8.98E-04 | 1.47E-03  | 1.97E-02   | 7.07E+40         | 1.14E+19                |
| Hodgkins             | LM.Cannabis | 10.659            | 1.719      | 6.199       | -176.757 | 3.21E-09 | 2.48E-08  | 1.54E-07   | 2.68E+22         | 2.79E+15                |
| Pancreas             | THC.Herb    | 4.735             | 0.692      | 6.841       | -322.579 | 1.19E-10 | 1.28E-09  | 5.95E-09   | 3.17E+20         | 5.31E+14                |
| Kidney               | LM.Cannabis | 7.878             | 1.985      | 3.968       | -220.375 | 1.05E-04 | 2.57E-04  | 3.45E-03   | 3.11E+24         | 3.69E+12                |
| Kidney               | THC.Herb    | 5.497             | 0.858      | 6.407       | -220.375 | 1.26E-09 | 1.13E-08  | 6.18E-08   | 1.51E+17         | 1.06E+12                |
| Oesophagus           | LM.Cannabis | 8.592             | 2.271      | 3.784       | -146.903 | 2.10E-04 | 4.73E-04  | 6.51E-03   | 3.11E+22         | 1.05E+11                |
| Leukaemia - Myeloid  | THC.Herb    | 11.054            | 3.433      | 3.220       | -16.581  | 2.82E-03 | 3.69E-03  | 4.47E-02   | 1.45E+27         | 6.95E+10                |
| Melanoma             | LM.Cannabis | 8.008             | 2.183      | 3.668       | -158.797 | 3.22E-04 | 6.44E-04  | 9.02E-03   | 1.12E+21         | 9.64E+09                |
| Cervix               | THC.Herb    | 4.984             | 0.898      | 5.550       | -189.083 | 1.03E-07 | 5.55E-07  | 4.62E-06   | 1.26E+14         | 1.73E+09                |
| Pancreas             | LM.Cannabis | 5.298             | 1.704      | 3.109       | -322.579 | 2.18E-03 | 3.27E-03  | 4.14E-02   | 8.00E+22         | 4.84E+08                |
| Colorectum           | LM.Cannabis | 6.280             | 1.949      | 3.222       | -230.050 | 1.51E-03 | 2.40E-03  | 3.17E-02   | 1.16E+20         | 1.16E+08                |
| Prostate             | THC.Herb    | 4.050             | 0.889      | 4.557       | -201.735 | 9.66E-06 | 4.01E-05  | 4.06E-04   | 6.66E+12         | 2.81E+07                |
| Thyroid              | LM.Cannabis | 9.862             | 3.297      | 2.991       | -38.321  | 3.17E-03 | 3.98E-03  | 4.47E-02   | 7.90E+19         | 1.21E+07                |
| All Cancers          | THC.Herb    | 2.680             | 0.846      | 3.170       | -136.427 | 2.53E-03 | 3.45E-03  | 4.47E-02   | 4.25E+16         | 3.58E+06                |



|                       |             |       |       |       |          |          |          |          |          |          |
|-----------------------|-------------|-------|-------|-------|----------|----------|----------|----------|----------|----------|
| Stomach               | THC.Herb    | 3.233 | 0.792 | 4.081 | -258.380 | 6.73E-05 | 1.98E-04 | 2.49E-03 | 1.71E+12 | 3.26E+06 |
| Larynx                | THC.Herb    | 4.407 | 1.100 | 4.008 | -93.247  | 8.95E-05 | 2.30E-04 | 3.04E-03 | 1.71E+10 | 2.43E+05 |
| Ovary                 | THC.Herb    | 2.308 | 0.641 | 3.603 | -351.253 | 4.09E-04 | 7.89E-04 | 1.10E-02 | 2.00E+09 | 2.60E+04 |
| Breast                | THC.Herb    | 1.921 | 0.538 | 3.568 | -433.783 | 4.62E-04 | 8.32E-04 | 1.19E-02 | 1.53E+09 | 2.06E+04 |
| Colorectum            | THC.Herb    | 2.908 | 0.838 | 3.471 | -230.050 | 6.49E-04 | 1.09E-03 | 1.49E-02 | 2.83E+09 | 1.97E+04 |
| Melanoma              | THC.Herb    | 3.405 | 0.963 | 3.535 | -158.797 | 5.18E-04 | 9.02E-04 | 1.24E-02 | 1.33E+09 | 1.75E+04 |
| Testis                | THC.Herb    | 2.995 | 0.979 | 3.060 | -230.748 | 2.55E-03 | 3.45E-03 | 4.47E-02 | 8.18E+08 | 2.56E+03 |
| Myeloma               | THC.Herb    | 2.522 | 0.824 | 3.062 | -291.582 | 2.54E-03 | 3.45E-03 | 4.47E-02 | 1.37E+08 | 1.35E+03 |
| Non-Hodgkins lymphoma | THC.Herb    | 1.829 | 0.637 | 2.873 | -362.362 | 4.57E-03 | 5.61E-03 | 5.03E-02 | 2.78E+08 | 7.93E+02 |
| Prostate              | LM.Cannabis | 4.499 | 2.104 | 2.139 | -201.735 | 3.38E-02 | 3.45E-02 | 1.45E-01 | 1.63E+14 | 3.04E+01 |
| Prostate              | Income      | 0.453 | 0.048 | 9.382 | -201.735 | 3.14E-17 | 9.46E-16 | 1.70E-15 | 5.00E+01 | 2.52E+01 |
| Leukaemia - Myeloid   | Income      | 0.823 | 0.202 | 4.070 | -16.581  | 2.65E-04 | 5.50E-04 | 7.68E-03 | 2.00E+02 | 2.14E+01 |
| Liver                 | THC.Herb    | 3.167 | 1.412 | 2.243 | -118.291 | 2.63E-02 | 2.84E-02 | 1.45E-01 | 1.63E+08 | 2.00E+01 |
| Bladder               | THC.Herb    | 2.105 | 0.902 | 2.333 | -196.399 | 2.07E-02 | 2.33E-02 | 1.45E-01 | 3.00E+06 | 1.94E+01 |
| Oesophagus            | THC.Herb    | 2.206 | 0.994 | 2.220 | -146.903 | 2.77E-02 | 2.93E-02 | 1.45E-01 | 9.99E+05 | 9.00E+00 |
| Thyroid               | Income      | 0.381 | 0.079 | 4.851 | -38.321  | 2.64E-06 | 1.30E-05 | 1.16E-04 | 1.09E+01 | 5.11E+00 |
| Breast                | Income      | 0.136 | 0.028 | 4.834 | -433.783 | 2.89E-06 | 1.30E-05 | 1.24E-04 | 7.99E+00 | 4.17E+00 |
| Gallbladder & Biliary | Alcohol     | 0.191 | 0.053 | 3.580 | -205.889 | 4.57E-04 | 8.32E-04 | 1.19E-02 | 7.48E+00 | 3.16E+00 |
| Myeloma               | Income      | 0.162 | 0.040 | 4.072 | -291.582 | 6.98E-05 | 1.98E-04 | 2.51E-03 | 5.85E+00 | 3.06E+00 |
| Oropharynx_Broad      | Income      | 0.126 | 0.052 | 2.427 | -101.716 | 2.12E-02 | 2.34E-02 | 1.45E-01 | 3.37E+01 | 2.86E+00 |
| Lung                  | Alcohol     | 0.039 | 0.009 | 4.221 | -545.192 | 3.88E-05 | 1.24E-04 | 1.51E-03 | 3.78E+00 | 2.41E+00 |
| Leukaemia - Myeloid   | Tobacco     | 0.120 | 0.025 | 4.724 | -16.581  | 3.90E-05 | 1.24E-04 | 1.51E-03 | 3.33E+00 | 2.33E+00 |
| Colorectum            | Alcohol     | 0.093 | 0.021 | 4.507 | -230.050 | 1.18E-05 | 4.24E-05 | 4.80E-04 | 3.34E+00 | 2.29E+00 |
| Oesophagus            | Income      | 0.166 | 0.052 | 3.167 | -146.903 | 1.81E-03 | 2.79E-03 | 3.62E-02 | 4.81E+00 | 2.28E+00 |
| Hodgkins              | THC.Resin   | 0.595 | 0.270 | 2.209 | -176.757 | 2.83E-02 | 2.94E-02 | 1.45E-01 | 3.39E+01 | 2.12E+00 |
| All Cancers nMSC      | Tobacco     | 0.021 | 0.004 | 5.696 | -423.961 | 9.55E-08 | 5.55E-07 | 4.39E-06 | 2.32E+00 | 1.91E+00 |
| Anus                  | Income      | 0.136 | 0.052 | 2.608 | -204.465 | 9.88E-03 | 1.19E-02 | 9.88E-02 | 4.14E+00 | 1.78E+00 |
| Hodgkins              | Income      | 0.117 | 0.047 | 2.506 | -176.757 | 1.30E-02 | 1.53E-02 | 1.17E-01 | 2.90E+00 | 1.52E+00 |
| Myeloma               | Tobacco     | 0.022 | 0.005 | 4.509 | -291.582 | 1.17E-05 | 4.24E-05 | 4.80E-04 | 1.62E+00 | 1.41E+00 |

|                       |         |       |       |       |          |          |          |          |          |          |
|-----------------------|---------|-------|-------|-------|----------|----------|----------|----------|----------|----------|
| Prostate              | Tobacco | 0.025 | 0.006 | 3.773 | -201.735 | 2.20E-04 | 4.74E-04 | 6.59E-03 | 1.67E+00 | 1.40E+00 |
| Larynx                | Tobacco | 0.029 | 0.007 | 3.885 | -93.247  | 1.44E-04 | 3.37E-04 | 4.60E-03 | 1.60E+00 | 1.37E+00 |
| Hodgkins              | Tobacco | 0.020 | 0.005 | 4.038 | -176.757 | 7.70E-05 | 2.08E-04 | 2.70E-03 | 1.43E+00 | 1.28E+00 |
| Oesophagus            | Tobacco | 0.021 | 0.007 | 3.069 | -146.903 | 2.48E-03 | 3.45E-03 | 4.47E-02 | 1.52E+00 | 1.27E+00 |
| Breast                | Tobacco | 0.011 | 0.004 | 3.023 | -433.783 | 2.87E-03 | 3.69E-03 | 4.47E-02 | 1.50E+00 | 1.25E+00 |
| Non-Hodgkins lymphoma | Tobacco | 0.012 | 0.005 | 2.417 | -362.362 | 1.67E-02 | 1.91E-02 | 1.33E-01 | 1.50E+00 | 1.18E+00 |
| Ovary                 | Tobacco | 0.009 | 0.004 | 2.114 | -351.253 | 3.59E-02 | 3.59E-02 | 1.45E-01 | 1.39E+00 | 1.09E+00 |

Supplementary Table S25.: Summary Table for Significant Positive Terms from Mixed Effects Additive Regression

| Term                | Count | Negative<br>Total of P-<br>Value<br>Exponents | Mean of the<br>Negative P-<br>Value<br>Exponents | Median of<br>the Negative<br>P-Value<br>Exponents | Total of the<br>Lower E-<br>Value<br>Exponents | Mean of the<br>Lower E-<br>Value<br>Exponents | Median of<br>the Lower E-<br>Value<br>Exponents |
|---------------------|-------|-----------------------------------------------|--------------------------------------------------|---------------------------------------------------|------------------------------------------------|-----------------------------------------------|-------------------------------------------------|
| Last Month Cannabis | 19    | 189                                           | 9.95                                             | 8                                                 | 341                                            | 17.95                                         | 17                                              |
| Herb.THC            | 21    | 551                                           | 26.24                                            | 18                                                | 165                                            | 7.86                                          | 7                                               |
| Resin.THC           | 5     | 13                                            | 2.60                                             | 2                                                 | 5                                              | 1.00                                          | 0                                               |
| Income              | 7     | 29                                            | 4.14                                             | 5                                                 | 1                                              | 0.14                                          | 0                                               |
| Alcohol             | 4     | 17                                            | 4.25                                             | 2                                                 | 0                                              | 0                                             | 0                                               |
| Tobacco             | 14    | 55                                            | 3.93                                             | 2.5                                               | 0                                              | 0                                             | 0                                               |

Supplementary Table S26.: Complete Output from Additive Mixed Effects Regression

| Cancer                | Term        | $\beta$ -Estimate | Std. Error | P-Value  | E-Value Estimate | 95% Lower Bound of the E-Value |
|-----------------------|-------------|-------------------|------------|----------|------------------|--------------------------------|
| All Cancers nNMSC     | LM.Cannabis | 28.793            | 2.305      | 7.96E-26 | 3.50E+60         | 1.29E+51                       |
| Myeloma               | LM.Cannabis | 18.834            | 2.110      | 1.64E-16 | 1.79E+43         | 6.91E+33                       |
| Lung                  | LM.Cannabis | 27.039            | 2.293      | 1.32E-25 | 7.26E+39         | 2.00E+33                       |
| Kidney                | LM.Cannabis | 34.251            | 2.951      | 4.67E-25 | 1.70E+39         | 4.68E+32                       |
| Pancreas              | LM.Cannabis | 29.502            | 2.956      | 7.13E-20 | 5.97E+33         | 1.65E+27                       |
| Leukaemia - Lymphoid  | LM.Cannabis | 9.998             | 2.584      | 3.66E-04 | 1.09E+45         | 2.64E+22                       |
| All Cancers nNMSC     | THC.Herb    | 10.642            | 0.521      | 1.15E-47 | 3.69E+22         | 2.73E+20                       |
| Non-Hodgkins lymphoma | LM.Cannabis | 26.819            | 3.429      | 1.75E-13 | 3.42E+26         | 9.39E+19                       |
| Colorectum            | LM.Cannabis | 18.142            | 2.303      | 1.13E-13 | 5.83E+25         | 2.76E+19                       |
| Prostate              | LM.Cannabis | 22.525            | 3.112      | 6.20E-12 | 3.77E+24         | 1.04E+18                       |
| All Cancers           | LM.Cannabis | 17.153            | 4.312      | 1.51E-04 | 4.43E+34         | 5.71E+17                       |
| Pancreas              | THC.Herb    | 15.302            | 0.584      | 1.27E-72 | 4.61E+17         | 2.33E+16                       |
| Hodgkins              | LM.Cannabis | 13.231            | 2.507      | 2.91E-07 | 3.05E+25         | 1.41E+16                       |
| Stomach               | LM.Cannabis | 20.239            | 3.032      | 1.67E-10 | 4.86E+22         | 1.34E+16                       |
| Stomach               | THC.Herb    | 15.302            | 0.599      | 1.20E-70 | 1.68E+17         | 8.51E+15                       |
| Prostate              | THC.Herb    | 15.119            | 0.616      | 2.58E-67 | 3.94E+16         | 1.98E+15                       |
| Breast                | LM.Cannabis | 13.958            | 2.225      | 1.66E-09 | 2.18E+21         | 5.99E+14                       |
| Kidney                | THC.Herb    | 13.038            | 0.583      | 8.04E-61 | 1.32E+15         | 6.66E+13                       |
| Lung                  | THC.Herb    | 9.751             | 0.453      | 8.43E-58 | 3.69E+14         | 1.86E+13                       |
| All Cancers           | THC.Herb    | 9.102             | 1.851      | 4.52E-06 | 3.37E+18         | 1.89E+11                       |
| Breast                | THC.Herb    | 7.398             | 0.440      | 2.23E-42 | 2.83E+11         | 1.43E+10                       |
| Melanoma              | LM.Cannabis | 19.128            | 4.101      | 5.13E-06 | 8.80E+15         | 2.42E+09                       |
| Non-Hodgkins lymphoma | THC.Herb    | 10.009            | 0.679      | 2.68E-35 | 1.24E+10         | 6.20E+08                       |
| Oropharynx            | THC.Herb    | 17.962            | 5.844      | 3.42E-03 | 4.75E+19         | 2.22E+07                       |

|                       |             |        |       |          |          |          |
|-----------------------|-------------|--------|-------|----------|----------|----------|
| Corpus Uteri          | THC.Herb    | 10.573 | 0.871 | 7.86E-27 | 2.06E+08 | 1.06E+07 |
| Cervix                | THC.Herb    | 7.048  | 0.692 | 1.79E-20 | 1.15E+07 | 5.77E+05 |
| Oropharynx            | THC.Resin   | 7.056  | 1.081 | 3.30E-08 | 8.17E+07 | 4.28E+05 |
| Colorectum            | THC.Herb    | 4.636  | 0.467 | 1.03E-19 | 6.43E+06 | 3.36E+05 |
| Myeloma               | THC.Herb    | 4.293  | 1.067 | 7.80E-05 | 1.24E+10 | 2.16E+05 |
| Bladder               | LM.Cannabis | 12.723 | 3.734 | 7.68E-04 | 5.35E+11 | 1.47E+05 |
| Larynx                | LM.Cannabis | 21.062 | 6.232 | 8.46E-04 | 4.31E+11 | 1.19E+05 |
| Oesophagus            | LM.Cannabis | 21.862 | 6.703 | 1.27E-03 | 1.73E+11 | 4.78E+04 |
| Ovary                 | THC.Herb    | 6.596  | 0.867 | 6.26E-13 | 2.24E+05 | 1.13E+04 |
| Larynx                | THC.Herb    | 8.671  | 1.231 | 1.95E-11 | 9.27E+04 | 4.69E+03 |
| Liver                 | THC.Herb    | 6.224  | 1.927 | 1.44E-03 | 1.64E+08 | 2.64E+03 |
| Melanoma              | THC.Herb    | 5.221  | 0.810 | 6.37E-10 | 3.72E+04 | 1.88E+03 |
| Oropharynx            | Income      | 2.004  | 0.345 | 4.46E-07 | 2.90E+02 | 5.37E+01 |
| Bladder               | THC.Herb    | 2.976  | 0.738 | 7.35E-05 | 9.41E+02 | 4.71E+01 |
| Liver                 | LM.Cannabis | 8.543  | 3.824 | 2.66E-02 | 1.45E+11 | 4.45E+01 |
| Oesophagus            | THC.Herb    | 5.217  | 1.324 | 1.07E-04 | 8.14E+02 | 4.07E+01 |
| Testis                | Income      | 0.568  | 0.090 | 1.72E-09 | 1.90E+01 | 9.07E+00 |
| Brain                 | THC.Herb    | 3.806  | 1.278 | 3.20E-03 | 1.89E+02 | 9.00E+00 |
| Gallbladder & Biliary | Income      | 0.600  | 0.123 | 2.23E-06 | 2.35E+01 | 8.33E+00 |
| Thyroid               | THC.Resin   | 1.567  | 0.533 | 3.62E-03 | 6.10E+01 | 5.75E+00 |
| Anus                  | Income      | 0.347  | 0.069 | 1.09E-06 | 1.18E+01 | 5.52E+00 |
| Myeloma               | THC.Resin   | 0.632  | 0.222 | 4.79E-03 | 5.48E+01 | 5.11E+00 |
| Gallbladder & Biliary | Alcohol     | 0.296  | 0.037 | 1.09E-13 | 6.27E+00 | 4.48E+00 |
| Ovary                 | LM.Cannabis | 9.010  | 4.381 | 4.08E-02 | 1.58E+07 | 3.76E+00 |
| Myeloma               | Income      | 0.272  | 0.069 | 1.06E-04 | 7.82E+00 | 3.53E+00 |
| Oropharynx            | Tobacco     | 0.298  | 0.037 | 1.99E-10 | 3.61E+00 | 2.89E+00 |
| All Cancers nNMSC     | THC.Resin   | 0.643  | 0.290 | 2.78E-02 | 4.38E+01 | 2.24E+00 |
| Leukaemia - Myeloid   | Alcohol     | 0.164  | 0.062 | 1.15E-02 | 5.24E+00 | 1.96E+00 |
| Testis                | Alcohol     | 0.126  | 0.035 | 3.89E-04 | 2.70E+00 | 1.83E+00 |
| Hodgkins              | THC.Resin   | 0.564  | 0.263 | 3.29E-02 | 2.32E+01 | 1.80E+00 |

|                       |           |       |       |          |          |          |
|-----------------------|-----------|-------|-------|----------|----------|----------|
| Prostate              | Tobacco   | 0.089 | 0.011 | 2.47E-13 | 1.80E+00 | 1.64E+00 |
| Corpus Uteri          | Tobacco   | 0.085 | 0.016 | 1.05E-07 | 1.59E+00 | 1.43E+00 |
| Breast                | Income    | 0.145 | 0.060 | 1.72E-02 | 2.69E+00 | 1.42E+00 |
| Myeloma               | Tobacco   | 0.029 | 0.006 | 2.86E-06 | 1.60E+00 | 1.42E+00 |
| Anus                  | Alcohol   | 0.066 | 0.027 | 1.40E-02 | 2.18E+00 | 1.36E+00 |
| Breast                | Tobacco   | 0.037 | 0.008 | 1.21E-05 | 1.53E+00 | 1.36E+00 |
| Hodgkins              | Income    | 0.176 | 0.082 | 3.25E-02 | 3.75E+00 | 1.35E+00 |
| Kidney                | Tobacco   | 0.045 | 0.011 | 4.32E-05 | 1.50E+00 | 1.32E+00 |
| Lung                  | Tobacco   | 0.032 | 0.008 | 1.76E-04 | 1.47E+00 | 1.29E+00 |
| Hodgkins              | Tobacco   | 0.023 | 0.007 | 1.13E-03 | 1.45E+00 | 1.25E+00 |
| Non-Hodgkins lymphoma | Tobacco   | 0.041 | 0.013 | 1.63E-03 | 1.42E+00 | 1.23E+00 |
| Pancreas              | Tobacco   | 0.031 | 0.011 | 3.93E-03 | 1.39E+00 | 1.19E+00 |
| Colorectum            | Tobacco   | 0.025 | 0.009 | 4.11E-03 | 1.39E+00 | 1.19E+00 |
| All Cancers           | Tobacco   | 0.039 | 0.017 | 2.56E-02 | 1.68E+00 | 1.19E+00 |
| Stomach               | Tobacco   | 0.030 | 0.011 | 7.66E-03 | 1.37E+00 | 1.17E+00 |
| Ovary                 | Tobacco   | 0.033 | 0.016 | 4.18E-02 | 1.31E+00 | 1.05E+00 |
| Thyroid               | Tobacco   | 0.002 | 0.014 | 8.68E-01 | 1.08E+00 | 1.00E+00 |
| Melanoma              | Tobacco   | 0.010 | 0.015 | 5.08E-01 | 1.16E+00 | 1.00E+00 |
| Brain                 | Income    | 0.021 | 0.175 | 9.06E-01 | 1.19E+00 | 1.00E+00 |
| Oesophagus            | Tobacco   | 0.022 | 0.024 | 3.72E-01 | 1.19E+00 | 1.00E+00 |
| Bladder               | Tobacco   | 0.013 | 0.014 | 3.49E-01 | 1.19E+00 | 1.00E+00 |
| Brain                 | Tobacco   | 0.029 | 0.024 | 2.30E-01 | 1.22E+00 | 1.00E+00 |
| Larynx                | Tobacco   | 0.033 | 0.023 | 1.46E-01 | 1.25E+00 | 1.00E+00 |
| Liver                 | Tobacco   | 0.017 | 0.011 | 1.39E-01 | 1.28E+00 | 1.00E+00 |
| All Cancers nNMSC     | Tobacco   | 0.015 | 0.008 | 6.12E-02 | 1.36E+00 | 1.00E+00 |
| Bladder               | Income    | 0.040 | 0.101 | 6.93E-01 | 1.39E+00 | 1.00E+00 |
| Oropharynx_Broad      | Tobacco   | 0.077 | 0.098 | 4.38E-01 | 1.41E+00 | 1.00E+00 |
| Lung                  | THC.Resin | 0.064 | 0.340 | 8.50E-01 | 1.79E+00 | 1.00E+00 |
| Thyroid               | Alcohol   | 0.119 | 0.064 | 6.56E-02 | 1.92E+00 | 1.00E+00 |
| Melanoma              | Income    | 0.176 | 0.111 | 1.16E-01 | 2.13E+00 | 1.00E+00 |

|                       |             |        |        |          |          |          |
|-----------------------|-------------|--------|--------|----------|----------|----------|
| Thyroid               | Income      | 0.161  | 0.166  | 3.31E-01 | 2.20E+00 | 1.00E+00 |
| Oropharynx_Broad      | Income      | 0.337  | 1.068  | 7.54E-01 | 2.32E+00 | 1.00E+00 |
| Bladder               | THC.Resin   | 0.191  | 0.553  | 7.30E-01 | 2.33E+00 | 1.00E+00 |
| Corpus Uteri          | THC.Resin   | 0.271  | 0.655  | 6.80E-01 | 2.59E+00 | 1.00E+00 |
| Leukaemia - Lymphoid  | Alcohol     | 0.069  | 0.039  | 8.60E-02 | 3.48E+00 | 1.00E+00 |
| Oropharynx_Broad      | THC.Resin   | 0.740  | 5.689  | 8.97E-01 | 4.15E+00 | 1.00E+00 |
| Oesophagus            | THC.Resin   | 0.898  | 0.993  | 3.67E-01 | 5.07E+00 | 1.00E+00 |
| Melanoma              | THC.Resin   | 0.765  | 0.608  | 2.09E-01 | 7.91E+00 | 1.00E+00 |
| Non-Hodgkins lymphoma | THC.Resin   | 0.769  | 0.510  | 1.33E-01 | 1.08E+01 | 1.00E+00 |
| Kidney                | THC.Resin   | 0.826  | 0.437  | 6.02E-02 | 1.68E+01 | 1.00E+00 |
| Testis                | THC.Herb    | 1.009  | 1.400  | 4.72E-01 | 1.14E+02 | 1.00E+00 |
| Thyroid               | THC.Herb    | 1.920  | 2.562  | 4.55E-01 | 1.32E+02 | 1.00E+00 |
| Brain                 | LM.Cannabis | 3.517  | 6.460  | 5.87E-01 | 1.34E+02 | 1.00E+00 |
| Cervix                | LM.Cannabis | 1.909  | 3.498  | 5.86E-01 | 1.35E+02 | 1.00E+00 |
| Anus                  | LM.Cannabis | 0.927  | 2.123  | 6.63E-01 | 2.58E+02 | 1.00E+00 |
| Hodgkins              | THC.Herb    | 1.270  | 1.270  | 3.18E-01 | 5.22E+02 | 1.00E+00 |
| Anus                  | THC.Herb    | 1.926  | 1.069  | 7.28E-02 | 4.85E+04 | 1.00E+00 |
| Corpus Uteri          | LM.Cannabis | 6.268  | 4.329  | 1.49E-01 | 1.13E+05 | 1.00E+00 |
| Oropharynx_Broad      | THC.Herb    | 12.626 | 13.390 | 3.50E-01 | 4.65E+06 | 1.00E+00 |
| Thyroid               | LM.Cannabis | 7.763  | 5.069  | 1.27E-01 | 4.69E+07 | 1.00E+00 |
| Testis                | LM.Cannabis | 4.673  | 2.771  | 9.31E-02 | 2.75E+08 | 1.00E+00 |
| Oropharynx_Broad      | LM.Cannabis | 24.051 | 51.031 | 6.39E-01 | 2.68E+12 | 1.00E+00 |
| Testis                | Tobacco     | -0.001 | 0.008  | 8.54E-01 | 1.08E+00 | -        |
| Prostate              | Income      | -0.005 | 0.084  | 9.49E-01 | 1.13E+00 | -        |
| Colorectum            | Alcohol     | -0.005 | 0.022  | 8.18E-01 | 1.14E+00 | -        |
| Cervix                | Tobacco     | -0.022 | 0.013  | 8.22E-02 | 1.28E+00 | -        |
| Anus                  | Tobacco     | -0.012 | 0.006  | 4.36E-02 | 1.33E+00 | -        |
| Gallbladder & Biliary | Tobacco     | -0.018 | 0.008  | 2.36E-02 | 1.37E+00 | -        |
| Hodgkins              | Alcohol     | -0.021 | 0.032  | 5.00E-01 | 1.43E+00 | -        |
| Oesophagus            | Income      | -0.082 | 0.182  | 6.52E-01 | 1.43E+00 | -        |

|                       |           |        |       |          |          |   |
|-----------------------|-----------|--------|-------|----------|----------|---|
| Oesophagus            | Alcohol   | -0.083 | 0.071 | 2.49E-01 | 1.43E+00 | - |
| Corpus Uteri          | Alcohol   | -0.062 | 0.047 | 1.87E-01 | 1.47E+00 | - |
| Liver                 | Alcohol   | -0.038 | 0.049 | 4.36E-01 | 1.48E+00 | - |
| Myeloma               | Alcohol   | -0.021 | 0.027 | 4.26E-01 | 1.48E+00 | - |
| Larynx                | THC.Resin | -0.107 | 0.923 | 9.08E-01 | 1.54E+00 | - |
| Ovary                 | Alcohol   | -0.080 | 0.047 | 8.86E-02 | 1.57E+00 | - |
| Larynx                | Alcohol   | -0.117 | 0.066 | 8.00E-02 | 1.58E+00 | - |
| Bladder               | Alcohol   | -0.084 | 0.040 | 3.57E-02 | 1.66E+00 | - |
| Brain                 | Alcohol   | -0.148 | 0.069 | 3.24E-02 | 1.67E+00 | - |
| Oropharynx_Broad      | Alcohol   | -0.169 | 0.310 | 5.89E-01 | 1.73E+00 | - |
| Non-Hodgkins lymphoma | Income    | -0.113 | 0.093 | 2.27E-01 | 1.90E+00 | - |
| Melanoma              | Alcohol   | -0.147 | 0.044 | 9.04E-04 | 1.97E+00 | - |
| Cervix                | Alcohol   | -0.132 | 0.037 | 4.74E-04 | 2.01E+00 | - |
| Breast                | Alcohol   | -0.085 | 0.024 | 3.91E-04 | 2.02E+00 | - |
| Oropharynx            | Alcohol   | -0.120 | 0.072 | 1.03E-01 | 2.03E+00 | - |
| Corpus Uteri          | Income    | -0.201 | 0.118 | 8.98E-02 | 2.20E+00 | - |
| Breast                | THC.Resin | -0.109 | 0.330 | 7.41E-01 | 2.28E+00 | - |
| Non-Hodgkins lymphoma | Alcohol   | -0.187 | 0.037 | 6.54E-07 | 2.42E+00 | - |
| Ovary                 | Income    | -0.268 | 0.119 | 2.48E-02 | 2.59E+00 | - |
| Kidney                | Alcohol   | -0.181 | 0.031 | 2.46E-08 | 2.59E+00 | - |
| Pancreas              | THC.Resin | -0.186 | 0.438 | 6.72E-01 | 2.63E+00 | - |
| Stomach               | Alcohol   | -0.193 | 0.032 | 8.76E-09 | 2.65E+00 | - |
| Prostate              | Alcohol   | -0.209 | 0.033 | 1.40E-09 | 2.75E+00 | - |
| Liver                 | Income    | -0.178 | 0.125 | 1.57E-01 | 2.75E+00 | - |
| All Cancers nNMSC     | Alcohol   | -0.116 | 0.024 | 3.18E-06 | 2.88E+00 | - |
| Pancreas              | Alcohol   | -0.232 | 0.031 | 2.80E-12 | 3.07E+00 | - |
| Colorectum            | Income    | -0.188 | 0.063 | 3.09E-03 | 3.07E+00 | - |
| Leukaemia - Lymphoid  | Tobacco   | -0.064 | 0.012 | 1.82E-06 | 3.28E+00 | - |
| Lung                  | Alcohol   | -0.205 | 0.024 | 4.27E-15 | 3.40E+00 | - |
| Brain                 | THC.Resin | -0.587 | 0.959 | 5.41E-01 | 3.45E+00 | - |



|                       |             |         |       |          |          |   |
|-----------------------|-------------|---------|-------|----------|----------|---|
| Prostate              | THC.Resin   | -0.327  | 0.462 | 4.79E-01 | 3.94E+00 | - |
| Larynx                | Income      | -0.685  | 0.169 | 6.69E-05 | 4.10E+00 | - |
| Testis                | THC.Resin   | -0.235  | 0.291 | 4.21E-01 | 4.56E+00 | - |
| Leukaemia - Myeloid   | Tobacco     | -0.170  | 0.018 | 1.05E-11 | 5.46E+00 | - |
| All Cancers           | Alcohol     | -0.245  | 0.042 | 1.03E-07 | 5.63E+00 | - |
| Anus                  | THC.Resin   | -0.246  | 0.223 | 2.70E-01 | 6.72E+00 | - |
| Colorectum            | THC.Resin   | -0.485  | 0.298 | 1.05E-01 | 9.05E+00 | - |
| Kidney                | Income      | -0.652  | 0.080 | 1.83E-14 | 1.05E+01 | - |
| Pancreas              | Income      | -0.714  | 0.080 | 1.19E-16 | 1.24E+01 | - |
| Cervix                | Income      | -0.862  | 0.095 | 4.22E-17 | 1.29E+01 | - |
| Stomach               | Income      | -0.774  | 0.082 | 3.58E-18 | 1.38E+01 | - |
| Ovary                 | THC.Resin   | -1.133  | 0.650 | 8.28E-02 | 1.42E+01 | - |
| Lung                  | Income      | -0.595  | 0.062 | 1.40E-18 | 1.43E+01 | - |
| Leukaemia - Lymphoid  | Income      | -0.197  | 0.147 | 1.88E-01 | 1.46E+01 | - |
| Gallbladder & Biliary | THC.Resin   | -0.516  | 0.309 | 9.64E-02 | 1.65E+01 | - |
| All Cancers           | Income      | -0.466  | 0.195 | 1.92E-02 | 1.66E+01 | - |
| All Cancers nMSC      | Income      | -0.490  | 0.060 | 4.78E-14 | 2.07E+01 | - |
| Liver                 | THC.Resin   | -1.291  | 0.404 | 1.60E-03 | 8.71E+01 | - |
| All Cancers           | THC.Resin   | -0.925  | 0.516 | 7.67E-02 | 1.42E+02 | - |
| Cervix                | THC.Resin   | -2.040  | 0.519 | 1.13E-04 | 1.80E+02 | - |
| Stomach               | THC.Resin   | -1.985  | 0.449 | 1.50E-05 | 3.13E+02 | - |
| Leukaemia - Myeloid   | Income      | -1.042  | 0.233 | 5.77E-05 | 1.71E+03 | - |
| Leukaemia - Myeloid   | LM.Cannabis | -1.220  | 4.108 | 7.68E-01 | 5.44E+03 | - |
| Leukaemia - Lymphoid  | THC.Resin   | -1.416  | 0.528 | 1.04E-02 | 4.35E+06 | - |
| Oropharynx            | LM.Cannabis | -7.738  | 6.586 | 2.46E-01 | 4.44E+08 | - |
| Gallbladder & Biliary | LM.Cannabis | -5.497  | 3.949 | 1.65E-01 | 1.57E+10 | - |
| Leukaemia - Myeloid   | THC.Resin   | -3.689  | 0.840 | 7.16E-05 | 4.86E+10 | - |
| Leukaemia - Lymphoid  | THC.Herb    | -5.101  | 2.309 | 3.25E-02 | 1.34E+23 | - |
| Gallbladder & Biliary | THC.Herb    | -13.766 | 1.840 | 2.40E-12 | 1.20E+25 | - |
| Leukaemia - Myeloid   | THC.Herb    | -10.232 | 3.671 | 7.87E-03 | 1.27E+29 | - |

Supplementary Table S27.: Complete Model Output from Interactive Panel Regression

| Cancer                | Term                 | $\beta$ -Estimate | Std. Error | P-Value  | E-Value Estimate | 95% Lower Bound of the E-Value |
|-----------------------|----------------------|-------------------|------------|----------|------------------|--------------------------------|
| Colorectum            | THC.Herb             | 55.387            | 5.081      | 1.17E-26 | 8.51E+30         | 2.72E+25                       |
| Breast                | THC.Herb             | 37.005            | 3.771      | 4.69E-22 | 7.65E+27         | 2.43E+22                       |
| Gallbladder & Biliary | THC.Herb             | 20.744            | 2.892      | 1.41E-12 | 1.84E+26         | 1.53E+19                       |
| Oropharynx_Broad      | THC.Herb             | 23.856            | 4.274      | 4.15E-08 | 1.31E+26         | 1.17E+17                       |
| All Cancers           | THC.Herb             | 12.034            | 2.019      | 4.45E-09 | 1.41E+23         | 4.48E+15                       |
| Thyroid               | THC.Herb             | 20.386            | 3.101      | 7.61E-11 | 2.72E+21         | 1.40E+15                       |
| Anus                  | THC.Herb             | 13.789            | 2.229      | 8.74E-10 | 1.74E+20         | 8.63E+13                       |
| Testis                | THC.Herb             | 33.843            | 6.241      | 7.22E-08 | 5.43E+17         | 2.80E+11                       |
| Stomach               | THC.Herb             | 24.735            | 4.252      | 7.31E-09 | 4.63E+16         | 1.46E+11                       |
| Oropharynx            | THC.Resin            | 7.349             | 0.625      | 4.34E-22 | 1.92E+11         | 2.86E+09                       |
| Corpus Uteri          | THC.Herb             | 25.436            | 5.293      | 1.70E-06 | 6.37E+13         | 2.03E+08                       |
| Prostate              | THC.Herb             | 24.791            | 5.498      | 7.03E-06 | 9.35E+12         | 2.98E+07                       |
| Oesophagus            | THC.Herb             | 13.982            | 3.228      | 1.58E-05 | 3.05E+12         | 9.59E+06                       |
| Leukaemia - Lymphoid  | LM.Cannabis:THC.Herb | 7.397             | 3.030      | 1.57E-02 | 2.60E+23         | 7.91E+04                       |
| Melanoma              | THC.Herb             | 10.965            | 3.151      | 5.17E-04 | 1.26E+10         | 3.90E+04                       |
| Cervix                | THC.Herb             | 13.081            | 5.359      | 1.48E-02 | 1.47E+07         | 4.57E+01                       |
| Oesophagus            | THC.Resin            | 1.763             | 0.155      | 1.11E-28 | 6.82E+01         | 3.68E+01                       |
| All Cancers nNMSC     | Tobacco:THC.Herb     | 0.527             | 0.059      | 9.85E-19 | 4.86E+01         | 2.39E+01                       |
| Oropharynx            | Income               | 1.024             | 0.191      | 3.81E-07 | 6.72E+01         | 1.82E+01                       |
| Stomach               | LM.Cannabis          | 1.283             | 0.096      | 3.16E-38 | 1.36E+01         | 1.01E+01                       |
| Kidney                | THC.Herb             | 6.010             | 2.758      | 2.95E-02 | 2.69E+06         | 7.94E+00                       |
| Colorectum            | LM.Cannabis          | 1.323             | 0.115      | 2.41E-29 | 1.03E+01         | 7.56E+00                       |
| Myeloma               | THC.Resin            | 0.526             | 0.090      | 6.60E-09 | 1.43E+01         | 7.06E+00                       |

|                       |                              |        |       |          |          |          |
|-----------------------|------------------------------|--------|-------|----------|----------|----------|
| Ovary                 | THC.Herb                     | 9.381  | 4.345 | 3.10E-02 | 2.37E+06 | 6.91E+00 |
| Larynx                | THC.Resin                    | 0.796  | 0.145 | 4.56E-08 | 1.06E+01 | 5.48E+00 |
| Larynx                | LM.Cannabis                  | 0.612  | 0.068 | 8.34E-19 | 6.93E+00 | 5.05E+00 |
| Leukaemia - Lymphoid  | Alcohol                      | 0.164  | 0.021 | 4.81E-13 | 5.96E+00 | 4.29E+00 |
| Breast                | LM.Cannabis                  | 0.628  | 0.086 | 3.61E-13 | 5.32E+00 | 3.83E+00 |
| Thyroid               | LM.Cannabis                  | 0.433  | 0.065 | 4.51E-11 | 5.07E+00 | 3.57E+00 |
| Pancreas              | THC.Herb                     | 5.546  | 2.709 | 4.09E-02 | 1.14E+06 | 3.00E+00 |
| Hodgkins              | LM.Cannabis                  | 0.253  | 0.044 | 1.54E-08 | 4.28E+00 | 2.98E+00 |
| Gallbladder & Biliary | Tobacco:LM.Cannabis:THC.Herb | 0.266  | 0.034 | 7.85E-15 | 3.72E+00 | 2.95E+00 |
| Leukaemia - Myeloid   | LM.Cannabis:THC.Herb         | 10.783 | 5.449 | 4.96E-02 | 1.08E+19 | 2.67E+00 |
| Oropharynx            | Tobacco:THC.Herb             | 0.509  | 0.187 | 7.31E-03 | 1.10E+01 | 2.66E+00 |
| Leukaemia - Myeloid   | Alcohol                      | 0.195  | 0.037 | 6.00E-07 | 3.78E+00 | 2.63E+00 |
| Corpus Uteri          | LM.Cannabis                  | 0.611  | 0.120 | 3.94E-07 | 3.64E+00 | 2.55E+00 |
| Gallbladder & Biliary | LM.Cannabis                  | 0.252  | 0.055 | 5.50E-06 | 3.55E+00 | 2.40E+00 |
| Colorectum            | Tobacco:LM.Cannabis:THC.Herb | 0.453  | 0.069 | 5.71E-11 | 2.96E+00 | 2.37E+00 |
| Myeloma               | Income                       | 0.137  | 0.023 | 6.68E-09 | 2.77E+00 | 2.19E+00 |
| Testis                | Income                       | 0.440  | 0.076 | 7.35E-09 | 2.76E+00 | 2.18E+00 |
| Prostate              | LM.Cannabis                  | 0.512  | 0.125 | 4.20E-05 | 3.05E+00 | 2.08E+00 |
| Prostate              | Income                       | 0.372  | 0.054 | 9.01E-12 | 2.47E+00 | 2.08E+00 |
| Stomach               | Tobacco:LM.Cannabis:THC.Herb | 0.317  | 0.058 | 4.27E-08 | 2.63E+00 | 2.07E+00 |
| Thyroid               | Tobacco:LM.Cannabis:THC.Herb | 0.202  | 0.038 | 9.80E-08 | 2.62E+00 | 2.06E+00 |
| All Cancers           | Alcohol                      | 0.092  | 0.013 | 5.34E-13 | 2.36E+00 | 2.03E+00 |
| Oropharynx            | Tobacco                      | 0.148  | 0.033 | 1.44E-05 | 2.71E+00 | 2.00E+00 |
| Breast                | Tobacco:LM.Cannabis:THC.Herb | 0.267  | 0.051 | 1.98E-07 | 2.54E+00 | 2.00E+00 |
| Anus                  | Tobacco:LM.Cannabis:THC.Herb | 0.138  | 0.027 | 4.91E-07 | 2.55E+00 | 1.98E+00 |
| Breast                | Income                       | 0.216  | 0.037 | 8.22E-09 | 2.25E+00 | 1.87E+00 |
| Non-Hodgkins lymphoma | Tobacco:THC.Herb             | 0.314  | 0.103 | 2.26E-03 | 3.15E+00 | 1.82E+00 |
| Lung                  | Tobacco:THC.Herb             | 0.186  | 0.061 | 2.51E-03 | 3.11E+00 | 1.80E+00 |
| Brain                 | Income                       | 0.136  | 0.027 | 7.04E-07 | 2.09E+00 | 1.72E+00 |
| Gallbladder & Biliary | Tobacco                      | 0.072  | 0.005 | 1.16E-41 | 1.76E+00 | 1.68E+00 |

|                  |                              |       |       |          |          |          |
|------------------|------------------------------|-------|-------|----------|----------|----------|
| Larynx           | Alcohol                      | 0.097 | 0.010 | 8.57E-22 | 1.76E+00 | 1.64E+00 |
| Colorectum       | THC.Resin                    | 0.604 | 0.242 | 1.28E-02 | 3.74E+00 | 1.64E+00 |
| Prostate         | Tobacco:LM.Cannabis:THC.Herb | 0.253 | 0.074 | 6.94E-04 | 2.03E+00 | 1.53E+00 |
| Kidney           | Tobacco:LM.Cannabis:THC.Herb | 0.127 | 0.037 | 7.28E-04 | 2.03E+00 | 1.52E+00 |
| Colorectum       | Tobacco                      | 0.104 | 0.007 | 1.16E-46 | 1.54E+00 | 1.49E+00 |
| Breast           | Tobacco                      | 0.074 | 0.005 | 5.07E-43 | 1.53E+00 | 1.47E+00 |
| Oesophagus       | Tobacco:LM.Cannabis:THC.Herb | 0.136 | 0.044 | 1.86E-03 | 1.96E+00 | 1.45E+00 |
| Stomach          | Tobacco                      | 0.076 | 0.006 | 3.92E-37 | 1.50E+00 | 1.44E+00 |
| Colorectum       | Alcohol                      | 0.103 | 0.017 | 7.58E-10 | 1.54E+00 | 1.41E+00 |
| Pancreas         | Tobacco:LM.Cannabis:THC.Herb | 0.108 | 0.037 | 3.44E-03 | 1.91E+00 | 1.40E+00 |
| Ovary            | LM.Cannabis                  | 0.249 | 0.099 | 1.16E-02 | 2.26E+00 | 1.40E+00 |
| Corpus Uteri     | Tobacco                      | 0.077 | 0.007 | 1.75E-25 | 1.43E+00 | 1.37E+00 |
| Oropharynx       | Tobacco:LM.Cannabis          | 0.060 | 0.020 | 2.75E-03 | 1.76E+00 | 1.37E+00 |
| All Cancers nMSC | Tobacco:LM.Cannabis          | 0.014 | 0.001 | 1.10E-28 | 1.41E+00 | 1.36E+00 |
| Ovary            | Tobacco                      | 0.056 | 0.006 | 3.11E-20 | 1.39E+00 | 1.34E+00 |
| Prostate         | Tobacco                      | 0.068 | 0.008 | 7.41E-19 | 1.38E+00 | 1.33E+00 |
| Corpus Uteri     | Tobacco:LM.Cannabis:THC.Herb | 0.188 | 0.072 | 8.51E-03 | 1.83E+00 | 1.32E+00 |
| Hodgkins         | Tobacco:LM.Cannabis:THC.Herb | 0.067 | 0.026 | 9.15E-03 | 1.84E+00 | 1.31E+00 |
| Bladder          | THC.Resin                    | 0.266 | 0.125 | 3.30E-02 | 3.30E+00 | 1.30E+00 |
| Testis           | Tobacco                      | 0.063 | 0.009 | 2.70E-11 | 1.37E+00 | 1.29E+00 |
| Prostate         | Alcohol                      | 0.075 | 0.018 | 3.02E-05 | 1.41E+00 | 1.27E+00 |
| Oesophagus       | Alcohol                      | 0.041 | 0.011 | 1.26E-04 | 1.39E+00 | 1.25E+00 |
| Stomach          | Alcohol                      | 0.053 | 0.014 | 1.41E-04 | 1.39E+00 | 1.25E+00 |
| Oropharynx_Broad | Tobacco                      | 0.037 | 0.012 | 1.73E-03 | 1.42E+00 | 1.23E+00 |
| Larynx           | Tobacco                      | 0.024 | 0.004 | 9.70E-09 | 1.29E+00 | 1.22E+00 |
| Melanoma         | Tobacco:LM.Cannabis          | 0.020 | 0.002 | 4.91E-18 | 1.25E+00 | 1.22E+00 |
| Liver            | Tobacco:LM.Cannabis          | 0.018 | 0.002 | 3.69E-16 | 1.25E+00 | 1.21E+00 |
| Cervix           | Alcohol                      | 0.059 | 0.018 | 8.14E-04 | 1.36E+00 | 1.21E+00 |
| Breast           | Alcohol                      | 0.041 | 0.012 | 1.06E-03 | 1.35E+00 | 1.20E+00 |
| Lung             | Tobacco:LM.Cannabis          | 0.011 | 0.001 | 5.55E-15 | 1.23E+00 | 1.20E+00 |

|                       |                              |       |       |          |          |          |
|-----------------------|------------------------------|-------|-------|----------|----------|----------|
| Melanoma              | Income                       | 0.073 | 0.031 | 1.83E-02 | 1.60E+00 | 1.19E+00 |
| Bladder               | LM.Cannabis                  | 0.126 | 0.059 | 3.32E-02 | 2.08E+00 | 1.19E+00 |
| Pancreas              | Tobacco:LM.Cannabis          | 0.014 | 0.002 | 1.62E-12 | 1.22E+00 | 1.18E+00 |
| Melanoma              | Tobacco:LM.Cannabis:THC.Herb | 0.095 | 0.043 | 2.66E-02 | 1.73E+00 | 1.18E+00 |
| Oesophagus            | Tobacco:LM.Cannabis          | 0.015 | 0.002 | 7.62E-11 | 1.21E+00 | 1.17E+00 |
| Kidney                | Tobacco:LM.Cannabis          | 0.013 | 0.002 | 2.33E-10 | 1.21E+00 | 1.17E+00 |
| Brain                 | Tobacco:LM.Cannabis:THC.Herb | 0.081 | 0.038 | 3.08E-02 | 1.71E+00 | 1.15E+00 |
| Thyroid               | Alcohol                      | 0.027 | 0.011 | 1.56E-02 | 1.33E+00 | 1.12E+00 |
| Anus                  | Tobacco:LM.Cannabis          | 0.006 | 0.001 | 6.92E-05 | 1.16E+00 | 1.11E+00 |
| Non-Hodgkins lymphoma | Tobacco:LM.Cannabis          | 0.009 | 0.002 | 6.70E-05 | 1.16E+00 | 1.11E+00 |
| Testis                | Tobacco:LM.Cannabis:THC.Herb | 0.154 | 0.076 | 4.22E-02 | 1.69E+00 | 1.09E+00 |
| All Cancers           | Tobacco:LM.Cannabis          | 0.013 | 0.006 | 3.07E-02 | 1.31E+00 | 1.08E+00 |
| Cervix                | Tobacco                      | 0.017 | 0.007 | 1.92E-02 | 1.17E+00 | 1.06E+00 |
| Cervix                | Tobacco:LM.Cannabis          | 0.001 | 0.004 | 8.96E-01 | 1.03E+00 | 1.00E+00 |
| Corpus Uteri          | Income                       | 0.002 | 0.052 | 9.73E-01 | 1.05E+00 | 1.00E+00 |
| Testis                | Alcohol                      | 0.002 | 0.022 | 9.11E-01 | 1.06E+00 | 1.00E+00 |
| Hodgkins              | Alcohol                      | 0.004 | 0.007 | 5.80E-01 | 1.14E+00 | 1.00E+00 |
| Bladder               | Tobacco                      | 0.006 | 0.004 | 8.73E-02 | 1.14E+00 | 1.00E+00 |
| Corpus Uteri          | Alcohol                      | 0.013 | 0.017 | 4.69E-01 | 1.14E+00 | 1.00E+00 |
| Brain                 | Tobacco                      | 0.007 | 0.004 | 6.51E-02 | 1.15E+00 | 1.00E+00 |
| All Cancers nNMSC     | Tobacco:LM.Cannabis:THC.Herb | 0.010 | 0.020 | 5.95E-01 | 1.33E+00 | 1.00E+00 |
| Leukaemia - Myeloid   | Tobacco:LM.Cannabis          | 0.023 | 0.017 | 1.92E-01 | 1.42E+00 | 1.00E+00 |
| Cervix                | Tobacco:LM.Cannabis:THC.Herb | 0.078 | 0.073 | 2.82E-01 | 1.43E+00 | 1.00E+00 |
| Colorectum            | Income                       | 0.079 | 0.050 | 1.13E-01 | 1.45E+00 | 1.00E+00 |
| Lung                  | Tobacco:LM.Cannabis:THC.Herb | 0.031 | 0.026 | 2.33E-01 | 1.46E+00 | 1.00E+00 |
| Larynx                | Tobacco:LM.Cannabis:THC.Herb | 0.050 | 0.041 | 2.21E-01 | 1.47E+00 | 1.00E+00 |
| Bladder               | Tobacco:LM.Cannabis:THC.Herb | 0.045 | 0.035 | 1.99E-01 | 1.49E+00 | 1.00E+00 |
| Kidney                | Tobacco:THC.Herb             | 0.050 | 0.087 | 5.66E-01 | 1.50E+00 | 1.00E+00 |
| Myeloma               | Tobacco:LM.Cannabis:THC.Herb | 0.033 | 0.024 | 1.64E-01 | 1.52E+00 | 1.00E+00 |
| Leukaemia - Lymphoid  | Tobacco:LM.Cannabis          | 0.017 | 0.010 | 7.03E-02 | 1.52E+00 | 1.00E+00 |

|                       |                              |        |        |          |          |          |
|-----------------------|------------------------------|--------|--------|----------|----------|----------|
| Bladder               | Tobacco:THC.Herb             | 0.052  | 0.082  | 5.29E-01 | 1.53E+00 | 1.00E+00 |
| Hodgkins              | Income                       | 0.037  | 0.026  | 1.50E-01 | 1.53E+00 | 1.00E+00 |
| Ovary                 | Tobacco:LM.Cannabis:THC.Herb | 0.087  | 0.059  | 1.40E-01 | 1.54E+00 | 1.00E+00 |
| Oropharynx_Broad      | Income                       | 0.055  | 0.048  | 2.57E-01 | 1.56E+00 | 1.00E+00 |
| Liver                 | Tobacco:LM.Cannabis:THC.Herb | 0.061  | 0.040  | 1.28E-01 | 1.56E+00 | 1.00E+00 |
| Non-Hodgkins lymphoma | Tobacco:LM.Cannabis:THC.Herb | 0.072  | 0.045  | 1.08E-01 | 1.58E+00 | 1.00E+00 |
| All Cancers           | Tobacco:LM.Cannabis:THC.Herb | 0.038  | 0.062  | 5.37E-01 | 1.64E+00 | 1.00E+00 |
| Liver                 | Tobacco:THC.Herb             | 0.076  | 0.107  | 4.80E-01 | 1.66E+00 | 1.00E+00 |
| Brain                 | LM.Cannabis                  | 0.084  | 0.063  | 1.85E-01 | 1.73E+00 | 1.00E+00 |
| Brain                 | Tobacco:THC.Herb             | 0.084  | 0.088  | 3.35E-01 | 1.73E+00 | 1.00E+00 |
| Pancreas              | Tobacco:THC.Herb             | 0.094  | 0.085  | 2.70E-01 | 1.82E+00 | 1.00E+00 |
| Myeloma               | Tobacco:THC.Herb             | 0.069  | 0.062  | 2.67E-01 | 1.93E+00 | 1.00E+00 |
| Myeloma               | LM.Cannabis                  | 0.070  | 0.041  | 8.42E-02 | 1.94E+00 | 1.00E+00 |
| Testis                | LM.Cannabis                  | 0.237  | 0.131  | 7.07E-02 | 1.98E+00 | 1.00E+00 |
| Lung                  | THC.Resin                    | 0.091  | 0.093  | 3.28E-01 | 2.04E+00 | 1.00E+00 |
| Hodgkins              | THC.Resin                    | 0.114  | 0.098  | 2.43E-01 | 2.35E+00 | 1.00E+00 |
| Non-Hodgkins lymphoma | THC.Resin                    | 0.236  | 0.159  | 1.38E-01 | 2.59E+00 | 1.00E+00 |
| Oropharynx_Broad      | Tobacco:LM.Cannabis:THC.Herb | 0.261  | 0.192  | 1.74E-01 | 3.24E+00 | 1.00E+00 |
| Myeloma               | THC.Herb                     | 0.221  | 1.940  | 9.09E-01 | 4.08E+00 | 1.00E+00 |
| Oropharynx_Broad      | LM.Cannabis                  | 0.546  | 0.682  | 4.24E-01 | 7.26E+00 | 1.00E+00 |
| All Cancers           | LM.Cannabis:THC.Herb         | 0.547  | 2.023  | 7.87E-01 | 2.13E+01 | 1.00E+00 |
| Liver                 | THC.Herb                     | 1.938  | 3.383  | 5.67E-01 | 1.59E+02 | 1.00E+00 |
| Bladder               | THC.Herb                     | 2.276  | 2.597  | 3.81E-01 | 5.84E+02 | 1.00E+00 |
| Leukaemia - Lymphoid  | THC.Herb                     | 1.115  | 3.638  | 7.60E-01 | 6.09E+03 | 1.00E+00 |
| Hodgkins              | THC.Herb                     | 2.749  | 2.111  | 1.93E-01 | 3.07E+04 | 1.00E+00 |
| Larynx                | THC.Herb                     | 5.154  | 3.009  | 8.69E-02 | 1.32E+05 | 1.00E+00 |
| Oropharynx            | LM.Cannabis:THC.Herb         | 6.114  | 5.998  | 3.10E-01 | 2.74E+09 | 1.00E+00 |
| Kaposi                | Tobacco                      | 6.014  | 25.670 | 8.16E-01 | 1.67E+12 | 1.00E+00 |
| Leukaemia - Myeloid   | THC.Herb                     | 9.240  | 6.543  | 1.60E-01 | 2.25E+16 | 1.00E+00 |
| Kaposi                | Tobacco:LM.Cannabis:THC.Herb | 21.495 | 27.173 | 4.32E-01 | 8.17E+42 | 1.00E+00 |

|                       |                      |         |          |          |           |          |
|-----------------------|----------------------|---------|----------|----------|-----------|----------|
| Kaposi                | LM.Cannabis          | 75.351  | 116.035  | 5.18E-01 | 4.77E+149 | 1.00E+00 |
| Kaposi                | LM.Cannabis:THC.Herb | 551.469 | 1246.298 | 6.60E-01 | Inf       | 1.00E+00 |
| Myeloma               | Tobacco:LM.Cannabis  | -0.001  | 0.001    | 5.45E-01 | 1.06E+00  | -        |
| Bladder               | Tobacco:LM.Cannabis  | -0.003  | 0.002    | 1.52E-01 | 1.09E+00  | -        |
| Brain                 | Tobacco:LM.Cannabis  | -0.003  | 0.002    | 9.85E-02 | 1.10E+00  | -        |
| Thyroid               | Income               | -0.004  | 0.038    | 9.14E-01 | 1.11E+00  | -        |
| Testis                | Tobacco:LM.Cannabis  | -0.009  | 0.004    | 2.78E-02 | 1.12E+00  | -        |
| Hodgkins              | Tobacco              | -0.004  | 0.003    | 2.60E-01 | 1.13E+00  | -        |
| Ovary                 | Tobacco:LM.Cannabis  | -0.009  | 0.003    | 6.14E-03 | 1.13E+00  | -        |
| Prostate              | Tobacco:LM.Cannabis  | -0.016  | 0.004    | 7.03E-05 | 1.16E+00  | -        |
| Corpus Uteri          | Tobacco:LM.Cannabis  | -0.019  | 0.004    | 6.98E-07 | 1.18E+00  | -        |
| Hodgkins              | Tobacco:LM.Cannabis  | -0.007  | 0.001    | 3.26E-07 | 1.19E+00  | -        |
| Thyroid               | Tobacco:LM.Cannabis  | -0.013  | 0.002    | 9.72E-10 | 1.21E+00  | -        |
| Thyroid               | Tobacco              | -0.013  | 0.005    | 4.15E-03 | 1.21E+00  | -        |
| Larynx                | Tobacco:LM.Cannabis  | -0.015  | 0.002    | 1.82E-12 | 1.22E+00  | -        |
| Breast                | Tobacco:LM.Cannabis  | -0.019  | 0.003    | 1.62E-12 | 1.22E+00  | -        |
| Gallbladder & Biliary | Tobacco:LM.Cannabis  | -0.012  | 0.002    | 2.18E-11 | 1.22E+00  | -        |
| Oropharynx_Broad      | Tobacco:LM.Cannabis  | -0.015  | 0.021    | 4.70E-01 | 1.24E+00  | -        |
| Ovary                 | Income               | -0.026  | 0.043    | 5.38E-01 | 1.24E+00  | -        |
| Ovary                 | Alcohol              | -0.027  | 0.014    | 5.94E-02 | 1.25E+00  | -        |
| Kidney                | Tobacco              | -0.018  | 0.004    | 1.78E-06 | 1.26E+00  | -        |
| All Cancers           | Tobacco              | -0.010  | 0.003    | 4.35E-04 | 1.27E+00  | -        |
| Anus                  | Tobacco              | -0.014  | 0.003    | 2.93E-05 | 1.27E+00  | -        |
| Oesophagus            | Tobacco              | -0.024  | 0.004    | 5.91E-08 | 1.28E+00  | -        |
| Lung                  | Tobacco              | -0.015  | 0.003    | 5.65E-08 | 1.28E+00  | -        |
| Colorectum            | Tobacco:LM.Cannabis  | -0.039  | 0.004    | 1.08E-25 | 1.28E+00  | -        |
| Myeloma               | Alcohol              | -0.013  | 0.007    | 5.53E-02 | 1.28E+00  | -        |
| Pancreas              | Tobacco              | -0.022  | 0.004    | 5.76E-09 | 1.29E+00  | -        |
| Stomach               | Tobacco:LM.Cannabis  | -0.038  | 0.003    | 2.14E-34 | 1.31E+00  | -        |
| Melanoma              | Tobacco              | -0.030  | 0.004    | 3.36E-12 | 1.33E+00  | -        |

|                       |                  |        |       |          |          |   |
|-----------------------|------------------|--------|-------|----------|----------|---|
| Oropharynx_Broad      | Alcohol          | -0.027 | 0.045 | 5.52E-01 | 1.34E+00 | - |
| Myeloma               | Tobacco          | -0.018 | 0.003 | 1.43E-09 | 1.34E+00 | - |
| Brain                 | Alcohol          | -0.031 | 0.009 | 7.42E-04 | 1.36E+00 | - |
| Non-Hodgkins lymphoma | Tobacco          | -0.048 | 0.004 | 1.87E-25 | 1.43E+00 | - |
| Liver                 | Tobacco          | -0.049 | 0.005 | 1.39E-22 | 1.48E+00 | - |
| Cervix                | LM.Cannabis      | -0.105 | 0.121 | 3.89E-01 | 1.53E+00 | - |
| Anus                  | Alcohol          | -0.040 | 0.008 | 4.55E-07 | 1.55E+00 | - |
| Oesophagus            | Income           | -0.079 | 0.032 | 1.25E-02 | 1.62E+00 | - |
| Ovary                 | Tobacco:THC.Herb | -0.109 | 0.137 | 4.28E-01 | 1.63E+00 | - |
| Non-Hodgkins lymphoma | Alcohol          | -0.083 | 0.011 | 2.30E-14 | 1.64E+00 | - |
| Gallbladder & Biliary | Income           | -0.063 | 0.033 | 5.28E-02 | 1.69E+00 | - |
| Anus                  | Income           | -0.057 | 0.027 | 3.51E-02 | 1.71E+00 | - |
| Lung                  | Alcohol          | -0.057 | 0.006 | 7.00E-19 | 1.71E+00 | - |
| Leukaemia - Myeloid   | Tobacco          | -0.049 | 0.026 | 6.30E-02 | 1.73E+00 | - |
| Bladder               | Income           | -0.088 | 0.026 | 5.83E-04 | 1.80E+00 | - |
| Kidney                | Alcohol          | -0.100 | 0.009 | 5.42E-27 | 1.84E+00 | - |
| Larynx                | Tobacco:THC.Herb | -0.111 | 0.095 | 2.40E-01 | 1.86E+00 | - |
| Leukaemia - Lymphoid  | Tobacco          | -0.034 | 0.014 | 2.18E-02 | 1.86E+00 | - |
| Melanoma              | Alcohol          | -0.119 | 0.010 | 4.98E-29 | 1.87E+00 | - |
| All Cancers nNMSC     | Tobacco          | -0.044 | 0.004 | 1.73E-31 | 1.93E+00 | - |
| Larynx                | Income           | -0.123 | 0.030 | 3.24E-05 | 1.93E+00 | - |
| Cervix                | Income           | -0.230 | 0.053 | 1.35E-05 | 1.97E+00 | - |
| Bladder               | Alcohol          | -0.121 | 0.009 | 6.11E-43 | 2.05E+00 | - |
| Cervix                | Tobacco:THC.Herb | -0.253 | 0.169 | 1.34E-01 | 2.06E+00 | - |
| Pancreas              | Alcohol          | -0.131 | 0.009 | 1.15E-45 | 2.08E+00 | - |
| Leukaemia - Lymphoid  | THC.Resin        | -0.044 | 0.397 | 9.12E-01 | 2.09E+00 | - |
| Hodgkins              | Tobacco:THC.Herb | -0.091 | 0.068 | 1.80E-01 | 2.09E+00 | - |
| Liver                 | Alcohol          | -0.158 | 0.012 | 3.50E-39 | 2.22E+00 | - |
| Non-Hodgkins lymphoma | Income           | -0.204 | 0.032 | 3.24E-10 | 2.37E+00 | - |
| Gallbladder & Biliary | Alcohol          | -0.143 | 0.011 | 7.26E-39 | 2.39E+00 | - |



|                       |                              |        |       |          |          |   |
|-----------------------|------------------------------|--------|-------|----------|----------|---|
| Liver                 | Income                       | -0.205 | 0.040 | 3.08E-07 | 2.56E+00 | - |
| Melanoma              | Tobacco:THC.Herb             | -0.238 | 0.099 | 1.67E-02 | 2.65E+00 | - |
| Breast                | THC.Resin                    | -0.314 | 0.180 | 8.23E-02 | 2.82E+00 | - |
| All Cancers nNMSC     | Alcohol                      | -0.092 | 0.005 | 5.85E-81 | 2.89E+00 | - |
| Oropharynx            | Alcohol                      | -0.167 | 0.036 | 1.01E-05 | 2.95E+00 | - |
| Kaposi                | Income                       | -0.126 | 0.855 | 8.83E-01 | 2.95E+00 | - |
| Stomach               | Income                       | -0.381 | 0.042 | 2.75E-19 | 2.97E+00 | - |
| All Cancers           | Income                       | -0.133 | 0.024 | 4.77E-08 | 2.97E+00 | - |
| Non-Hodgkins lymphoma | LM.Cannabis                  | -0.304 | 0.074 | 4.52E-05 | 3.08E+00 | - |
| Prostate              | Tobacco:THC.Herb             | -0.550 | 0.173 | 1.54E-03 | 3.23E+00 | - |
| All Cancers nNMSC     | LM.Cannabis:THC.Herb         | -0.112 | 0.626 | 8.58E-01 | 3.37E+00 | - |
| Pancreas              | Income                       | -0.293 | 0.027 | 4.74E-27 | 3.44E+00 | - |
| Melanoma              | THC.Resin                    | -0.348 | 0.152 | 2.25E-02 | 3.51E+00 | - |
| Lung                  | Income                       | -0.218 | 0.019 | 8.37E-29 | 3.55E+00 | - |
| Oesophagus            | Tobacco:THC.Herb             | -0.369 | 0.102 | 2.97E-04 | 3.61E+00 | - |
| Anus                  | LM.Cannabis                  | -0.222 | 0.047 | 2.63E-06 | 3.61E+00 | - |
| Kidney                | Income                       | -0.317 | 0.027 | 3.13E-30 | 3.63E+00 | - |
| Corpus Uteri          | Tobacco:THC.Herb             | -0.616 | 0.167 | 2.33E-04 | 3.67E+00 | - |
| Stomach               | Tobacco:THC.Herb             | -0.494 | 0.134 | 2.32E-04 | 3.67E+00 | - |
| Leukaemia - Lymphoid  | Income                       | -0.111 | 0.093 | 2.33E-01 | 3.88E+00 | - |
| Leukaemia - Myeloid   | Income                       | -0.208 | 0.167 | 2.14E-01 | 4.03E+00 | - |
| Leukaemia - Myeloid   | Tobacco:LM.Cannabis:THC.Herb | -0.231 | 0.159 | 1.49E-01 | 4.48E+00 | - |
| Oesophagus            | LM.Cannabis                  | -0.512 | 0.073 | 4.08E-12 | 5.03E+00 | - |
| Kidney                | LM.Cannabis                  | -0.475 | 0.063 | 5.14E-14 | 5.56E+00 | - |
| Anus                  | Tobacco:THC.Herb             | -0.352 | 0.071 | 9.03E-07 | 5.90E+00 | - |
| Pancreas              | LM.Cannabis                  | -0.490 | 0.061 | 2.95E-15 | 5.91E+00 | - |
| Liver                 | LM.Cannabis                  | -0.537 | 0.069 | 1.66E-14 | 6.19E+00 | - |
| Testis                | Tobacco:THC.Herb             | -1.028 | 0.200 | 3.15E-07 | 6.22E+00 | - |
| Lung                  | LM.Cannabis                  | -0.371 | 0.044 | 1.02E-16 | 6.31E+00 | - |
| Leukaemia - Lymphoid  | Tobacco:LM.Cannabis:THC.Herb | -0.182 | 0.089 | 4.12E-02 | 6.88E+00 | - |

|                       |                              |        |       |          |          |   |
|-----------------------|------------------------------|--------|-------|----------|----------|---|
| Leukaemia - Lymphoid  | Tobacco:THC.Herb             | -0.184 | 0.095 | 5.43E-02 | 6.96E+00 | - |
| All Cancers           | Tobacco:THC.Herb             | -0.312 | 0.068 | 5.62E-06 | 7.29E+00 | - |
| All Cancers nNMSC     | Income                       | -0.240 | 0.014 | 1.39E-57 | 8.06E+00 | - |
| Melanoma              | LM.Cannabis                  | -0.751 | 0.072 | 7.40E-25 | 8.86E+00 | - |
| Leukaemia - Myeloid   | Tobacco:THC.Herb             | -0.391 | 0.170 | 2.30E-02 | 9.04E+00 | - |
| Thyroid               | Tobacco:THC.Herb             | -0.656 | 0.099 | 6.03E-11 | 9.04E+00 | - |
| Oropharynx_Broad      | Tobacco:THC.Herb             | -0.632 | 0.141 | 8.88E-06 | 9.14E+00 | - |
| Oropharynx            | Tobacco:LM.Cannabis:THC.Herb | -0.463 | 0.174 | 8.89E-03 | 9.30E+00 | - |
| Testis                | THC.Resin                    | -1.403 | 0.289 | 1.40E-06 | 1.00E+01 | - |
| Liver                 | LM.Cannabis:THC.Herb         | -0.752 | 1.283 | 5.58E-01 | 1.04E+01 | - |
| Stomach               | THC.Resin                    | -1.228 | 0.205 | 2.43E-09 | 1.25E+01 | - |
| Breast                | Tobacco:THC.Herb             | -1.091 | 0.119 | 1.57E-19 | 1.25E+01 | - |
| Colorectum            | Tobacco:THC.Herb             | -1.679 | 0.160 | 7.81E-25 | 1.64E+01 | - |
| Oropharynx_Broad      | THC.Resin                    | -0.866 | 0.490 | 7.79E-02 | 1.68E+01 | - |
| Corpus Uteri          | THC.Resin                    | -1.807 | 0.253 | 1.35E-12 | 1.77E+01 | - |
| Cervix                | LM.Cannabis:THC.Herb         | -1.859 | 2.312 | 4.21E-01 | 1.84E+01 | - |
| Brain                 | THC.Resin                    | -1.029 | 0.134 | 2.63E-14 | 2.15E+01 | - |
| Brain                 | THC.Herb                     | -1.029 | 2.780 | 7.11E-01 | 2.15E+01 | - |
| Gallbladder & Biliary | Tobacco:THC.Herb             | -0.852 | 0.094 | 5.93E-19 | 2.28E+01 | - |
| Lung                  | LM.Cannabis:THC.Herb         | -0.835 | 0.837 | 3.18E-01 | 3.15E+01 | - |
| All Cancers           | LM.Cannabis                  | -0.637 | 0.204 | 1.90E-03 | 3.19E+01 | - |
| Prostate              | THC.Resin                    | -2.389 | 0.262 | 2.71E-19 | 3.28E+01 | - |
| All Cancers nNMSC     | LM.Cannabis                  | -0.479 | 0.041 | 4.31E-30 | 3.61E+01 | - |
| Ovary                 | THC.Resin                    | -2.029 | 0.209 | 1.20E-21 | 4.07E+01 | - |
| Lung                  | THC.Herb                     | -0.983 | 1.949 | 6.14E-01 | 5.18E+01 | - |
| Oropharynx            | LM.Cannabis                  | -1.004 | 0.688 | 1.47E-01 | 6.28E+01 | - |
| Cervix                | THC.Resin                    | -2.905 | 0.258 | 2.64E-28 | 6.64E+01 | - |
| Leukaemia - Myeloid   | LM.Cannabis                  | -1.025 | 0.601 | 9.02E-02 | 1.20E+02 | - |
| All Cancers           | THC.Resin                    | -0.956 | 0.111 | 7.52E-17 | 1.30E+02 | - |
| Ovary                 | LM.Cannabis:THC.Herb         | -2.828 | 1.874 | 1.32E-01 | 1.35E+02 | - |

|                       |                      |         |       |           |          |   |
|-----------------------|----------------------|---------|-------|-----------|----------|---|
| Non-Hodgkins lymphoma | LM.Cannabis:THC.Herb | -2.199  | 1.420 | 1.22E-01  | 1.62E+02 | - |
| Melanoma              | LM.Cannabis:THC.Herb | -2.220  | 1.365 | 1.04E-01  | 1.92E+02 | - |
| Kidney                | THC.Resin            | -1.965  | 0.133 | 2.28E-46  | 2.01E+02 | - |
| Anus                  | THC.Resin            | -1.395  | 0.105 | 1.29E-37  | 2.08E+02 | - |
| All Cancers nMSC      | THC.Resin            | -0.788  | 0.072 | 5.17E-27  | 2.38E+02 | - |
| Leukaemia - Lymphoid  | LM.Cannabis          | -0.699  | 0.334 | 3.82E-02  | 3.05E+02 | - |
| Myeloma               | LM.Cannabis:THC.Herb | -1.345  | 0.750 | 7.34E-02  | 3.38E+02 | - |
| Testis                | LM.Cannabis:THC.Herb | -4.364  | 2.413 | 7.08E-02  | 3.54E+02 | - |
| Pancreas              | THC.Resin            | -2.207  | 0.130 | 6.68E-59  | 3.91E+02 | - |
| Larynx                | LM.Cannabis:THC.Herb | -2.452  | 1.298 | 5.91E-02  | 3.91E+02 | - |
| Brain                 | LM.Cannabis:THC.Herb | -2.508  | 1.199 | 3.66E-02  | 6.90E+02 | - |
| Leukaemia - Myeloid   | THC.Resin            | -1.504  | 0.714 | 3.67E-02  | 8.20E+02 | - |
| Thyroid               | THC.Resin            | -2.765  | 0.144 | 3.01E-71  | 1.47E+03 | - |
| Hodgkins              | LM.Cannabis:THC.Herb | -1.914  | 0.816 | 1.93E-02  | 1.64E+03 | - |
| Bladder               | LM.Cannabis:THC.Herb | -2.900  | 1.120 | 9.73E-03  | 2.77E+03 | - |
| Gallbladder & Biliary | THC.Resin            | -2.528  | 0.151 | 5.67E-56  | 2.92E+03 | - |
| Pancreas              | LM.Cannabis:THC.Herb | -3.157  | 1.169 | 6.98E-03  | 3.79E+03 | - |
| Corpus Uteri          | LM.Cannabis:THC.Herb | -6.231  | 2.274 | 6.22E-03  | 4.06E+03 | - |
| Kidney                | LM.Cannabis:THC.Herb | -3.292  | 1.190 | 5.74E-03  | 4.55E+03 | - |
| Oesophagus            | LM.Cannabis:THC.Herb | -4.163  | 1.393 | 2.84E-03  | 8.48E+03 | - |
| Prostate              | LM.Cannabis:THC.Herb | -7.847  | 2.362 | 9.16E-04  | 2.05E+04 | - |
| Thyroid               | LM.Cannabis:THC.Herb | -4.614  | 1.199 | 1.26E-04  | 1.21E+05 | - |
| Liver                 | THC.Resin            | -4.908  | 0.155 | 6.74E-156 | 1.31E+05 | - |
| Non-Hodgkins lymphoma | THC.Herb             | -6.009  | 3.250 | 6.46E-02  | 3.33E+05 | - |
| Anus                  | LM.Cannabis:THC.Herb | -3.630  | 0.876 | 3.68E-05  | 3.55E+05 | - |
| Breast                | LM.Cannabis:THC.Herb | -8.263  | 1.624 | 4.08E-07  | 2.88E+06 | - |
| Stomach               | LM.Cannabis:THC.Herb | -11.388 | 1.834 | 6.93E-10  | 6.84E+07 | - |
| Colorectum            | LM.Cannabis:THC.Herb | -15.361 | 2.183 | 3.01E-12  | 6.25E+08 | - |
| Oropharynx_Broad      | LM.Cannabis:THC.Herb | -8.620  | 6.233 | 1.67E-01  | 4.27E+09 | - |
| Gallbladder & Biliary | LM.Cannabis:THC.Herb | -7.970  | 1.063 | 1.40E-13  | 1.89E+10 | - |

|                   |                     |           |          |          |          |   |
|-------------------|---------------------|-----------|----------|----------|----------|---|
| Kaposi            | Tobacco:LM.Cannabis | -7.744    | 12.776   | 5.47E-01 | 4.49E+15 | - |
| Oropharynx        | THC.Herb            | -11.954   | 7.420    | 1.10E-01 | 1.47E+18 | - |
| All Cancers nNMSC | THC.Herb            | -11.441   | 1.865    | 1.14E-09 | 2.88E+30 | - |
| Kaposi            | THC.Herb            | -2685.723 | 5511.062 | 6.28E-01 | Inf      | - |
| Kaposi            | THC.Resin           | -447.119  | 537.032  | 4.08E-01 | Inf      | - |

Supplementary Table S28.: Complete Model Output from  
Interactive Panel Regression at Two Temporal Lags

| Cancer                | Term                 | $\beta$ -Estimate | Std. Error | P-Value  | P.Adj.Holm | E-Value Estimate | 95% Lower Bound of the E-Value |
|-----------------------|----------------------|-------------------|------------|----------|------------|------------------|--------------------------------|
| Colorectum            | Herb.THC             | 71.633            | 6.427      | 1.57E-27 | 4.30E-25   | 1.51E+38         | 3.40E+31                       |
| Breast                | Herb.THC             | 46.987            | 4.896      | 4.60E-21 | 1.21E-18   | 9.34E+32         | 2.05E+26                       |
| Gallbladder & Biliary | Herb.THC             | 23.007            | 2.984      | 3.78E-14 | 9.34E-12   | 1.44E+32         | 1.19E+24                       |
| Anus                  | Herb.THC             | 20.215            | 2.753      | 4.83E-13 | 1.16E-10   | 4.88E+28         | 1.34E+21                       |
| Thyroid               | Herb.THC             | 24.546            | 3.529      | 6.92E-12 | 1.59E-09   | 1.56E+27         | 4.27E+19                       |
| All Cancers           | Herb.THC             | 13.291            | 2.291      | 1.17E-08 | 2.42E-06   | 1.44E+26         | 2.75E+17                       |
| Oropharynx            | Resin.THC            | 9.983             | 1.206      | 4.86E-13 | 1.16E-10   | 5.94E+21         | 4.99E+16                       |
| Oropharynx_Broad      | Herb.THC             | 27.243            | 6.396      | 2.56E-05 | 0.0045042  | 1.58E+29         | 8.46E+15                       |
| Testis                | Herb.THC             | 39.967            | 8.119      | 1.02E-06 | 1.98E-04   | 2.14E+19         | 5.87E+11                       |
| Oesophagus            | Herb.THC             | 20.767            | 3.903      | 1.23E-07 | 2.46E-05   | 2.47E+18         | 5.52E+11                       |
| Stomach               | Herb.THC             | 25.533            | 5.249      | 1.30E-06 | 2.45E-04   | 6.92E+16         | 1.55E+10                       |
| Myeloma               | Herb.THC             | 7.103             | 2.279      | 1.89E-03 | 0.2677484  | 2.25E+12         | 6.17E+04                       |
| Melanoma              | Herb.THC             | 12.545            | 3.908      | 1.36E-03 | 0.1974942  | 1.72E+11         | 3.74E+04                       |
| Prostate              | Herb.THC             | 21.614            | 7.110      | 2.42E-03 | 0.3337366  | 4.28E+10         | 9.64E+03                       |
| Corpus Uteri          | Herb.THC             | 19.252            | 6.845      | 4.99E-03 | 0.6491038  | 7.24E+09         | 1.63E+03                       |
| Oropharynx            | LM.Cannabis:Herb.THC | 18.029            | 8.556      | 3.75E-02 | 1          | 1.20E+39         | 1.21E+03                       |
| Liver                 | Herb.THC             | 9.628             | 3.773      | 1.09E-02 | 1          | 3.27E+10         | 4.84E+02                       |
| Oropharynx            | Income               | 1.334             | 0.259      | 1.21E-06 | 2.30E-04   | 1.48E+03         | 1.20E+02                       |
| Oropharynx            | Tobacco:Herb.THC     | 1.171             | 0.183      | 4.80E-09 | 1.01E-06   | 6.59E+02         | 1.11E+02                       |
| Kidney                | Herb.THC             | 7.611             | 3.189      | 1.71E-02 | 1          | 2.61E+08         | 5.79E+01                       |
| Oesophagus            | Resin.THC            | 2.014             | 0.174      | 2.48E-29 | 6.84E-27   | 1.13E+02         | 5.68E+01                       |

|                       |                              |       |       |          |           |          |          |
|-----------------------|------------------------------|-------|-------|----------|-----------|----------|----------|
| Hodgkins              | Herb.THC                     | 5.964 | 2.585 | 2.13E-02 | 1         | 1.66E+09 | 4.50E+01 |
| All Cancers nMSC      | Tobacco:Herb.THC             | 0.550 | 0.072 | 3.83E-14 | 9.42E-12  | 6.84E+01 | 2.74E+01 |
| Myeloma               | Resin.THC                    | 0.701 | 0.100 | 5.36E-12 | 1.24E-09  | 3.04E+01 | 1.39E+01 |
| Colorectum            | LM.Cannabis                  | 1.849 | 0.144 | 1.17E-35 | 3.34E-33  | 1.85E+01 | 1.30E+01 |
| Stomach               | LM.Cannabis                  | 1.415 | 0.117 | 1.01E-31 | 2.83E-29  | 1.60E+01 | 1.12E+01 |
| Larynx                | Resin.THC                    | 1.146 | 0.165 | 5.97E-12 | 1.38E-09  | 2.22E+01 | 1.09E+01 |
| Bladder               | Herb.THC                     | 6.672 | 3.094 | 3.12E-02 | 1         | 4.30E+07 | 9.07E+00 |
| Thyroid               | LM.Cannabis                  | 0.650 | 0.074 | 9.63E-18 | 2.46E-15  | 9.78E+00 | 6.61E+00 |
| Larynx                | LM.Cannabis                  | 0.756 | 0.083 | 2.19E-19 | 5.72E-17  | 9.40E+00 | 6.51E+00 |
| Breast                | LM.Cannabis                  | 0.834 | 0.110 | 5.40E-14 | 1.31E-11  | 7.07E+00 | 4.84E+00 |
| Hodgkins              | LM.Cannabis                  | 0.335 | 0.054 | 1.12E-09 | 2.41E-07  | 5.78E+00 | 3.81E+00 |
| Leukaemia - Lymphoid  | Alcohol                      | 0.138 | 0.026 | 6.53E-07 | 1.27E-04  | 6.29E+00 | 3.73E+00 |
| Colorectum            | Resin.THC                    | 1.177 | 0.285 | 3.88E-05 | 0.0066822 | 7.85E+00 | 3.67E+00 |
| Leukaemia - Myeloid   | Alcohol                      | 0.262 | 0.053 | 2.23E-06 | 4.13E-04  | 5.85E+00 | 3.45E+00 |
| Colorectum            | Tobacco:LM.Cannabis:Herb.THC | 0.726 | 0.088 | 3.53E-16 | 8.87E-14  | 4.27E+00 | 3.34E+00 |
| Bladder               | Resin.THC                    | 0.515 | 0.138 | 2.03E-04 | 0.0328647 | 6.83E+00 | 3.12E+00 |
| Gallbladder & Biliary | Tobacco:LM.Cannabis:Herb.THC | 0.265 | 0.037 | 1.35E-12 | 3.17E-10  | 4.09E+00 | 3.10E+00 |
| Thyroid               | Tobacco:LM.Cannabis:Herb.THC | 0.319 | 0.044 | 8.30E-13 | 1.96E-10  | 3.90E+00 | 3.00E+00 |
| Anus                  | Tobacco:LM.Cannabis:Herb.THC | 0.213 | 0.034 | 8.03E-10 | 1.75E-07  | 3.39E+00 | 2.59E+00 |
| Corpus Uteri          | LM.Cannabis                  | 0.666 | 0.153 | 1.43E-05 | 0.00254   | 3.71E+00 | 2.41E+00 |
| Hodgkins              | Resin.THC                    | 0.343 | 0.114 | 2.61E-03 | 0.3503521 | 5.98E+00 | 2.40E+00 |
| Breast                | Tobacco:LM.Cannabis:Herb.THC | 0.381 | 0.067 | 1.96E-08 | 4.02E-06  | 3.08E+00 | 2.34E+00 |
| Lung                  | Resin.THC                    | 0.301 | 0.100 | 2.59E-03 | 0.3494918 | 5.15E+00 | 2.25E+00 |
| Testis                | Income                       | 0.522 | 0.107 | 1.21E-06 | 2.30E-04  | 2.94E+00 | 2.17E+00 |
| All Cancers           | Tobacco:LM.Cannabis:Herb.THC | 0.215 | 0.072 | 2.89E-03 | 0.3837699 | 4.69E+00 | 2.14E+00 |
| Stomach               | Tobacco:LM.Cannabis:Herb.THC | 0.362 | 0.072 | 5.39E-07 | 1.06E-04  | 2.82E+00 | 2.13E+00 |
| Oropharynx            | Tobacco                      | 0.111 | 0.027 | 6.00E-05 | 0.0101373 | 2.86E+00 | 2.02E+00 |
| Prostate              | LM.Cannabis                  | 0.554 | 0.159 | 5.01E-04 | 0.0760975 | 3.08E+00 | 1.94E+00 |
| Gallbladder & Biliary | Tobacco                      | 0.093 | 0.006 | 1.26E-45 | 3.66E-43  | 2.02E+00 | 1.91E+00 |
| Gallbladder & Biliary | LM.Cannabis                  | 0.200 | 0.062 | 1.30E-03 | 0.1894048 | 3.19E+00 | 1.89E+00 |

|                       |                              |       |       |          |           |          |          |
|-----------------------|------------------------------|-------|-------|----------|-----------|----------|----------|
| All Cancers           | Alcohol                      | 0.072 | 0.011 | 6.55E-10 | 1.45E-07  | 2.11E+00 | 1.81E+00 |
| Testis                | LM.Cannabis                  | 0.533 | 0.171 | 1.84E-03 | 0.2633628 | 2.99E+00 | 1.80E+00 |
| Hodgkins              | Tobacco:LM.Cannabis:Herb.THC | 0.125 | 0.032 | 1.04E-04 | 0.0172133 | 2.45E+00 | 1.79E+00 |
| Larynx                | Alcohol                      | 0.121 | 0.012 | 1.24E-23 | 3.33E-21  | 1.91E+00 | 1.76E+00 |
| Kidney                | Tobacco:LM.Cannabis:Herb.THC | 0.162 | 0.044 | 2.13E-04 | 0.0340732 | 2.34E+00 | 1.71E+00 |
| Brain                 | Income                       | 0.148 | 0.033 | 1.09E-05 | 0.0019595 | 2.15E+00 | 1.70E+00 |
| Myeloma               | Tobacco:LM.Cannabis:Herb.THC | 0.103 | 0.028 | 2.89E-04 | 0.0450391 | 2.36E+00 | 1.70E+00 |
| Oesophagus            | Tobacco:LM.Cannabis:Herb.THC | 0.195 | 0.053 | 2.68E-04 | 0.0424001 | 2.32E+00 | 1.69E+00 |
| Breast                | Income                       | 0.200 | 0.048 | 2.98E-05 | 0.0051635 | 2.10E+00 | 1.66E+00 |
| Liver                 | Tobacco:LM.Cannabis:Herb.THC | 0.157 | 0.046 | 6.92E-04 | 0.1038684 | 2.29E+00 | 1.63E+00 |
| Non-Hodgkins lymphoma | Tobacco:Herb.THC             | 0.344 | 0.132 | 9.62E-03 | 1         | 3.27E+00 | 1.63E+00 |
| Oropharynx            | Tobacco:LM.Cannabis          | 0.086 | 0.028 | 2.24E-03 | 0.3107643 | 2.44E+00 | 1.63E+00 |
| Myeloma               | LM.Cannabis                  | 0.135 | 0.048 | 5.05E-03 | 0.6516111 | 2.77E+00 | 1.62E+00 |
| Prostate              | Income                       | 0.279 | 0.069 | 5.83E-05 | 0.0099148 | 2.06E+00 | 1.62E+00 |
| Colorectum            | Tobacco                      | 0.119 | 0.009 | 2.97E-37 | 8.49E-35  | 1.58E+00 | 1.52E+00 |
| Breast                | Tobacco                      | 0.088 | 0.007 | 3.68E-35 | 1.04E-32  | 1.57E+00 | 1.50E+00 |
| Prostate              | Tobacco:LM.Cannabis:Herb.THC | 0.281 | 0.097 | 3.90E-03 | 0.5114543 | 2.06E+00 | 1.45E+00 |
| Stomach               | Tobacco                      | 0.081 | 0.007 | 5.69E-27 | 1.55E-24  | 1.51E+00 | 1.45E+00 |
| Colorectum            | Alcohol                      | 0.120 | 0.020 | 5.07E-09 | 1.06E-06  | 1.58E+00 | 1.44E+00 |
| All Cancers nNMSC     | Tobacco:LM.Cannabis          | 0.017 | 0.002 | 6.89E-24 | 1.86E-21  | 1.47E+00 | 1.40E+00 |
| Testis                | Tobacco:LM.Cannabis:Herb.THC | 0.264 | 0.101 | 9.25E-03 | 1         | 2.00E+00 | 1.36E+00 |
| Pancreas              | Tobacco:LM.Cannabis:Herb.THC | 0.112 | 0.043 | 9.81E-03 | 1         | 1.97E+00 | 1.34E+00 |
| Corpus Uteri          | Tobacco                      | 0.073 | 0.010 | 4.44E-14 | 1.09E-11  | 1.40E+00 | 1.33E+00 |
| Oesophagus            | Alcohol                      | 0.055 | 0.012 | 1.12E-05 | 0.0020028 | 1.48E+00 | 1.32E+00 |
| Testis                | Tobacco                      | 0.075 | 0.012 | 3.13E-09 | 6.64E-07  | 1.39E+00 | 1.30E+00 |
| Prostate              | Tobacco                      | 0.069 | 0.010 | 8.15E-12 | 1.87E-09  | 1.37E+00 | 1.30E+00 |
| Stomach               | Alcohol                      | 0.067 | 0.017 | 7.62E-05 | 0.0128029 | 1.44E+00 | 1.28E+00 |
| Ovary                 | Tobacco                      | 0.052 | 0.008 | 1.06E-10 | 2.36E-08  | 1.36E+00 | 1.28E+00 |
| Liver                 | Tobacco:LM.Cannabis          | 0.016 | 0.002 | 2.54E-11 | 5.74E-09  | 1.25E+00 | 1.20E+00 |
| Breast                | Alcohol                      | 0.048 | 0.016 | 2.14E-03 | 0.2999347 | 1.37E+00 | 1.20E+00 |

|                       |                              |       |       |          |           |          |          |
|-----------------------|------------------------------|-------|-------|----------|-----------|----------|----------|
| Melanoma              | Tobacco:LM.Cannabis          | 0.019 | 0.003 | 4.89E-11 | 1.10E-08  | 1.24E+00 | 1.19E+00 |
| Lung                  | Tobacco:LM.Cannabis          | 0.011 | 0.002 | 4.76E-11 | 1.07E-08  | 1.24E+00 | 1.19E+00 |
| Bladder               | LM.Cannabis                  | 0.145 | 0.069 | 3.63E-02 | 1         | 2.24E+00 | 1.18E+00 |
| Pancreas              | Tobacco:LM.Cannabis          | 0.014 | 0.002 | 9.55E-10 | 2.07E-07  | 1.23E+00 | 1.18E+00 |
| Larynx                | Tobacco                      | 0.019 | 0.005 | 2.06E-04 | 0.0331831 | 1.25E+00 | 1.16E+00 |
| Cervix                | Alcohol                      | 0.060 | 0.022 | 6.45E-03 | 0.8197789 | 1.35E+00 | 1.16E+00 |
| Kidney                | Tobacco:LM.Cannabis          | 0.012 | 0.002 | 5.20E-07 | 1.02E-04  | 1.20E+00 | 1.15E+00 |
| Prostate              | Alcohol                      | 0.058 | 0.023 | 9.90E-03 | 1         | 1.33E+00 | 1.14E+00 |
| Oesophagus            | Tobacco:LM.Cannabis          | 0.013 | 0.003 | 7.85E-06 | 0.0014205 | 1.19E+00 | 1.13E+00 |
| Non-Hodgkins lymphoma | Resin.THC                    | 0.374 | 0.188 | 4.71E-02 | 1         | 3.50E+00 | 1.12E+00 |
| Bladder               | Tobacco                      | 0.012 | 0.004 | 6.51E-03 | 0.8204035 | 1.21E+00 | 1.10E+00 |
| Non-Hodgkins lymphoma | Tobacco:LM.Cannabis          | 0.010 | 0.003 | 7.32E-04 | 0.1091011 | 1.16E+00 | 1.10E+00 |
| Thyroid               | Alcohol                      | 0.027 | 0.013 | 3.21E-02 | 1         | 1.34E+00 | 1.08E+00 |
| Brain                 | Tobacco                      | 0.011 | 0.005 | 2.49E-02 | 1         | 1.19E+00 | 1.06E+00 |
| Anus                  | Tobacco:LM.Cannabis          | 0.004 | 0.002 | 2.71E-02 | 1         | 1.13E+00 | 1.04E+00 |
| Brain                 | Tobacco:LM.Cannabis          | 0.000 | 0.002 | 9.17E-01 | 1         | 1.02E+00 | 1.00E+00 |
| Cervix                | Tobacco:LM.Cannabis          | 0.003 | 0.005 | 5.88E-01 | 1         | 1.06E+00 | 1.00E+00 |
| Corpus Uteri          | Alcohol                      | 0.007 | 0.022 | 7.58E-01 | 1         | 1.10E+00 | 1.00E+00 |
| Cervix                | Tobacco                      | 0.011 | 0.010 | 2.79E-01 | 1         | 1.12E+00 | 1.00E+00 |
| Testis                | Alcohol                      | 0.024 | 0.029 | 4.01E-01 | 1         | 1.19E+00 | 1.00E+00 |
| Hodgkins              | Alcohol                      | 0.010 | 0.009 | 2.95E-01 | 1         | 1.22E+00 | 1.00E+00 |
| Melanoma              | Income                       | 0.024 | 0.038 | 5.27E-01 | 1         | 1.28E+00 | 1.00E+00 |
| Ovary                 | Tobacco:LM.Cannabis:Herb.THC | 0.064 | 0.077 | 4.07E-01 | 1         | 1.41E+00 | 1.00E+00 |
| Ovary                 | Tobacco:Herb.THC             | 0.081 | 0.181 | 6.52E-01 | 1         | 1.49E+00 | 1.00E+00 |
| Brain                 | Tobacco:LM.Cannabis:Herb.THC | 0.055 | 0.047 | 2.40E-01 | 1         | 1.52E+00 | 1.00E+00 |
| Cervix                | Tobacco:Herb.THC             | 0.113 | 0.222 | 6.09E-01 | 1         | 1.53E+00 | 1.00E+00 |
| Pancreas              | Tobacco:Herb.THC             | 0.054 | 0.102 | 5.99E-01 | 1         | 1.54E+00 | 1.00E+00 |
| Oropharynx_Broad      | Income                       | 0.058 | 0.057 | 3.07E-01 | 1         | 1.57E+00 | 1.00E+00 |
| Non-Hodgkins lymphoma | Tobacco:LM.Cannabis:Herb.THC | 0.081 | 0.058 | 1.64E-01 | 1         | 1.61E+00 | 1.00E+00 |
| Oropharynx_Broad      | Tobacco                      | 0.064 | 0.033 | 5.49E-02 | 1         | 1.61E+00 | 1.00E+00 |



|                      |                              |          |          |          |   |          |          |
|----------------------|------------------------------|----------|----------|----------|---|----------|----------|
| Bladder              | Tobacco:LM.Cannabis:Herb.THC | 0.062    | 0.042    | 1.46E-01 | 1 | 1.61E+00 | 1.00E+00 |
| Lung                 | Tobacco:LM.Cannabis:Herb.THC | 0.046    | 0.031    | 1.33E-01 | 1 | 1.63E+00 | 1.00E+00 |
| Larynx               | Tobacco:LM.Cannabis:Herb.THC | 0.086    | 0.050    | 8.89E-02 | 1 | 1.69E+00 | 1.00E+00 |
| Corpus Uteri         | Tobacco:LM.Cannabis:Herb.THC | 0.182    | 0.093    | 5.16E-02 | 1 | 1.77E+00 | 1.00E+00 |
| Melanoma             | Tobacco:LM.Cannabis:Herb.THC | 0.104    | 0.054    | 5.43E-02 | 1 | 1.77E+00 | 1.00E+00 |
| Myeloma              | Income                       | 0.054    | 0.030    | 7.06E-02 | 1 | 1.78E+00 | 1.00E+00 |
| Brain                | Tobacco:Herb.THC             | 0.132    | 0.110    | 2.33E-01 | 1 | 2.04E+00 | 1.00E+00 |
| Lung                 | Tobacco:Herb.THC             | 0.089    | 0.072    | 2.17E-01 | 1 | 2.07E+00 | 1.00E+00 |
| Ovary                | LM.Cannabis                  | 0.229    | 0.126    | 6.91E-02 | 1 | 2.09E+00 | 1.00E+00 |
| Leukaemia - Myeloid  | Tobacco:LM.Cannabis:Herb.THC | 0.076    | 0.233    | 7.46E-01 | 1 | 2.14E+00 | 1.00E+00 |
| Kaposi               | Income                       | 0.132    | 0.765    | 8.64E-01 | 1 | 3.41E+00 | 1.00E+00 |
| Cervix               | Herb.THC                     | 0.972    | 6.916    | 8.88E-01 | 1 | 5.46E+00 | 1.00E+00 |
| Leukaemia - Lymphoid | Tobacco:LM.Cannabis:Herb.THC | 0.144    | 0.116    | 2.17E-01 | 1 | 6.67E+00 | 1.00E+00 |
| Leukaemia - Myeloid  | LM.Cannabis                  | 0.348    | 0.885    | 6.95E-01 | 1 | 8.85E+00 | 1.00E+00 |
| Oropharynx_Broad     | Tobacco:LM.Cannabis:Herb.THC | 0.671    | 0.520    | 1.97E-01 | 1 | 9.78E+00 | 1.00E+00 |
| Cervix               | LM.Cannabis:Herb.THC         | 1.628    | 2.958    | 5.82E-01 | 1 | 1.21E+01 | 1.00E+00 |
| All Cancers nNMSC    | LM.Cannabis:Herb.THC         | 0.723    | 0.785    | 3.57E-01 | 1 | 2.10E+02 | 1.00E+00 |
| Oropharynx_Broad     | LM.Cannabis                  | 2.141    | 1.888    | 2.57E-01 | 1 | 3.73E+02 | 1.00E+00 |
| Ovary                | Herb.THC                     | 3.972    | 5.634    | 4.81E-01 | 1 | 4.99E+02 | 1.00E+00 |
| Leukaemia - Lymphoid | LM.Cannabis                  | 0.681    | 0.442    | 1.25E-01 | 1 | 8.56E+02 | 1.00E+00 |
| Lung                 | Herb.THC                     | 2.054    | 2.246    | 3.61E-01 | 1 | 2.57E+03 | 1.00E+00 |
| Larynx               | Herb.THC                     | 6.218    | 3.692    | 9.25E-02 | 1 | 1.06E+06 | 1.00E+00 |
| Pancreas             | Herb.THC                     | 6.037    | 3.177    | 5.77E-02 | 1 | 5.77E+06 | 1.00E+00 |
| Kaposi               | Tobacco:LM.Cannabis          | 5.973    | 23.657   | 8.02E-01 | 1 | 8.03E+13 | 1.00E+00 |
| Leukaemia - Lymphoid | Herb.THC                     | 4.180    | 3.411    | 2.23E-01 | 1 | 2.78E+16 | 1.00E+00 |
| Leukaemia - Myeloid  | Herb.THC                     | 9.537    | 6.836    | 1.65E-01 | 1 | 4.82E+18 | 1.00E+00 |
| Kaposi               | Herb.THC                     | 3112.129 | 9432.047 | 7.43E-01 | 1 | Inf      | 1.00E+00 |
| Thyroid              | Tobacco                      | -0.001   | 0.005    | 8.94E-01 | 1 | 1.04E+00 | -        |
| Bladder              | Tobacco:LM.Cannabis          | -0.003   | 0.002    | 1.51E-01 | 1 | 1.10E+00 | -        |
| Myeloma              | Tobacco:LM.Cannabis          | -0.002   | 0.002    | 1.14E-01 | 1 | 1.11E+00 | -        |

|                       |                              |        |       |          |           |          |   |
|-----------------------|------------------------------|--------|-------|----------|-----------|----------|---|
| Ovary                 | Tobacco:LM.Cannabis          | -0.008 | 0.004 | 4.53E-02 | 1         | 1.12E+00 | - |
| Hodgkins              | Tobacco                      | -0.004 | 0.004 | 2.63E-01 | 1         | 1.14E+00 | - |
| All Cancers           | Tobacco:LM.Cannabis          | -0.004 | 0.008 | 6.41E-01 | 1         | 1.15E+00 | - |
| Anus                  | Tobacco                      | -0.005 | 0.004 | 2.23E-01 | 1         | 1.15E+00 | - |
| Prostate              | Tobacco:LM.Cannabis          | -0.017 | 0.005 | 7.87E-04 | 0.1164532 | 1.16E+00 | - |
| Testis                | Tobacco:LM.Cannabis          | -0.018 | 0.005 | 7.97E-04 | 0.1171623 | 1.16E+00 | - |
| Corpus Uteri          | Tobacco:LM.Cannabis          | -0.021 | 0.005 | 2.72E-05 | 0.0047296 | 1.18E+00 | - |
| Corpus Uteri          | Income                       | -0.023 | 0.067 | 7.25E-01 | 1         | 1.19E+00 | - |
| Kidney                | Tobacco                      | -0.012 | 0.004 | 6.67E-03 | 0.8333041 | 1.21E+00 | - |
| Hodgkins              | Tobacco:LM.Cannabis          | -0.009 | 0.002 | 8.55E-08 | 1.72E-05  | 1.22E+00 | - |
| All Cancers           | Tobacco                      | -0.007 | 0.003 | 3.83E-02 | 1         | 1.22E+00 | - |
| Gallbladder & Biliary | Tobacco:LM.Cannabis          | -0.012 | 0.002 | 1.76E-09 | 3.77E-07  | 1.24E+00 | - |
| Oesophagus            | Tobacco                      | -0.019 | 0.005 | 4.87E-04 | 0.0745743 | 1.24E+00 | - |
| Cervix                | Tobacco:LM.Cannabis:Herb.THC | -0.034 | 0.095 | 7.16E-01 | 1         | 1.24E+00 | - |
| Larynx                | Tobacco:LM.Cannabis          | -0.019 | 0.003 | 5.24E-13 | 1.24E-10  | 1.25E+00 | - |
| Breast                | Tobacco:LM.Cannabis          | -0.026 | 0.004 | 4.10E-13 | 9.85E-11  | 1.25E+00 | - |
| Colorectum            | Income                       | -0.034 | 0.062 | 5.81E-01 | 1         | 1.25E+00 | - |
| Lung                  | Tobacco                      | -0.012 | 0.003 | 1.06E-04 | 0.0174307 | 1.26E+00 | - |
| Pancreas              | Tobacco                      | -0.018 | 0.004 | 7.91E-05 | 0.0132035 | 1.26E+00 | - |
| Ovary                 | Alcohol                      | -0.032 | 0.018 | 7.28E-02 | 1         | 1.27E+00 | - |
| Myeloma               | Alcohol                      | -0.012 | 0.008 | 1.52E-01 | 1         | 1.27E+00 | - |
| Ovary                 | Income                       | -0.034 | 0.055 | 5.36E-01 | 1         | 1.27E+00 | - |
| Melanoma              | Tobacco                      | -0.024 | 0.005 | 1.45E-05 | 0.0025677 | 1.28E+00 | - |
| Thyroid               | Tobacco:LM.Cannabis          | -0.020 | 0.002 | 2.44E-16 | 6.19E-14  | 1.28E+00 | - |
| Kidney                | Tobacco:Herb.THC             | -0.021 | 0.102 | 8.41E-01 | 1         | 1.29E+00 | - |
| Myeloma               | Tobacco                      | -0.015 | 0.003 | 2.68E-05 | 0.0046903 | 1.31E+00 | - |
| Stomach               | Tobacco:LM.Cannabis          | -0.043 | 0.004 | 1.27E-28 | 3.49E-26  | 1.33E+00 | - |
| Colorectum            | Tobacco:LM.Cannabis          | -0.054 | 0.005 | 2.99E-30 | 8.30E-28  | 1.34E+00 | - |
| All Cancers nNMSC     | Tobacco:LM.Cannabis:Herb.THC | -0.011 | 0.025 | 6.63E-01 | 1         | 1.35E+00 | - |
| Leukaemia - Myeloid   | Tobacco:LM.Cannabis          | -0.017 | 0.026 | 5.04E-01 | 1         | 1.37E+00 | - |

|                       |                     |        |       |          |           |          |   |
|-----------------------|---------------------|--------|-------|----------|-----------|----------|---|
| Hodgkins              | Income              | -0.025 | 0.034 | 4.53E-01 | 1         | 1.41E+00 | - |
| Leukaemia - Myeloid   | Tobacco             | -0.021 | 0.025 | 4.02E-01 | 1         | 1.43E+00 | - |
| Non-Hodgkins lymphoma | Tobacco             | -0.051 | 0.006 | 4.97E-18 | 1.28E-15  | 1.44E+00 | - |
| All Cancers           | LM.Cannabis         | -0.024 | 0.260 | 9.27E-01 | 1         | 1.47E+00 | - |
| Liver                 | Tobacco             | -0.045 | 0.006 | 6.10E-15 | 1.52E-12  | 1.48E+00 | - |
| Brain                 | Alcohol             | -0.053 | 0.011 | 1.85E-06 | 3.46E-04  | 1.51E+00 | - |
| Brain                 | LM.Cannabis         | -0.054 | 0.077 | 4.82E-01 | 1         | 1.52E+00 | - |
| Oropharynx_Broad      | Alcohol             | -0.051 | 0.071 | 4.76E-01 | 1         | 1.52E+00 | - |
| Non-Hodgkins lymphoma | Alcohol             | -0.076 | 0.013 | 9.75E-09 | 2.03E-06  | 1.58E+00 | - |
| Thyroid               | Income              | -0.059 | 0.046 | 2.02E-01 | 1         | 1.59E+00 | - |
| Gallbladder & Biliary | Income              | -0.049 | 0.038 | 1.95E-01 | 1         | 1.62E+00 | - |
| Oropharynx_Broad      | Tobacco:LM.Cannabis | -0.065 | 0.058 | 2.67E-01 | 1         | 1.62E+00 | - |
| Lung                  | Alcohol             | -0.046 | 0.007 | 1.07E-10 | 2.38E-08  | 1.63E+00 | - |
| Anus                  | Alcohol             | -0.052 | 0.010 | 1.58E-07 | 3.15E-05  | 1.65E+00 | - |
| Oropharynx            | Alcohol             | -0.034 | 0.057 | 5.58E-01 | 1         | 1.65E+00 | - |
| Leukaemia - Lymphoid  | Tobacco:LM.Cannabis | -0.022 | 0.013 | 9.04E-02 | 1         | 1.73E+00 | - |
| Leukaemia - Lymphoid  | Tobacco             | -0.022 | 0.012 | 7.77E-02 | 1         | 1.73E+00 | - |
| Melanoma              | Alcohol             | -0.103 | 0.012 | 3.32E-16 | 8.41E-14  | 1.76E+00 | - |
| Cervix                | LM.Cannabis         | -0.190 | 0.155 | 2.20E-01 | 1         | 1.78E+00 | - |
| Bladder               | Tobacco:Herb.THC    | -0.091 | 0.099 | 3.61E-01 | 1         | 1.83E+00 | - |
| Kidney                | Alcohol             | -0.103 | 0.010 | 6.26E-23 | 1.67E-20  | 1.89E+00 | - |
| Larynx                | Tobacco:Herb.THC    | -0.120 | 0.118 | 3.10E-01 | 1         | 1.90E+00 | - |
| Cervix                | Income              | -0.240 | 0.067 | 3.76E-04 | 0.0582714 | 1.95E+00 | - |
| All Cancers nNMSC     | Tobacco             | -0.043 | 0.004 | 1.17E-23 | 3.15E-21  | 1.97E+00 | - |
| Bladder               | Alcohol             | -0.115 | 0.010 | 6.49E-30 | 1.80E-27  | 2.01E+00 | - |
| Pancreas              | Alcohol             | -0.125 | 0.010 | 4.90E-33 | 1.38E-30  | 2.06E+00 | - |
| Larynx                | Income              | -0.175 | 0.036 | 1.14E-06 | 2.17E-04  | 2.26E+00 | - |
| Oesophagus            | Income              | -0.186 | 0.038 | 1.10E-06 | 2.12E-04  | 2.26E+00 | - |
| Liver                 | Tobacco:Herb.THC    | -0.161 | 0.121 | 1.82E-01 | 1         | 2.33E+00 | - |
| Liver                 | Alcohol             | -0.162 | 0.013 | 6.78E-33 | 1.90E-30  | 2.33E+00 | - |

|                       |                      |        |       |          |           |          |   |
|-----------------------|----------------------|--------|-------|----------|-----------|----------|---|
| Melanoma              | Resin.THC            | -0.205 | 0.176 | 2.44E-01 | 1         | 2.38E+00 | - |
| Breast                | Resin.THC            | -0.259 | 0.218 | 2.36E-01 | 1         | 2.39E+00 | - |
| Anus                  | Income               | -0.132 | 0.036 | 2.77E-04 | 0.0434285 | 2.44E+00 | - |
| Corpus Uteri          | Tobacco:Herb.THC     | -0.392 | 0.219 | 7.40E-02 | 1         | 2.51E+00 | - |
| Prostate              | Tobacco:Herb.THC     | -0.431 | 0.228 | 5.89E-02 | 1         | 2.59E+00 | - |
| Leukaemia - Myeloid   | Income               | -0.111 | 0.232 | 6.33E-01 | 1         | 2.66E+00 | - |
| Myeloma               | Tobacco:Herb.THC     | -0.128 | 0.074 | 8.32E-02 | 1         | 2.68E+00 | - |
| Gallbladder & Biliary | Alcohol              | -0.163 | 0.012 | 2.60E-39 | 7.47E-37  | 2.75E+00 | - |
| Bladder               | Income               | -0.206 | 0.030 | 1.19E-11 | 2.71E-09  | 2.76E+00 | - |
| Anus                  | LM.Cannabis          | -0.162 | 0.058 | 5.28E-03 | 0.6757845 | 2.76E+00 | - |
| Liver                 | Income               | -0.219 | 0.048 | 5.72E-06 | 0.0010408 | 2.81E+00 | - |
| Non-Hodgkins lymphoma | Income               | -0.307 | 0.040 | 5.31E-14 | 1.30E-11  | 3.00E+00 | - |
| Hodgkins              | Tobacco:Herb.THC     | -0.174 | 0.083 | 3.78E-02 | 1         | 3.04E+00 | - |
| All Cancers nNMSC     | Alcohol              | -0.094 | 0.005 | 3.77E-60 | 1.11E-57  | 3.07E+00 | - |
| Non-Hodgkins lymphoma | LM.Cannabis          | -0.324 | 0.093 | 5.14E-04 | 0.077616  | 3.12E+00 | - |
| Melanoma              | Tobacco:Herb.THC     | -0.336 | 0.125 | 7.41E-03 | 0.9188925 | 3.34E+00 | - |
| Stomach               | Income               | -0.491 | 0.051 | 3.43E-21 | 9.08E-19  | 3.58E+00 | - |
| Stomach               | Tobacco:Herb.THC     | -0.511 | 0.168 | 2.42E-03 | 0.3337366 | 3.71E+00 | - |
| Oesophagus            | LM.Cannabis          | -0.410 | 0.087 | 2.83E-06 | 5.20E-04  | 3.98E+00 | - |
| All Cancers           | Income               | -0.203 | 0.027 | 1.05E-13 | 2.53E-11  | 4.40E+00 | - |
| Kidney                | LM.Cannabis          | -0.441 | 0.071 | 8.00E-10 | 1.75E-07  | 5.36E+00 | - |
| Pancreas              | Income               | -0.454 | 0.031 | 4.04E-45 | 1.17E-42  | 5.57E+00 | - |
| Liver                 | LM.Cannabis          | -0.464 | 0.077 | 2.58E-09 | 5.49E-07  | 5.66E+00 | - |
| Oesophagus            | Tobacco:Herb.THC     | -0.571 | 0.125 | 5.55E-06 | 0.001016  | 5.74E+00 | - |
| Leukaemia - Myeloid   | LM.Cannabis:Herb.THC | -0.265 | 7.868 | 9.73E-01 | 1         | 5.94E+00 | - |
| Lung                  | LM.Cannabis          | -0.351 | 0.050 | 4.33E-12 | 1.01E-09  | 6.25E+00 | - |
| Pancreas              | LM.Cannabis          | -0.498 | 0.071 | 3.82E-12 | 8.94E-10  | 6.28E+00 | - |
| Lung                  | Income               | -0.356 | 0.022 | 3.05E-54 | 8.91E-52  | 6.37E+00 | - |
| Kidney                | Income               | -0.507 | 0.031 | 1.54E-54 | 4.53E-52  | 6.40E+00 | - |
| Testis                | Tobacco:Herb.THC     | -1.253 | 0.262 | 2.04E-06 | 3.80E-04  | 7.36E+00 | - |

|                       |                              |        |       |          |           |          |   |
|-----------------------|------------------------------|--------|-------|----------|-----------|----------|---|
| All Cancers           | Tobacco:Herb.THC             | -0.320 | 0.078 | 4.39E-05 | 0.0075147 | 7.85E+00 | - |
| Melanoma              | LM.Cannabis                  | -0.725 | 0.088 | 3.33E-16 | 8.41E-14  | 8.04E+00 | - |
| Testis                | Resin.THC                    | -1.334 | 0.357 | 2.01E-04 | 0.0327814 | 8.10E+00 | - |
| Leukaemia - Myeloid   | Tobacco:Herb.THC             | -0.379 | 0.187 | 4.48E-02 | 1         | 1.02E+01 | - |
| Leukaemia - Myeloid   | Resin.THC                    | -0.390 | 0.963 | 6.86E-01 | 1         | 1.08E+01 | - |
| Stomach               | Resin.THC                    | -1.164 | 0.235 | 7.95E-07 | 1.54E-04  | 1.08E+01 | - |
| Anus                  | Tobacco:Herb.THC             | -0.553 | 0.089 | 7.57E-10 | 1.67E-07  | 1.14E+01 | - |
| Leukaemia - Lymphoid  | Tobacco:Herb.THC             | -0.203 | 0.093 | 3.14E-02 | 1         | 1.17E+01 | - |
| Oropharynx_Broad      | Tobacco:Herb.THC             | -0.811 | 0.261 | 2.05E-03 | 0.2897444 | 1.40E+01 | - |
| Leukaemia - Lymphoid  | Income                       | -0.238 | 0.116 | 4.14E-02 | 1         | 1.62E+01 | - |
| Thyroid               | Tobacco:Herb.THC             | -0.844 | 0.114 | 3.00E-13 | 7.22E-11  | 1.63E+01 | - |
| Corpus Uteri          | Resin.THC                    | -1.864 | 0.304 | 1.13E-09 | 2.43E-07  | 1.63E+01 | - |
| Breast                | Tobacco:Herb.THC             | -1.405 | 0.157 | 1.36E-18 | 3.55E-16  | 1.85E+01 | - |
| All Cancers nNMSC     | Income                       | -0.367 | 0.017 | 1.37E-86 | 4.07E-84  | 2.07E+01 | - |
| Colorectum            | Tobacco:Herb.THC             | -2.145 | 0.206 | 2.33E-24 | 6.33E-22  | 2.67E+01 | - |
| Prostate              | Resin.THC                    | -2.458 | 0.315 | 1.43E-14 | 3.54E-12  | 2.94E+01 | - |
| Brain                 | Resin.THC                    | -1.302 | 0.154 | 7.79E-17 | 1.99E-14  | 3.80E+01 | - |
| Ovary                 | Resin.THC                    | -2.215 | 0.252 | 4.58E-18 | 1.18E-15  | 4.30E+01 | - |
| Gallbladder & Biliary | Tobacco:Herb.THC             | -0.995 | 0.100 | 5.55E-22 | 1.48E-19  | 4.72E+01 | - |
| Ovary                 | LM.Cannabis:Herb.THC         | -2.359 | 2.409 | 3.28E-01 | 1         | 5.26E+01 | - |
| Cervix                | Resin.THC                    | -2.911 | 0.309 | 2.21E-20 | 5.82E-18  | 5.35E+01 | - |
| Brain                 | LM.Cannabis:Herb.THC         | -1.479 | 1.473 | 3.16E-01 | 1         | 5.72E+01 | - |
| All Cancers nNMSC     | LM.Cannabis                  | -0.556 | 0.053 | 7.68E-25 | 2.09E-22  | 7.09E+01 | - |
| Melanoma              | LM.Cannabis:Herb.THC         | -1.865 | 1.681 | 2.68E-01 | 1         | 8.39E+01 | - |
| Oropharynx_Broad      | Resin.THC                    | -1.594 | 1.046 | 1.28E-01 | 1         | 9.76E+01 | - |
| Oropharynx            | Tobacco:LM.Cannabis:Herb.THC | -0.792 | 0.256 | 2.52E-03 | 0.3429089 | 1.00E+02 | - |
| Lung                  | LM.Cannabis:Herb.THC         | -1.200 | 0.959 | 2.11E-01 | 1         | 1.30E+02 | - |
| Non-Hodgkins lymphoma | LM.Cannabis:Herb.THC         | -2.287 | 1.801 | 2.04E-01 | 1         | 1.58E+02 | - |
| Kidney                | Resin.THC                    | -1.820 | 0.142 | 3.75E-35 | 1.06E-32  | 1.74E+02 | - |
| All Cancers nNMSC     | Resin.THC                    | -0.707 | 0.087 | 1.68E-15 | 4.20E-13  | 1.88E+02 | - |

|                       |                      |         |        |           |           |          |   |
|-----------------------|----------------------|---------|--------|-----------|-----------|----------|---|
| All Cancers           | Resin.THC            | -1.041  | 0.110  | 8.80E-20  | 2.31E-17  | 2.12E+02 | - |
| Anus                  | Resin.THC            | -1.447  | 0.121  | 1.52E-30  | 4.23E-28  | 2.15E+02 | - |
| Pancreas              | Resin.THC            | -2.022  | 0.142  | 1.10E-42  | 3.17E-40  | 2.92E+02 | - |
| Leukaemia - Lymphoid  | Resin.THC            | -0.650  | 0.480  | 1.79E-01  | 1         | 6.45E+02 | - |
| Thyroid               | Resin.THC            | -2.501  | 0.155  | 3.14E-51  | 9.14E-49  | 1.10E+03 | - |
| Brain                 | Herb.THC             | -3.023  | 3.445  | 3.80E-01  | 1         | 1.92E+03 | - |
| Corpus Uteri          | LM.Cannabis:Herb.THC | -6.351  | 2.921  | 2.99E-02  | 1         | 2.85E+03 | - |
| Pancreas              | LM.Cannabis:Herb.THC | -3.114  | 1.359  | 2.21E-02  | 1         | 4.30E+03 | - |
| Larynx                | LM.Cannabis:Herb.THC | -3.793  | 1.579  | 1.65E-02  | 1         | 6.22E+03 | - |
| Testis                | LM.Cannabis:Herb.THC | -7.897  | 3.197  | 1.37E-02  | 1         | 1.15E+04 | - |
| Bladder               | LM.Cannabis:Herb.THC | -3.528  | 1.323  | 7.77E-03  | 0.9560667 | 1.51E+04 | - |
| Gallbladder & Biliary | Resin.THC            | -2.889  | 0.169  | 3.31E-56  | 9.73E-54  | 2.00E+04 | - |
| Liver                 | LM.Cannabis:Herb.THC | -3.856  | 1.460  | 8.40E-03  | 1         | 2.46E+04 | - |
| Prostate              | LM.Cannabis:Herb.THC | -8.929  | 3.035  | 3.32E-03  | 0.4381633 | 3.71E+04 | - |
| Oropharynx            | LM.Cannabis          | -2.078  | 0.944  | 2.99E-02  | 1         | 5.88E+04 | - |
| Kidney                | LM.Cannabis:Herb.THC | -4.294  | 1.364  | 1.68E-03  | 0.2415374 | 7.60E+04 | - |
| Liver                 | Resin.THC            | -4.608  | 0.165  | 2.33E-122 | 6.93E-120 | 1.55E+05 | - |
| Oesophagus            | LM.Cannabis:Herb.THC | -5.896  | 1.669  | 4.27E-04  | 0.0658085 | 2.74E+05 | - |
| Hodgkins              | LM.Cannabis:Herb.THC | -3.753  | 1.018  | 2.41E-04  | 0.0383064 | 8.19E+05 | - |
| Non-Hodgkins lymphoma | Herb.THC             | -6.856  | 4.122  | 9.65E-02  | 1         | 9.85E+05 | - |
| Myeloma               | LM.Cannabis:Herb.THC | -3.506  | 0.897  | 1.00E-04  | 0.0166784 | 1.77E+06 | - |
| Breast                | LM.Cannabis:Herb.THC | -11.728 | 2.099  | 2.87E-08  | 5.86E-06  | 2.86E+08 | - |
| Anus                  | LM.Cannabis:Herb.THC | -5.910  | 1.084  | 6.50E-08  | 1.31E-05  | 3.98E+08 | - |
| Stomach               | LM.Cannabis:Herb.THC | -12.980 | 2.245  | 9.39E-09  | 1.96E-06  | 5.12E+08 | - |
| Thyroid               | LM.Cannabis:Herb.THC | -8.030  | 1.389  | 1.04E-08  | 2.16E-06  | 1.25E+09 | - |
| Gallbladder & Biliary | LM.Cannabis:Herb.THC | -7.950  | 1.156  | 1.23E-11  | 2.78E-09  | 2.03E+11 | - |
| All Cancers           | LM.Cannabis:Herb.THC | -5.790  | 2.342  | 1.38E-02  | 1         | 3.67E+11 | - |
| Colorectum            | LM.Cannabis:Herb.THC | -24.428 | 2.743  | 1.91E-18  | 4.95E-16  | 1.65E+13 | - |
| Leukaemia - Lymphoid  | LM.Cannabis:Herb.THC | -4.021  | 3.926  | 3.08E-01  | 1         | 6.78E+15 | - |
| Oropharynx_Broad      | LM.Cannabis:Herb.THC | -21.443 | 16.589 | 1.97E-01  | 1         | 1.11E+23 | - |

|                   |                              |          |          |          |          |           |   |
|-------------------|------------------------------|----------|----------|----------|----------|-----------|---|
| Kaposi            | Tobacco:LM.Cannabis:Herb.THC | -13.532  | 52.173   | 7.96E-01 | 1        | 1.32E+31  | - |
| Kaposi            | Tobacco                      | -14.942  | 45.896   | 7.46E-01 | 1        | 2.14E+34  | - |
| All Cancers nNMSC | Herb.THC                     | -12.551  | 2.267    | 3.88E-08 | 7.88E-06 | 2.37E+35  | - |
| Oropharynx        | Herb.THC                     | -39.139  | 7.250    | 4.33E-07 | 8.58E-05 | 3.03E+84  | - |
| Kaposi            | LM.Cannabis                  | -44.889  | 201.931  | 8.25E-01 | 1        | 3.40E+102 | - |
| Kaposi            | LM.Cannabis:Herb.THC         | -587.141 | 2205.823 | 7.91E-01 | 1        | Inf       | - |

Supplementary Table S29.: Significant Positive Terms from  
Interactive Panel Regression at Two Temporal Lags

| Cancer                | Term                 | Estimate | Std.Error | P_Value  | P.Adj.Holm | eValPt   | eValLo   |
|-----------------------|----------------------|----------|-----------|----------|------------|----------|----------|
| Colorectum            | Herb.THC             | 71.633   | 6.427     | 1.57E-27 | 4.30E-25   | 1.51E+38 | 3.40E+31 |
| Breast                | Herb.THC             | 46.987   | 4.896     | 4.60E-21 | 1.21E-18   | 9.34E+32 | 2.05E+26 |
| Gallbladder & Biliary | Herb.THC             | 23.007   | 2.984     | 3.78E-14 | 9.34E-12   | 1.44E+32 | 1.19E+24 |
| Anus                  | Herb.THC             | 20.215   | 2.753     | 4.83E-13 | 1.16E-10   | 4.88E+28 | 1.34E+21 |
| Thyroid               | Herb.THC             | 24.546   | 3.529     | 6.92E-12 | 1.59E-09   | 1.56E+27 | 4.27E+19 |
| All Cancers           | Herb.THC             | 13.291   | 2.291     | 1.17E-08 | 2.42E-06   | 1.44E+26 | 2.75E+17 |
| Oropharynx            | Resin.THC            | 9.983    | 1.206     | 4.86E-13 | 1.16E-10   | 5.94E+21 | 4.99E+16 |
| Oropharynx_Broad      | Herb.THC             | 27.243   | 6.396     | 2.56E-05 | 4.50E-03   | 1.58E+29 | 8.46E+15 |
| Testis                | Herb.THC             | 39.967   | 8.119     | 1.02E-06 | 1.98E-04   | 2.14E+19 | 5.87E+11 |
| Oesophagus            | Herb.THC             | 20.767   | 3.903     | 1.23E-07 | 2.46E-05   | 2.47E+18 | 5.52E+11 |
| Stomach               | Herb.THC             | 25.533   | 5.249     | 1.30E-06 | 2.45E-04   | 6.92E+16 | 1.55E+10 |
| Myeloma               | Herb.THC             | 7.103    | 2.279     | 1.89E-03 | 2.68E-01   | 2.25E+12 | 6.17E+04 |
| Melanoma              | Herb.THC             | 12.545   | 3.908     | 1.36E-03 | 1.97E-01   | 1.72E+11 | 3.74E+04 |
| Prostate              | Herb.THC             | 21.614   | 7.110     | 2.42E-03 | 3.34E-01   | 4.28E+10 | 9.64E+03 |
| Corpus Uteri          | Herb.THC             | 19.252   | 6.845     | 4.99E-03 | 6.49E-01   | 7.24E+09 | 1.63E+03 |
| Oropharynx            | LM.Cannabis:Herb.THC | 18.029   | 8.556     | 3.75E-02 | 1.00E+00   | 1.20E+39 | 1.21E+03 |
| Liver                 | Herb.THC             | 9.628    | 3.773     | 1.09E-02 | 1.00E+00   | 3.27E+10 | 4.84E+02 |
| Oropharynx            | Income               | 1.334    | 0.259     | 1.21E-06 | 2.30E-04   | 1.48E+03 | 1.20E+02 |
| Oropharynx            | Tobacco:Herb.THC     | 1.171    | 0.183     | 4.80E-09 | 1.01E-06   | 6.59E+02 | 1.11E+02 |
| Kidney                | Herb.THC             | 7.611    | 3.189     | 1.71E-02 | 1.00E+00   | 2.61E+08 | 5.79E+01 |
| Oesophagus            | Resin.THC            | 2.014    | 0.174     | 2.48E-29 | 6.84E-27   | 1.13E+02 | 5.68E+01 |
| Hodgkins              | Herb.THC             | 5.964    | 2.585     | 2.13E-02 | 1.00E+00   | 1.66E+09 | 4.50E+01 |
| All Cancers nNMSC     | Tobacco:Herb.THC     | 0.550    | 0.072     | 3.83E-14 | 9.42E-12   | 6.84E+01 | 2.74E+01 |
| Myeloma               | Resin.THC            | 0.701    | 0.100     | 5.36E-12 | 1.24E-09   | 3.04E+01 | 1.39E+01 |



|                       |                              |       |       |          |          |          |          |
|-----------------------|------------------------------|-------|-------|----------|----------|----------|----------|
| Colorectum            | LM.Cannabis                  | 1.849 | 0.144 | 1.17E-35 | 3.34E-33 | 1.85E+01 | 1.30E+01 |
| Stomach               | LM.Cannabis                  | 1.415 | 0.117 | 1.01E-31 | 2.83E-29 | 1.60E+01 | 1.12E+01 |
| Larynx                | Resin.THC                    | 1.146 | 0.165 | 5.97E-12 | 1.38E-09 | 2.22E+01 | 1.09E+01 |
| Bladder               | Herb.THC                     | 6.672 | 3.094 | 3.12E-02 | 1.00E+00 | 4.30E+07 | 9.07E+00 |
| Thyroid               | LM.Cannabis                  | 0.650 | 0.074 | 9.63E-18 | 2.46E-15 | 9.78E+00 | 6.61E+00 |
| Larynx                | LM.Cannabis                  | 0.756 | 0.083 | 2.19E-19 | 5.72E-17 | 9.40E+00 | 6.51E+00 |
| Breast                | LM.Cannabis                  | 0.834 | 0.110 | 5.40E-14 | 1.31E-11 | 7.07E+00 | 4.84E+00 |
| Hodgkins              | LM.Cannabis                  | 0.335 | 0.054 | 1.12E-09 | 2.41E-07 | 5.78E+00 | 3.81E+00 |
| Leukaemia - Lymphoid  | Alcohol                      | 0.138 | 0.026 | 6.53E-07 | 1.27E-04 | 6.29E+00 | 3.73E+00 |
| Colorectum            | Resin.THC                    | 1.177 | 0.285 | 3.88E-05 | 6.68E-03 | 7.85E+00 | 3.67E+00 |
| Leukaemia - Myeloid   | Alcohol                      | 0.262 | 0.053 | 2.23E-06 | 4.13E-04 | 5.85E+00 | 3.45E+00 |
| Colorectum            | Tobacco:LM.Cannabis:Herb.THC | 0.726 | 0.088 | 3.53E-16 | 8.87E-14 | 4.27E+00 | 3.34E+00 |
| Bladder               | Resin.THC                    | 0.515 | 0.138 | 2.03E-04 | 3.29E-02 | 6.83E+00 | 3.12E+00 |
| Gallbladder & Biliary | Tobacco:LM.Cannabis:Herb.THC | 0.265 | 0.037 | 1.35E-12 | 3.17E-10 | 4.09E+00 | 3.10E+00 |
| Thyroid               | Tobacco:LM.Cannabis:Herb.THC | 0.319 | 0.044 | 8.30E-13 | 1.96E-10 | 3.90E+00 | 3.00E+00 |
| Anus                  | Tobacco:LM.Cannabis:Herb.THC | 0.213 | 0.034 | 8.03E-10 | 1.75E-07 | 3.39E+00 | 2.59E+00 |
| Corpus Uteri          | LM.Cannabis                  | 0.666 | 0.153 | 1.43E-05 | 2.54E-03 | 3.71E+00 | 2.41E+00 |
| Hodgkins              | Resin.THC                    | 0.343 | 0.114 | 2.61E-03 | 3.50E-01 | 5.98E+00 | 2.40E+00 |
| Breast                | Tobacco:LM.Cannabis:Herb.THC | 0.381 | 0.067 | 1.96E-08 | 4.02E-06 | 3.08E+00 | 2.34E+00 |
| Lung                  | Resin.THC                    | 0.301 | 0.100 | 2.59E-03 | 3.49E-01 | 5.15E+00 | 2.25E+00 |
| Testis                | Income                       | 0.522 | 0.107 | 1.21E-06 | 2.30E-04 | 2.94E+00 | 2.17E+00 |
| All Cancers           | Tobacco:LM.Cannabis:Herb.THC | 0.215 | 0.072 | 2.89E-03 | 3.84E-01 | 4.69E+00 | 2.14E+00 |
| Stomach               | Tobacco:LM.Cannabis:Herb.THC | 0.362 | 0.072 | 5.39E-07 | 1.06E-04 | 2.82E+00 | 2.13E+00 |
| Oropharynx            | Tobacco                      | 0.111 | 0.027 | 6.00E-05 | 1.01E-02 | 2.86E+00 | 2.02E+00 |
| Prostate              | LM.Cannabis                  | 0.554 | 0.159 | 5.01E-04 | 7.61E-02 | 3.08E+00 | 1.94E+00 |
| Gallbladder & Biliary | Tobacco                      | 0.093 | 0.006 | 1.26E-45 | 3.66E-43 | 2.02E+00 | 1.91E+00 |
| Gallbladder & Biliary | LM.Cannabis                  | 0.200 | 0.062 | 1.30E-03 | 1.89E-01 | 3.19E+00 | 1.89E+00 |
| All Cancers           | Alcohol                      | 0.072 | 0.011 | 6.55E-10 | 1.45E-07 | 2.11E+00 | 1.81E+00 |
| Testis                | LM.Cannabis                  | 0.533 | 0.171 | 1.84E-03 | 2.63E-01 | 2.99E+00 | 1.80E+00 |
| Hodgkins              | Tobacco:LM.Cannabis:Herb.THC | 0.125 | 0.032 | 1.04E-04 | 1.72E-02 | 2.45E+00 | 1.79E+00 |

|                       |                              |       |       |          |          |          |          |
|-----------------------|------------------------------|-------|-------|----------|----------|----------|----------|
| Larynx                | Alcohol                      | 0.121 | 0.012 | 1.24E-23 | 3.33E-21 | 1.91E+00 | 1.76E+00 |
| Kidney                | Tobacco:LM.Cannabis:Herb.THC | 0.162 | 0.044 | 2.13E-04 | 3.41E-02 | 2.34E+00 | 1.71E+00 |
| Brain                 | Income                       | 0.148 | 0.033 | 1.09E-05 | 1.96E-03 | 2.15E+00 | 1.70E+00 |
| Myeloma               | Tobacco:LM.Cannabis:Herb.THC | 0.103 | 0.028 | 2.89E-04 | 4.50E-02 | 2.36E+00 | 1.70E+00 |
| Oesophagus            | Tobacco:LM.Cannabis:Herb.THC | 0.195 | 0.053 | 2.68E-04 | 4.24E-02 | 2.32E+00 | 1.69E+00 |
| Breast                | Income                       | 0.200 | 0.048 | 2.98E-05 | 5.16E-03 | 2.10E+00 | 1.66E+00 |
| Liver                 | Tobacco:LM.Cannabis:Herb.THC | 0.157 | 0.046 | 6.92E-04 | 1.04E-01 | 2.29E+00 | 1.63E+00 |
| Non-Hodgkins lymphoma | Tobacco:Herb.THC             | 0.344 | 0.132 | 9.62E-03 | 1.00E+00 | 3.27E+00 | 1.63E+00 |
| Oropharynx            | Tobacco:LM.Cannabis          | 0.086 | 0.028 | 2.24E-03 | 3.11E-01 | 2.44E+00 | 1.63E+00 |
| Myeloma               | LM.Cannabis                  | 0.135 | 0.048 | 5.05E-03 | 6.52E-01 | 2.77E+00 | 1.62E+00 |
| Prostate              | Income                       | 0.279 | 0.069 | 5.83E-05 | 9.91E-03 | 2.06E+00 | 1.62E+00 |
| Colorectum            | Tobacco                      | 0.119 | 0.009 | 2.97E-37 | 8.49E-35 | 1.58E+00 | 1.52E+00 |
| Breast                | Tobacco                      | 0.088 | 0.007 | 3.68E-35 | 1.04E-32 | 1.57E+00 | 1.50E+00 |
| Prostate              | Tobacco:LM.Cannabis:Herb.THC | 0.281 | 0.097 | 3.90E-03 | 5.11E-01 | 2.06E+00 | 1.45E+00 |
| Stomach               | Tobacco                      | 0.081 | 0.007 | 5.69E-27 | 1.55E-24 | 1.51E+00 | 1.45E+00 |
| Colorectum            | Alcohol                      | 0.120 | 0.020 | 5.07E-09 | 1.06E-06 | 1.58E+00 | 1.44E+00 |
| All Cancers nNMSC     | Tobacco:LM.Cannabis          | 0.017 | 0.002 | 6.89E-24 | 1.86E-21 | 1.47E+00 | 1.40E+00 |
| Testis                | Tobacco:LM.Cannabis:Herb.THC | 0.264 | 0.101 | 9.25E-03 | 1.00E+00 | 2.00E+00 | 1.36E+00 |
| Pancreas              | Tobacco:LM.Cannabis:Herb.THC | 0.112 | 0.043 | 9.81E-03 | 1.00E+00 | 1.97E+00 | 1.34E+00 |
| Corpus Uteri          | Tobacco                      | 0.073 | 0.010 | 4.44E-14 | 1.09E-11 | 1.40E+00 | 1.33E+00 |
| Oesophagus            | Alcohol                      | 0.055 | 0.012 | 1.12E-05 | 2.00E-03 | 1.48E+00 | 1.32E+00 |
| Testis                | Tobacco                      | 0.075 | 0.012 | 3.13E-09 | 6.64E-07 | 1.39E+00 | 1.30E+00 |
| Prostate              | Tobacco                      | 0.069 | 0.010 | 8.15E-12 | 1.87E-09 | 1.37E+00 | 1.30E+00 |
| Stomach               | Alcohol                      | 0.067 | 0.017 | 7.62E-05 | 1.28E-02 | 1.44E+00 | 1.28E+00 |
| Ovary                 | Tobacco                      | 0.052 | 0.008 | 1.06E-10 | 2.36E-08 | 1.36E+00 | 1.28E+00 |
| Liver                 | Tobacco:LM.Cannabis          | 0.016 | 0.002 | 2.54E-11 | 5.74E-09 | 1.25E+00 | 1.20E+00 |
| Breast                | Alcohol                      | 0.048 | 0.016 | 2.14E-03 | 3.00E-01 | 1.37E+00 | 1.20E+00 |
| Melanoma              | Tobacco:LM.Cannabis          | 0.019 | 0.003 | 4.89E-11 | 1.10E-08 | 1.24E+00 | 1.19E+00 |
| Lung                  | Tobacco:LM.Cannabis          | 0.011 | 0.002 | 4.76E-11 | 1.07E-08 | 1.24E+00 | 1.19E+00 |

|                          |                     |       |       |          |          |          |          |
|--------------------------|---------------------|-------|-------|----------|----------|----------|----------|
| Bladder                  | LM.Cannabis         | 0.145 | 0.069 | 3.63E-02 | 1.00E+00 | 2.24E+00 | 1.18E+00 |
| Pancreas                 | Tobacco:LM.Cannabis | 0.014 | 0.002 | 9.55E-10 | 2.07E-07 | 1.23E+00 | 1.18E+00 |
| Larynx                   | Tobacco             | 0.019 | 0.005 | 2.06E-04 | 3.32E-02 | 1.25E+00 | 1.16E+00 |
| Cervix                   | Alcohol             | 0.060 | 0.022 | 6.45E-03 | 8.20E-01 | 1.35E+00 | 1.16E+00 |
| Kidney                   | Tobacco:LM.Cannabis | 0.012 | 0.002 | 5.20E-07 | 1.02E-04 | 1.20E+00 | 1.15E+00 |
| Prostate                 | Alcohol             | 0.058 | 0.023 | 9.90E-03 | 1.00E+00 | 1.33E+00 | 1.14E+00 |
| Oesophagus               | Tobacco:LM.Cannabis | 0.013 | 0.003 | 7.85E-06 | 1.42E-03 | 1.19E+00 | 1.13E+00 |
| Non-Hodgkins<br>lymphoma | Resin.THC           | 0.374 | 0.188 | 4.71E-02 | 1.00E+00 | 3.50E+00 | 1.12E+00 |
| Bladder                  | Tobacco             | 0.012 | 0.004 | 6.51E-03 | 8.20E-01 | 1.21E+00 | 1.10E+00 |
| Non-Hodgkins<br>lymphoma | Tobacco:LM.Cannabis | 0.010 | 0.003 | 7.32E-04 | 1.09E-01 | 1.16E+00 | 1.10E+00 |
| Thyroid                  | Alcohol             | 0.027 | 0.013 | 3.21E-02 | 1.00E+00 | 1.34E+00 | 1.08E+00 |
| Brain                    | Tobacco             | 0.011 | 0.005 | 2.49E-02 | 1.00E+00 | 1.19E+00 | 1.06E+00 |
| Anus                     | Tobacco:LM.Cannabis | 0.004 | 0.002 | 2.71E-02 | 1.00E+00 | 1.13E+00 | 1.04E+00 |

Supplementary Table S30.: Summary by Terms of Significant Positive

Terms from Interactive Panel Regression at Two Temporal Lags

| Term                         | Count | Negative<br>Total of P-<br>Value<br>Exponents | Mean of the<br>Negative P-<br>Value<br>Exponents | Median of<br>the Negative<br>P-Value<br>Exponents | Total of the<br>Lower E-<br>Value<br>Exponents | Mean of the<br>Lower E-<br>Value<br>Exponents | Median of<br>the Lower E-<br>Value<br>Exponents |
|------------------------------|-------|-----------------------------------------------|--------------------------------------------------|---------------------------------------------------|------------------------------------------------|-----------------------------------------------|-------------------------------------------------|
| Herb.THC                     | 18    | 121                                           | 6.72                                             | 4.5                                               | 176                                            | 9.78                                          | 10.5                                            |
| Resin.THC                    | 9     | 74                                            | 8.22                                             | 4                                                 | 19                                             | 2.11                                          | 0                                               |
| LM.Cannabis : Herb.THC       | 1     | 1                                             | 1                                                | 1                                                 | 3                                              | 3.00                                          | 3                                               |
| Tobacco : Herb.THC           | 3     | 23                                            | 7.67                                             | 8                                                 | 3                                              | 1.00                                          | 1                                               |
| Last.Month.Cannabis          | 12    | 135                                           | 11.25                                            | 6                                                 | 2                                              | 0.17                                          | 0                                               |
| Income                       | 5     | 22                                            | 4.4                                              | 4                                                 | 2                                              | 0.4                                           | 0                                               |
| Alcohol                      | 11    | 65                                            | 5.91                                             | 4                                                 | 0                                              | 0                                             | 0                                               |
| Tobacco                      | 12    | 194                                           | 16.17                                            | 10                                                | 0                                              | 0                                             | 0                                               |
| Tobacco : LM.Cannabis        | 10    | 79                                            | 7.90                                             | 7.5                                               | 0                                              | 0                                             | 0                                               |
| Tobacco:LM.Cannabis:Herb.THC | 15    | 83                                            | 5.53                                             | 3                                                 | 0                                              | 0                                             | 0                                               |

Supplementary Table S31.: Complete Model Output from  
Interactive Panel Regression at Four Temporal Lags

| Cancer                | Term                 | $\beta$ -Estimate | Std. Error | P-Value  | P.Adj.Holm | E-Value Estimate | 95% Lower Bound of the E-Value |
|-----------------------|----------------------|-------------------|------------|----------|------------|------------------|--------------------------------|
| Oropharynx            | LM.Cannabis:Herb.THC | 34.320            | 7.372      | 1.12E-05 | 0.0021349  | 2.11E+95         | 2.49E+55                       |
| Colorectum            | Herb.THC             | 92.213            | 8.721      | 8.28E-25 | 2.31E-22   | 3.79E+46         | 1.04E+38                       |
| Gallbladder & Biliary | Herb.THC             | 29.693            | 3.555      | 4.60E-16 | 1.19E-13   | 1.61E+42         | 2.47E+32                       |
| Thyroid               | Herb.THC             | 33.741            | 4.103      | 1.03E-15 | 2.63E-13   | 3.50E+39         | 1.62E+30                       |
| Breast                | Herb.THC             | 51.744            | 6.784      | 5.76E-14 | 1.43E-11   | 5.52E+33         | 1.47E+25                       |
| Anus                  | Herb.THC             | 24.891            | 3.505      | 3.19E-12 | 7.62E-10   | 1.56E+34         | 7.22E+24                       |
| Oropharynx            | Resin.THC            | 9.947             | 1.105      | 3.68E-14 | 9.19E-12   | 6.95E+27         | 7.23E+21                       |
| Oesophagus            | Herb.THC             | 31.178            | 5.101      | 1.42E-09 | 3.25E-07   | 1.12E+27         | 3.09E+18                       |
| Myeloma               | Herb.THC             | 15.860            | 2.788      | 1.93E-08 | 4.18E-06   | 2.76E+27         | 1.28E+18                       |
| All Cancers           | Herb.THC             | 13.310            | 2.871      | 4.70E-06 | 9.20E-04   | 3.99E+26         | 3.19E+15                       |
| Melanoma              | Herb.THC             | 24.578            | 5.069      | 1.45E-06 | 2.91E-04   | 3.61E+21         | 9.59E+12                       |
| Liver                 | Herb.THC             | 19.895            | 4.541      | 1.38E-05 | 0.0025785  | 9.79E+21         | 2.02E+12                       |
| Hodgkins              | Herb.THC             | 13.432            | 3.190      | 2.89E-05 | 0.0052919  | 2.48E+20         | 1.15E+11                       |
| Testis                | Herb.THC             | 45.669            | 10.959     | 3.49E-05 | 0.0062793  | 1.53E+20         | 7.12E+10                       |
| Oropharynx_Broad      | Herb.THC             | 21.554            | 7.876      | 6.52E-03 | 0.827903   | 1.32E+23         | 6.45E+06                       |
| Bladder               | Herb.THC             | 13.187            | 4.024      | 1.09E-03 | 0.1682717  | 4.41E+14         | 1.21E+06                       |
| Oropharynx            | Tobacco:Herb.THC     | 1.120             | 0.180      | 1.69E-08 | 3.69E-06   | 2.52E+03         | 2.65E+02                       |
| Stomach               | Herb.THC             | 17.035            | 7.068      | 1.61E-02 | 1          | 7.08E+10         | 1.94E+02                       |
| Oropharynx_Broad      | LM.Cannabis          | 6.254             | 2.287      | 6.55E-03 | 0.827903   | 8.37E+06         | 1.53E+02                       |
| Oesophagus            | Resin.THC            | 1.932             | 0.206      | 5.48E-20 | 1.47E-17   | 9.03E+01         | 4.04E+01                       |
| Colorectum            | LM.Cannabis          | 2.338             | 0.184      | 2.13E-34 | 6.15E-32   | 2.93E+01         | 1.92E+01                       |
| Thyroid               | LM.Cannabis          | 0.980             | 0.087      | 3.18E-27 | 9.00E-25   | 2.71E+01         | 1.70E+01                       |

|                       |                              |       |       |          |           |          |          |
|-----------------------|------------------------------|-------|-------|----------|-----------|----------|----------|
| Myeloma               | Resin.THC                    | 0.719 | 0.116 | 9.36E-10 | 2.16E-07  | 3.35E+01 | 1.34E+01 |
| Larynx                | Resin.THC                    | 1.162 | 0.197 | 5.11E-09 | 1.14E-06  | 2.16E+01 | 9.45E+00 |
| Stomach               | LM.Cannabis                  | 1.329 | 0.149 | 2.34E-18 | 6.22E-16  | 1.28E+01 | 8.25E+00 |
| Hodgkins              | LM.Cannabis                  | 0.553 | 0.067 | 1.24E-15 | 3.16E-13  | 1.29E+01 | 7.99E+00 |
| Larynx                | LM.Cannabis                  | 0.868 | 0.103 | 1.04E-16 | 2.70E-14  | 1.15E+01 | 7.42E+00 |
| Cervix                | LM.Cannabis:Herb.THC         | 8.526 | 3.781 | 2.44E-02 | 1         | 1.75E+04 | 6.12E+00 |
| Breast                | LM.Cannabis                  | 1.063 | 0.144 | 2.98E-13 | 7.31E-11  | 9.20E+00 | 5.86E+00 |
| Thyroid               | Tobacco:LM.Cannabis:Herb.THC | 0.505 | 0.050 | 9.13E-23 | 2.50E-20  | 7.19E+00 | 5.41E+00 |
| Colorectum            | Tobacco:LM.Cannabis:Herb.THC | 1.066 | 0.113 | 3.06E-20 | 8.30E-18  | 6.31E+00 | 4.75E+00 |
| Gallbladder & Biliary | Tobacco:LM.Cannabis:Herb.THC | 0.312 | 0.044 | 2.95E-12 | 7.07E-10  | 4.95E+00 | 3.59E+00 |
| Myeloma               | LM.Cannabis                  | 0.297 | 0.059 | 6.19E-07 | 1.26E-04  | 5.89E+00 | 3.50E+00 |
| Oropharynx            | Tobacco:LM.Cannabis          | 0.157 | 0.024 | 6.02E-09 | 1.34E-06  | 4.89E+00 | 3.43E+00 |
| Hodgkins              | Resin.THC                    | 0.459 | 0.132 | 5.58E-04 | 0.0898609 | 9.20E+00 | 3.40E+00 |
| Leukaemia - Myeloid   | Alcohol                      | 0.269 | 0.066 | 8.04E-05 | 0.0139935 | 6.31E+00 | 3.21E+00 |
| Hodgkins              | Tobacco:LM.Cannabis:Herb.THC | 0.236 | 0.038 | 1.52E-09 | 3.45E-07  | 3.93E+00 | 2.87E+00 |
| Leukaemia - Lymphoid  | Alcohol                      | 0.119 | 0.032 | 2.61E-04 | 0.0435782 | 5.67E+00 | 2.84E+00 |
| Anus                  | Tobacco:LM.Cannabis:Herb.THC | 0.247 | 0.042 | 7.88E-09 | 1.73E-06  | 3.77E+00 | 2.74E+00 |
| Colorectum            | Resin.THC                    | 1.124 | 0.352 | 1.47E-03 | 0.2226953 | 6.79E+00 | 2.69E+00 |
| Myeloma               | Tobacco:LM.Cannabis:Herb.THC | 0.190 | 0.034 | 2.58E-08 | 5.56E-06  | 3.64E+00 | 2.64E+00 |
| Breast                | Tobacco:LM.Cannabis:Herb.THC | 0.494 | 0.089 | 3.60E-08 | 7.71E-06  | 3.59E+00 | 2.60E+00 |
| Lung                  | Resin.THC                    | 0.350 | 0.116 | 2.49E-03 | 0.3617381 | 6.33E+00 | 2.47E+00 |
| All Cancers           | Tobacco:LM.Cannabis:Herb.THC | 0.253 | 0.081 | 1.92E-03 | 0.2848745 | 5.77E+00 | 2.44E+00 |
| Testis                | LM.Cannabis                  | 0.809 | 0.232 | 5.12E-04 | 0.0829502 | 3.93E+00 | 2.21E+00 |
| Gallbladder & Biliary | LM.Cannabis                  | 0.261 | 0.079 | 9.97E-04 | 0.156563  | 4.09E+00 | 2.18E+00 |
| Liver                 | Tobacco:LM.Cannabis:Herb.THC | 0.230 | 0.054 | 2.17E-05 | 0.0039876 | 2.96E+00 | 2.08E+00 |
| Oesophagus            | Tobacco:LM.Cannabis:Herb.THC | 0.274 | 0.066 | 3.76E-05 | 0.0066981 | 2.83E+00 | 1.99E+00 |
| Gallbladder & Biliary | Tobacco                      | 0.102 | 0.008 | 4.70E-36 | 1.36E-33  | 2.13E+00 | 1.99E+00 |
| Brain                 | Tobacco:Herb.THC             | 0.419 | 0.148 | 4.73E-03 | 0.6338577 | 4.43E+00 | 1.99E+00 |
| Testis                | Income                       | 0.520 | 0.133 | 1.05E-04 | 0.0181315 | 2.76E+00 | 1.92E+00 |
| Corpus Uteri          | LM.Cannabis                  | 0.587 | 0.198 | 3.14E-03 | 0.4399844 | 3.16E+00 | 1.78E+00 |

|                   |                              |       |       |          |           |          |          |
|-------------------|------------------------------|-------|-------|----------|-----------|----------|----------|
| Larynx            | Alcohol                      | 0.128 | 0.015 | 1.22E-17 | 3.22E-15  | 1.93E+00 | 1.76E+00 |
| Cervix            | Tobacco:Herb.THC             | 0.785 | 0.304 | 9.85E-03 | 1         | 4.04E+00 | 1.75E+00 |
| Brain             | Income                       | 0.161 | 0.041 | 8.51E-05 | 0.0147164 | 2.19E+00 | 1.67E+00 |
| All Cancers       | Alcohol                      | 0.061 | 0.013 | 5.80E-06 | 0.0011256 | 1.96E+00 | 1.62E+00 |
| Breast            | Income                       | 0.218 | 0.060 | 2.97E-04 | 0.0489266 | 2.11E+00 | 1.59E+00 |
| Stomach           | Tobacco:LM.Cannabis:Herb.THC | 0.283 | 0.092 | 2.06E-03 | 0.3030811 | 2.36E+00 | 1.59E+00 |
| Colorectum        | Tobacco                      | 0.147 | 0.012 | 8.63E-31 | 2.49E-28  | 1.65E+00 | 1.57E+00 |
| Testis            | Tobacco:LM.Cannabis:Herb.THC | 0.396 | 0.132 | 2.84E-03 | 0.4051248 | 2.34E+00 | 1.56E+00 |
| Breast            | Tobacco                      | 0.097 | 0.010 | 4.73E-23 | 1.30E-20  | 1.58E+00 | 1.50E+00 |
| Melanoma          | Tobacco:LM.Cannabis:Herb.THC | 0.185 | 0.066 | 5.49E-03 | 0.718574  | 2.25E+00 | 1.47E+00 |
| Stomach           | Tobacco                      | 0.078 | 0.010 | 1.61E-14 | 4.04E-12  | 1.48E+00 | 1.39E+00 |
| Oropharynx_Broad  | Tobacco                      | 0.098 | 0.036 | 5.89E-03 | 0.7595198 | 1.86E+00 | 1.35E+00 |
| Colorectum        | Alcohol                      | 0.109 | 0.026 | 3.19E-05 | 0.0058109 | 1.53E+00 | 1.34E+00 |
| Prostate          | Income                       | 0.232 | 0.087 | 7.59E-03 | 0.9333969 | 1.85E+00 | 1.33E+00 |
| Testis            | Tobacco                      | 0.087 | 0.018 | 9.88E-07 | 1.99E-04  | 1.41E+00 | 1.29E+00 |
| Myeloma           | Income                       | 0.079 | 0.034 | 1.98E-02 | 1         | 2.07E+00 | 1.29E+00 |
| Hodgkins          | Alcohol                      | 0.035 | 0.011 | 1.02E-03 | 0.1593218 | 1.51E+00 | 1.28E+00 |
| All Cancers nNMSC | Tobacco:LM.Cannabis          | 0.012 | 0.002 | 7.07E-07 | 1.43E-04  | 1.37E+00 | 1.27E+00 |
| Corpus Uteri      | Tobacco                      | 0.069 | 0.013 | 3.00E-07 | 6.21E-05  | 1.36E+00 | 1.27E+00 |
| Larynx            | Tobacco:LM.Cannabis:Herb.THC | 0.146 | 0.063 | 2.14E-02 | 1         | 2.04E+00 | 1.27E+00 |
| Thyroid           | Alcohol                      | 0.042 | 0.014 | 2.57E-03 | 0.3699626 | 1.48E+00 | 1.24E+00 |
| Stomach           | Alcohol                      | 0.068 | 0.021 | 1.39E-03 | 0.2109464 | 1.44E+00 | 1.24E+00 |
| Prostate          | Tobacco                      | 0.061 | 0.014 | 1.14E-05 | 0.0021569 | 1.33E+00 | 1.23E+00 |
| Ovary             | Tobacco                      | 0.047 | 0.011 | 2.03E-05 | 0.0037506 | 1.32E+00 | 1.22E+00 |
| Pancreas          | Tobacco:LM.Cannabis          | 0.016 | 0.003 | 1.32E-09 | 3.01E-07  | 1.26E+00 | 1.20E+00 |
| Lung              | Tobacco:LM.Cannabis          | 0.011 | 0.002 | 6.83E-09 | 1.51E-06  | 1.25E+00 | 1.19E+00 |
| Oesophagus        | Alcohol                      | 0.043 | 0.015 | 4.75E-03 | 0.6338577 | 1.40E+00 | 1.19E+00 |
| All Cancers nNMSC | Tobacco:Herb.THC             | 0.213 | 0.107 | 4.65E-02 | 1         | 7.37E+00 | 1.19E+00 |
| Kidney            | Tobacco:LM.Cannabis          | 0.014 | 0.003 | 2.20E-07 | 4.60E-05  | 1.23E+00 | 1.18E+00 |
| Breast            | Alcohol                      | 0.055 | 0.020 | 7.36E-03 | 0.9130061 | 1.39E+00 | 1.17E+00 |

|                       |                              |       |       |          |           |          |          |
|-----------------------|------------------------------|-------|-------|----------|-----------|----------|----------|
| Bladder               | Tobacco                      | 0.020 | 0.006 | 6.23E-04 | 0.0997405 | 1.28E+00 | 1.17E+00 |
| Melanoma              | Tobacco:LM.Cannabis          | 0.016 | 0.003 | 5.53E-06 | 0.0010786 | 1.21E+00 | 1.15E+00 |
| Liver                 | Tobacco:LM.Cannabis          | 0.012 | 0.003 | 3.71E-05 | 0.0066328 | 1.21E+00 | 1.15E+00 |
| Larynx                | Tobacco                      | 0.020 | 0.007 | 3.22E-03 | 0.4470402 | 1.25E+00 | 1.13E+00 |
| Thyroid               | Tobacco                      | 0.018 | 0.007 | 7.95E-03 | 0.9622921 | 1.27E+00 | 1.13E+00 |
| Oesophagus            | Tobacco:LM.Cannabis          | 0.011 | 0.003 | 1.81E-03 | 0.2719305 | 1.17E+00 | 1.10E+00 |
| Non-Hodgkins lymphoma | Tobacco:LM.Cannabis          | 0.012 | 0.004 | 2.83E-03 | 0.4051248 | 1.17E+00 | 1.09E+00 |
| Kidney                | Tobacco:LM.Cannabis:Herb.THC | 0.102 | 0.052 | 4.97E-02 | 1         | 1.91E+00 | 1.04E+00 |
| Corpus Uteri          | Alcohol                      | 0.002 | 0.028 | 9.41E-01 | 1         | 1.05E+00 | 1.00E+00 |
| Brain                 | Tobacco                      | 0.002 | 0.007 | 7.27E-01 | 1         | 1.08E+00 | 1.00E+00 |
| Anus                  | Tobacco:LM.Cannabis          | 0.003 | 0.002 | 1.45E-01 | 1         | 1.12E+00 | 1.00E+00 |
| Brain                 | Tobacco:LM.Cannabis          | 0.005 | 0.003 | 1.16E-01 | 1         | 1.12E+00 | 1.00E+00 |
| Anus                  | Tobacco                      | 0.003 | 0.006 | 5.38E-01 | 1         | 1.12E+00 | 1.00E+00 |
| Cervix                | Tobacco:LM.Cannabis          | 0.010 | 0.006 | 1.13E-01 | 1         | 1.12E+00 | 1.00E+00 |
| Hodgkins              | Tobacco                      | 0.005 | 0.005 | 3.44E-01 | 1         | 1.15E+00 | 1.00E+00 |
| Prostate              | Tobacco:Herb.THC             | 0.018 | 0.316 | 9.55E-01 | 1         | 1.16E+00 | 1.00E+00 |
| Myeloma               | Alcohol                      | 0.005 | 0.009 | 5.98E-01 | 1         | 1.16E+00 | 1.00E+00 |
| Testis                | Alcohol                      | 0.035 | 0.037 | 3.39E-01 | 1         | 1.23E+00 | 1.00E+00 |
| Prostate              | Alcohol                      | 0.045 | 0.030 | 1.30E-01 | 1         | 1.27E+00 | 1.00E+00 |
| Cervix                | Alcohol                      | 0.052 | 0.028 | 6.94E-02 | 1         | 1.30E+00 | 1.00E+00 |
| Lung                  | Tobacco:LM.Cannabis:Herb.THC | 0.019 | 0.037 | 6.01E-01 | 1         | 1.35E+00 | 1.00E+00 |
| Kidney                | Tobacco:Herb.THC             | 0.029 | 0.128 | 8.19E-01 | 1         | 1.36E+00 | 1.00E+00 |
| Ovary                 | LM.Cannabis                  | 0.067 | 0.162 | 6.77E-01 | 1         | 1.41E+00 | 1.00E+00 |
| Leukaemia - Myeloid   | Tobacco:LM.Cannabis:Herb.THC | 0.022 | 0.236 | 9.27E-01 | 1         | 1.45E+00 | 1.00E+00 |
| Corpus Uteri          | Tobacco:LM.Cannabis:Herb.THC | 0.098 | 0.122 | 4.21E-01 | 1         | 1.46E+00 | 1.00E+00 |
| Oropharynx            | Alcohol                      | 0.017 | 0.059 | 7.76E-01 | 1         | 1.47E+00 | 1.00E+00 |
| Hodgkins              | Income                       | 0.031 | 0.039 | 4.17E-01 | 1         | 1.47E+00 | 1.00E+00 |
| Prostate              | Tobacco:LM.Cannabis:Herb.THC | 0.120 | 0.128 | 3.47E-01 | 1         | 1.52E+00 | 1.00E+00 |
| Non-Hodgkins lymphoma | Tobacco:LM.Cannabis:Herb.THC | 0.073 | 0.075 | 3.27E-01 | 1         | 1.55E+00 | 1.00E+00 |
| Pancreas              | Tobacco:LM.Cannabis:Herb.THC | 0.053 | 0.051 | 2.99E-01 | 1         | 1.55E+00 | 1.00E+00 |



|                       |                              |       |       |          |   |          |          |
|-----------------------|------------------------------|-------|-------|----------|---|----------|----------|
| Oropharynx_Broad      | Income                       | 0.075 | 0.063 | 2.39E-01 | 1 | 1.69E+00 | 1.00E+00 |
| Bladder               | Tobacco:LM.Cannabis:Herb.THC | 0.080 | 0.052 | 1.27E-01 | 1 | 1.74E+00 | 1.00E+00 |
| Pancreas              | Tobacco:Herb.THC             | 0.082 | 0.125 | 5.15E-01 | 1 | 1.77E+00 | 1.00E+00 |
| All Cancers nMSC      | Tobacco:LM.Cannabis:Herb.THC | 0.038 | 0.038 | 3.27E-01 | 1 | 1.87E+00 | 1.00E+00 |
| Bladder               | LM.Cannabis                  | 0.131 | 0.085 | 1.22E-01 | 1 | 2.12E+00 | 1.00E+00 |
| Prostate              | LM.Cannabis                  | 0.325 | 0.207 | 1.17E-01 | 1 | 2.14E+00 | 1.00E+00 |
| Lung                  | Tobacco:Herb.THC             | 0.120 | 0.092 | 1.90E-01 | 1 | 2.42E+00 | 1.00E+00 |
| Leukaemia - Myeloid   | Income                       | 0.097 | 0.306 | 7.52E-01 | 1 | 2.49E+00 | 1.00E+00 |
| Ovary                 | Tobacco:Herb.THC             | 0.369 | 0.246 | 1.34E-01 | 1 | 2.63E+00 | 1.00E+00 |
| Non-Hodgkins lymphoma | Tobacco:Herb.THC             | 0.286 | 0.179 | 1.10E-01 | 1 | 2.76E+00 | 1.00E+00 |
| Non-Hodgkins lymphoma | Resin.THC                    | 0.292 | 0.231 | 2.06E-01 | 1 | 2.80E+00 | 1.00E+00 |
| All Cancers           | LM.Cannabis                  | 0.123 | 0.291 | 6.72E-01 | 1 | 2.90E+00 | 1.00E+00 |
| Oropharynx_Broad      | Alcohol                      | 0.231 | 0.139 | 9.67E-02 | 1 | 2.91E+00 | 1.00E+00 |
| Bladder               | Resin.THC                    | 0.317 | 0.163 | 5.21E-02 | 1 | 3.85E+00 | 1.00E+00 |
| Leukaemia - Myeloid   | LM.Cannabis                  | 0.297 | 0.937 | 7.52E-01 | 1 | 7.28E+00 | 1.00E+00 |
| Oropharynx_Broad      | Tobacco:LM.Cannabis:Herb.THC | 0.579 | 0.546 | 2.90E-01 | 1 | 7.66E+00 | 1.00E+00 |
| Ovary                 | LM.Cannabis:Herb.THC         | 1.264 | 3.066 | 6.80E-01 | 1 | 9.99E+00 | 1.00E+00 |
| Leukaemia - Lymphoid  | LM.Cannabis                  | 0.235 | 0.450 | 6.03E-01 | 1 | 1.83E+01 | 1.00E+00 |
| Oropharynx            | Income                       | 0.376 | 0.248 | 1.32E-01 | 1 | 2.15E+01 | 1.00E+00 |
| Lung                  | Herb.THC                     | 1.039 | 2.860 | 7.16E-01 | 1 | 7.74E+01 | 1.00E+00 |
| Brain                 | LM.Cannabis:Herb.THC         | 1.981 | 1.844 | 2.83E-01 | 1 | 1.51E+02 | 1.00E+00 |
| Leukaemia - Myeloid   | LM.Cannabis:Herb.THC         | 1.351 | 8.047 | 8.67E-01 | 1 | 9.80E+02 | 1.00E+00 |
| Prostate              | Herb.THC                     | 7.192 | 9.839 | 4.65E-01 | 1 | 3.16E+03 | 1.00E+00 |
| Corpus Uteri          | Herb.THC                     | 8.034 | 9.413 | 3.94E-01 | 1 | 1.09E+04 | 1.00E+00 |
| Pancreas              | Herb.THC                     | 4.554 | 3.906 | 2.44E-01 | 1 | 2.54E+05 | 1.00E+00 |
| Leukaemia - Lymphoid  | LM.Cannabis:Herb.THC         | 1.347 | 3.864 | 7.28E-01 | 1 | 7.79E+05 | 1.00E+00 |
| Kidney                | Herb.THC                     | 5.315 | 3.984 | 1.83E-01 | 1 | 1.38E+06 | 1.00E+00 |
| Larynx                | Herb.THC                     | 6.741 | 4.871 | 1.67E-01 | 1 | 2.28E+06 | 1.00E+00 |
| Leukaemia - Myeloid   | Herb.THC                     | 3.274 | 8.166 | 6.89E-01 | 1 | 6.66E+06 | 1.00E+00 |
| Leukaemia - Lymphoid  | Herb.THC                     | 3.064 | 3.921 | 4.36E-01 | 1 | 1.03E+13 | 1.00E+00 |

|                       |                              |          |          |          |           |           |          |
|-----------------------|------------------------------|----------|----------|----------|-----------|-----------|----------|
| Kaposi                | Tobacco                      | 62.282   | 102.530  | 5.46E-01 | 1         | 1.02E+125 | 1.00E+00 |
| Kaposi                | Tobacco:LM.Cannabis:Herb.THC | 64.795   | 91.953   | 4.85E-01 | 1         | 1.10E+130 | 1.00E+00 |
| Kaposi                | LM.Cannabis                  | 846.442  | 1327.503 | 5.27E-01 | 1         | Inf       | 1.00E+00 |
| Kaposi                | LM.Cannabis:Herb.THC         | 2757.893 | 4512.526 | 5.44E-01 | 1         | Inf       | 1.00E+00 |
| Ovary                 | Tobacco:LM.Cannabis          | -0.004   | 0.005    | 4.83E-01 | 1         | 1.07E+00  | -        |
| Bladder               | Tobacco:LM.Cannabis          | -0.003   | 0.003    | 3.60E-01 | 1         | 1.09E+00  | -        |
| Cervix                | Tobacco                      | -0.008   | 0.013    | 5.67E-01 | 1         | 1.10E+00  | -        |
| Melanoma              | Tobacco                      | -0.005   | 0.007    | 5.25E-01 | 1         | 1.11E+00  | -        |
| Oesophagus            | Tobacco                      | -0.005   | 0.007    | 5.12E-01 | 1         | 1.11E+00  | -        |
| Prostate              | Tobacco:LM.Cannabis          | -0.011   | 0.007    | 1.05E-01 | 1         | 1.12E+00  | -        |
| Kidney                | Tobacco                      | -0.006   | 0.006    | 3.06E-01 | 1         | 1.14E+00  | -        |
| All Cancers           | Tobacco                      | -0.004   | 0.004    | 3.84E-01 | 1         | 1.15E+00  | -        |
| Myeloma               | Tobacco                      | -0.005   | 0.004    | 2.75E-01 | 1         | 1.16E+00  | -        |
| Corpus Uteri          | Tobacco:LM.Cannabis          | -0.019   | 0.006    | 3.04E-03 | 0.4292627 | 1.17E+00  | -        |
| Testis                | Tobacco:LM.Cannabis          | -0.027   | 0.007    | 3.35E-04 | 0.0550099 | 1.19E+00  | -        |
| Myeloma               | Tobacco:LM.Cannabis          | -0.007   | 0.002    | 1.13E-04 | 0.0192927 | 1.20E+00  | -        |
| Pancreas              | Tobacco                      | -0.012   | 0.006    | 2.81E-02 | 1         | 1.21E+00  | -        |
| Gallbladder & Biliary | Income                       | -0.010   | 0.043    | 8.12E-01 | 1         | 1.22E+00  | -        |
| All Cancers           | Tobacco:LM.Cannabis          | -0.008   | 0.009    | 3.86E-01 | 1         | 1.23E+00  | -        |
| Corpus Uteri          | Income                       | -0.036   | 0.083    | 6.61E-01 | 1         | 1.24E+00  | -        |
| Lung                  | Tobacco                      | -0.011   | 0.004    | 5.59E-03 | 0.7262569 | 1.25E+00  | -        |
| Leukaemia - Lymphoid  | Tobacco                      | -0.004   | 0.012    | 7.32E-01 | 1         | 1.25E+00  | -        |
| Gallbladder & Biliary | Tobacco:LM.Cannabis          | -0.013   | 0.002    | 3.93E-08 | 8.37E-06  | 1.26E+00  | -        |
| Larynx                | Tobacco:LM.Cannabis          | -0.023   | 0.003    | 9.73E-12 | 2.30E-09  | 1.27E+00  | -        |
| Corpus Uteri          | Tobacco:Herb.THC             | -0.045   | 0.302    | 8.81E-01 | 1         | 1.28E+00  | -        |
| Breast                | Tobacco:LM.Cannabis          | -0.033   | 0.005    | 2.67E-12 | 6.49E-10  | 1.28E+00  | -        |
| Ovary                 | Alcohol                      | -0.039   | 0.023    | 8.86E-02 | 1         | 1.29E+00  | -        |
| Hodgkins              | Tobacco:LM.Cannabis          | -0.016   | 0.002    | 2.86E-13 | 7.04E-11  | 1.30E+00  | -        |
| Stomach               | Tobacco:LM.Cannabis          | -0.041   | 0.005    | 6.99E-17 | 1.82E-14  | 1.31E+00  | -        |
| Oropharynx_Broad      | Resin.THC                    | -0.025   | 1.194    | 9.83E-01 | 1         | 1.32E+00  | -        |

|                       |                              |        |       |          |           |          |   |
|-----------------------|------------------------------|--------|-------|----------|-----------|----------|---|
| Ovary                 | Tobacco:LM.Cannabis:Herb.THC | -0.049 | 0.100 | 6.21E-01 | 1         | 1.33E+00 | - |
| Leukaemia - Myeloid   | Tobacco:LM.Cannabis          | -0.015 | 0.027 | 5.95E-01 | 1         | 1.34E+00 | - |
| Ovary                 | Income                       | -0.054 | 0.068 | 4.30E-01 | 1         | 1.35E+00 | - |
| Leukaemia - Lymphoid  | Tobacco:LM.Cannabis          | -0.008 | 0.013 | 5.62E-01 | 1         | 1.36E+00 | - |
| Oropharynx            | Tobacco                      | -0.012 | 0.021 | 5.68E-01 | 1         | 1.37E+00 | - |
| Liver                 | Tobacco                      | -0.031 | 0.007 | 1.88E-05 | 0.0035006 | 1.37E+00 | - |
| Colorectum            | Tobacco:LM.Cannabis          | -0.069 | 0.006 | 4.15E-29 | 1.18E-26  | 1.38E+00 | - |
| Thyroid               | Tobacco:LM.Cannabis          | -0.030 | 0.003 | 4.91E-25 | 1.37E-22  | 1.38E+00 | - |
| Non-Hodgkins lymphoma | Tobacco                      | -0.049 | 0.008 | 7.59E-10 | 1.76E-07  | 1.41E+00 | - |
| All Cancers nNMSC     | Tobacco                      | -0.017 | 0.005 | 2.13E-03 | 0.3105389 | 1.47E+00 | - |
| Brain                 | Tobacco:LM.Cannabis:Herb.THC | -0.053 | 0.060 | 3.80E-01 | 1         | 1.49E+00 | - |
| Leukaemia - Myeloid   | Tobacco                      | -0.025 | 0.025 | 3.26E-01 | 1         | 1.49E+00 | - |
| Brain                 | Alcohol                      | -0.056 | 0.014 | 5.37E-05 | 0.009444  | 1.52E+00 | - |
| Non-Hodgkins lymphoma | Alcohol                      | -0.074 | 0.017 | 9.77E-06 | 0.0018667 | 1.55E+00 | - |
| Lung                  | Alcohol                      | -0.040 | 0.009 | 3.39E-06 | 6.70E-04  | 1.57E+00 | - |
| Colorectum            | Income                       | -0.151 | 0.077 | 5.00E-02 | 1         | 1.67E+00 | - |
| Anus                  | Alcohol                      | -0.056 | 0.012 | 2.49E-06 | 4.95E-04  | 1.67E+00 | - |
| Thyroid               | Income                       | -0.087 | 0.050 | 8.20E-02 | 1         | 1.84E+00 | - |
| Melanoma              | Alcohol                      | -0.119 | 0.015 | 1.51E-14 | 3.81E-12  | 1.85E+00 | - |
| Cervix                | Income                       | -0.236 | 0.084 | 4.88E-03 | 0.6436394 | 1.89E+00 | - |
| Melanoma              | Income                       | -0.132 | 0.045 | 3.28E-03 | 0.4527736 | 1.93E+00 | - |
| Larynx                | Tobacco:Herb.THC             | -0.128 | 0.156 | 4.14E-01 | 1         | 1.93E+00 | - |
| Cervix                | Tobacco:LM.Cannabis:Herb.THC | -0.260 | 0.123 | 3.47E-02 | 1         | 1.97E+00 | - |
| Kidney                | Alcohol                      | -0.109 | 0.012 | 3.84E-19 | 1.03E-16  | 1.97E+00 | - |
| Stomach               | Tobacco:Herb.THC             | -0.220 | 0.227 | 3.32E-01 | 1         | 2.08E+00 | - |
| Bladder               | Alcohol                      | -0.128 | 0.012 | 1.02E-24 | 2.84E-22  | 2.10E+00 | - |
| Leukaemia - Lymphoid  | Tobacco:LM.Cannabis:Herb.THC | -0.034 | 0.113 | 7.65E-01 | 1         | 2.11E+00 | - |
| Pancreas              | Alcohol                      | -0.126 | 0.012 | 2.15E-25 | 6.03E-23  | 2.11E+00 | - |
| Liver                 | Alcohol                      | -0.135 | 0.015 | 4.10E-19 | 1.10E-16  | 2.16E+00 | - |
| Larynx                | Income                       | -0.201 | 0.043 | 3.38E-06 | 6.70E-04  | 2.40E+00 | - |

|                       |                      |        |       |          |           |          |   |
|-----------------------|----------------------|--------|-------|----------|-----------|----------|---|
| Anus                  | LM.Cannabis          | -0.135 | 0.074 | 6.93E-02 | 1         | 2.42E+00 | - |
| Kaposi                | Income               | -0.093 | 0.899 | 9.18E-01 | 1         | 2.44E+00 | - |
| Breast                | Resin.THC            | -0.302 | 0.276 | 2.75E-01 | 1         | 2.51E+00 | - |
| Liver                 | Income               | -0.182 | 0.053 | 6.73E-04 | 0.1069288 | 2.54E+00 | - |
| Oropharynx_Broad      | Tobacco:LM.Cannabis  | -0.194 | 0.071 | 6.61E-03 | 0.827903  | 2.59E+00 | - |
| Cervix                | LM.Cannabis          | -0.445 | 0.200 | 2.59E-02 | 1         | 2.59E+00 | - |
| Brain                 | LM.Cannabis          | -0.221 | 0.097 | 2.32E-02 | 1         | 2.62E+00 | - |
| Gallbladder & Biliary | Alcohol              | -0.156 | 0.014 | 3.38E-27 | 9.52E-25  | 2.70E+00 | - |
| Anus                  | Income               | -0.162 | 0.043 | 1.51E-04 | 0.0257445 | 2.72E+00 | - |
| Melanoma              | Resin.THC            | -0.264 | 0.207 | 2.02E-01 | 1         | 2.77E+00 | - |
| All Cancers nNMSC     | Alcohol              | -0.086 | 0.007 | 9.05E-30 | 2.58E-27  | 2.87E+00 | - |
| Oesophagus            | Income               | -0.313 | 0.045 | 7.26E-12 | 1.73E-09  | 3.11E+00 | - |
| Bladder               | Tobacco:Herb.THC     | -0.252 | 0.129 | 5.08E-02 | 1         | 3.17E+00 | - |
| Non-Hodgkins lymphoma | LM.Cannabis          | -0.372 | 0.119 | 1.83E-03 | 0.2732197 | 3.36E+00 | - |
| Oesophagus            | LM.Cannabis          | -0.345 | 0.108 | 1.37E-03 | 0.2098952 | 3.37E+00 | - |
| Stomach               | Income               | -0.512 | 0.062 | 7.08E-16 | 1.81E-13  | 3.57E+00 | - |
| Non-Hodgkins lymphoma | Income               | -0.407 | 0.049 | 6.78E-16 | 1.74E-13  | 3.62E+00 | - |
| Leukaemia - Myeloid   | Tobacco:Herb.THC     | -0.167 | 0.236 | 4.81E-01 | 1         | 3.73E+00 | - |
| Bladder               | Income               | -0.309 | 0.036 | 1.30E-17 | 3.41E-15  | 3.76E+00 | - |
| Liver                 | LM.Cannabis          | -0.319 | 0.093 | 6.84E-04 | 0.1081087 | 3.88E+00 | - |
| Leukaemia - Lymphoid  | Tobacco:Herb.THC     | -0.102 | 0.113 | 3.70E-01 | 1         | 4.74E+00 | - |
| Testis                | Resin.THC            | -1.128 | 0.455 | 1.34E-02 | 1         | 5.65E+00 | - |
| All Cancers           | Income               | -0.253 | 0.029 | 1.90E-17 | 4.97E-15  | 5.77E+00 | - |
| Lung                  | LM.Cannabis:Herb.THC | -0.341 | 1.142 | 7.65E-01 | 1         | 6.10E+00 | - |
| Melanoma              | LM.Cannabis          | -0.622 | 0.107 | 9.68E-09 | 2.12E-06  | 6.35E+00 | - |
| Lung                  | LM.Cannabis          | -0.370 | 0.060 | 1.18E-09 | 2.72E-07  | 6.83E+00 | - |
| Kidney                | LM.Cannabis          | -0.529 | 0.084 | 4.58E-10 | 1.07E-07  | 7.09E+00 | - |
| Liver                 | Tobacco:Herb.THC     | -0.547 | 0.149 | 2.74E-04 | 0.0454271 | 7.35E+00 | - |
| All Cancers           | Tobacco:Herb.THC     | -0.308 | 0.095 | 1.22E-03 | 0.1881044 | 7.59E+00 | - |
| Melanoma              | Tobacco:Herb.THC     | -0.713 | 0.163 | 1.33E-05 | 0.0024916 | 7.73E+00 | - |

|                       |                      |        |       |          |           |          |   |
|-----------------------|----------------------|--------|-------|----------|-----------|----------|---|
| Testis                | Tobacco:Herb.THC     | -1.450 | 0.364 | 7.55E-05 | 0.0132093 | 8.03E+00 | - |
| Pancreas              | LM.Cannabis          | -0.569 | 0.082 | 8.91E-12 | 2.11E-09  | 8.15E+00 | - |
| Hodgkins              | Tobacco:Herb.THC     | -0.443 | 0.106 | 3.36E-05 | 0.0060775 | 8.65E+00 | - |
| Lung                  | Income               | -0.444 | 0.025 | 2.75E-60 | 8.03E-58  | 9.03E+00 | - |
| Pancreas              | Income               | -0.626 | 0.034 | 1.47E-63 | 4.31E-61  | 9.52E+00 | - |
| Myeloma               | Tobacco:Herb.THC     | -0.420 | 0.093 | 6.87E-06 | 0.0013251 | 9.94E+00 | - |
| Kidney                | Income               | -0.669 | 0.035 | 7.43E-69 | 2.18E-66  | 1.03E+01 | - |
| Oesophagus            | Tobacco:Herb.THC     | -0.877 | 0.164 | 1.05E-07 | 2.22E-05  | 1.08E+01 | - |
| Stomach               | Resin.THC            | -1.464 | 0.286 | 3.72E-07 | 7.67E-05  | 1.56E+01 | - |
| Corpus Uteri          | Resin.THC            | -2.050 | 0.380 | 8.88E-08 | 1.88E-05  | 1.74E+01 | - |
| Anus                  | Tobacco:Herb.THC     | -0.704 | 0.116 | 2.42E-09 | 5.48E-07  | 1.77E+01 | - |
| Breast                | Tobacco:Herb.THC     | -1.543 | 0.218 | 2.74E-12 | 6.61E-10  | 1.93E+01 | - |
| All Cancers nNMSC     | LM.Cannabis          | -0.393 | 0.078 | 5.64E-07 | 1.16E-04  | 2.47E+01 | - |
| Leukaemia - Lymphoid  | Income               | -0.266 | 0.147 | 7.31E-02 | 1         | 2.48E+01 | - |
| Prostate              | Resin.THC            | -2.625 | 0.398 | 6.66E-11 | 1.57E-08  | 2.89E+01 | - |
| Oropharynx_Broad      | Tobacco:Herb.THC     | -1.154 | 0.306 | 1.94E-04 | 0.0325134 | 3.29E+01 | - |
| Brain                 | Resin.THC            | -1.375 | 0.187 | 3.94E-13 | 9.61E-11  | 3.97E+01 | - |
| All Cancers nNMSC     | Income               | -0.472 | 0.022 | 1.94E-84 | 5.75E-82  | 4.16E+01 | - |
| Ovary                 | Resin.THC            | -2.332 | 0.311 | 1.36E-13 | 3.36E-11  | 4.22E+01 | - |
| Cervix                | Resin.THC            | -2.927 | 0.383 | 5.10E-14 | 1.27E-11  | 4.46E+01 | - |
| Leukaemia - Myeloid   | Resin.THC            | -0.680 | 1.055 | 5.20E-01 | 1         | 4.48E+01 | - |
| Colorectum            | Tobacco:Herb.THC     | -2.734 | 0.280 | 1.41E-21 | 3.85E-19  | 4.66E+01 | - |
| Thyroid               | Tobacco:Herb.THC     | -1.194 | 0.136 | 1.58E-17 | 4.15E-15  | 4.85E+01 | - |
| Pancreas              | LM.Cannabis:Herb.THC | -1.303 | 1.560 | 4.04E-01 | 1         | 5.71E+01 | - |
| All Cancers nNMSC     | Resin.THC            | -0.522 | 0.116 | 7.07E-06 | 0.0013569 | 5.77E+01 | - |
| Non-Hodgkins lymphoma | LM.Cannabis:Herb.THC | -2.020 | 2.276 | 3.75E-01 | 1         | 7.93E+01 | - |
| Prostate              | LM.Cannabis:Herb.THC | -3.765 | 3.930 | 3.38E-01 | 1         | 9.41E+01 | - |
| Corpus Uteri          | LM.Cannabis:Herb.THC | -3.619 | 3.760 | 3.36E-01 | 1         | 9.58E+01 | - |
| Gallbladder & Biliary | Tobacco:Herb.THC     | -1.209 | 0.123 | 2.75E-21 | 7.48E-19  | 1.01E+02 | - |
| Kidney                | Resin.THC            | -1.673 | 0.161 | 5.27E-24 | 1.46E-21  | 1.37E+02 | - |

|                       |                              |         |       |          |           |          |   |
|-----------------------|------------------------------|---------|-------|----------|-----------|----------|---|
| Anus                  | Resin.THC                    | -1.383  | 0.145 | 3.66E-20 | 9.89E-18  | 1.52E+02 | - |
| Pancreas              | Resin.THC                    | -1.864  | 0.158 | 4.14E-30 | 1.18E-27  | 2.45E+02 | - |
| All Cancers           | Resin.THC                    | -1.104  | 0.136 | 4.26E-15 | 1.08E-12  | 3.03E+02 | - |
| Thyroid               | Resin.THC                    | -2.048  | 0.170 | 2.93E-30 | 8.42E-28  | 4.81E+02 | - |
| Kidney                | LM.Cannabis:Herb.THC         | -2.346  | 1.591 | 1.41E-01 | 1         | 7.55E+02 | - |
| All Cancers nNMSC     | LM.Cannabis:Herb.THC         | -0.929  | 1.215 | 4.45E-01 | 1         | 8.01E+02 | - |
| Leukaemia - Lymphoid  | Resin.THC                    | -0.689  | 0.507 | 1.76E-01 | 1         | 1.45E+03 | - |
| Ovary                 | Herb.THC                     | -5.348  | 7.675 | 4.86E-01 | 1         | 2.24E+03 | - |
| Oropharynx            | Tobacco:LM.Cannabis:Herb.THC | -1.181  | 0.220 | 6.24E-07 | 1.27E-04  | 3.72E+03 | - |
| Gallbladder & Biliary | Resin.THC                    | -2.662  | 0.193 | 7.75E-38 | 2.26E-35  | 1.14E+04 | - |
| Non-Hodgkins lymphoma | Herb.THC                     | -4.993  | 5.556 | 3.69E-01 | 1         | 1.81E+04 | - |
| Melanoma              | LM.Cannabis:Herb.THC         | -4.662  | 2.039 | 2.24E-02 | 1         | 2.15E+04 | - |
| Liver                 | Resin.THC                    | -4.048  | 0.189 | 1.37E-77 | 4.04E-75  | 5.18E+04 | - |
| Bladder               | LM.Cannabis:Herb.THC         | -4.604  | 1.607 | 4.27E-03 | 0.5765123 | 2.03E+05 | - |
| Larynx                | LM.Cannabis:Herb.THC         | -5.687  | 1.946 | 3.55E-03 | 0.4827118 | 2.58E+05 | - |
| Testis                | LM.Cannabis:Herb.THC         | -12.035 | 4.088 | 3.35E-03 | 0.4590646 | 3.48E+05 | - |
| All Cancers nNMSC     | Herb.THC                     | -1.880  | 3.436 | 5.84E-01 | 1         | 3.72E+05 | - |
| Liver                 | LM.Cannabis:Herb.THC         | -5.932  | 1.670 | 4.09E-04 | 0.0666225 | 5.87E+06 | - |
| Stomach               | LM.Cannabis:Herb.THC         | -10.569 | 2.823 | 1.92E-04 | 0.0324108 | 7.02E+06 | - |
| Oesophagus            | LM.Cannabis:Herb.THC         | -8.375  | 2.038 | 4.29E-05 | 0.0075983 | 3.06E+07 | - |
| Cervix                | Herb.THC                     | -20.218 | 9.466 | 3.29E-02 | 1         | 4.46E+09 | - |
| Anus                  | LM.Cannabis:Herb.THC         | -6.886  | 1.308 | 1.88E-07 | 3.95E-05  | 4.76E+09 | - |
| Breast                | LM.Cannabis:Herb.THC         | -15.227 | 2.728 | 3.10E-08 | 6.66E-06  | 1.39E+10 | - |
| Myeloma               | LM.Cannabis:Herb.THC         | -6.157  | 1.040 | 5.19E-09 | 1.16E-06  | 6.86E+10 | - |
| Hodgkins              | LM.Cannabis:Herb.THC         | -7.089  | 1.190 | 4.14E-09 | 9.33E-07  | 8.04E+10 | - |
| Brain                 | Herb.THC                     | -12.314 | 4.616 | 7.77E-03 | 0.9474173 | 9.48E+11 | - |
| Oropharynx            | LM.Cannabis                  | -4.690  | 0.836 | 2.23E-07 | 4.63E-05  | 1.93E+13 | - |
| Gallbladder & Biliary | LM.Cannabis:Herb.THC         | -9.674  | 1.355 | 2.69E-12 | 6.50E-10  | 9.00E+13 | - |
| All Cancers           | LM.Cannabis:Herb.THC         | -7.077  | 2.573 | 6.19E-03 | 0.7924609 | 1.92E+14 | - |
| Thyroid               | LM.Cannabis:Herb.THC         | -13.551 | 1.530 | 7.57E-18 | 2.01E-15  | 1.15E+16 | - |

|                  |                      |         |        |          |          |           |   |
|------------------|----------------------|---------|--------|----------|----------|-----------|---|
| Oropharynx_Broad | LM.Cannabis:Herb.THC | -15.619 | 17.713 | 3.78E-01 | 1        | 6.87E+16  | - |
| Colorectum       | LM.Cannabis:Herb.THC | -35.451 | 3.483  | 3.48E-23 | 9.61E-21 | 1.24E+18  | - |
| Kaposi           | Tobacco:LM.Cannabis  | -29.221 | 45.471 | 5.24E-01 | 1        | 6.49E+58  | - |
| Oropharynx       | Herb.THC             | -48.615 | 6.665  | 1.19E-10 | 2.79E-08 | 7.94E+134 | - |

Supplementary Table S32.: Significant Positive Terms from

## Interactive Panel Regression at Four Temporal Lags

| Cancer                | Term                 | $\beta$ -Estimate | Std. Error | P_Value  | P.Adj.Holm | Adj.P.FDR | E-Value Estimate | E-Value 95% Lower Bound |
|-----------------------|----------------------|-------------------|------------|----------|------------|-----------|------------------|-------------------------|
| Oropharynx            | LM.Cannabis:Herb.THC | 34.320            | 7.372      | 1.12E-05 | 2.13E-03   | 1.12E-05  | 2.11E+95         | 2.49E+55                |
| Colorectum            | Herb.THC             | 92.213            | 8.721      | 8.28E-25 | 2.31E-22   | 8.28E-25  | 3.79E+46         | 1.04E+38                |
| Gallbladder & Biliary | Herb.THC             | 29.693            | 3.555      | 4.60E-16 | 1.19E-13   | 4.60E-16  | 1.61E+42         | 2.47E+32                |
| Thyroid               | Herb.THC             | 33.741            | 4.103      | 1.03E-15 | 2.63E-13   | 1.03E-15  | 3.50E+39         | 1.62E+30                |
| Breast                | Herb.THC             | 51.744            | 6.784      | 5.76E-14 | 1.43E-11   | 5.76E-14  | 5.52E+33         | 1.47E+25                |
| Anus                  | Herb.THC             | 24.891            | 3.505      | 3.19E-12 | 7.62E-10   | 3.19E-12  | 1.56E+34         | 7.22E+24                |
| Oropharynx            | Resin.THC            | 9.947             | 1.105      | 3.68E-14 | 9.19E-12   | 3.68E-14  | 6.95E+27         | 7.23E+21                |
| Oesophagus            | Herb.THC             | 31.178            | 5.101      | 1.42E-09 | 3.25E-07   | 1.42E-09  | 1.12E+27         | 3.09E+18                |
| Myeloma               | Herb.THC             | 15.860            | 2.788      | 1.93E-08 | 4.18E-06   | 1.93E-08  | 2.76E+27         | 1.28E+18                |
| All Cancers           | Herb.THC             | 13.310            | 2.871      | 4.70E-06 | 9.20E-04   | 4.70E-06  | 3.99E+26         | 3.19E+15                |
| Melanoma              | Herb.THC             | 24.578            | 5.069      | 1.45E-06 | 2.91E-04   | 1.45E-06  | 3.61E+21         | 9.59E+12                |
| Liver                 | Herb.THC             | 19.895            | 4.541      | 1.38E-05 | 2.58E-03   | 1.38E-05  | 9.79E+21         | 2.02E+12                |
| Hodgkins              | Herb.THC             | 13.432            | 3.190      | 2.89E-05 | 5.29E-03   | 2.89E-05  | 2.48E+20         | 1.15E+11                |
| Testis                | Herb.THC             | 45.669            | 10.959     | 3.49E-05 | 6.28E-03   | 3.49E-05  | 1.53E+20         | 7.12E+10                |
| Oropharynx_Broad      | Herb.THC             | 21.554            | 7.876      | 6.52E-03 | 8.28E-01   | 6.52E-03  | 1.32E+23         | 6.45E+06                |
| Bladder               | Herb.THC             | 13.187            | 4.024      | 1.09E-03 | 1.68E-01   | 1.09E-03  | 4.41E+14         | 1.21E+06                |
| Oropharynx            | Tobacco:Herb.THC     | 1.120             | 0.180      | 1.69E-08 | 3.69E-06   | 1.69E-08  | 2.52E+03         | 2.65E+02                |
| Stomach               | Herb.THC             | 17.035            | 7.068      | 1.61E-02 | 1.00E+00   | 1.61E-02  | 7.08E+10         | 1.94E+02                |
| Oropharynx_Broad      | LM.Cannabis          | 6.254             | 2.287      | 6.55E-03 | 8.28E-01   | 6.55E-03  | 8.37E+06         | 1.53E+02                |
| Oesophagus            | Resin.THC            | 1.932             | 0.206      | 5.48E-20 | 1.47E-17   | 5.48E-20  | 9.03E+01         | 4.04E+01                |
| Colorectum            | LM.Cannabis          | 2.338             | 0.184      | 2.13E-34 | 6.15E-32   | 2.13E-34  | 2.93E+01         | 1.92E+01                |



|                       |                              |       |       |          |          |          |          |          |
|-----------------------|------------------------------|-------|-------|----------|----------|----------|----------|----------|
| Thyroid               | LM.Cannabis                  | 0.980 | 0.087 | 3.18E-27 | 9.00E-25 | 3.18E-27 | 2.71E+01 | 1.70E+01 |
| Myeloma               | Resin.THC                    | 0.719 | 0.116 | 9.36E-10 | 2.16E-07 | 9.36E-10 | 3.35E+01 | 1.34E+01 |
| Larynx                | Resin.THC                    | 1.162 | 0.197 | 5.11E-09 | 1.14E-06 | 5.11E-09 | 2.16E+01 | 9.45E+00 |
| Stomach               | LM.Cannabis                  | 1.329 | 0.149 | 2.34E-18 | 6.22E-16 | 2.34E-18 | 1.28E+01 | 8.25E+00 |
| Hodgkins              | LM.Cannabis                  | 0.553 | 0.067 | 1.24E-15 | 3.16E-13 | 1.24E-15 | 1.29E+01 | 7.99E+00 |
| Larynx                | LM.Cannabis                  | 0.868 | 0.103 | 1.04E-16 | 2.70E-14 | 1.04E-16 | 1.15E+01 | 7.42E+00 |
| Cervix                | LM.Cannabis:Herb.THC         | 8.526 | 3.781 | 2.44E-02 | 1.00E+00 | 2.44E-02 | 1.75E+04 | 6.12E+00 |
| Breast                | LM.Cannabis                  | 1.063 | 0.144 | 2.98E-13 | 7.31E-11 | 2.98E-13 | 9.20E+00 | 5.86E+00 |
| Thyroid               | Tobacco:LM.Cannabis:Herb.THC | 0.505 | 0.050 | 9.13E-23 | 2.50E-20 | 9.13E-23 | 7.19E+00 | 5.41E+00 |
| Colorectum            | Tobacco:LM.Cannabis:Herb.THC | 1.066 | 0.113 | 3.06E-20 | 8.30E-18 | 3.06E-20 | 6.31E+00 | 4.75E+00 |
| Gallbladder & Biliary | Tobacco:LM.Cannabis:Herb.THC | 0.312 | 0.044 | 2.95E-12 | 7.07E-10 | 2.95E-12 | 4.95E+00 | 3.59E+00 |
| Myeloma               | LM.Cannabis                  | 0.297 | 0.059 | 6.19E-07 | 1.26E-04 | 6.19E-07 | 5.89E+00 | 3.50E+00 |
| Oropharynx            | Tobacco:LM.Cannabis          | 0.157 | 0.024 | 6.02E-09 | 1.34E-06 | 6.02E-09 | 4.89E+00 | 3.43E+00 |
| Hodgkins              | Resin.THC                    | 0.459 | 0.132 | 5.58E-04 | 8.99E-02 | 5.58E-04 | 9.20E+00 | 3.40E+00 |
| Leukaemia - Myeloid   | Alcohol                      | 0.269 | 0.066 | 8.04E-05 | 1.40E-02 | 8.04E-05 | 6.31E+00 | 3.21E+00 |
| Hodgkins              | Tobacco:LM.Cannabis:Herb.THC | 0.236 | 0.038 | 1.52E-09 | 3.45E-07 | 1.52E-09 | 3.93E+00 | 2.87E+00 |
| Leukaemia - Lymphoid  | Alcohol                      | 0.119 | 0.032 | 2.61E-04 | 4.36E-02 | 2.61E-04 | 5.67E+00 | 2.84E+00 |
| Anus                  | Tobacco:LM.Cannabis:Herb.THC | 0.247 | 0.042 | 7.88E-09 | 1.73E-06 | 7.88E-09 | 3.77E+00 | 2.74E+00 |
| Colorectum            | Resin.THC                    | 1.124 | 0.352 | 1.47E-03 | 2.23E-01 | 1.47E-03 | 6.79E+00 | 2.69E+00 |
| Myeloma               | Tobacco:LM.Cannabis:Herb.THC | 0.190 | 0.034 | 2.58E-08 | 5.56E-06 | 2.58E-08 | 3.64E+00 | 2.64E+00 |
| Breast                | Tobacco:LM.Cannabis:Herb.THC | 0.494 | 0.089 | 3.60E-08 | 7.71E-06 | 3.60E-08 | 3.59E+00 | 2.60E+00 |
| Lung                  | Resin.THC                    | 0.350 | 0.116 | 2.49E-03 | 3.62E-01 | 2.49E-03 | 6.33E+00 | 2.47E+00 |
| All Cancers           | Tobacco:LM.Cannabis:Herb.THC | 0.253 | 0.081 | 1.92E-03 | 2.85E-01 | 1.92E-03 | 5.77E+00 | 2.44E+00 |
| Testis                | LM.Cannabis                  | 0.809 | 0.232 | 5.12E-04 | 8.30E-02 | 5.12E-04 | 3.93E+00 | 2.21E+00 |
| Gallbladder & Biliary | LM.Cannabis                  | 0.261 | 0.079 | 9.97E-04 | 1.57E-01 | 9.97E-04 | 4.09E+00 | 2.18E+00 |
| Liver                 | Tobacco:LM.Cannabis:Herb.THC | 0.230 | 0.054 | 2.17E-05 | 3.99E-03 | 2.17E-05 | 2.96E+00 | 2.08E+00 |
| Oesophagus            | Tobacco:LM.Cannabis:Herb.THC | 0.274 | 0.066 | 3.76E-05 | 6.70E-03 | 3.76E-05 | 2.83E+00 | 1.99E+00 |
| Gallbladder & Biliary | Tobacco                      | 0.102 | 0.008 | 4.70E-36 | 1.36E-33 | 4.70E-36 | 2.13E+00 | 1.99E+00 |
| Brain                 | Tobacco:Herb.THC             | 0.419 | 0.148 | 4.73E-03 | 6.34E-01 | 4.73E-03 | 4.43E+00 | 1.99E+00 |

|                  |                              |       |       |          |          |          |          |          |
|------------------|------------------------------|-------|-------|----------|----------|----------|----------|----------|
| Testis           | Income                       | 0.520 | 0.133 | 1.05E-04 | 1.81E-02 | 1.05E-04 | 2.76E+00 | 1.92E+00 |
| Corpus Uteri     | LM.Cannabis                  | 0.587 | 0.198 | 3.14E-03 | 4.40E-01 | 3.14E-03 | 3.16E+00 | 1.78E+00 |
| Larynx           | Alcohol                      | 0.128 | 0.015 | 1.22E-17 | 3.22E-15 | 1.22E-17 | 1.93E+00 | 1.76E+00 |
| Cervix           | Tobacco:Herb.THC             | 0.785 | 0.304 | 9.85E-03 | 1.00E+00 | 9.85E-03 | 4.04E+00 | 1.75E+00 |
| Brain            | Income                       | 0.161 | 0.041 | 8.51E-05 | 1.47E-02 | 8.51E-05 | 2.19E+00 | 1.67E+00 |
| All Cancers      | Alcohol                      | 0.061 | 0.013 | 5.80E-06 | 1.13E-03 | 5.80E-06 | 1.96E+00 | 1.62E+00 |
| Breast           | Income                       | 0.218 | 0.060 | 2.97E-04 | 4.89E-02 | 2.97E-04 | 2.11E+00 | 1.59E+00 |
| Stomach          | Tobacco:LM.Cannabis:Herb.THC | 0.283 | 0.092 | 2.06E-03 | 3.03E-01 | 2.06E-03 | 2.36E+00 | 1.59E+00 |
| Colorectum       | Tobacco                      | 0.147 | 0.012 | 8.63E-31 | 2.49E-28 | 8.63E-31 | 1.65E+00 | 1.57E+00 |
| Testis           | Tobacco:LM.Cannabis:Herb.THC | 0.396 | 0.132 | 2.84E-03 | 4.05E-01 | 2.84E-03 | 2.34E+00 | 1.56E+00 |
| Breast           | Tobacco                      | 0.097 | 0.010 | 4.73E-23 | 1.30E-20 | 4.73E-23 | 1.58E+00 | 1.50E+00 |
| Melanoma         | Tobacco:LM.Cannabis:Herb.THC | 0.185 | 0.066 | 5.49E-03 | 7.19E-01 | 5.49E-03 | 2.25E+00 | 1.47E+00 |
| Stomach          | Tobacco                      | 0.078 | 0.010 | 1.61E-14 | 4.04E-12 | 1.61E-14 | 1.48E+00 | 1.39E+00 |
| Oropharynx Broad | Tobacco                      | 0.098 | 0.036 | 5.89E-03 | 7.60E-01 | 5.89E-03 | 1.86E+00 | 1.35E+00 |
| Colorectum       | Alcohol                      | 0.109 | 0.026 | 3.19E-05 | 5.81E-03 | 3.19E-05 | 1.53E+00 | 1.34E+00 |
| Prostate         | Income                       | 0.232 | 0.087 | 7.59E-03 | 9.33E-01 | 7.59E-03 | 1.85E+00 | 1.33E+00 |
| Testis           | Tobacco                      | 0.087 | 0.018 | 9.88E-07 | 1.99E-04 | 9.88E-07 | 1.41E+00 | 1.29E+00 |
| Myeloma          | Income                       | 0.079 | 0.034 | 1.98E-02 | 1.00E+00 | 1.98E-02 | 2.07E+00 | 1.29E+00 |
| Hodgkins         | Alcohol                      | 0.035 | 0.011 | 1.02E-03 | 1.59E-01 | 1.02E-03 | 1.51E+00 | 1.28E+00 |
| All Cancers nMSC | Tobacco:LM.Cannabis          | 0.012 | 0.002 | 7.07E-07 | 1.43E-04 | 7.07E-07 | 1.37E+00 | 1.27E+00 |
| Corpus Uteri     | Tobacco                      | 0.069 | 0.013 | 3.00E-07 | 6.21E-05 | 3.00E-07 | 1.36E+00 | 1.27E+00 |
| Larynx           | Tobacco:LM.Cannabis:Herb.THC | 0.146 | 0.063 | 2.14E-02 | 1.00E+00 | 2.14E-02 | 2.04E+00 | 1.27E+00 |
| Thyroid          | Alcohol                      | 0.042 | 0.014 | 2.57E-03 | 3.70E-01 | 2.57E-03 | 1.48E+00 | 1.24E+00 |
| Stomach          | Alcohol                      | 0.068 | 0.021 | 1.39E-03 | 2.11E-01 | 1.39E-03 | 1.44E+00 | 1.24E+00 |
| Prostate         | Tobacco                      | 0.061 | 0.014 | 1.14E-05 | 2.16E-03 | 1.14E-05 | 1.33E+00 | 1.23E+00 |
| Ovary            | Tobacco                      | 0.047 | 0.011 | 2.03E-05 | 3.75E-03 | 2.03E-05 | 1.32E+00 | 1.22E+00 |
| Pancreas         | Tobacco:LM.Cannabis          | 0.016 | 0.003 | 1.32E-09 | 3.01E-07 | 1.32E-09 | 1.26E+00 | 1.20E+00 |
| Lung             | Tobacco:LM.Cannabis          | 0.011 | 0.002 | 6.83E-09 | 1.51E-06 | 6.83E-09 | 1.25E+00 | 1.19E+00 |
| Oesophagus       | Alcohol                      | 0.043 | 0.015 | 4.75E-03 | 6.34E-01 | 4.75E-03 | 1.40E+00 | 1.19E+00 |

|                       |                              |       |       |          |          |          |          |          |
|-----------------------|------------------------------|-------|-------|----------|----------|----------|----------|----------|
| All Cancers nMSC      | Tobacco:Herb.THC             | 0.213 | 0.107 | 4.65E-02 | 1.00E+00 | 4.65E-02 | 7.37E+00 | 1.19E+00 |
| Kidney                | Tobacco:LM.Cannabis          | 0.014 | 0.003 | 2.20E-07 | 4.60E-05 | 2.20E-07 | 1.23E+00 | 1.18E+00 |
| Breast                | Alcohol                      | 0.055 | 0.020 | 7.36E-03 | 9.13E-01 | 7.36E-03 | 1.39E+00 | 1.17E+00 |
| Bladder               | Tobacco                      | 0.020 | 0.006 | 6.23E-04 | 9.97E-02 | 6.23E-04 | 1.28E+00 | 1.17E+00 |
| Melanoma              | Tobacco:LM.Cannabis          | 0.016 | 0.003 | 5.53E-06 | 1.08E-03 | 5.53E-06 | 1.21E+00 | 1.15E+00 |
| Liver                 | Tobacco:LM.Cannabis          | 0.012 | 0.003 | 3.71E-05 | 6.63E-03 | 3.71E-05 | 1.21E+00 | 1.15E+00 |
| Larynx                | Tobacco                      | 0.020 | 0.007 | 3.22E-03 | 4.47E-01 | 3.22E-03 | 1.25E+00 | 1.13E+00 |
| Thyroid               | Tobacco                      | 0.018 | 0.007 | 7.95E-03 | 9.62E-01 | 7.95E-03 | 1.27E+00 | 1.13E+00 |
| Oesophagus            | Tobacco:LM.Cannabis          | 0.011 | 0.003 | 1.81E-03 | 2.72E-01 | 1.81E-03 | 1.17E+00 | 1.10E+00 |
| Non-Hodgkins lymphoma | Tobacco:LM.Cannabis          | 0.012 | 0.004 | 2.83E-03 | 4.05E-01 | 2.83E-03 | 1.17E+00 | 1.09E+00 |
| Kidney                | Tobacco:LM.Cannabis:Herb.THC | 0.102 | 0.052 | 4.97E-02 | 1.00E+00 | 4.97E-02 | 1.91E+00 | 1.04E+00 |

Supplementary Table S33.: Summary of Significant Positive Terms from  
Interactive Panel Regression at Four Temporal Lags

| Term                         | Count | Negative Total<br>of P-Value<br>Exponents | Mean of the<br>Negative P-<br>Value<br>Exponents | Median of the<br>Negative P-<br>Value<br>Exponents | Total of the<br>Lower E-Value<br>Exponents | Mean of the<br>Lower E-Value<br>Exponents | Median of the<br>Lower E-Value<br>Exponents |
|------------------------------|-------|-------------------------------------------|--------------------------------------------------|----------------------------------------------------|--------------------------------------------|-------------------------------------------|---------------------------------------------|
| Herb.THC                     | 15    | 119                                       | 7.93                                             | 5                                                  | 259                                        | 17.27                                     | 15                                          |
| LM.Cannabis : Herb.THC       | 2     | 5                                         | 2.50                                             | 2.5                                                | 55                                         | 27.50                                     | 27.5                                        |
| Resin.THC                    | 7     | 56                                        | 8                                                | 8.00                                               | 23                                         | 3.29                                      | 0                                           |
| Last.Month.Cannabis          | 11    | 133                                       | 12.09                                            | 12                                                 | 4                                          | 0.36                                      | 0                                           |
| Tobacco:Herb.THC             | 4     | 12                                        | 3                                                | 2                                                  | 2                                          | 0.5                                       | 0                                           |
| Alcohol                      | 10    | 42                                        | 4.2                                              | 2.5                                                | 0                                          | 0                                         | 0                                           |
| Income                       | 5     | 13                                        | 2.60                                             | 3                                                  | 0                                          | 0                                         | 0                                           |
| Tobacco                      | 12    | 130                                       | 10.83                                            | 5                                                  | 0                                          | 0                                         | 0                                           |
| Tobacco:LM.Cannabis          | 9     | 49                                        | 5.44                                             | 6                                                  | 0                                          | 0                                         | 0                                           |
| Tobacco:LM.Cannabis:Herb.THC | 15    | 100                                       | 6.67                                             | 4                                                  | 0                                          | 0                                         | 0                                           |

Supplementary Table S34.: Complete Model Output from  
Interactive Panel Regression at Six Temporal Lags

| Cancer                | Term                 | $\beta$ -Estimate | Std. Error | P-Value  | E-Value Estimate | 95% Lower Bound of the E-Value |
|-----------------------|----------------------|-------------------|------------|----------|------------------|--------------------------------|
| Thyroid               | Herb.THC             | 42.032            | 5.452      | 7.28E-14 | 3.50E+48         | 2.01E+36                       |
| Anus                  | Herb.THC             | 33.645            | 4.821      | 9.88E-12 | 9.40E+43         | 5.41E+31                       |
| Colorectum            | Herb.THC             | 89.627            | 11.695     | 5.57E-14 | 2.28E+42         | 4.21E+31                       |
| Oropharynx            | LM.Cannabis:Herb.THC | 26.474            | 9.156      | 5.01E-03 | 2.87E+74         | 1.97E+24                       |
| Melanoma              | Herb.THC             | 35.988            | 6.202      | 9.69E-09 | 1.67E+32         | 2.90E+21                       |
| Gallbladder & Biliary | Herb.THC             | 25.697            | 5.031      | 4.92E-07 | 1.31E+34         | 1.47E+21                       |
| Breast                | Herb.THC             | 49.072            | 9.167      | 1.15E-07 | 5.63E+29         | 9.77E+18                       |
| Oropharynx            | Resin.THC            | 8.136             | 1.419      | 1.95E-07 | 1.23E+23         | 2.07E+15                       |
| All Cancers nNMSC     | Herb.THC             | 12.447            | 4.357      | 4.42E-03 | 8.78E+39         | 6.30E+12                       |
| Oropharynx_Broad      | Herb.THC             | 28.761            | 9.112      | 1.75E-03 | 3.89E+32         | 3.81E+12                       |
| Oropharynx_Broad      | LM.Cannabis          | 15.402            | 3.351      | 6.26E-06 | 3.91E+17         | 1.71E+10                       |
| Testis                | Herb.THC             | 52.101            | 15.980     | 1.19E-03 | 5.05E+20         | 2.91E+08                       |
| Oesophagus            | Herb.THC             | 21.875            | 6.577      | 9.24E-04 | 3.58E+18         | 6.60E+07                       |
| Myeloma               | Herb.THC             | 10.996            | 3.763      | 3.64E-03 | 3.85E+18         | 2.22E+06                       |
| Cervix                | LM.Cannabis:Herb.THC | 17.937            | 4.974      | 3.32E-04 | 1.51E+08         | 8.04E+03                       |
| Hodgkins              | Herb.THC             | 10.998            | 4.384      | 1.24E-02 | 9.99E+15         | 5.75E+03                       |
| Bladder               | Herb.THC             | 13.125            | 5.195      | 1.17E-02 | 1.46E+14         | 2.70E+03                       |
| Oropharynx            | Tobacco:Herb.THC     | 1.255             | 0.222      | 2.66E-07 | 6.55E+03         | 3.98E+02                       |
| Brain                 | LM.Cannabis:Herb.THC | 6.950             | 2.367      | 3.43E-03 | 5.19E+06         | 2.76E+02                       |
| Thyroid               | LM.Cannabis          | 1.312             | 0.121      | 1.25E-24 | 6.36E+01         | 3.38E+01                       |
| Oesophagus            | Resin.THC            | 1.944             | 0.250      | 2.30E-14 | 8.32E+01         | 3.23E+01                       |

|                      |                              |       |       |          |          |          |
|----------------------|------------------------------|-------|-------|----------|----------|----------|
| Colorectum           | LM.Cannabis                  | 2.454 | 0.250 | 1.85E-21 | 2.78E+01 | 1.62E+01 |
| Myeloma              | Resin.THC                    | 0.779 | 0.146 | 1.55E-07 | 3.90E+01 | 1.27E+01 |
| Larynx               | LM.Cannabis                  | 1.046 | 0.137 | 5.66E-14 | 1.53E+01 | 8.82E+00 |
| Thyroid              | Tobacco:LM.Cannabis:Herb.THC | 0.668 | 0.066 | 6.12E-22 | 1.12E+01 | 7.78E+00 |
| Larynx               | Resin.THC                    | 1.139 | 0.242 | 3.07E-06 | 1.86E+01 | 6.92E+00 |
| Pancreas             | LM.Cannabis:Herb.THC         | 4.265 | 1.953 | 2.93E-02 | 1.18E+05 | 5.73E+00 |
| Breast               | LM.Cannabis                  | 1.157 | 0.197 | 6.93E-09 | 9.36E+00 | 5.25E+00 |
| Hodgkins             | LM.Cannabis                  | 0.514 | 0.097 | 1.97E-07 | 1.03E+01 | 5.24E+00 |
| Colorectum           | Tobacco:LM.Cannabis:Herb.THC | 1.150 | 0.155 | 3.59E-13 | 6.39E+00 | 4.43E+00 |
| Cervix               | Tobacco:Herb.THC             | 1.692 | 0.407 | 3.64E-05 | 1.05E+01 | 4.38E+00 |
| Ovary                | LM.Cannabis:Herb.THC         | 8.697 | 4.082 | 3.34E-02 | 9.04E+04 | 4.25E+00 |
| Stomach              | LM.Cannabis                  | 0.980 | 0.196 | 6.90E-07 | 7.20E+00 | 3.99E+00 |
| Anus                 | Tobacco:LM.Cannabis:Herb.THC | 0.348 | 0.058 | 4.81E-09 | 5.11E+00 | 3.44E+00 |
| Brain                | Tobacco:Herb.THC             | 0.708 | 0.194 | 2.76E-04 | 8.48E+00 | 3.44E+00 |
| Lung                 | Resin.THC                    | 0.445 | 0.135 | 1.06E-03 | 9.15E+00 | 3.20E+00 |
| Ovary                | Tobacco:Herb.THC             | 1.123 | 0.334 | 8.13E-04 | 7.45E+00 | 2.97E+00 |
| Oropharynx_Broad     | Tobacco:LM.Cannabis:Herb.THC | 1.495 | 0.655 | 2.30E-02 | 9.49E+01 | 2.88E+00 |
| Lung                 | Tobacco:Herb.THC             | 0.381 | 0.116 | 1.09E-03 | 7.18E+00 | 2.84E+00 |
| All Cancers nNMSC    | Tobacco:LM.Cannabis:Herb.THC | 0.182 | 0.055 | 1.02E-03 | 7.06E+00 | 2.84E+00 |
| Hodgkins             | Resin.THC                    | 0.498 | 0.170 | 3.67E-03 | 9.74E+00 | 2.82E+00 |
| Oropharynx_Broad     | Alcohol                      | 0.499 | 0.149 | 9.17E-04 | 6.72E+00 | 2.81E+00 |
| Oropharynx           | Tobacco:LM.Cannabis          | 0.133 | 0.031 | 6.84E-05 | 4.14E+00 | 2.54E+00 |
| Myeloma              | LM.Cannabis                  | 0.280 | 0.084 | 8.81E-04 | 5.29E+00 | 2.50E+00 |
| Leukaemia - Lymphoid | Alcohol                      | 0.125 | 0.041 | 2.71E-03 | 6.20E+00 | 2.49E+00 |
| Leukaemia - Myeloid  | Alcohol                      | 0.262 | 0.086 | 2.86E-03 | 6.15E+00 | 2.46E+00 |
| Kidney               | Tobacco:Herb.THC             | 0.490 | 0.164 | 2.89E-03 | 6.30E+00 | 2.43E+00 |
| Breast               | Tobacco:LM.Cannabis:Herb.THC | 0.538 | 0.124 | 1.51E-05 | 3.63E+00 | 2.38E+00 |
| Hodgkins             | Tobacco:LM.Cannabis:Herb.THC | 0.228 | 0.053 | 2.19E-05 | 3.65E+00 | 2.37E+00 |
| Pancreas             | Tobacco:Herb.THC             | 0.456 | 0.160 | 4.50E-03 | 5.92E+00 | 2.25E+00 |
| Myeloma              | Tobacco:LM.Cannabis:Herb.THC | 0.185 | 0.046 | 6.03E-05 | 3.47E+00 | 2.24E+00 |

|                       |                              |       |       |          |          |          |
|-----------------------|------------------------------|-------|-------|----------|----------|----------|
| Gallbladder & Biliary | Tobacco:LM.Cannabis:Herb.THC | 0.238 | 0.065 | 2.67E-04 | 3.53E+00 | 2.15E+00 |
| Testis                | LM.Cannabis                  | 1.066 | 0.355 | 2.81E-03 | 4.67E+00 | 2.14E+00 |
| Gallbladder & Biliary | Tobacco                      | 0.098 | 0.011 | 1.14E-17 | 2.03E+00 | 1.84E+00 |
| Larynx                | Alcohol                      | 0.148 | 0.019 | 7.76E-15 | 2.01E+00 | 1.80E+00 |
| Testis                | Income                       | 0.597 | 0.183 | 1.16E-03 | 2.82E+00 | 1.79E+00 |
| Stomach               | Tobacco:Herb.THC             | 0.737 | 0.298 | 1.37E-02 | 4.98E+00 | 1.78E+00 |
| Oropharynx_Broad      | Tobacco                      | 0.166 | 0.044 | 2.23E-04 | 2.44E+00 | 1.75E+00 |
| All Cancers           | Tobacco:LM.Cannabis:Herb.THC | 0.253 | 0.107 | 1.85E-02 | 5.92E+00 | 1.75E+00 |
| Colorectum            | Resin.THC                    | 1.055 | 0.444 | 1.77E-02 | 5.70E+00 | 1.75E+00 |
| Larynx                | Tobacco:LM.Cannabis:Herb.THC | 0.257 | 0.085 | 2.55E-03 | 2.71E+00 | 1.68E+00 |
| Melanoma              | Tobacco:LM.Cannabis:Herb.THC | 0.233 | 0.084 | 5.53E-03 | 2.60E+00 | 1.57E+00 |
| Colorectum            | Tobacco                      | 0.157 | 0.017 | 1.40E-18 | 1.65E+00 | 1.54E+00 |
| Oesophagus            | Tobacco:LM.Cannabis:Herb.THC | 0.236 | 0.087 | 7.05E-03 | 2.52E+00 | 1.52E+00 |
| Testis                | Tobacco:LM.Cannabis:Herb.THC | 0.504 | 0.194 | 9.60E-03 | 2.53E+00 | 1.48E+00 |
| Breast                | Income                       | 0.225 | 0.075 | 2.64E-03 | 2.07E+00 | 1.47E+00 |
| Breast                | Tobacco                      | 0.102 | 0.014 | 1.83E-13 | 1.57E+00 | 1.46E+00 |
| Thyroid               | Alcohol                      | 0.074 | 0.018 | 3.88E-05 | 1.73E+00 | 1.46E+00 |
| Oropharynx_Broad      | Income                       | 0.184 | 0.074 | 1.34E-02 | 2.60E+00 | 1.45E+00 |
| All Cancers           | Alcohol                      | 0.048 | 0.015 | 2.12E-03 | 1.80E+00 | 1.39E+00 |
| Bladder               | Resin.THC                    | 0.414 | 0.197 | 3.61E-02 | 4.92E+00 | 1.35E+00 |
| All Cancers nNMSC     | Tobacco                      | 0.021 | 0.006 | 9.66E-04 | 1.60E+00 | 1.33E+00 |
| Thyroid               | Tobacco                      | 0.036 | 0.009 | 9.34E-05 | 1.43E+00 | 1.27E+00 |
| Testis                | Tobacco                      | 0.104 | 0.027 | 1.12E-04 | 1.43E+00 | 1.27E+00 |
| Pancreas              | Tobacco:LM.Cannabis          | 0.025 | 0.003 | 2.58E-12 | 1.33E+00 | 1.27E+00 |
| Colorectum            | Alcohol                      | 0.102 | 0.034 | 2.74E-03 | 1.48E+00 | 1.24E+00 |
| Kidney                | Tobacco:LM.Cannabis          | 0.021 | 0.004 | 2.92E-09 | 1.30E+00 | 1.23E+00 |
| Lung                  | Tobacco:LM.Cannabis          | 0.015 | 0.003 | 4.98E-09 | 1.29E+00 | 1.23E+00 |
| Stomach               | Tobacco                      | 0.050 | 0.014 | 2.47E-04 | 1.35E+00 | 1.22E+00 |
| Bladder               | Tobacco                      | 0.028 | 0.008 | 2.71E-04 | 1.35E+00 | 1.22E+00 |
| Hodgkins              | Alcohol                      | 0.037 | 0.014 | 1.01E-02 | 1.51E+00 | 1.21E+00 |

|                       |                              |       |       |          |          |          |
|-----------------------|------------------------------|-------|-------|----------|----------|----------|
| Liver                 | Tobacco:LM.Cannabis:Herb.THC | 0.159 | 0.075 | 3.46E-02 | 2.28E+00 | 1.20E+00 |
| Liver                 | Tobacco:LM.Cannabis          | 0.018 | 0.004 | 5.02E-05 | 1.26E+00 | 1.17E+00 |
| Melanoma              | Tobacco                      | 0.028 | 0.009 | 2.12E-03 | 1.31E+00 | 1.17E+00 |
| Prostate              | Tobacco:Herb.THC             | 0.858 | 0.430 | 4.61E-02 | 3.98E+00 | 1.15E+00 |
| Larynx                | Tobacco                      | 0.027 | 0.009 | 4.25E-03 | 1.30E+00 | 1.15E+00 |
| Anus                  | Tobacco                      | 0.020 | 0.008 | 1.14E-02 | 1.32E+00 | 1.13E+00 |
| Corpus Uteri          | Tobacco                      | 0.050 | 0.019 | 8.37E-03 | 1.28E+00 | 1.13E+00 |
| Brain                 | Tobacco:LM.Cannabis          | 0.014 | 0.004 | 1.02E-03 | 1.20E+00 | 1.12E+00 |
| Melanoma              | Tobacco:LM.Cannabis          | 0.014 | 0.004 | 1.60E-03 | 1.20E+00 | 1.12E+00 |
| Brain                 | Income                       | 0.099 | 0.048 | 3.99E-02 | 1.77E+00 | 1.11E+00 |
| Oesophagus            | Tobacco:LM.Cannabis          | 0.014 | 0.005 | 2.96E-03 | 1.19E+00 | 1.11E+00 |
| Non-Hodgkins lymphoma | Tobacco:LM.Cannabis          | 0.015 | 0.005 | 3.83E-03 | 1.19E+00 | 1.10E+00 |
| Cervix                | Tobacco:LM.Cannabis          | 0.022 | 0.009 | 1.08E-02 | 1.18E+00 | 1.08E+00 |
| Stomach               | Alcohol                      | 0.055 | 0.027 | 4.06E-02 | 1.37E+00 | 1.06E+00 |
| Prostate              | Tobacco                      | 0.040 | 0.020 | 4.05E-02 | 1.24E+00 | 1.04E+00 |
| Prostate              | Tobacco:LM.Cannabis          | 0.002 | 0.009 | 8.33E-01 | 1.05E+00 | 1.00E+00 |
| Prostate              | Alcohol                      | 0.003 | 0.038 | 9.28E-01 | 1.06E+00 | 1.00E+00 |
| Ovary                 | Tobacco:LM.Cannabis          | 0.007 | 0.007 | 3.50E-01 | 1.10E+00 | 1.00E+00 |
| Hodgkins              | Tobacco                      | 0.003 | 0.007 | 6.99E-01 | 1.11E+00 | 1.00E+00 |
| Stomach               | Tobacco:LM.Cannabis:Herb.THC | 0.010 | 0.122 | 9.32E-01 | 1.14E+00 | 1.00E+00 |
| Cervix                | Alcohol                      | 0.020 | 0.036 | 5.83E-01 | 1.16E+00 | 1.00E+00 |
| Ovary                 | Tobacco                      | 0.025 | 0.015 | 1.02E-01 | 1.21E+00 | 1.00E+00 |
| Non-Hodgkins lymphoma | Tobacco:LM.Cannabis:Herb.THC | 0.019 | 0.104 | 8.54E-01 | 1.22E+00 | 1.00E+00 |
| Myeloma               | Alcohol                      | 0.010 | 0.012 | 4.09E-01 | 1.24E+00 | 1.00E+00 |
| Myeloma               | Income                       | 0.012 | 0.043 | 7.83E-01 | 1.27E+00 | 1.00E+00 |
| Bladder               | Tobacco:LM.Cannabis:Herb.THC | 0.020 | 0.069 | 7.72E-01 | 1.28E+00 | 1.00E+00 |
| Testis                | Alcohol                      | 0.059 | 0.052 | 2.62E-01 | 1.29E+00 | 1.00E+00 |
| Oesophagus            | Alcohol                      | 0.028 | 0.019 | 1.48E-01 | 1.30E+00 | 1.00E+00 |
| Breast                | Alcohol                      | 0.050 | 0.027 | 6.29E-02 | 1.35E+00 | 1.00E+00 |
| Anus                  | LM.Cannabis                  | 0.035 | 0.107 | 7.44E-01 | 1.46E+00 | 1.00E+00 |



|                       |                              |        |         |          |          |          |
|-----------------------|------------------------------|--------|---------|----------|----------|----------|
| Prostate              | Income                       | 0.111  | 0.107   | 3.00E-01 | 1.47E+00 | 1.00E+00 |
| Bladder               | LM.Cannabis                  | 0.059  | 0.111   | 5.93E-01 | 1.58E+00 | 1.00E+00 |
| All Cancers nNMSC     | LM.Cannabis                  | 0.027  | 0.108   | 8.05E-01 | 1.73E+00 | 1.00E+00 |
| Corpus Uteri          | LM.Cannabis                  | 0.257  | 0.271   | 3.43E-01 | 1.91E+00 | 1.00E+00 |
| Leukaemia - Lymphoid  | Tobacco:Herb.THC             | 0.040  | 0.136   | 7.67E-01 | 2.32E+00 | 1.00E+00 |
| Leukaemia - Myeloid   | Tobacco:LM.Cannabis:Herb.THC | 0.090  | 0.280   | 7.50E-01 | 2.39E+00 | 1.00E+00 |
| Leukaemia - Lymphoid  | LM.Cannabis                  | 0.047  | 0.550   | 9.32E-01 | 2.54E+00 | 1.00E+00 |
| Non-Hodgkins lymphoma | Resin.THC                    | 0.317  | 0.289   | 2.73E-01 | 2.85E+00 | 1.00E+00 |
| Gallbladder & Biliary | LM.Cannabis                  | 0.188  | 0.121   | 1.21E-01 | 2.94E+00 | 1.00E+00 |
| Non-Hodgkins lymphoma | Tobacco:Herb.THC             | 0.390  | 0.242   | 1.08E-01 | 3.33E+00 | 1.00E+00 |
| Corpus Uteri          | Tobacco:Herb.THC             | 0.702  | 0.413   | 8.94E-02 | 3.44E+00 | 1.00E+00 |
| Leukaemia - Myeloid   | Income                       | 0.303  | 0.382   | 4.29E-01 | 7.56E+00 | 1.00E+00 |
| All Cancers nNMSC     | Resin.THC                    | 0.210  | 0.153   | 1.72E-01 | 8.79E+00 | 1.00E+00 |
| All Cancers           | LM.Cannabis                  | 0.365  | 0.389   | 3.48E-01 | 1.04E+01 | 1.00E+00 |
| Leukaemia - Myeloid   | LM.Cannabis                  | 0.800  | 1.165   | 4.94E-01 | 7.91E+01 | 1.00E+00 |
| Corpus Uteri          | LM.Cannabis:Herb.THC         | 3.697  | 5.041   | 4.64E-01 | 7.95E+01 | 1.00E+00 |
| Prostate              | LM.Cannabis:Herb.THC         | 4.989  | 5.248   | 3.42E-01 | 2.38E+02 | 1.00E+00 |
| Oropharynx_Broad      | Resin.THC                    | 2.208  | 1.269   | 8.29E-02 | 6.02E+02 | 1.00E+00 |
| Kidney                | LM.Cannabis:Herb.THC         | 2.510  | 2.004   | 2.11E-01 | 1.09E+03 | 1.00E+00 |
| Lung                  | LM.Cannabis:Herb.THC         | 1.929  | 1.421   | 1.75E-01 | 1.85E+03 | 1.00E+00 |
| Leukaemia - Myeloid   | Herb.THC                     | 2.045  | 9.817   | 8.35E-01 | 2.47E+04 | 1.00E+00 |
| Kaposi                | Tobacco:LM.Cannabis          | 3.268  | 101.245 | 9.74E-01 | 3.80E+07 | 1.00E+00 |
| Larynx                | Herb.THC                     | 11.854 | 6.383   | 6.37E-02 | 3.11E+10 | 1.00E+00 |
| All Cancers           | Herb.THC                     | 5.948  | 3.590   | 9.84E-02 | 1.97E+12 | 1.00E+00 |
| Liver                 | Herb.THC                     | 11.759 | 6.311   | 6.30E-02 | 3.00E+12 | 1.00E+00 |
| Leukaemia - Lymphoid  | LM.Cannabis:Herb.THC         | 4.085  | 4.542   | 3.71E-01 | 3.98E+17 | 1.00E+00 |
| Bladder               | Tobacco:LM.Cannabis          | 0.000  | 0.004   | 9.04E-01 | 1.03E+00 | -        |
| All Cancers nNMSC     | Tobacco:LM.Cannabis          | -0.001 | 0.003   | 8.73E-01 | 1.07E+00 | -        |
| Anus                  | Tobacco:LM.Cannabis          | -0.002 | 0.003   | 5.81E-01 | 1.08E+00 | -        |
| Brain                 | Tobacco                      | -0.004 | 0.009   | 6.77E-01 | 1.10E+00 | -        |

|                       |                     |        |       |          |          |   |
|-----------------------|---------------------|--------|-------|----------|----------|---|
| Corpus Uteri          | Tobacco:LM.Cannabis | -0.009 | 0.009 | 2.93E-01 | 1.11E+00 | - |
| Leukaemia - Lymphoid  | Tobacco:LM.Cannabis | -0.002 | 0.016 | 9.20E-01 | 1.14E+00 | - |
| Hodgkins              | Income              | -0.006 | 0.050 | 9.04E-01 | 1.16E+00 | - |
| Leukaemia - Lymphoid  | Tobacco             | -0.002 | 0.013 | 8.72E-01 | 1.17E+00 | - |
| Oesophagus            | Tobacco             | -0.013 | 0.010 | 1.88E-01 | 1.19E+00 | - |
| Myeloma               | Tobacco:LM.Cannabis | -0.007 | 0.003 | 1.05E-02 | 1.19E+00 | - |
| Corpus Uteri          | Alcohol             | -0.027 | 0.037 | 4.64E-01 | 1.19E+00 | - |
| All Cancers           | Tobacco             | -0.006 | 0.006 | 2.57E-01 | 1.21E+00 | - |
| Testis                | Tobacco:LM.Cannabis | -0.035 | 0.011 | 2.34E-03 | 1.21E+00 | - |
| Gallbladder & Biliary | Tobacco:LM.Cannabis | -0.011 | 0.004 | 3.71E-03 | 1.22E+00 | - |
| Leukaemia - Myeloid   | Tobacco             | -0.008 | 0.028 | 7.83E-01 | 1.23E+00 | - |
| Cervix                | Tobacco             | -0.035 | 0.019 | 5.92E-02 | 1.23E+00 | - |
| Kidney                | Tobacco             | -0.015 | 0.007 | 5.09E-02 | 1.23E+00 | - |
| Thyroid               | Income              | -0.014 | 0.062 | 8.22E-01 | 1.24E+00 | - |
| Pancreas              | Tobacco             | -0.015 | 0.007 | 4.29E-02 | 1.24E+00 | - |
| Myeloma               | Tobacco             | -0.010 | 0.006 | 1.10E-01 | 1.24E+00 | - |
| Stomach               | Tobacco:LM.Cannabis | -0.031 | 0.006 | 2.11E-06 | 1.26E+00 | - |
| Hodgkins              | Tobacco:LM.Cannabis | -0.015 | 0.003 | 2.99E-06 | 1.28E+00 | - |
| Breast                | Tobacco:LM.Cannabis | -0.036 | 0.006 | 2.69E-08 | 1.28E+00 | - |
| Gallbladder & Biliary | Income              | -0.018 | 0.057 | 7.54E-01 | 1.30E+00 | - |
| Larynx                | Tobacco:LM.Cannabis | -0.029 | 0.004 | 1.89E-10 | 1.31E+00 | - |
| Lung                  | Tobacco             | -0.017 | 0.005 | 1.42E-03 | 1.32E+00 | - |
| All Cancers           | Tobacco:LM.Cannabis | -0.014 | 0.012 | 2.34E-01 | 1.34E+00 | - |
| Colorectum            | Tobacco:LM.Cannabis | -0.073 | 0.008 | 3.47E-18 | 1.38E+00 | - |
| Ovary                 | Alcohol             | -0.068 | 0.030 | 2.31E-02 | 1.40E+00 | - |
| Non-Hodgkins lymphoma | Tobacco             | -0.050 | 0.011 | 7.23E-06 | 1.40E+00 | - |
| Liver                 | Tobacco             | -0.039 | 0.010 | 1.67E-04 | 1.42E+00 | - |
| Prostate              | LM.Cannabis         | -0.104 | 0.282 | 7.13E-01 | 1.44E+00 | - |
| Corpus Uteri          | Income              | -0.104 | 0.103 | 3.10E-01 | 1.46E+00 | - |
| Thyroid               | Tobacco:LM.Cannabis | -0.040 | 0.004 | 9.06E-23 | 1.47E+00 | - |

|                       |                              |        |       |          |          |   |
|-----------------------|------------------------------|--------|-------|----------|----------|---|
| Leukaemia - Myeloid   | Tobacco:LM.Cannabis          | -0.028 | 0.034 | 4.10E-01 | 1.54E+00 | - |
| Anus                  | Alcohol                      | -0.044 | 0.016 | 5.65E-03 | 1.54E+00 | - |
| Non-Hodgkins lymphoma | Alcohol                      | -0.081 | 0.022 | 2.08E-04 | 1.56E+00 | - |
| Corpus Uteri          | Tobacco:LM.Cannabis:Herb.THC | -0.144 | 0.168 | 3.93E-01 | 1.58E+00 | - |
| Kidney                | Tobacco:LM.Cannabis:Herb.THC | -0.057 | 0.067 | 3.93E-01 | 1.58E+00 | - |
| Prostate              | Tobacco:LM.Cannabis:Herb.THC | -0.170 | 0.175 | 3.33E-01 | 1.63E+00 | - |
| Lung                  | Alcohol                      | -0.047 | 0.010 | 7.81E-06 | 1.64E+00 | - |
| Brain                 | Alcohol                      | -0.083 | 0.017 | 1.98E-06 | 1.67E+00 | - |
| Ovary                 | Income                       | -0.147 | 0.083 | 7.79E-02 | 1.69E+00 | - |
| Lung                  | Tobacco:LM.Cannabis:Herb.THC | -0.051 | 0.047 | 2.79E-01 | 1.69E+00 | - |
| Colorectum            | Income                       | -0.177 | 0.095 | 6.34E-02 | 1.71E+00 | - |
| Leukaemia - Myeloid   | Tobacco:Herb.THC             | -0.049 | 0.287 | 8.65E-01 | 1.82E+00 | - |
| Oropharynx            | Tobacco                      | -0.036 | 0.021 | 8.90E-02 | 1.84E+00 | - |
| Melanoma              | Alcohol                      | -0.141 | 0.018 | 1.91E-14 | 2.00E+00 | - |
| Kidney                | Alcohol                      | -0.125 | 0.015 | 9.01E-17 | 2.08E+00 | - |
| Melanoma              | Resin.THC                    | -0.155 | 0.237 | 5.14E-01 | 2.09E+00 | - |
| Bladder               | Alcohol                      | -0.131 | 0.015 | 2.63E-17 | 2.10E+00 | - |
| Anus                  | Income                       | -0.107 | 0.055 | 5.29E-02 | 2.10E+00 | - |
| Cervix                | Income                       | -0.323 | 0.102 | 1.55E-03 | 2.12E+00 | - |
| Pancreas              | Tobacco:LM.Cannabis:Herb.THC | -0.129 | 0.065 | 4.77E-02 | 2.14E+00 | - |
| Ovary                 | LM.Cannabis                  | -0.274 | 0.219 | 2.12E-01 | 2.15E+00 | - |
| All Cancers           | Tobacco:Herb.THC             | -0.073 | 0.120 | 5.43E-01 | 2.16E+00 | - |
| Non-Hodgkins lymphoma | LM.Cannabis:Herb.THC         | -0.204 | 3.069 | 9.47E-01 | 2.19E+00 | - |
| Liver                 | Alcohol                      | -0.151 | 0.020 | 1.82E-13 | 2.22E+00 | - |
| Ovary                 | Tobacco:LM.Cannabis:Herb.THC | -0.296 | 0.136 | 2.99E-02 | 2.24E+00 | - |
| Pancreas              | Alcohol                      | -0.147 | 0.014 | 2.37E-23 | 2.28E+00 | - |
| Larynx                | Income                       | -0.195 | 0.052 | 1.81E-04 | 2.30E+00 | - |
| Oropharynx            | Alcohol                      | -0.069 | 0.081 | 3.92E-01 | 2.51E+00 | - |
| All Cancers nNMSC     | Alcohol                      | -0.061 | 0.010 | 2.28E-09 | 2.51E+00 | - |
| Brain                 | Tobacco:LM.Cannabis:Herb.THC | -0.214 | 0.079 | 7.02E-03 | 2.52E+00 | - |

|                       |                              |        |       |          |          |   |
|-----------------------|------------------------------|--------|-------|----------|----------|---|
| Gallbladder & Biliary | Alcohol                      | -0.155 | 0.020 | 6.45E-14 | 2.57E+00 | - |
| Melanoma              | Income                       | -0.272 | 0.050 | 9.96E-08 | 2.88E+00 | - |
| Cervix                | Tobacco:LM.Cannabis:Herb.THC | -0.573 | 0.166 | 5.87E-04 | 2.97E+00 | - |
| Larynx                | Tobacco:Herb.THC             | -0.300 | 0.208 | 1.50E-01 | 3.02E+00 | - |
| Breast                | Resin.THC                    | -0.434 | 0.351 | 2.16E-01 | 3.05E+00 | - |
| Liver                 | Tobacco:Herb.THC             | -0.264 | 0.216 | 2.23E-01 | 3.16E+00 | - |
| Liver                 | Income                       | -0.276 | 0.069 | 8.05E-05 | 3.27E+00 | - |
| Bladder               | Tobacco:Herb.THC             | -0.274 | 0.169 | 1.06E-01 | 3.31E+00 | - |
| Oesophagus            | Income                       | -0.389 | 0.053 | 8.74E-13 | 3.64E+00 | - |
| Stomach               | Income                       | -0.577 | 0.074 | 2.80E-14 | 3.86E+00 | - |
| Oesophagus            | LM.Cannabis                  | -0.427 | 0.141 | 2.51E-03 | 3.97E+00 | - |
| Cervix                | LM.Cannabis                  | -0.843 | 0.267 | 1.68E-03 | 4.12E+00 | - |
| Non-Hodgkins lymphoma | Income                       | -0.495 | 0.060 | 1.28E-15 | 4.12E+00 | - |
| Non-Hodgkins lymphoma | LM.Cannabis                  | -0.496 | 0.162 | 2.30E-03 | 4.14E+00 | - |
| Testis                | Resin.THC                    | -0.988 | 0.621 | 1.12E-01 | 4.31E+00 | - |
| Bladder               | Income                       | -0.386 | 0.042 | 5.57E-19 | 4.55E+00 | - |
| Myeloma               | Tobacco:Herb.THC             | -0.258 | 0.131 | 4.91E-02 | 4.80E+00 | - |
| Oesophagus            | Tobacco:Herb.THC             | -0.545 | 0.214 | 1.13E-02 | 5.14E+00 | - |
| Brain                 | LM.Cannabis                  | -0.507 | 0.127 | 7.34E-05 | 5.32E+00 | - |
| Oropharynx            | Income                       | -0.177 | 0.300 | 5.56E-01 | 5.73E+00 | - |
| Liver                 | LM.Cannabis                  | -0.485 | 0.136 | 4.21E-04 | 5.81E+00 | - |
| Melanoma              | LM.Cannabis                  | -0.567 | 0.134 | 2.44E-05 | 5.82E+00 | - |
| Hodgkins              | Tobacco:Herb.THC             | -0.360 | 0.152 | 1.82E-02 | 5.99E+00 | - |
| Oropharynx_Broad      | Tobacco:LM.Cannabis          | -0.470 | 0.103 | 6.87E-06 | 6.20E+00 | - |
| Leukaemia - Lymphoid  | Tobacco:LM.Cannabis:Herb.THC | -0.130 | 0.132 | 3.30E-01 | 6.54E+00 | - |
| All Cancers           | Income                       | -0.315 | 0.031 | 3.15E-21 | 8.09E+00 | - |
| Testis                | Tobacco:Herb.THC             | -1.699 | 0.554 | 2.30E-03 | 8.72E+00 | - |
| All Cancers nNMSC     | Tobacco:Herb.THC             | -0.224 | 0.135 | 9.80E-02 | 9.80E+00 | - |
| Leukaemia - Myeloid   | Resin.THC                    | -0.363 | 1.347 | 7.88E-01 | 1.01E+01 | - |
| Lung                  | LM.Cannabis                  | -0.475 | 0.076 | 8.21E-10 | 1.02E+01 | - |

|                       |                              |        |       |           |          |   |
|-----------------------|------------------------------|--------|-------|-----------|----------|---|
| Kidney                | LM.Cannabis                  | -0.747 | 0.108 | 8.61E-12  | 1.25E+01 | - |
| Lung                  | Income                       | -0.532 | 0.029 | 2.31E-62  | 1.26E+01 | - |
| Leukaemia - Lymphoid  | Income                       | -0.197 | 0.180 | 2.78E-01  | 1.31E+01 | - |
| Breast                | Tobacco:Herb.THC             | -1.448 | 0.299 | 1.57E-06  | 1.43E+01 | - |
| Stomach               | Resin.THC                    | -1.453 | 0.347 | 3.21E-05  | 1.44E+01 | - |
| Kidney                | Income                       | -0.799 | 0.041 | 4.21E-69  | 1.44E+01 | - |
| Pancreas              | Income                       | -0.782 | 0.040 | 1.63E-69  | 1.45E+01 | - |
| Pancreas              | LM.Cannabis                  | -0.824 | 0.105 | 1.40E-14  | 1.62E+01 | - |
| Corpus Uteri          | Resin.THC                    | -2.146 | 0.481 | 9.27E-06  | 1.65E+01 | - |
| Kaposi                | Income                       | -0.454 | 1.090 | 6.80E-01  | 2.00E+01 | - |
| Melanoma              | Tobacco:Herb.THC             | -1.144 | 0.202 | 2.25E-08  | 2.02E+01 | - |
| Prostate              | Resin.THC                    | -2.775 | 0.500 | 4.08E-08  | 2.81E+01 | - |
| Ovary                 | Resin.THC                    | -2.242 | 0.389 | 1.21E-08  | 3.12E+01 | - |
| Colorectum            | Tobacco:Herb.THC             | -2.629 | 0.381 | 1.12E-11  | 3.37E+01 | - |
| Brain                 | Resin.THC                    | -1.344 | 0.226 | 3.98E-09  | 3.43E+01 | - |
| Cervix                | Resin.THC                    | -2.831 | 0.474 | 3.69E-09  | 3.45E+01 | - |
| Anus                  | Tobacco:Herb.THC             | -1.023 | 0.167 | 1.97E-09  | 4.20E+01 | - |
| Stomach               | LM.Cannabis:Herb.THC         | -2.308 | 3.642 | 5.26E-01  | 4.80E+01 | - |
| Gallbladder & Biliary | Tobacco:Herb.THC             | -1.066 | 0.181 | 7.86E-09  | 5.00E+01 | - |
| Kidney                | Resin.THC                    | -1.464 | 0.191 | 5.61E-14  | 7.84E+01 | - |
| Thyroid               | Tobacco:Herb.THC             | -1.520 | 0.189 | 7.00E-15  | 1.11E+02 | - |
| Leukaemia - Lymphoid  | Herb.THC                     | -0.418 | 4.638 | 9.28E-01  | 1.17E+02 | - |
| Pancreas              | Resin.THC                    | -1.625 | 0.186 | 1.72E-17  | 1.31E+02 | - |
| Anus                  | Resin.THC                    | -1.421 | 0.187 | 1.81E-13  | 1.39E+02 | - |
| Thyroid               | Resin.THC                    | -1.693 | 0.212 | 1.05E-14  | 1.75E+02 | - |
| All Cancers nNMSC     | Income                       | -0.620 | 0.024 | 9.26E-101 | 1.88E+02 | - |
| All Cancers           | Resin.THC                    | -1.041 | 0.159 | 1.98E-10  | 2.51E+02 | - |
| Oropharynx_Broad      | Tobacco:Herb.THC             | -1.969 | 0.435 | 8.51E-06  | 3.24E+02 | - |
| Leukaemia - Lymphoid  | Resin.THC                    | -0.606 | 0.636 | 3.44E-01  | 7.33E+02 | - |
| Oropharynx            | Tobacco:LM.Cannabis:Herb.THC | -0.923 | 0.273 | 1.16E-03  | 7.71E+02 | - |

|                       |                              |         |         |          |          |   |
|-----------------------|------------------------------|---------|---------|----------|----------|---|
| Kaposi                | Tobacco:LM.Cannabis:Herb.THC | -1.333  | 213.296 | 9.95E-01 | 1.86E+03 | - |
| Gallbladder & Biliary | Resin.THC                    | -2.298  | 0.262   | 4.16E-17 | 2.12E+03 | - |
| Bladder               | LM.Cannabis:Herb.THC         | -2.877  | 2.068   | 1.65E-01 | 2.19E+03 | - |
| Leukaemia - Myeloid   | LM.Cannabis:Herb.THC         | -1.725  | 9.614   | 8.58E-01 | 5.65E+03 | - |
| Liver                 | LM.Cannabis:Herb.THC         | -3.762  | 2.265   | 9.74E-02 | 1.57E+04 | - |
| Liver                 | Resin.THC                    | -3.849  | 0.246   | 1.31E-44 | 1.93E+04 | - |
| Melanoma              | LM.Cannabis:Herb.THC         | -5.839  | 2.495   | 1.95E-02 | 3.02E+05 | - |
| Oesophagus            | LM.Cannabis:Herb.THC         | -7.129  | 2.618   | 6.63E-03 | 1.78E+06 | - |
| Testis                | LM.Cannabis:Herb.THC         | -15.273 | 5.810   | 8.84E-03 | 1.91E+06 | - |
| Non-Hodgkins lymphoma | Herb.THC                     | -8.532  | 7.400   | 2.49E-01 | 4.86E+06 | - |
| Corpus Uteri          | Herb.THC                     | -14.875 | 12.662  | 2.40E-01 | 5.59E+06 | - |
| Stomach               | Herb.THC                     | -11.937 | 9.148   | 1.92E-01 | 2.90E+07 | - |
| Larynx                | LM.Cannabis:Herb.THC         | -8.956  | 2.541   | 4.50E-04 | 1.00E+08 | - |
| Prostate              | Herb.THC                     | -18.537 | 13.183  | 1.60E-01 | 1.04E+08 | - |
| Pancreas              | Herb.THC                     | -7.851  | 4.906   | 1.10E-01 | 1.21E+09 | - |
| Hodgkins              | LM.Cannabis:Herb.THC         | -6.746  | 1.594   | 2.77E-05 | 8.52E+09 | - |
| Myeloma               | LM.Cannabis:Herb.THC         | -5.829  | 1.368   | 2.45E-05 | 9.87E+09 | - |
| Breast                | LM.Cannabis:Herb.THC         | -16.472 | 3.687   | 9.17E-06 | 1.54E+10 | - |
| Kidney                | Herb.THC                     | -9.332  | 5.034   | 6.42E-02 | 2.98E+10 | - |
| Gallbladder & Biliary | LM.Cannabis:Herb.THC         | -7.797  | 1.949   | 7.45E-05 | 3.64E+10 | - |
| Lung                  | Herb.THC                     | -7.030  | 3.569   | 4.92E-02 | 1.29E+11 | - |
| Oropharynx            | LM.Cannabis                  | -3.919  | 1.073   | 4.76E-04 | 1.90E+11 | - |
| Anus                  | LM.Cannabis:Herb.THC         | -9.820  | 1.753   | 3.55E-08 | 1.12E+13 | - |
| All Cancers           | LM.Cannabis:Herb.THC         | -7.438  | 3.329   | 2.60E-02 | 1.99E+15 | - |
| Ovary                 | Herb.THC                     | -28.432 | 10.253  | 5.69E-03 | 3.31E+15 | - |
| Colorectum            | LM.Cannabis:Herb.THC         | -37.926 | 4.656   | 1.56E-15 | 1.25E+18 | - |
| All Cancers nNMSC     | LM.Cannabis:Herb.THC         | -5.658  | 1.725   | 1.09E-03 | 2.09E+18 | - |
| Brain                 | Herb.THC                     | -21.677 | 5.946   | 2.85E-04 | 2.03E+20 | - |
| Thyroid               | LM.Cannabis:Herb.THC         | -18.302 | 1.982   | 8.31E-19 | 2.03E+21 | - |
| Cervix                | Herb.THC                     | -48.198 | 12.495  | 1.24E-04 | 2.94E+21 | - |

|                  |                       |          |          |          |           |   |
|------------------|-----------------------|----------|----------|----------|-----------|---|
| Kaposi           | Tobacco               | -13.206  | 228.346  | 9.54E-01 | 5.21E+29  | - |
| Oropharynx_Broad | LM.Cannabis:Herb.THCH | -44.739  | 20.963   | 3.36E-02 | 3.36E+50  | - |
| Oropharynx       | Herb.THCH             | -49.846  | 7.923    | 1.91E-08 | 8.41E+139 | - |
| Kaposi           | LM.Cannabis           | -118.638 | 2885.207 | 9.67E-01 | Inf       | - |
| Kaposi           | LM.Cannabis:Herb.THCH | -493.820 | 9732.971 | 9.60E-01 | Inf       | - |

Supplementary Table S35.: Summary of Significant Positive Terms from

## Interactive Panel Regression at Six Temporal Lags

| Cancer                | Term                 | $\beta$ -Estimate | Std. Error | P_Value  | Adj.P.FDR | Adj.P.Holm | E-Value Estimate | E-Value 95% Lower Bound |
|-----------------------|----------------------|-------------------|------------|----------|-----------|------------|------------------|-------------------------|
| Thyroid               | Herb.THC             | 42.032            | 5.452      | 7.28E-14 | 7.28E-14  | 7.28E-14   | 3.50E+48         | 2.01E+36                |
| Anus                  | Herb.THC             | 33.645            | 4.821      | 9.88E-12 | 9.88E-12  | 9.88E-12   | 9.40E+43         | 5.41E+31                |
| Colorectum            | Herb.THC             | 89.627            | 11.695     | 5.57E-14 | 5.57E-14  | 5.57E-14   | 2.28E+42         | 4.21E+31                |
| Oropharynx            | LM.Cannabis:Herb.THC | 26.474            | 9.156      | 5.01E-03 | 5.01E-03  | 5.01E-03   | 2.87E+74         | 1.97E+24                |
| Melanoma              | Herb.THC             | 35.988            | 6.202      | 9.69E-09 | 9.69E-09  | 9.69E-09   | 1.67E+32         | 2.90E+21                |
| Gallbladder & Biliary | Herb.THC             | 25.697            | 5.031      | 4.92E-07 | 4.92E-07  | 4.92E-07   | 1.31E+34         | 1.47E+21                |
| Breast                | Herb.THC             | 49.072            | 9.167      | 1.15E-07 | 1.15E-07  | 1.15E-07   | 5.63E+29         | 9.77E+18                |
| Oropharynx            | Resin.THC            | 8.136             | 1.419      | 1.95E-07 | 1.95E-07  | 1.95E-07   | 1.23E+23         | 2.07E+15                |
| All Cancers nMSC      | Herb.THC             | 12.447            | 4.357      | 4.42E-03 | 4.42E-03  | 4.42E-03   | 8.78E+39         | 6.30E+12                |
| Oropharynx_Broad      | Herb.THC             | 28.761            | 9.112      | 1.75E-03 | 1.75E-03  | 1.75E-03   | 3.89E+32         | 3.81E+12                |
| Oropharynx_Broad      | LM.Cannabis          | 15.402            | 3.351      | 6.26E-06 | 6.26E-06  | 6.26E-06   | 3.91E+17         | 1.71E+10                |
| Testis                | Herb.THC             | 52.101            | 15.980     | 1.19E-03 | 1.19E-03  | 1.19E-03   | 5.05E+20         | 2.91E+08                |
| Oesophagus            | Herb.THC             | 21.875            | 6.577      | 9.24E-04 | 9.24E-04  | 9.24E-04   | 3.58E+18         | 6.60E+07                |
| Myeloma               | Herb.THC             | 10.996            | 3.763      | 3.64E-03 | 3.64E-03  | 3.64E-03   | 3.85E+18         | 2.22E+06                |
| Cervix                | LM.Cannabis:Herb.THC | 17.937            | 4.974      | 3.32E-04 | 3.32E-04  | 3.32E-04   | 1.51E+08         | 8.04E+03                |
| Hodgkins              | Herb.THC             | 10.998            | 4.384      | 1.24E-02 | 1.24E-02  | 1.24E-02   | 9.99E+15         | 5.75E+03                |
| Bladder               | Herb.THC             | 13.125            | 5.195      | 1.17E-02 | 1.17E-02  | 1.17E-02   | 1.46E+14         | 2.70E+03                |
| Oropharynx            | Tobacco:Herb.THC     | 1.255             | 0.222      | 2.66E-07 | 2.66E-07  | 2.66E-07   | 6.55E+03         | 3.98E+02                |
| Brain                 | LM.Cannabis:Herb.THC | 6.950             | 2.367      | 3.43E-03 | 3.43E-03  | 3.43E-03   | 5.19E+06         | 2.76E+02                |
| Thyroid               | LM.Cannabis          | 1.312             | 0.121      | 1.25E-24 | 1.25E-24  | 1.25E-24   | 6.36E+01         | 3.38E+01                |
| Oesophagus            | Resin.THC            | 1.944             | 0.250      | 2.30E-14 | 2.30E-14  | 2.30E-14   | 8.32E+01         | 3.23E+01                |
| Colorectum            | LM.Cannabis          | 2.454             | 0.250      | 1.85E-21 | 1.85E-21  | 1.85E-21   | 2.78E+01         | 1.62E+01                |



|                       |                              |       |       |          |          |          |          |          |
|-----------------------|------------------------------|-------|-------|----------|----------|----------|----------|----------|
| Myeloma               | Resin.THC                    | 0.779 | 0.146 | 1.55E-07 | 1.55E-07 | 1.55E-07 | 3.90E+01 | 1.27E+01 |
| Larynx                | LM.Cannabis                  | 1.046 | 0.137 | 5.66E-14 | 5.66E-14 | 5.66E-14 | 1.53E+01 | 8.82E+00 |
| Thyroid               | Tobacco:LM.Cannabis:Herb.THC | 0.668 | 0.066 | 6.12E-22 | 6.12E-22 | 6.12E-22 | 1.12E+01 | 7.78E+00 |
| Larynx                | Resin.THC                    | 1.139 | 0.242 | 3.07E-06 | 3.07E-06 | 3.07E-06 | 1.86E+01 | 6.92E+00 |
| Pancreas              | LM.Cannabis:Herb.THC         | 4.265 | 1.953 | 2.93E-02 | 2.93E-02 | 2.93E-02 | 1.18E+05 | 5.73E+00 |
| Breast                | LM.Cannabis                  | 1.157 | 0.197 | 6.93E-09 | 6.93E-09 | 6.93E-09 | 9.36E+00 | 5.25E+00 |
| Hodgkins              | LM.Cannabis                  | 0.514 | 0.097 | 1.97E-07 | 1.97E-07 | 1.97E-07 | 1.03E+01 | 5.24E+00 |
| Colorectum            | Tobacco:LM.Cannabis:Herb.THC | 1.150 | 0.155 | 3.59E-13 | 3.59E-13 | 3.59E-13 | 6.39E+00 | 4.43E+00 |
| Cervix                | Tobacco:Herb.THC             | 1.692 | 0.407 | 3.64E-05 | 3.64E-05 | 3.64E-05 | 1.05E+01 | 4.38E+00 |
| Ovary                 | LM.Cannabis:Herb.THC         | 8.697 | 4.082 | 3.34E-02 | 3.34E-02 | 3.34E-02 | 9.04E+04 | 4.25E+00 |
| Stomach               | LM.Cannabis                  | 0.980 | 0.196 | 6.90E-07 | 6.90E-07 | 6.90E-07 | 7.20E+00 | 3.99E+00 |
| Anus                  | Tobacco:LM.Cannabis:Herb.THC | 0.348 | 0.058 | 4.81E-09 | 4.81E-09 | 4.81E-09 | 5.11E+00 | 3.44E+00 |
| Brain                 | Tobacco:Herb.THC             | 0.708 | 0.194 | 2.76E-04 | 2.76E-04 | 2.76E-04 | 8.48E+00 | 3.44E+00 |
| Lung                  | Resin.THC                    | 0.445 | 0.135 | 1.06E-03 | 1.06E-03 | 1.06E-03 | 9.15E+00 | 3.20E+00 |
| Ovary                 | Tobacco:Herb.THC             | 1.123 | 0.334 | 8.13E-04 | 8.13E-04 | 8.13E-04 | 7.45E+00 | 2.97E+00 |
| Oropharynx Broad      | Tobacco:LM.Cannabis:Herb.THC | 1.495 | 0.655 | 2.30E-02 | 2.30E-02 | 2.30E-02 | 9.49E+01 | 2.88E+00 |
| Lung                  | Tobacco:Herb.THC             | 0.381 | 0.116 | 1.09E-03 | 1.09E-03 | 1.09E-03 | 7.18E+00 | 2.84E+00 |
| All Cancers nMSC      | Tobacco:LM.Cannabis:Herb.THC | 0.182 | 0.055 | 1.02E-03 | 1.02E-03 | 1.02E-03 | 7.06E+00 | 2.84E+00 |
| Hodgkins              | Resin.THC                    | 0.498 | 0.170 | 3.67E-03 | 3.67E-03 | 3.67E-03 | 9.74E+00 | 2.82E+00 |
| Oropharynx Broad      | Alcohol                      | 0.499 | 0.149 | 9.17E-04 | 9.17E-04 | 9.17E-04 | 6.72E+00 | 2.81E+00 |
| Oropharynx            | Tobacco:LM.Cannabis          | 0.133 | 0.031 | 6.84E-05 | 6.84E-05 | 6.84E-05 | 4.14E+00 | 2.54E+00 |
| Myeloma               | LM.Cannabis                  | 0.280 | 0.084 | 8.81E-04 | 8.81E-04 | 8.81E-04 | 5.29E+00 | 2.50E+00 |
| Leukaemia – Lymphoid  | Alcohol                      | 0.125 | 0.041 | 2.71E-03 | 2.71E-03 | 2.71E-03 | 6.20E+00 | 2.49E+00 |
| Leukaemia – Myeloid   | Alcohol                      | 0.262 | 0.086 | 2.86E-03 | 2.86E-03 | 2.86E-03 | 6.15E+00 | 2.46E+00 |
| Kidney                | Tobacco:Herb.THC             | 0.490 | 0.164 | 2.89E-03 | 2.89E-03 | 2.89E-03 | 6.30E+00 | 2.43E+00 |
| Breast                | Tobacco:LM.Cannabis:Herb.THC | 0.538 | 0.124 | 1.51E-05 | 1.51E-05 | 1.51E-05 | 3.63E+00 | 2.38E+00 |
| Hodgkins              | Tobacco:LM.Cannabis:Herb.THC | 0.228 | 0.053 | 2.19E-05 | 2.19E-05 | 2.19E-05 | 3.65E+00 | 2.37E+00 |
| Pancreas              | Tobacco:Herb.THC             | 0.456 | 0.160 | 4.50E-03 | 4.50E-03 | 4.50E-03 | 5.92E+00 | 2.25E+00 |
| Myeloma               | Tobacco:LM.Cannabis:Herb.THC | 0.185 | 0.046 | 6.03E-05 | 6.03E-05 | 6.03E-05 | 3.47E+00 | 2.24E+00 |
| Gallbladder & Biliary | Tobacco:LM.Cannabis:Herb.THC | 0.238 | 0.065 | 2.67E-04 | 2.67E-04 | 2.67E-04 | 3.53E+00 | 2.15E+00 |

|                       |                              |       |       |          |          |          |          |          |
|-----------------------|------------------------------|-------|-------|----------|----------|----------|----------|----------|
| Testis                | LM.Cannabis                  | 1.066 | 0.355 | 2.81E-03 | 2.81E-03 | 2.81E-03 | 4.67E+00 | 2.14E+00 |
| Gallbladder & Biliary | Tobacco                      | 0.098 | 0.011 | 1.14E-17 | 1.14E-17 | 1.14E-17 | 2.03E+00 | 1.84E+00 |
| Larynx                | Alcohol                      | 0.148 | 0.019 | 7.76E-15 | 7.76E-15 | 7.76E-15 | 2.01E+00 | 1.80E+00 |
| Testis                | Income                       | 0.597 | 0.183 | 1.16E-03 | 1.16E-03 | 1.16E-03 | 2.82E+00 | 1.79E+00 |
| Stomach               | Tobacco:Herb.THC             | 0.737 | 0.298 | 1.37E-02 | 1.37E-02 | 1.37E-02 | 4.98E+00 | 1.78E+00 |
| Oropharynx Broad      | Tobacco                      | 0.166 | 0.044 | 2.23E-04 | 2.23E-04 | 2.23E-04 | 2.44E+00 | 1.75E+00 |
| All Cancers           | Tobacco:LM.Cannabis:Herb.THC | 0.253 | 0.107 | 1.85E-02 | 1.85E-02 | 1.85E-02 | 5.92E+00 | 1.75E+00 |
| Colorectum            | Resin.THC                    | 1.055 | 0.444 | 1.77E-02 | 1.77E-02 | 1.77E-02 | 5.70E+00 | 1.75E+00 |
| Larynx                | Tobacco:LM.Cannabis:Herb.THC | 0.257 | 0.085 | 2.55E-03 | 2.55E-03 | 2.55E-03 | 2.71E+00 | 1.68E+00 |
| Melanoma              | Tobacco:LM.Cannabis:Herb.THC | 0.233 | 0.084 | 5.53E-03 | 5.53E-03 | 5.53E-03 | 2.60E+00 | 1.57E+00 |
| Colorectum            | Tobacco                      | 0.157 | 0.017 | 1.40E-18 | 1.40E-18 | 1.40E-18 | 1.65E+00 | 1.54E+00 |
| Oesophagus            | Tobacco:LM.Cannabis:Herb.THC | 0.236 | 0.087 | 7.05E-03 | 7.05E-03 | 7.05E-03 | 2.52E+00 | 1.52E+00 |
| Testis                | Tobacco:LM.Cannabis:Herb.THC | 0.504 | 0.194 | 9.60E-03 | 9.60E-03 | 9.60E-03 | 2.53E+00 | 1.48E+00 |
| Breast                | Income                       | 0.225 | 0.075 | 2.64E-03 | 2.64E-03 | 2.64E-03 | 2.07E+00 | 1.47E+00 |
| Breast                | Tobacco                      | 0.102 | 0.014 | 1.83E-13 | 1.83E-13 | 1.83E-13 | 1.57E+00 | 1.46E+00 |
| Thyroid               | Alcohol                      | 0.074 | 0.018 | 3.88E-05 | 3.88E-05 | 3.88E-05 | 1.73E+00 | 1.46E+00 |
| Oropharynx Broad      | Income                       | 0.184 | 0.074 | 1.34E-02 | 1.34E-02 | 1.34E-02 | 2.60E+00 | 1.45E+00 |
| All Cancers           | Alcohol                      | 0.048 | 0.015 | 2.12E-03 | 2.12E-03 | 2.12E-03 | 1.80E+00 | 1.39E+00 |
| Bladder               | Resin.THC                    | 0.414 | 0.197 | 3.61E-02 | 3.61E-02 | 3.61E-02 | 4.92E+00 | 1.35E+00 |
| All Cancers nMSC      | Tobacco                      | 0.021 | 0.006 | 9.66E-04 | 9.66E-04 | 9.66E-04 | 1.60E+00 | 1.33E+00 |
| Thyroid               | Tobacco                      | 0.036 | 0.009 | 9.34E-05 | 9.34E-05 | 9.34E-05 | 1.43E+00 | 1.27E+00 |
| Testis                | Tobacco                      | 0.104 | 0.027 | 1.12E-04 | 1.12E-04 | 1.12E-04 | 1.43E+00 | 1.27E+00 |
| Pancreas              | Tobacco:LM.Cannabis          | 0.025 | 0.003 | 2.58E-12 | 2.58E-12 | 2.58E-12 | 1.33E+00 | 1.27E+00 |
| Colorectum            | Alcohol                      | 0.102 | 0.034 | 2.74E-03 | 2.74E-03 | 2.74E-03 | 1.48E+00 | 1.24E+00 |
| Kidney                | Tobacco:LM.Cannabis          | 0.021 | 0.004 | 2.92E-09 | 2.92E-09 | 2.92E-09 | 1.30E+00 | 1.23E+00 |
| Lung                  | Tobacco:LM.Cannabis          | 0.015 | 0.003 | 4.98E-09 | 4.98E-09 | 4.98E-09 | 1.29E+00 | 1.23E+00 |
| Stomach               | Tobacco                      | 0.050 | 0.014 | 2.47E-04 | 2.47E-04 | 2.47E-04 | 1.35E+00 | 1.22E+00 |
| Bladder               | Tobacco                      | 0.028 | 0.008 | 2.71E-04 | 2.71E-04 | 2.71E-04 | 1.35E+00 | 1.22E+00 |
| Hodgkins              | Alcohol                      | 0.037 | 0.014 | 1.01E-02 | 1.01E-02 | 1.01E-02 | 1.51E+00 | 1.21E+00 |
| Liver                 | Tobacco:LM.Cannabis:Herb.THC | 0.159 | 0.075 | 3.46E-02 | 3.46E-02 | 3.46E-02 | 2.28E+00 | 1.20E+00 |

|                       |                     |       |       |          |          |          |          |          |
|-----------------------|---------------------|-------|-------|----------|----------|----------|----------|----------|
| Liver                 | Tobacco:LM.Cannabis | 0.018 | 0.004 | 5.02E-05 | 5.02E-05 | 5.02E-05 | 1.26E+00 | 1.17E+00 |
| Melanoma              | Tobacco             | 0.028 | 0.009 | 2.12E-03 | 2.12E-03 | 2.12E-03 | 1.31E+00 | 1.17E+00 |
| Prostate              | Tobacco:Herb.THC    | 0.858 | 0.430 | 4.61E-02 | 4.61E-02 | 4.61E-02 | 3.98E+00 | 1.15E+00 |
| Larynx                | Tobacco             | 0.027 | 0.009 | 4.25E-03 | 4.25E-03 | 4.25E-03 | 1.30E+00 | 1.15E+00 |
| Anus                  | Tobacco             | 0.020 | 0.008 | 1.14E-02 | 1.14E-02 | 1.14E-02 | 1.32E+00 | 1.13E+00 |
| Corpus Uteri          | Tobacco             | 0.050 | 0.019 | 8.37E-03 | 8.37E-03 | 8.37E-03 | 1.28E+00 | 1.13E+00 |
| Brain                 | Tobacco:LM.Cannabis | 0.014 | 0.004 | 1.02E-03 | 1.02E-03 | 1.02E-03 | 1.20E+00 | 1.12E+00 |
| Melanoma              | Tobacco:LM.Cannabis | 0.014 | 0.004 | 1.60E-03 | 1.60E-03 | 1.60E-03 | 1.20E+00 | 1.12E+00 |
| Brain                 | Income              | 0.099 | 0.048 | 3.99E-02 | 3.99E-02 | 3.99E-02 | 1.77E+00 | 1.11E+00 |
| Oesophagus            | Tobacco:LM.Cannabis | 0.014 | 0.005 | 2.96E-03 | 2.96E-03 | 2.96E-03 | 1.19E+00 | 1.11E+00 |
| Non-Hodgkins lymphoma | Tobacco:LM.Cannabis | 0.015 | 0.005 | 3.83E-03 | 3.83E-03 | 3.83E-03 | 1.19E+00 | 1.10E+00 |
| Cervix                | Tobacco:LM.Cannabis | 0.022 | 0.009 | 1.08E-02 | 1.08E-02 | 1.08E-02 | 1.18E+00 | 1.08E+00 |
| Stomach               | Alcohol             | 0.055 | 0.027 | 4.06E-02 | 4.06E-02 | 4.06E-02 | 1.37E+00 | 1.06E+00 |
| Prostate              | Tobacco             | 0.040 | 0.020 | 4.05E-02 | 4.05E-02 | 4.05E-02 | 1.24E+00 | 1.04E+00 |

Table Key: As in Tables 8 and 12.

Supplementary Table S36.: Summary of Significant Positive Terms from  
Interactive Panel Regression at Six Temporal Lags

| Term                         | Count | Negative<br>Total of P-<br>Value<br>Exponents | Mean of the<br>Negative P-<br>Value<br>Exponents | Median of<br>the Negative<br>P-Value<br>Exponents | Total of the<br>Lower E-<br>Value<br>Exponents | Mean of the<br>Lower E-<br>Value<br>Exponents | Median of<br>the Lower E-<br>Value<br>Exponents |
|------------------------------|-------|-----------------------------------------------|--------------------------------------------------|---------------------------------------------------|------------------------------------------------|-----------------------------------------------|-------------------------------------------------|
| Herb.THC                     | 13    | 70                                            | 5.38                                             | 3                                                 | 209                                            | 16.08                                         | 12                                              |
| LM.Cannabis : Herb.THC       | 5     | 9                                             | 1.80                                             | 2                                                 | 29                                             | 5.80                                          | 2                                               |
| Resin.THC                    | 8     | 36                                            | 4.50                                             | 3.5                                               | 17                                             | 2.13                                          | 0                                               |
| LM.Cannabis                  | 9     | 86                                            | 9.56                                             | 6                                                 | 12                                             | 1.33                                          | 0                                               |
| Tobacco: Herb.THC            | 9     | 24                                            | 2.67                                             | 2                                                 | 2                                              | 0.22                                          | 0                                               |
| Alcohol                      | 9     | 31                                            | 3.44                                             | 2                                                 | 0                                              | 0                                             | 0                                               |
| Income                       | 4     | 6                                             | 1.50                                             | 1.5                                               | 0                                              | 0                                             | 0                                               |
| Tobacco                      | 14    | 72                                            | 5.14                                             | 3                                                 | 0                                              | 0                                             | 0                                               |
| Tobacco:LM.Cannabis          | 10    | 44                                            | 4.40                                             | 3                                                 | 0                                              | 0                                             | 0                                               |
| Tobacco:LM.Cannabis:Herb.THC | 15    | 69                                            | 4.6                                              | 2                                                 | 0                                              | 0                                             | 0                                               |

Table Key: “:” – Interaction; LM.Cannabis – Last Month cannabis use; Herb.THC – THC concentration of cannabis herb.



## SUPPLEMENTARY FIGURES

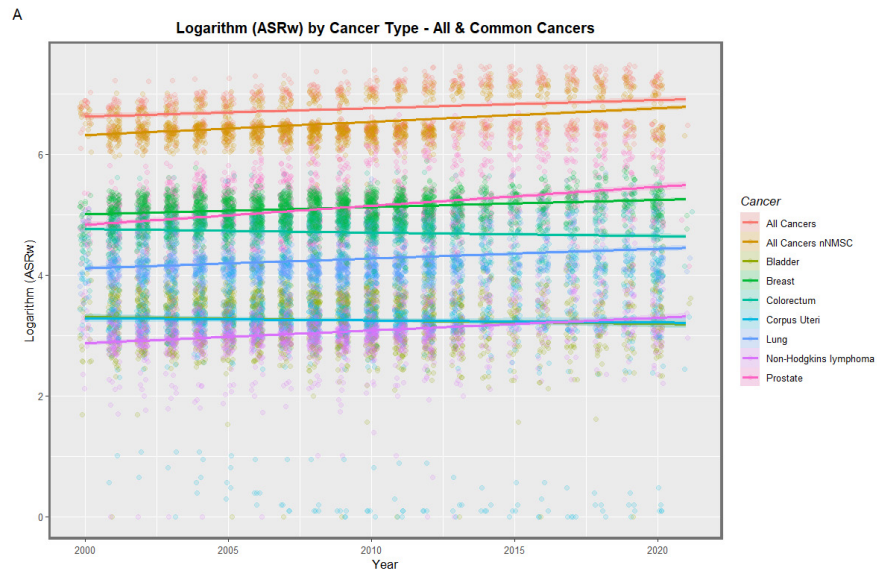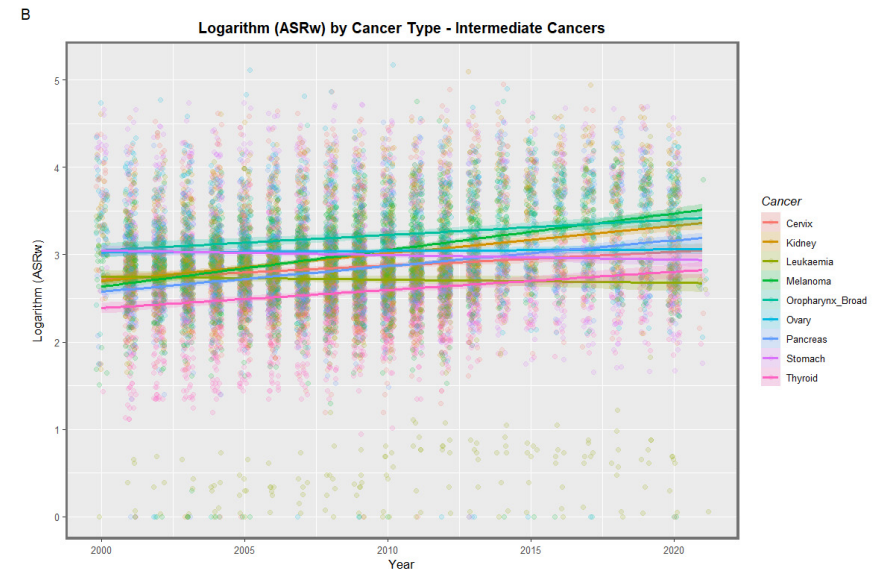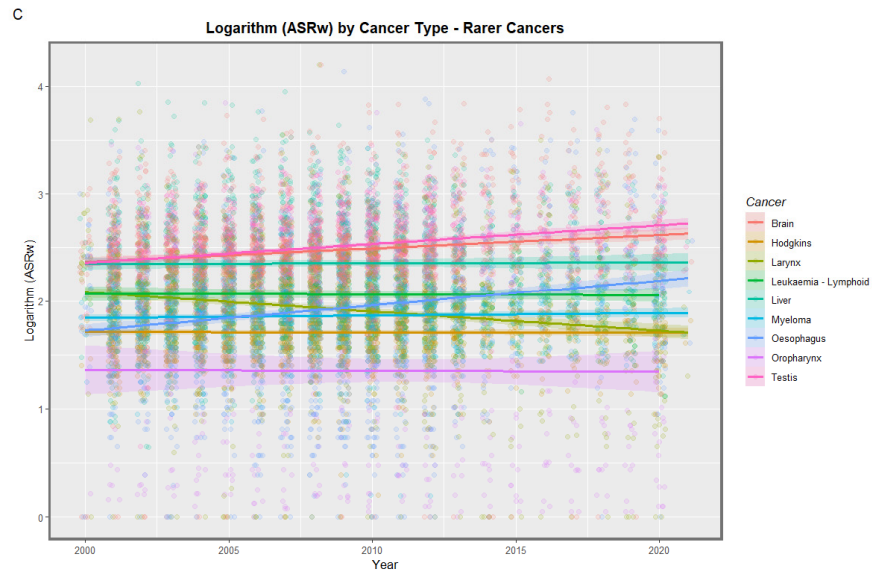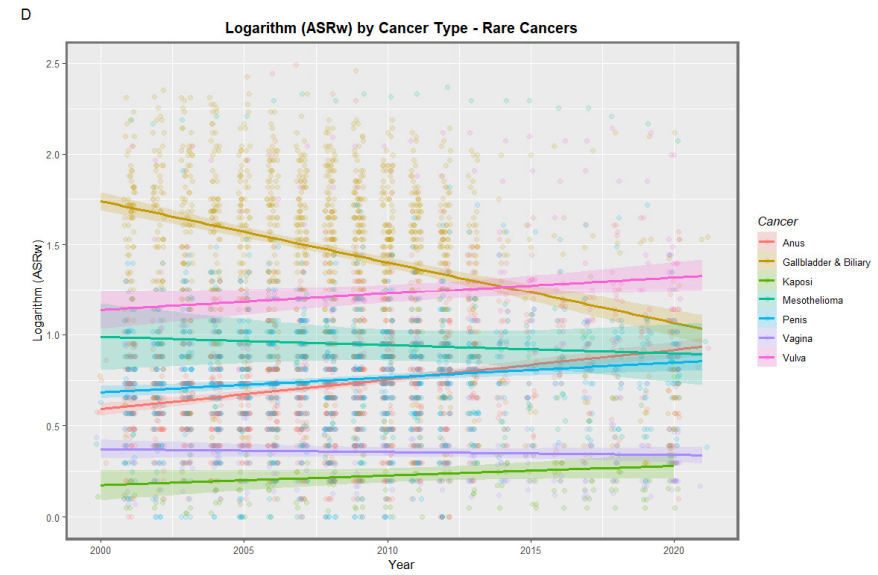

Supplementary Figure S1.: Cancer trends across time for (A) common, (B) intermediate, (C) rarer and (D) rare cancer types.



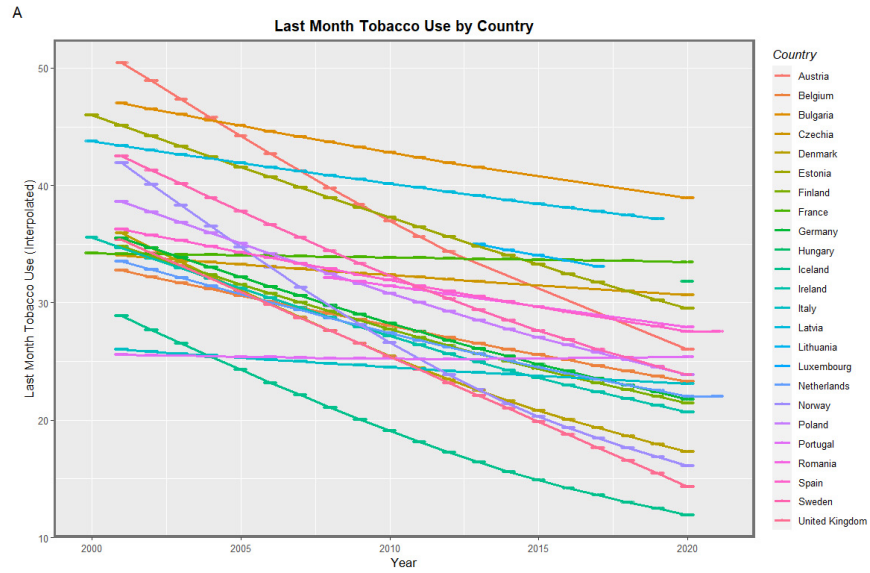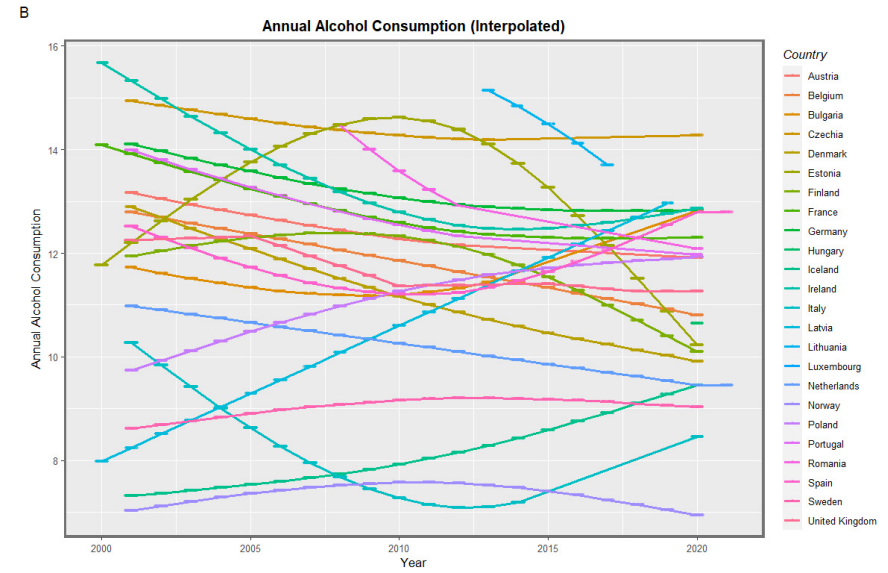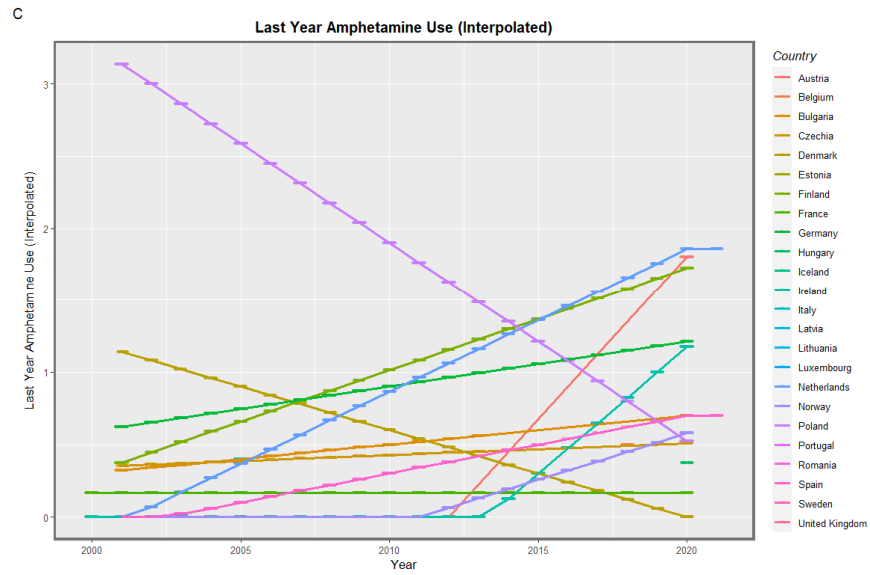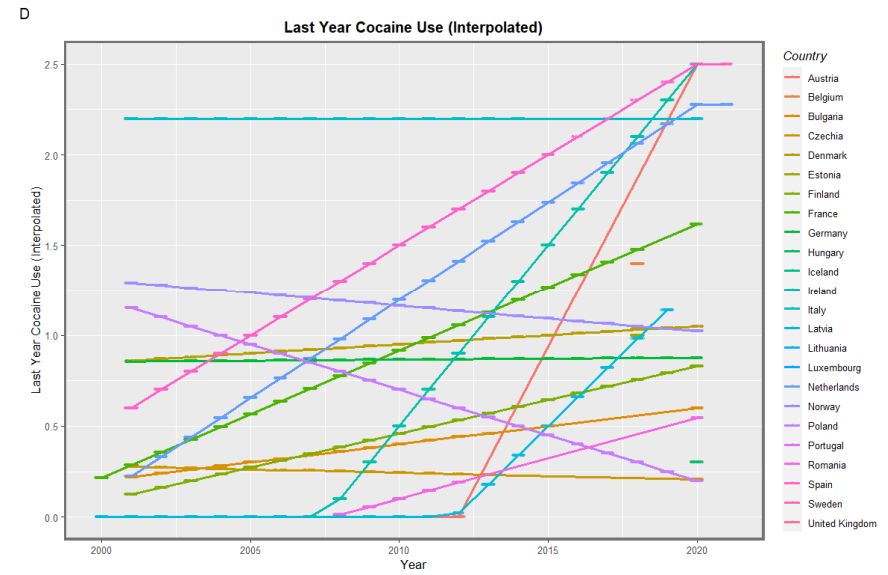

Supplementary Figure S2.: Trends in substance use across time interpolated for (A) last month tobacco use, (B) annual alcohol consumption, (C) last year amphetamine use and (D) last year cocaine use.

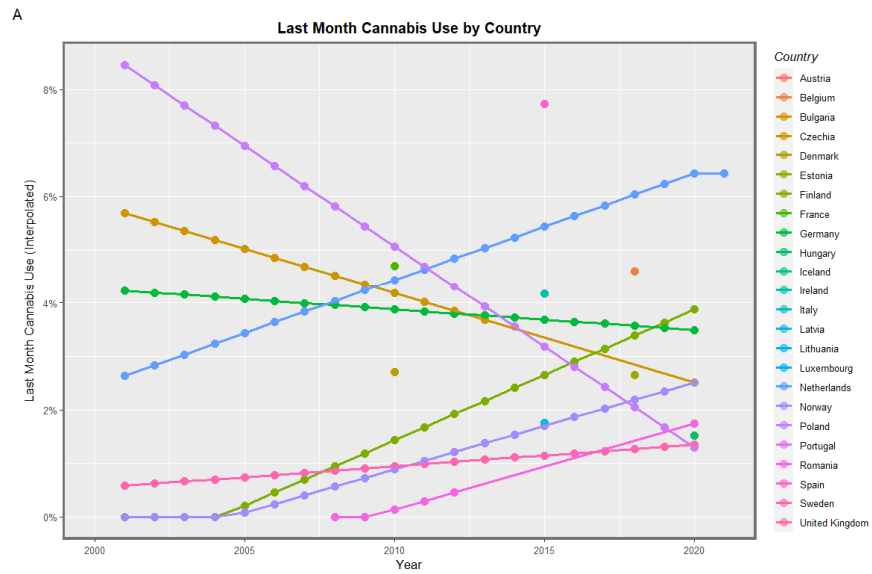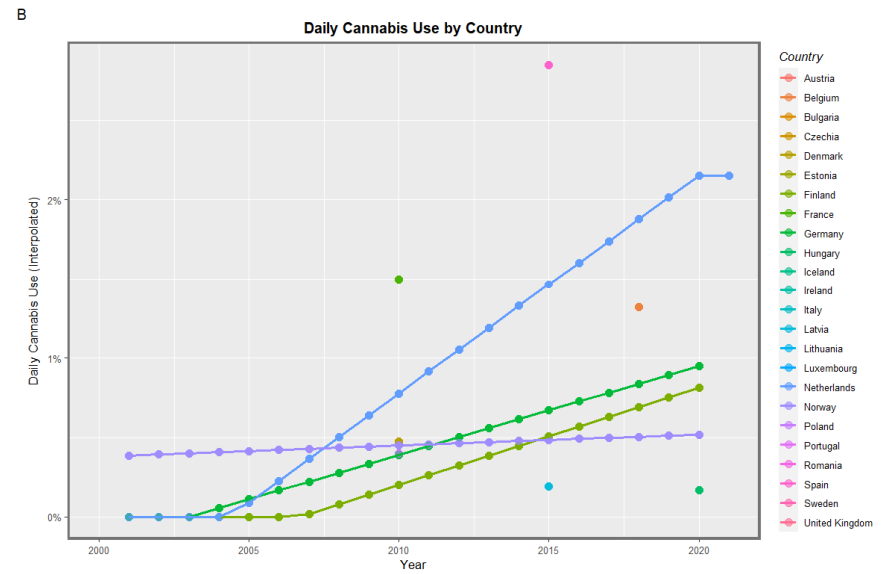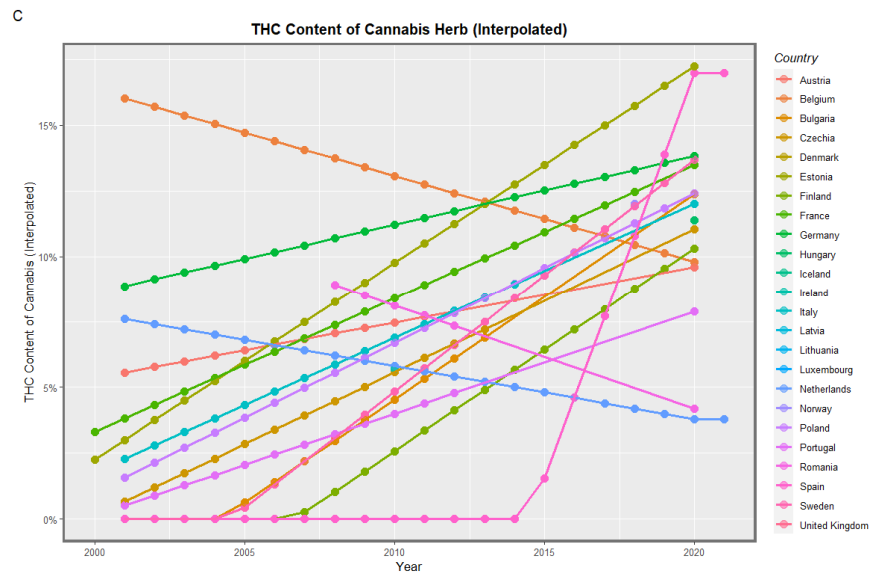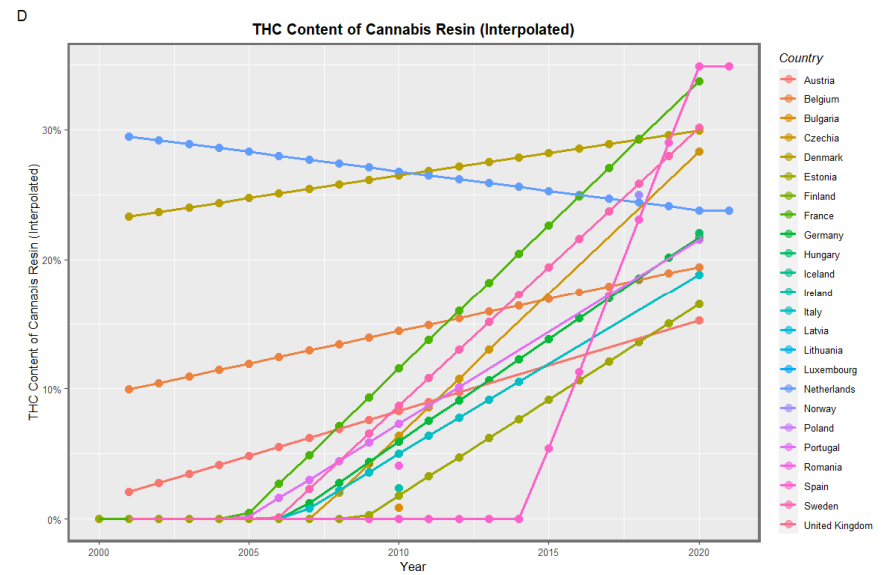

Supplementary Figure S3.: Trends across time for selected cannabis metrics. (A) Last month cannabis use, (B) daily cannabis use, (C) THC concentration of cannabis herb and (D) THC concentration of cannabis resin.

Time Course of Selected Cancers Across Europe

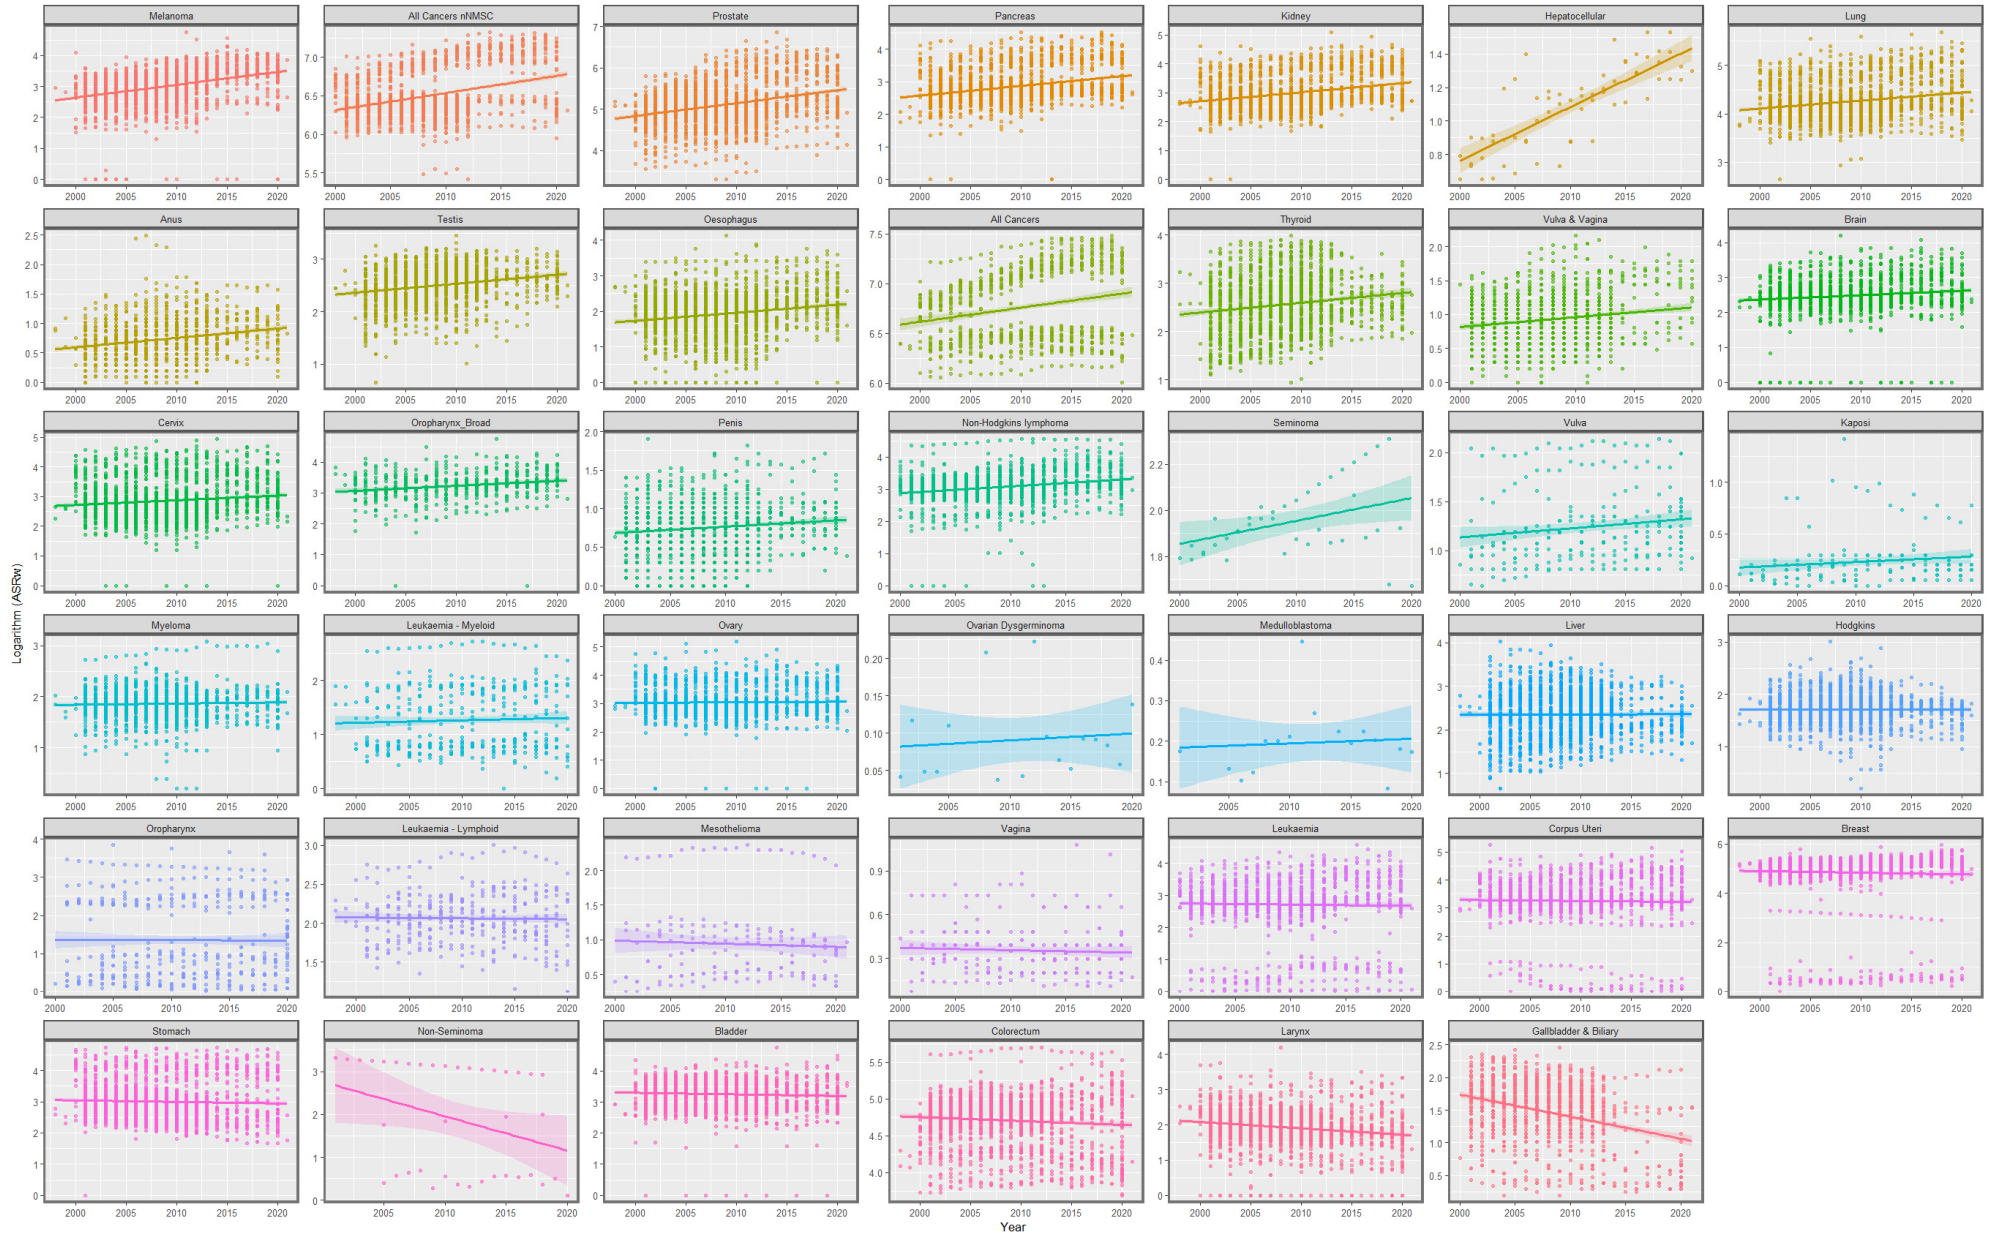

Supplementary Figure S4.: Trends across time for selected cancer types. The log of the age standardized rate standardized to the world population 1976 is plotted on the ordinate axis.

Rate of Selected Cancers by Last Year Amphetamine Use

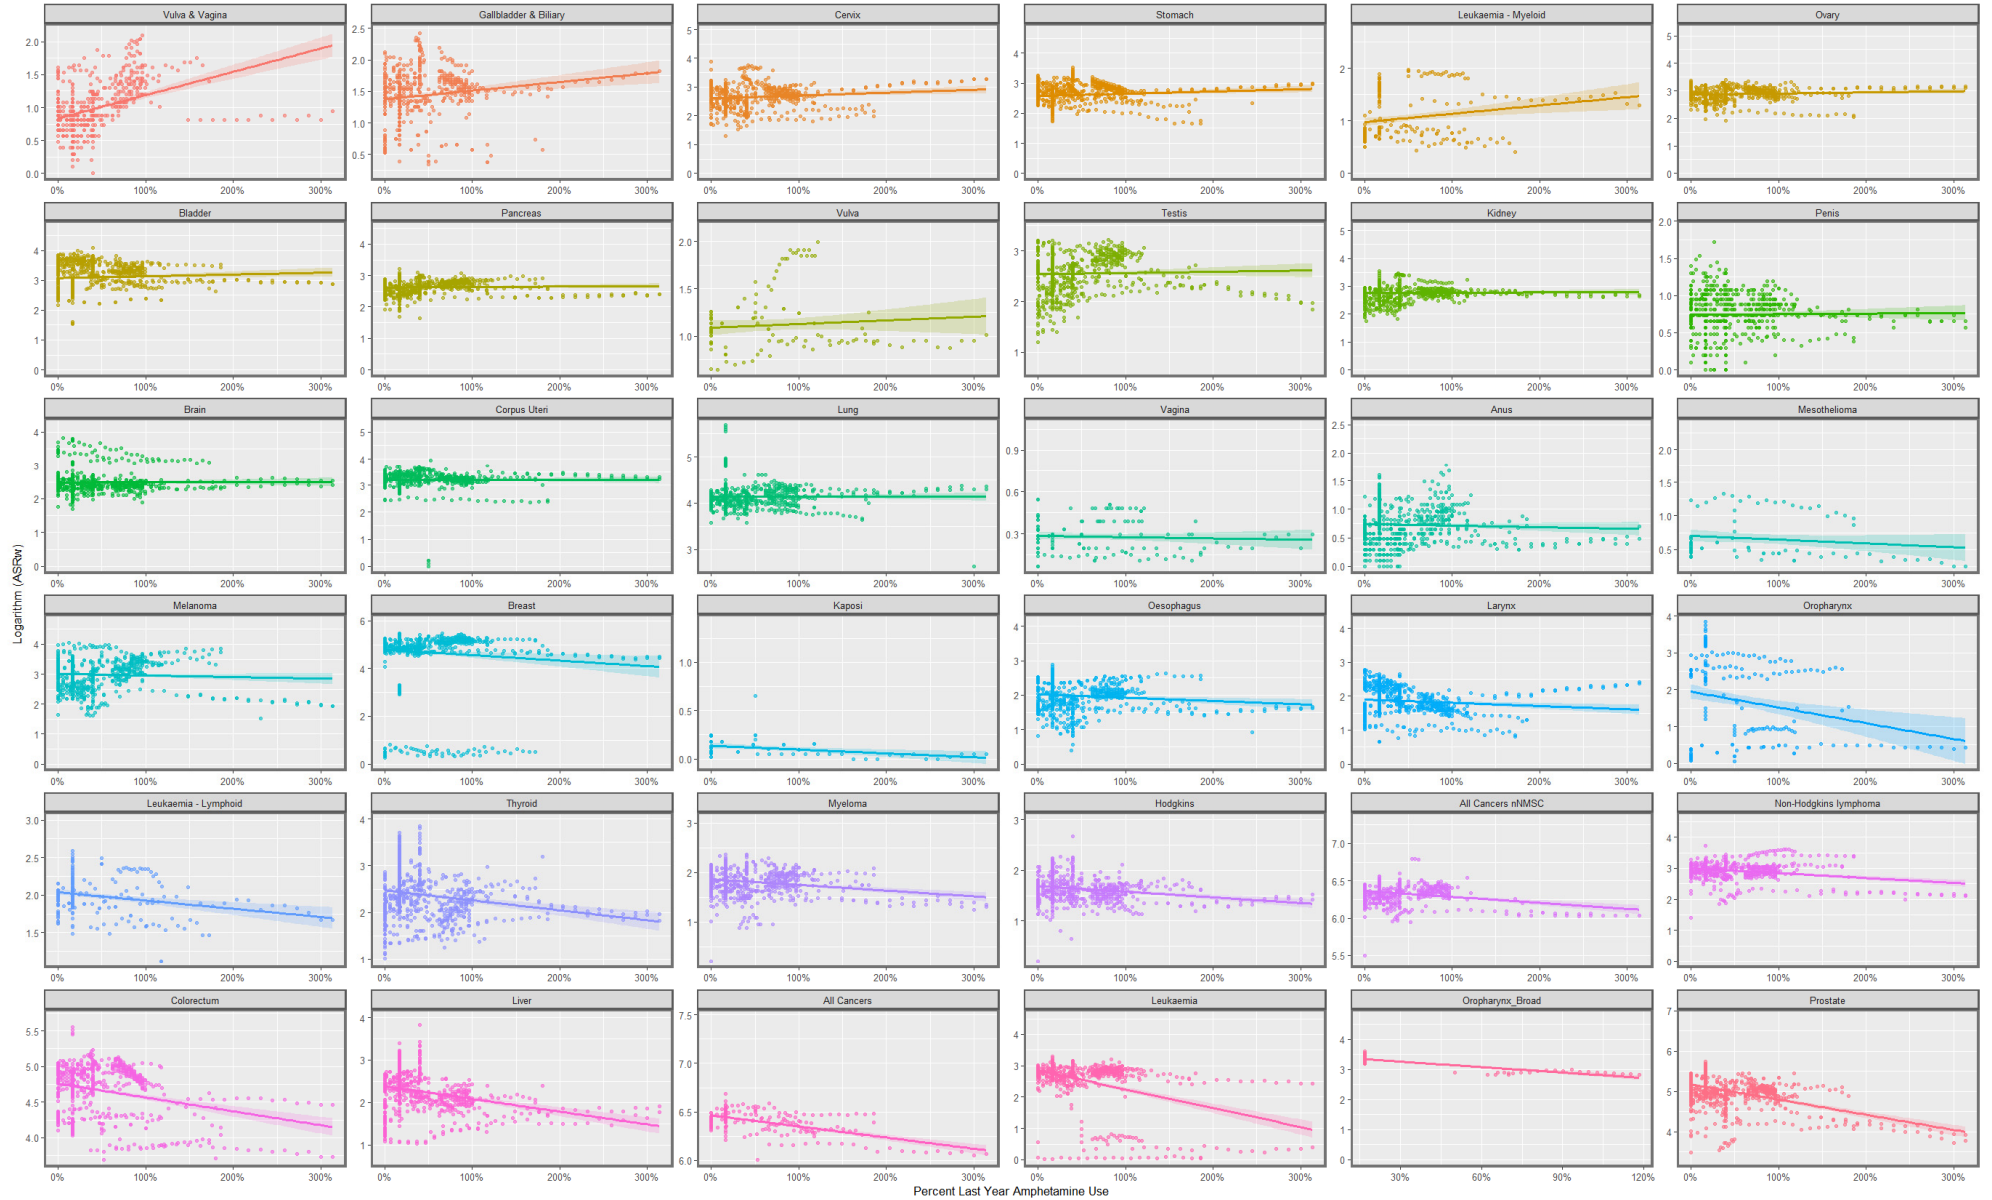

Supplementary Figure S5.: The log ASRw of selected cancers against last year amphetamine use.



Rate of Selected Cancers by Last Year Cocaine Use

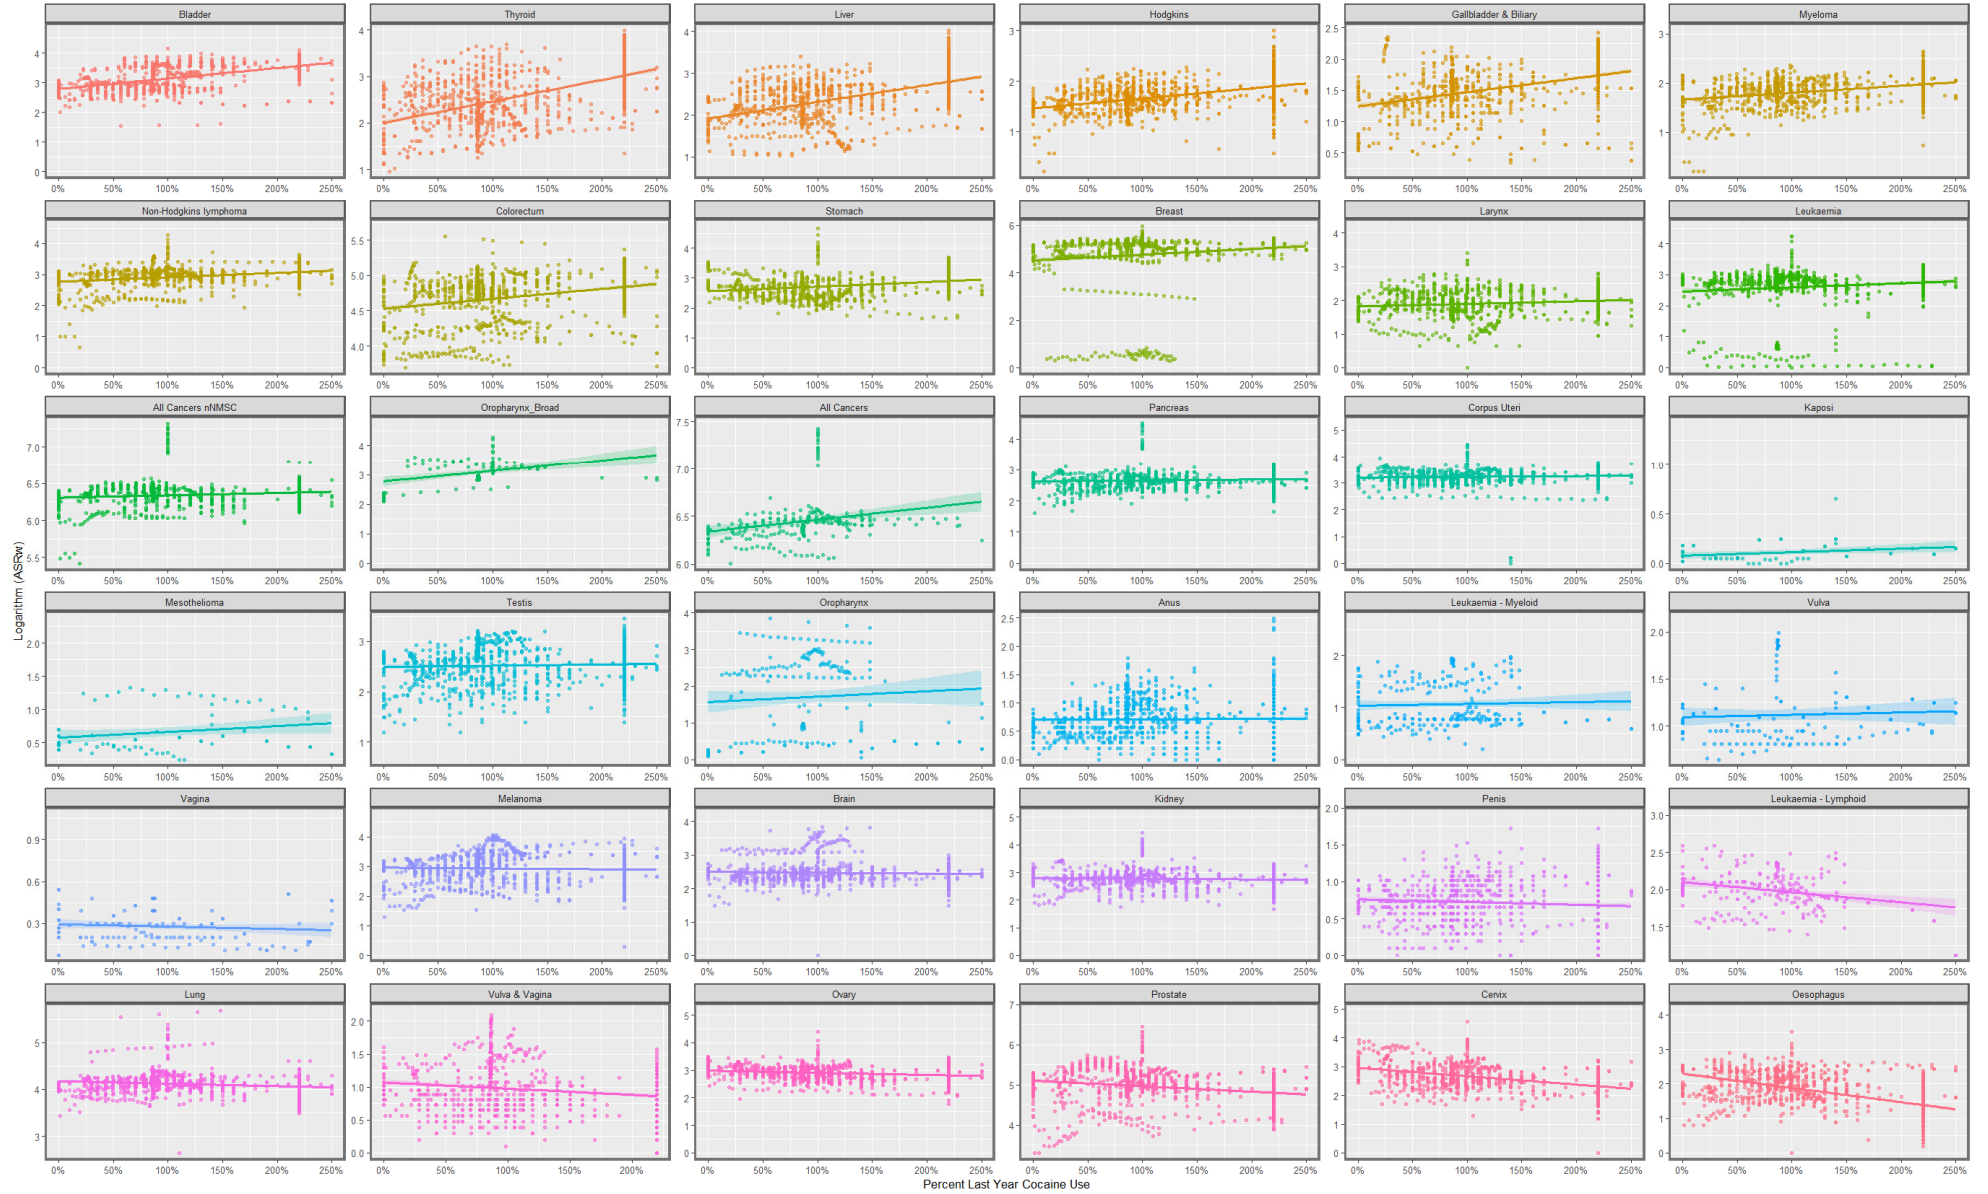

Supplementary Figure S6.: The log ASRw of selected cancers against last year cocaine amphetamine use.

Correlation Plot - Correlation Plot - Substances and Common Cancer Rates

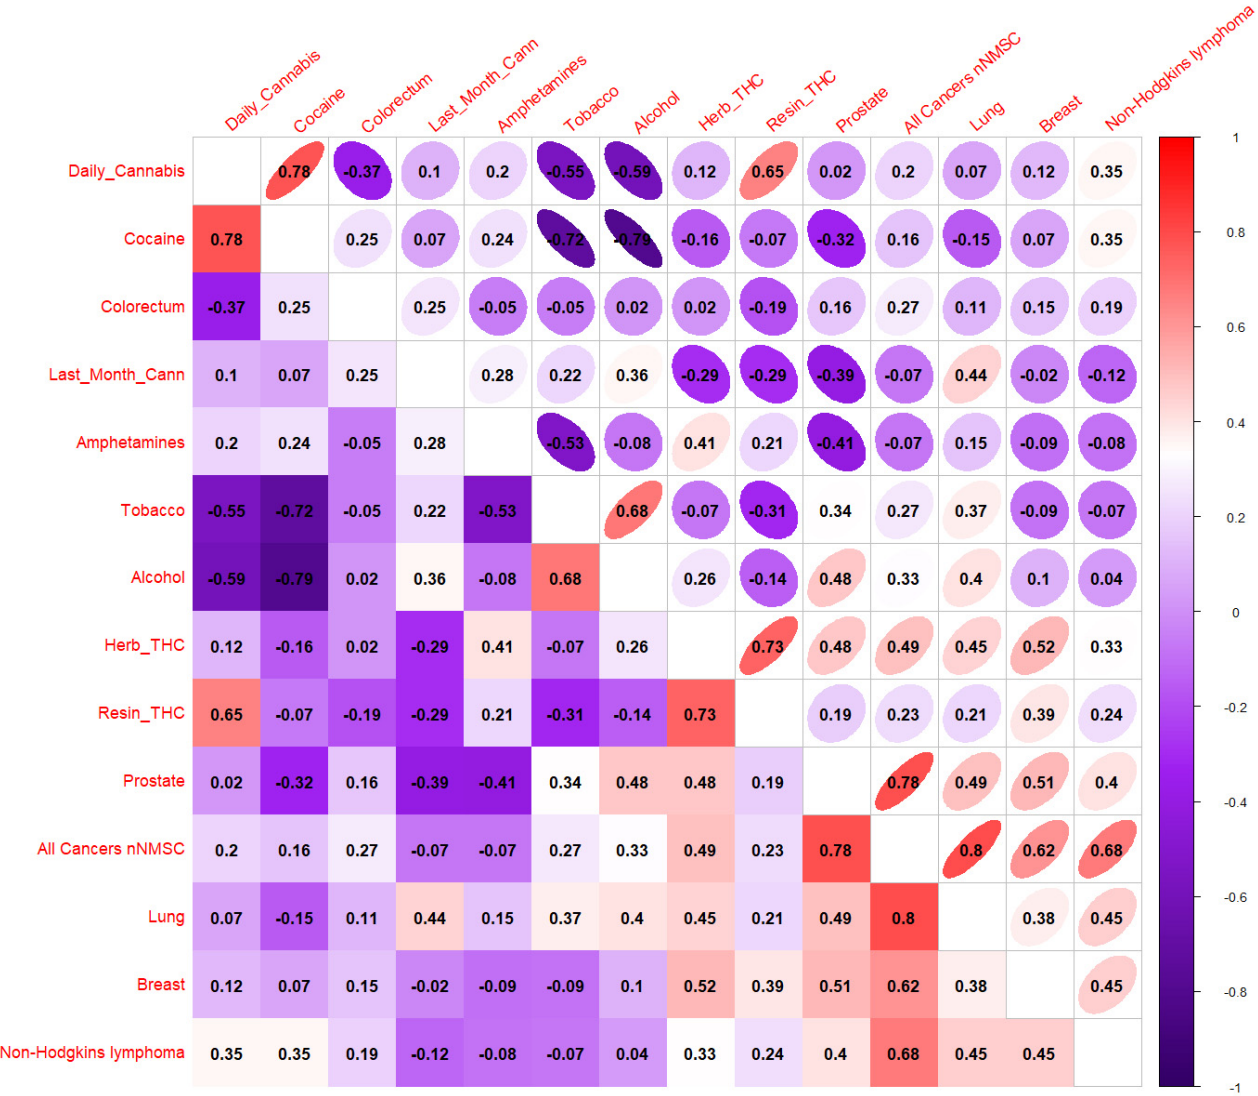

Supplementary Figure S7.: Correlogram as Correlation Matrix for Bivariate Relationships.

Significance Level Plot - Substances and Common Cancer Rates

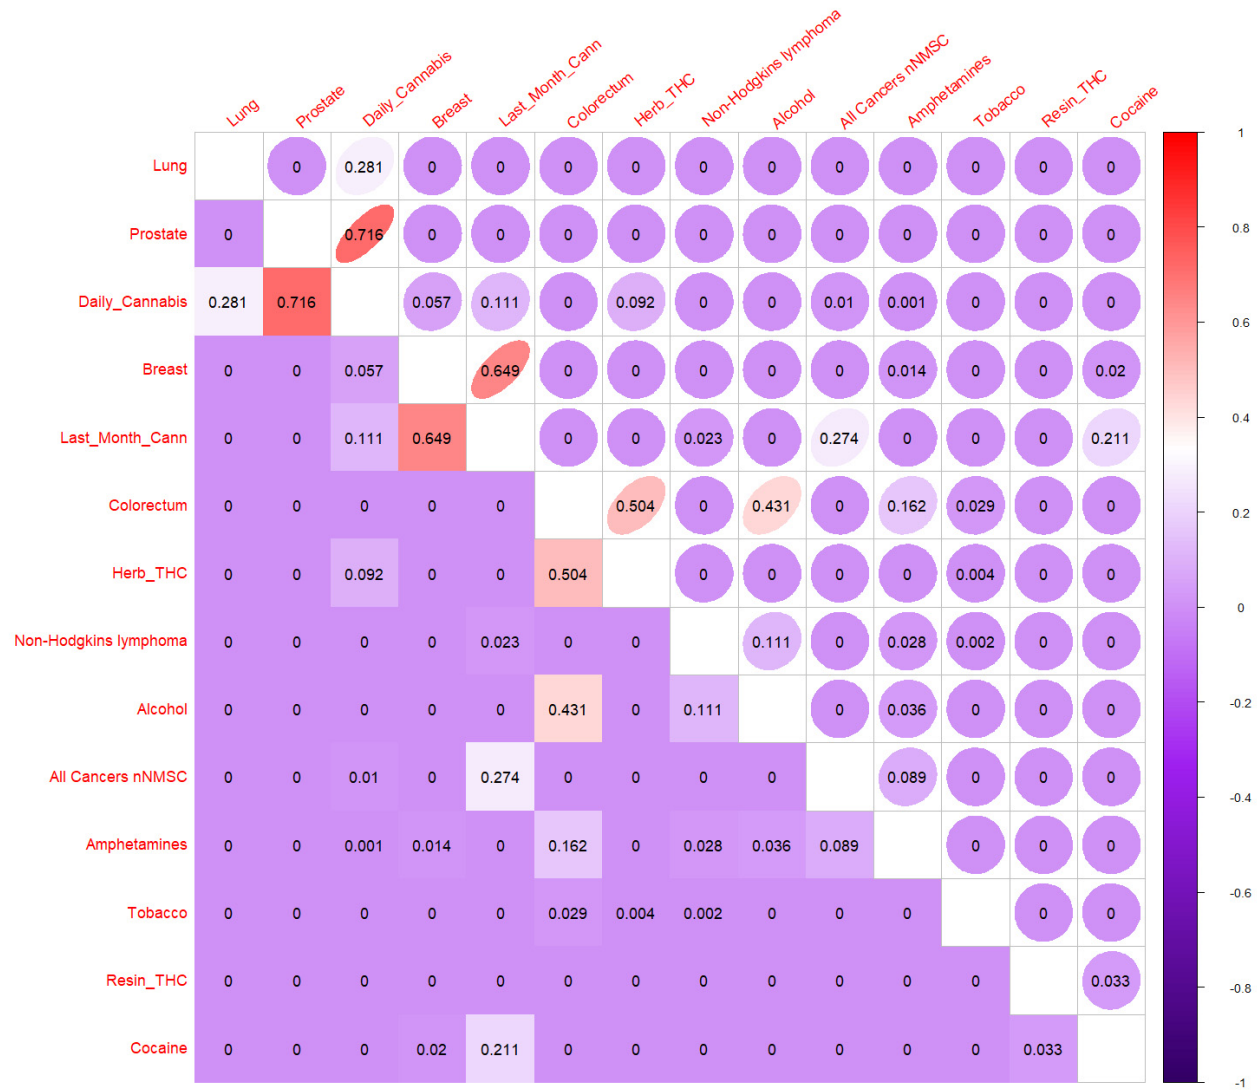

Supplementary Figure S8.: Significance of Correlation Matrix for Bivariate Relationships.



Supplementary Figure S9.: Semiquantitative significance testing results from the correlogram shown in Supplementary Figure S7 in the main text.



All Cancer Log (ASRw) Across Europe Over Time for All Cancers

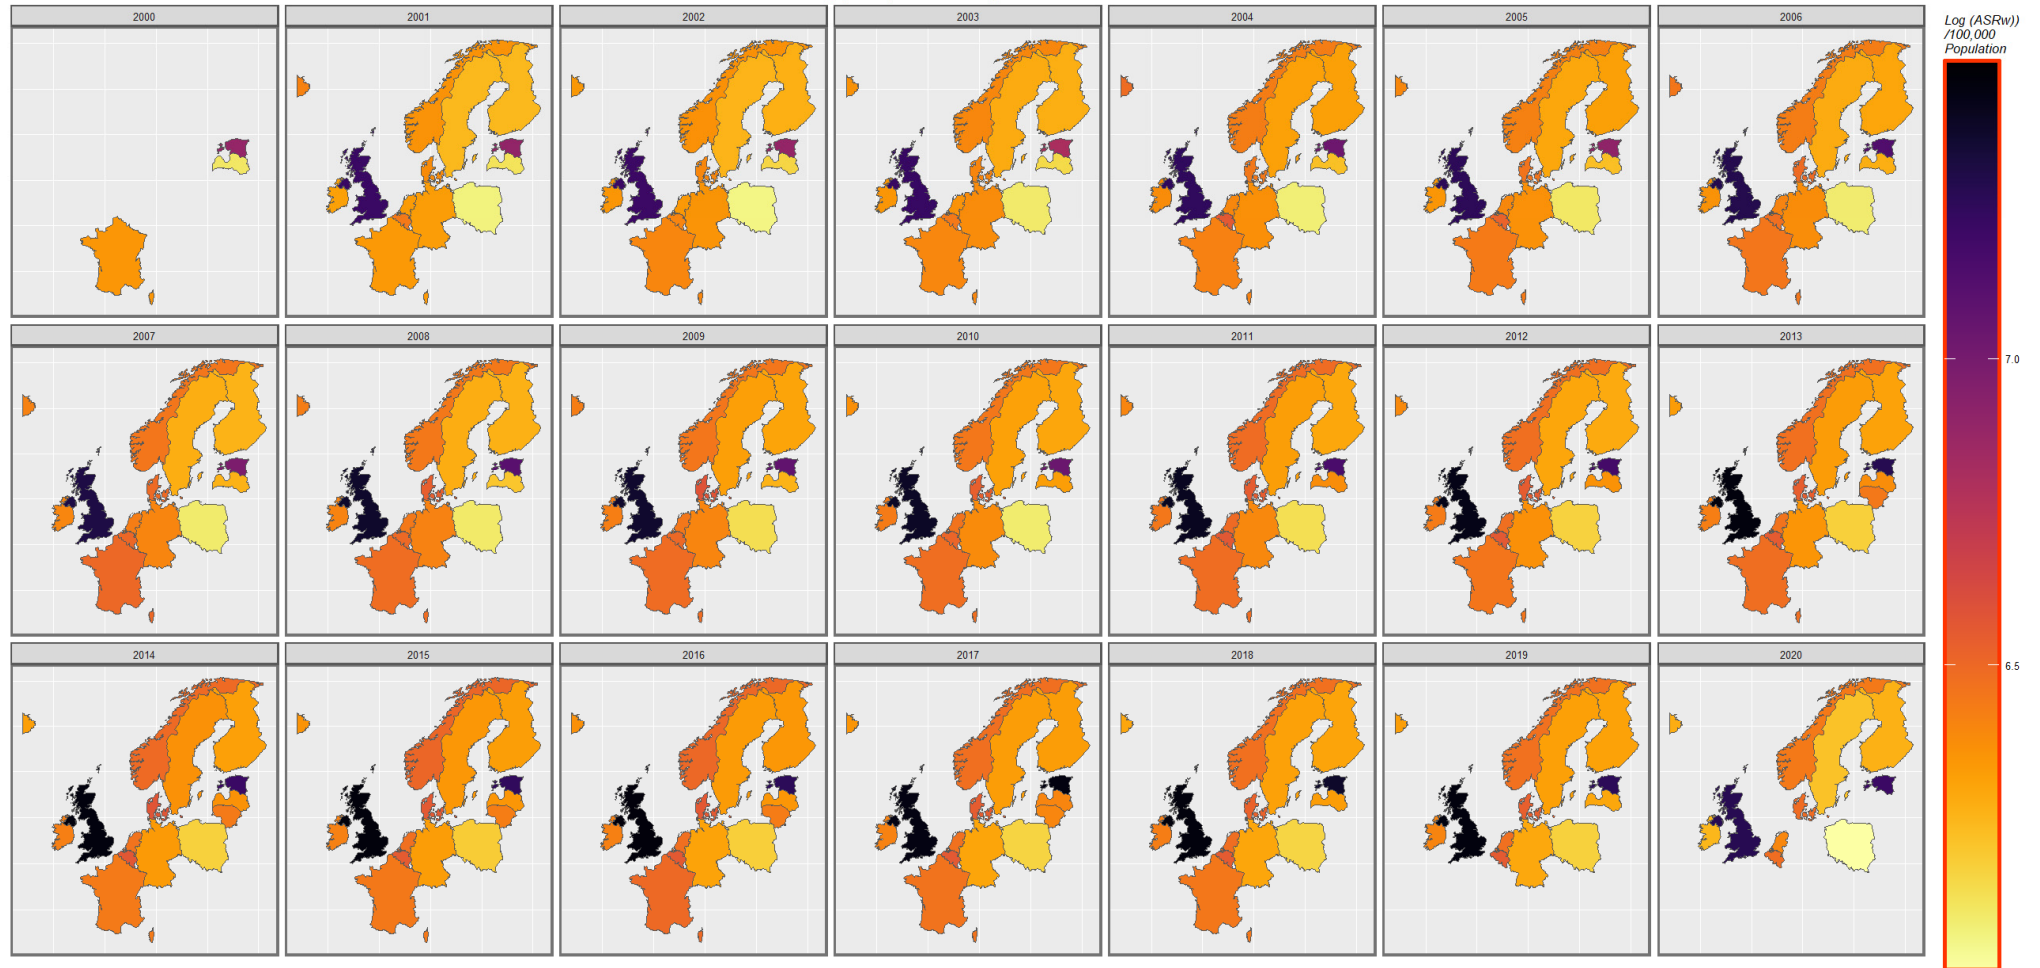

Supplementary Figure S10.: Time trends of the Log ASRw across Europe 2000-2020.

Cannabis Herb THC Concentration Across Europe Over Time

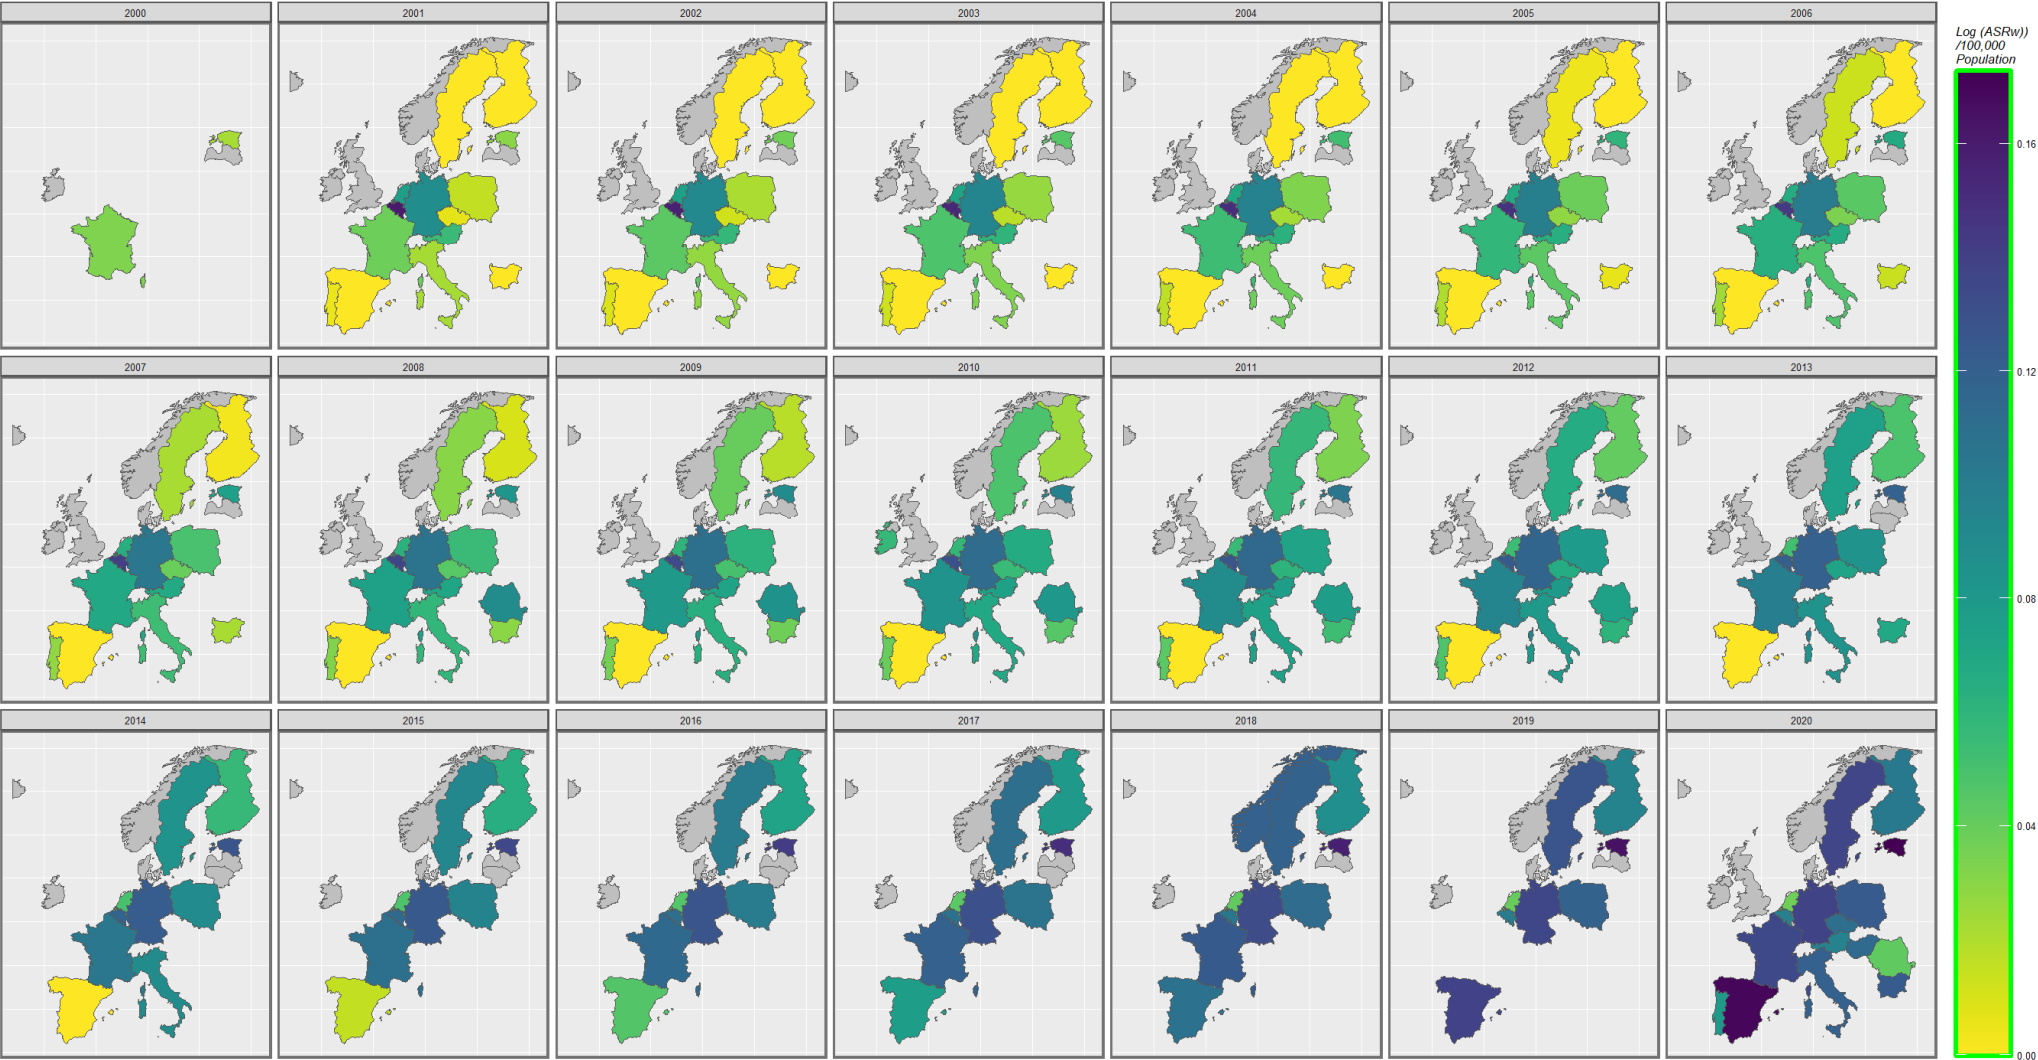

Supplementary Figure S11.: Log of All cancer Rate across Europe over time

All Cancer Log (ASRw) by Cannabis Herb THC Content Across Europe  
Bivariate Choropleth Colorplane Map

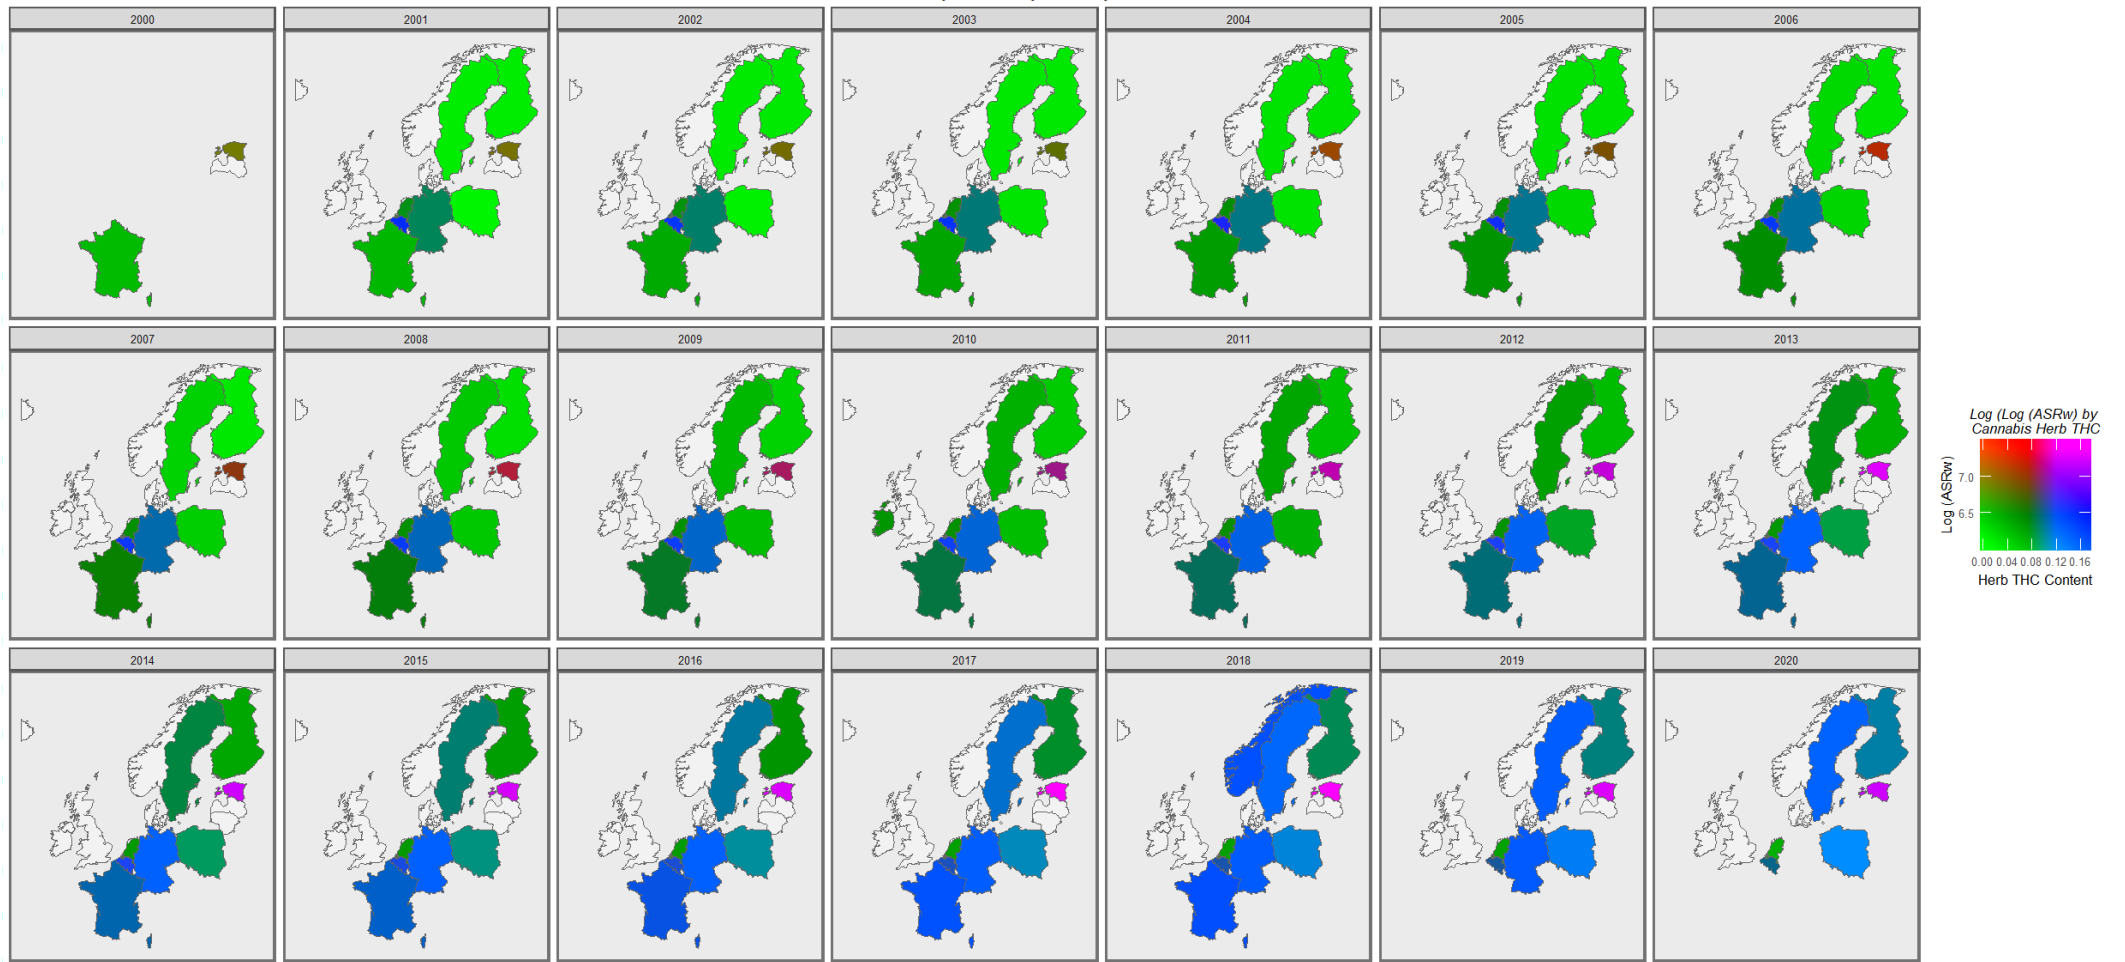

Supplementary Figure S12.: Bivariate map of All cancer rates by Log of Cannabis Herb THC Concentration Across Europe over time. Please refer to the colorplane for the interpretation of the various colour shadings. Green is where both covariates are low. Pink and purple indicates where they are both high etc.

Liver Cancer Log (ASRw) by Cannabis Herb THC Content Across Europe  
Bivariate Choropleth Colorplane Map

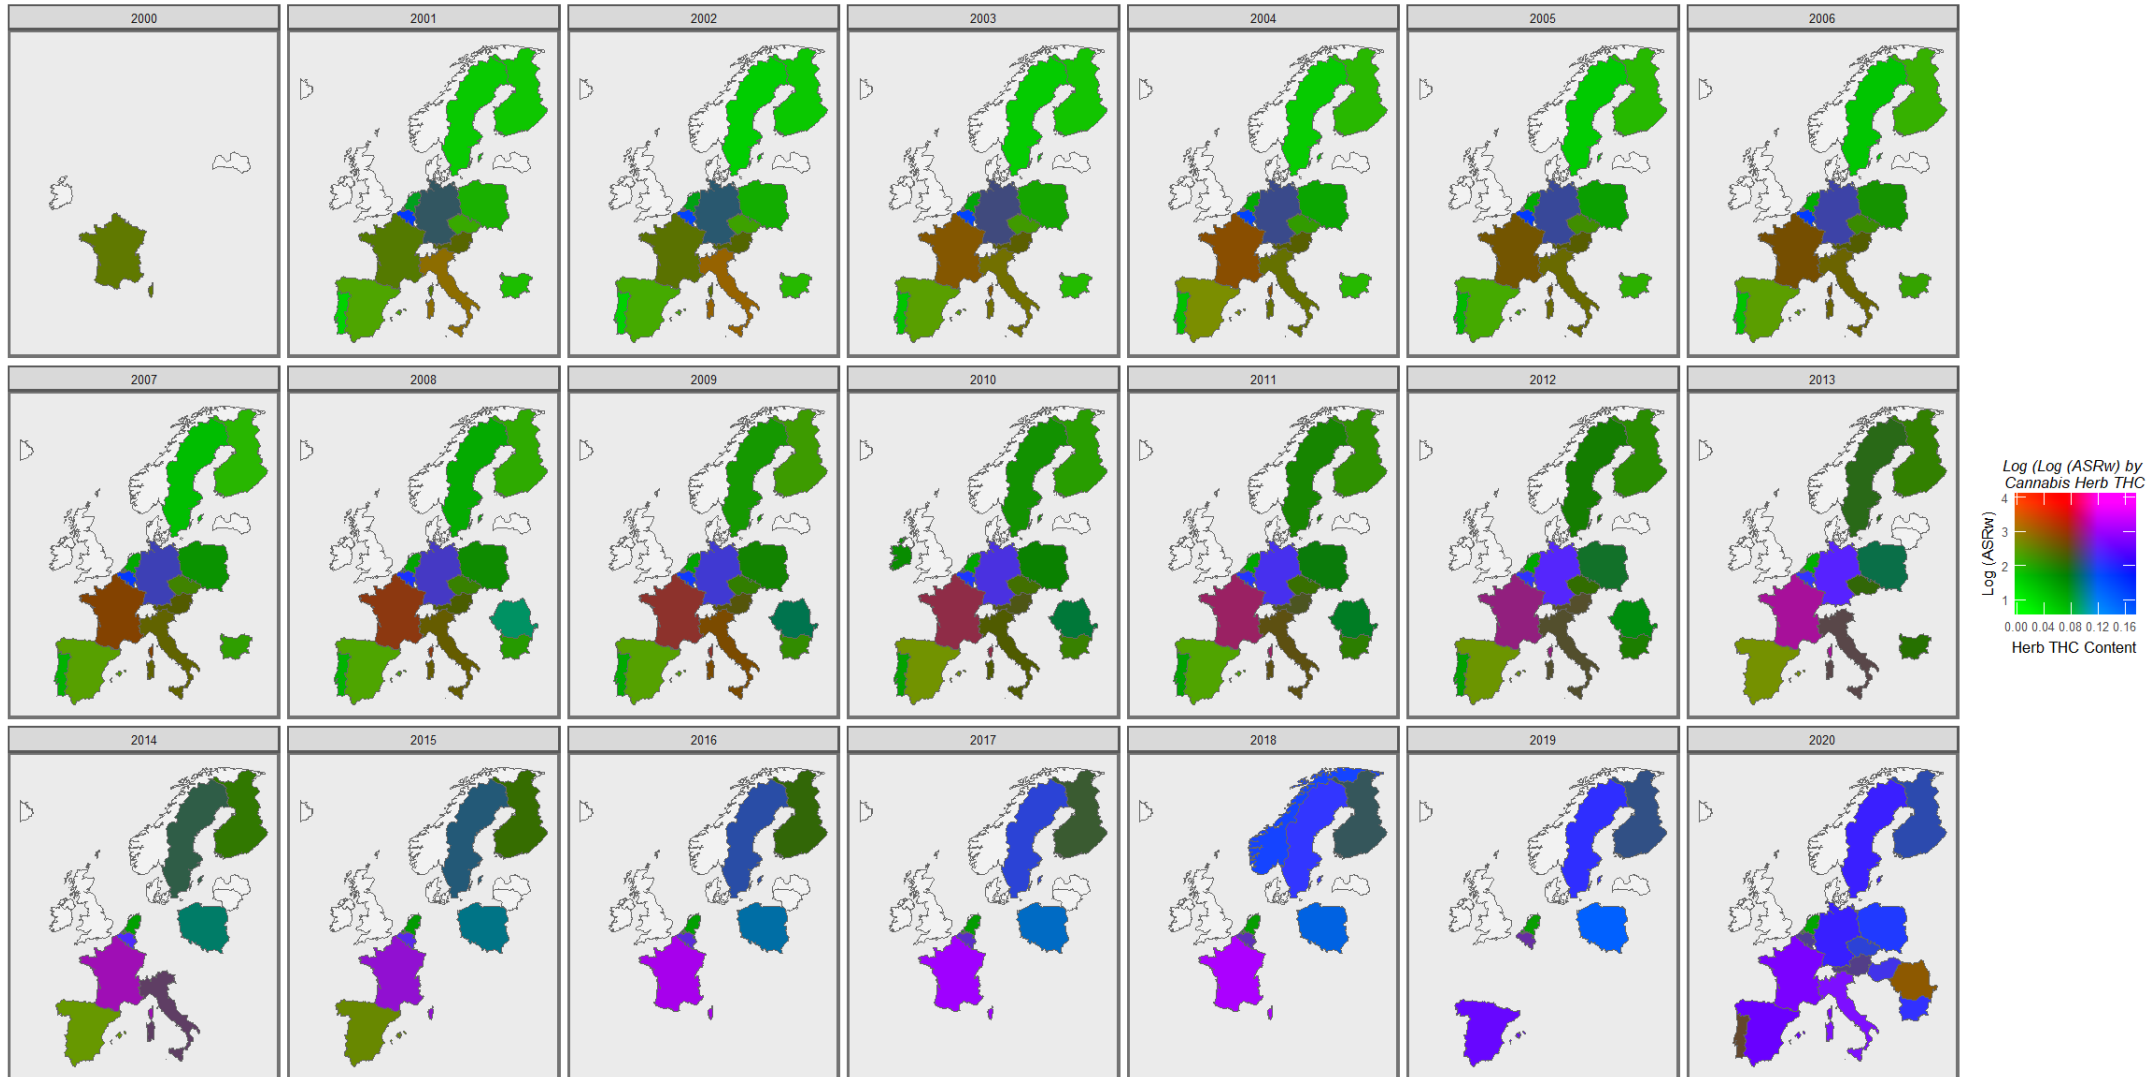

Supplementary Figure S13.: Bivariate map of Liver cancer rate by Log of Cannabis Herb THC Concentration Across Europe over time



Prostate Cancer Log (ASRw) by Cannabis Herb THC Content Across Europe  
Bivariate Choropleth Colorplane Map

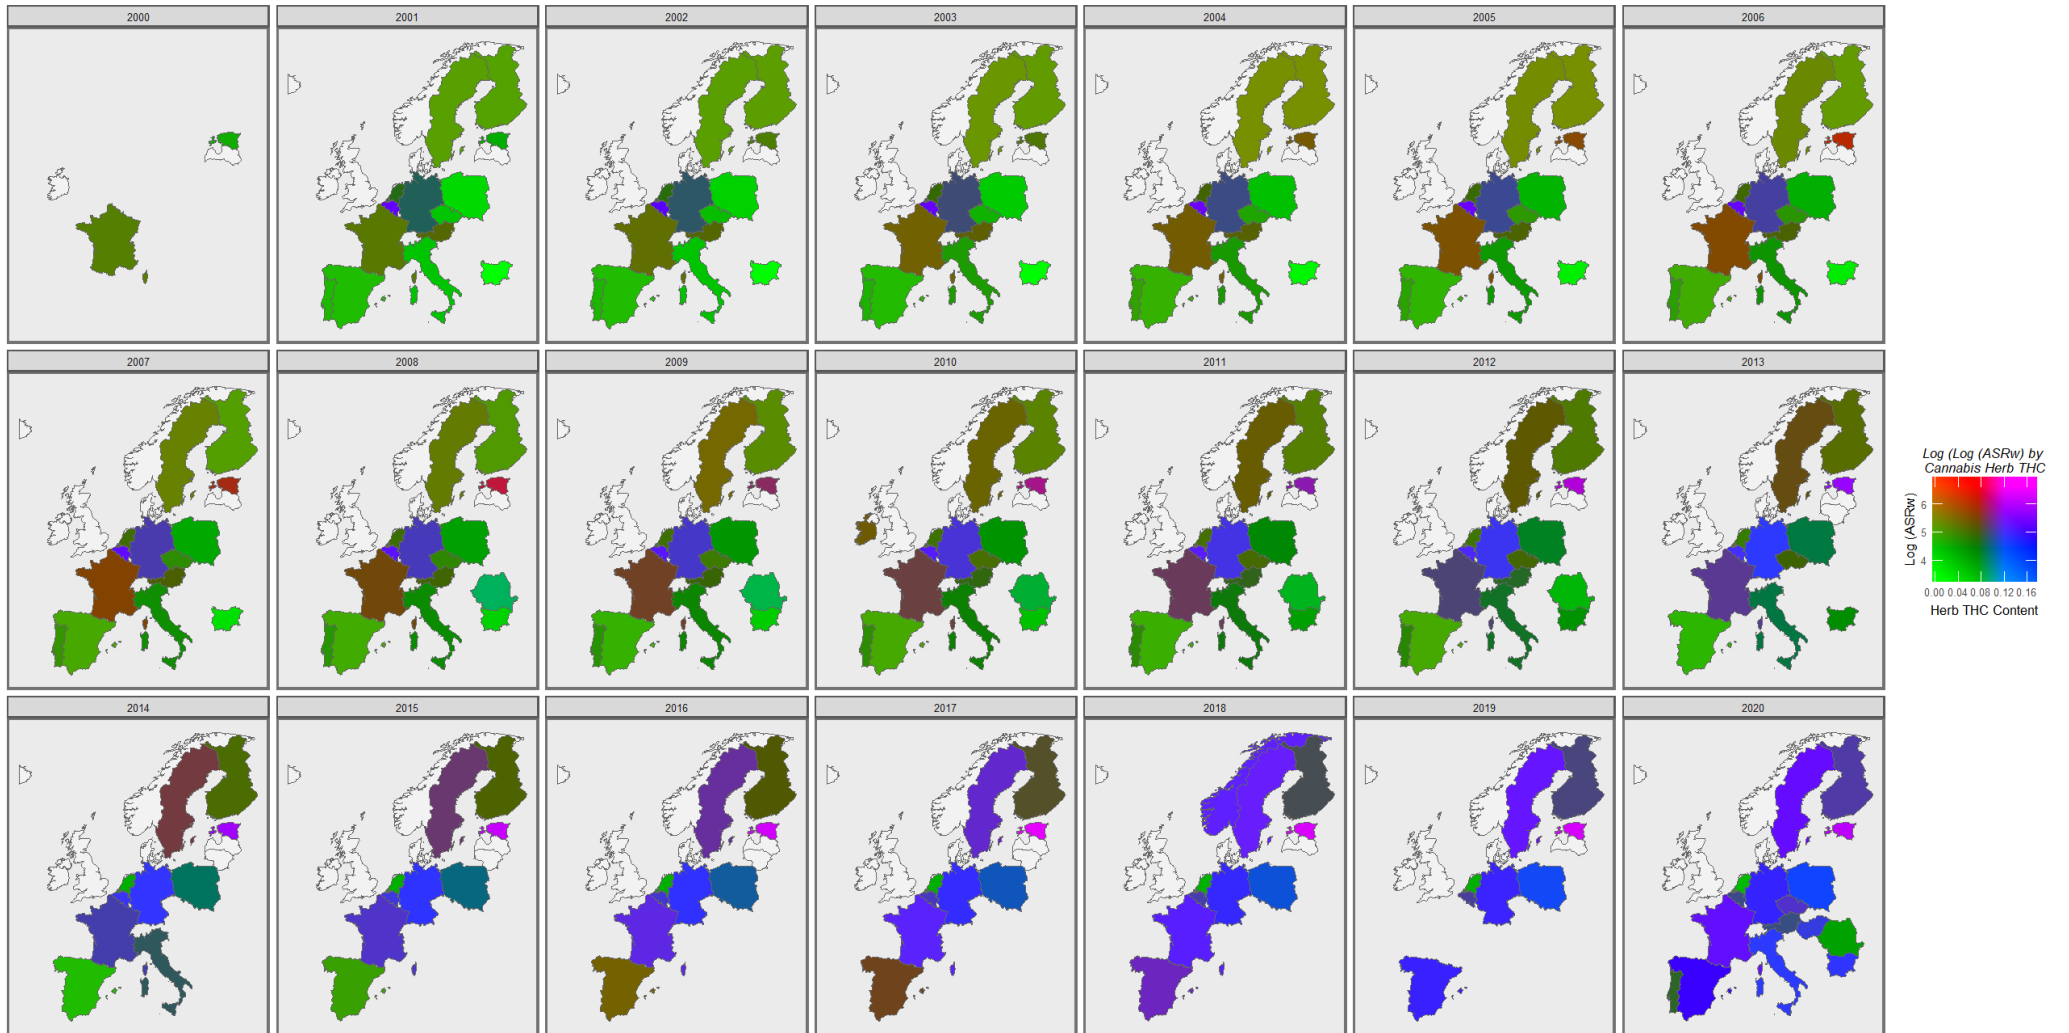

Supplementary Figure S14.: Bivariate map of Prostate cancer rate by Log of Cannabis Herb THC Concentration Across Europe over time

Colorectum Cancer Log (ASRw) by Cannabis Herb THC Content Across Europe  
Bivariate Choropleth Colorplane Map

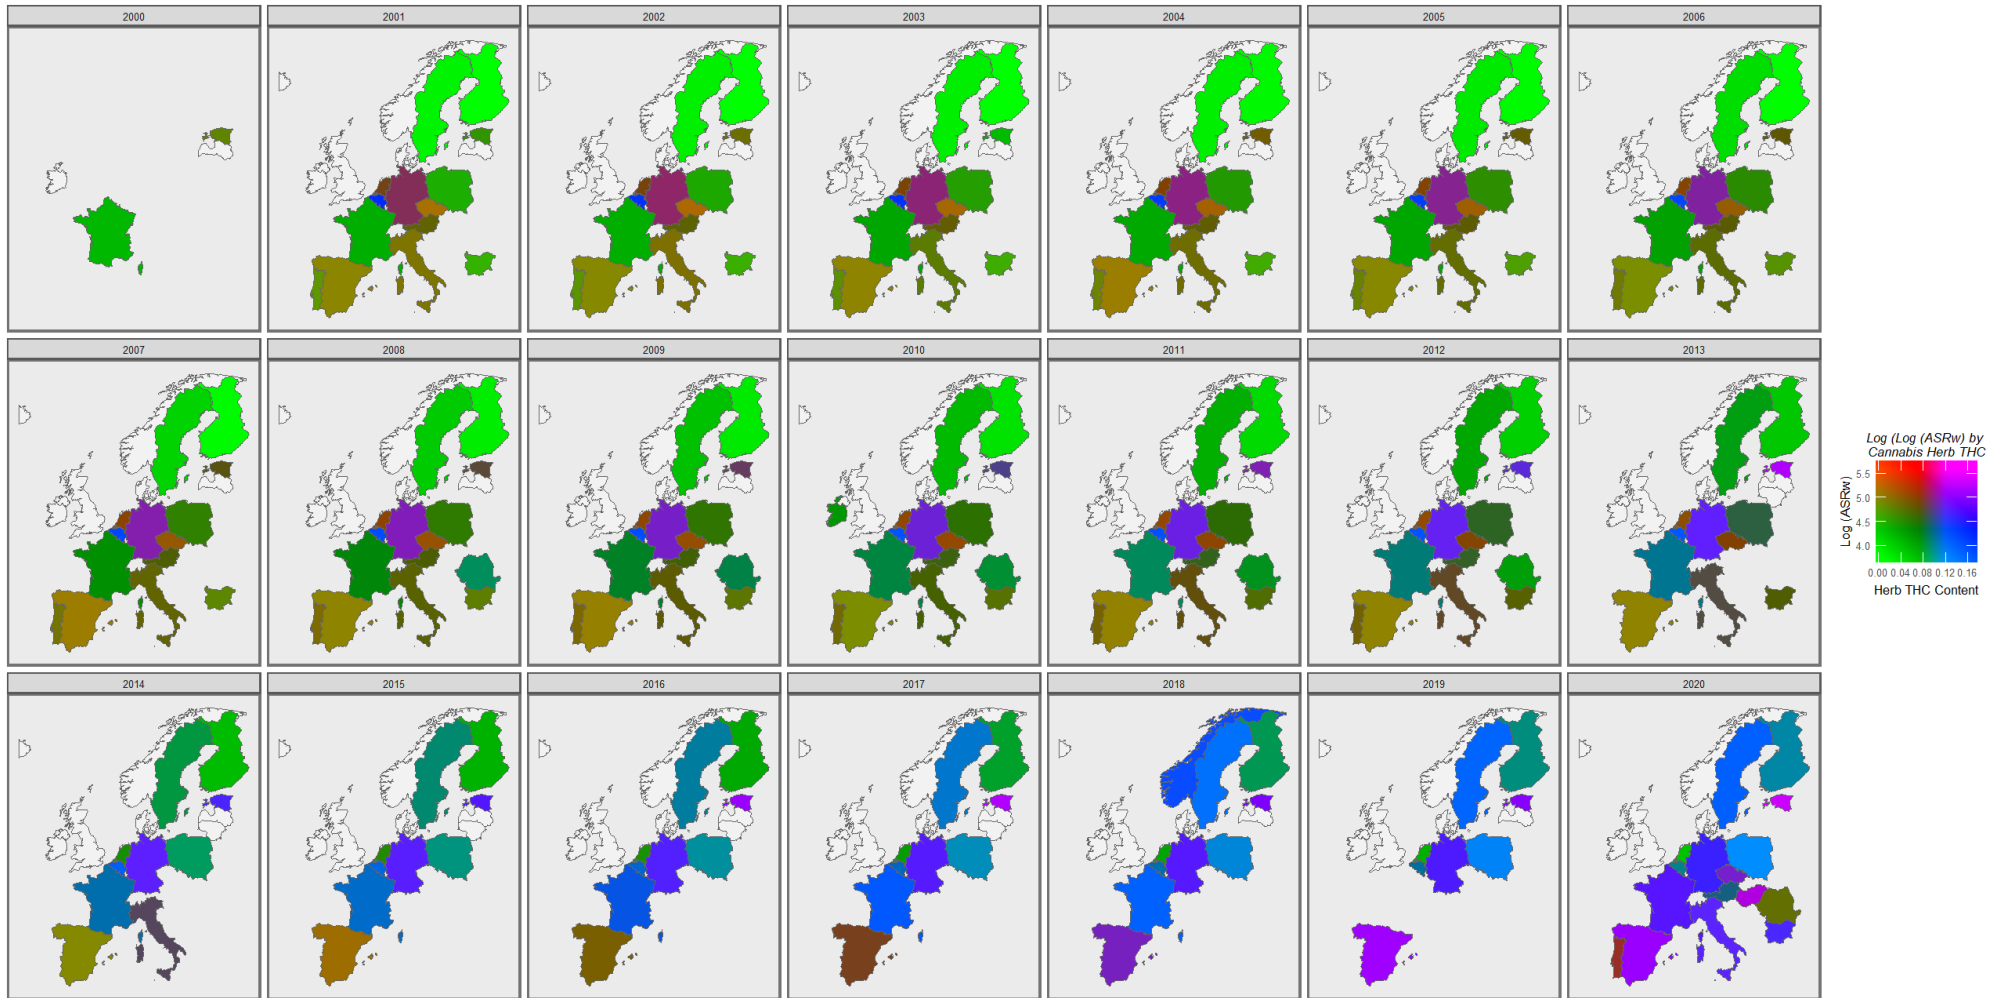

Supplementary Figure S15.: The bivariate relationship between cannabis herb THC content and colorectal cancers.

Lung Cancer Log (ASRw) by Cannabis Herb THC Content Across Europe  
Bivariate Choropleth Colorplane Map

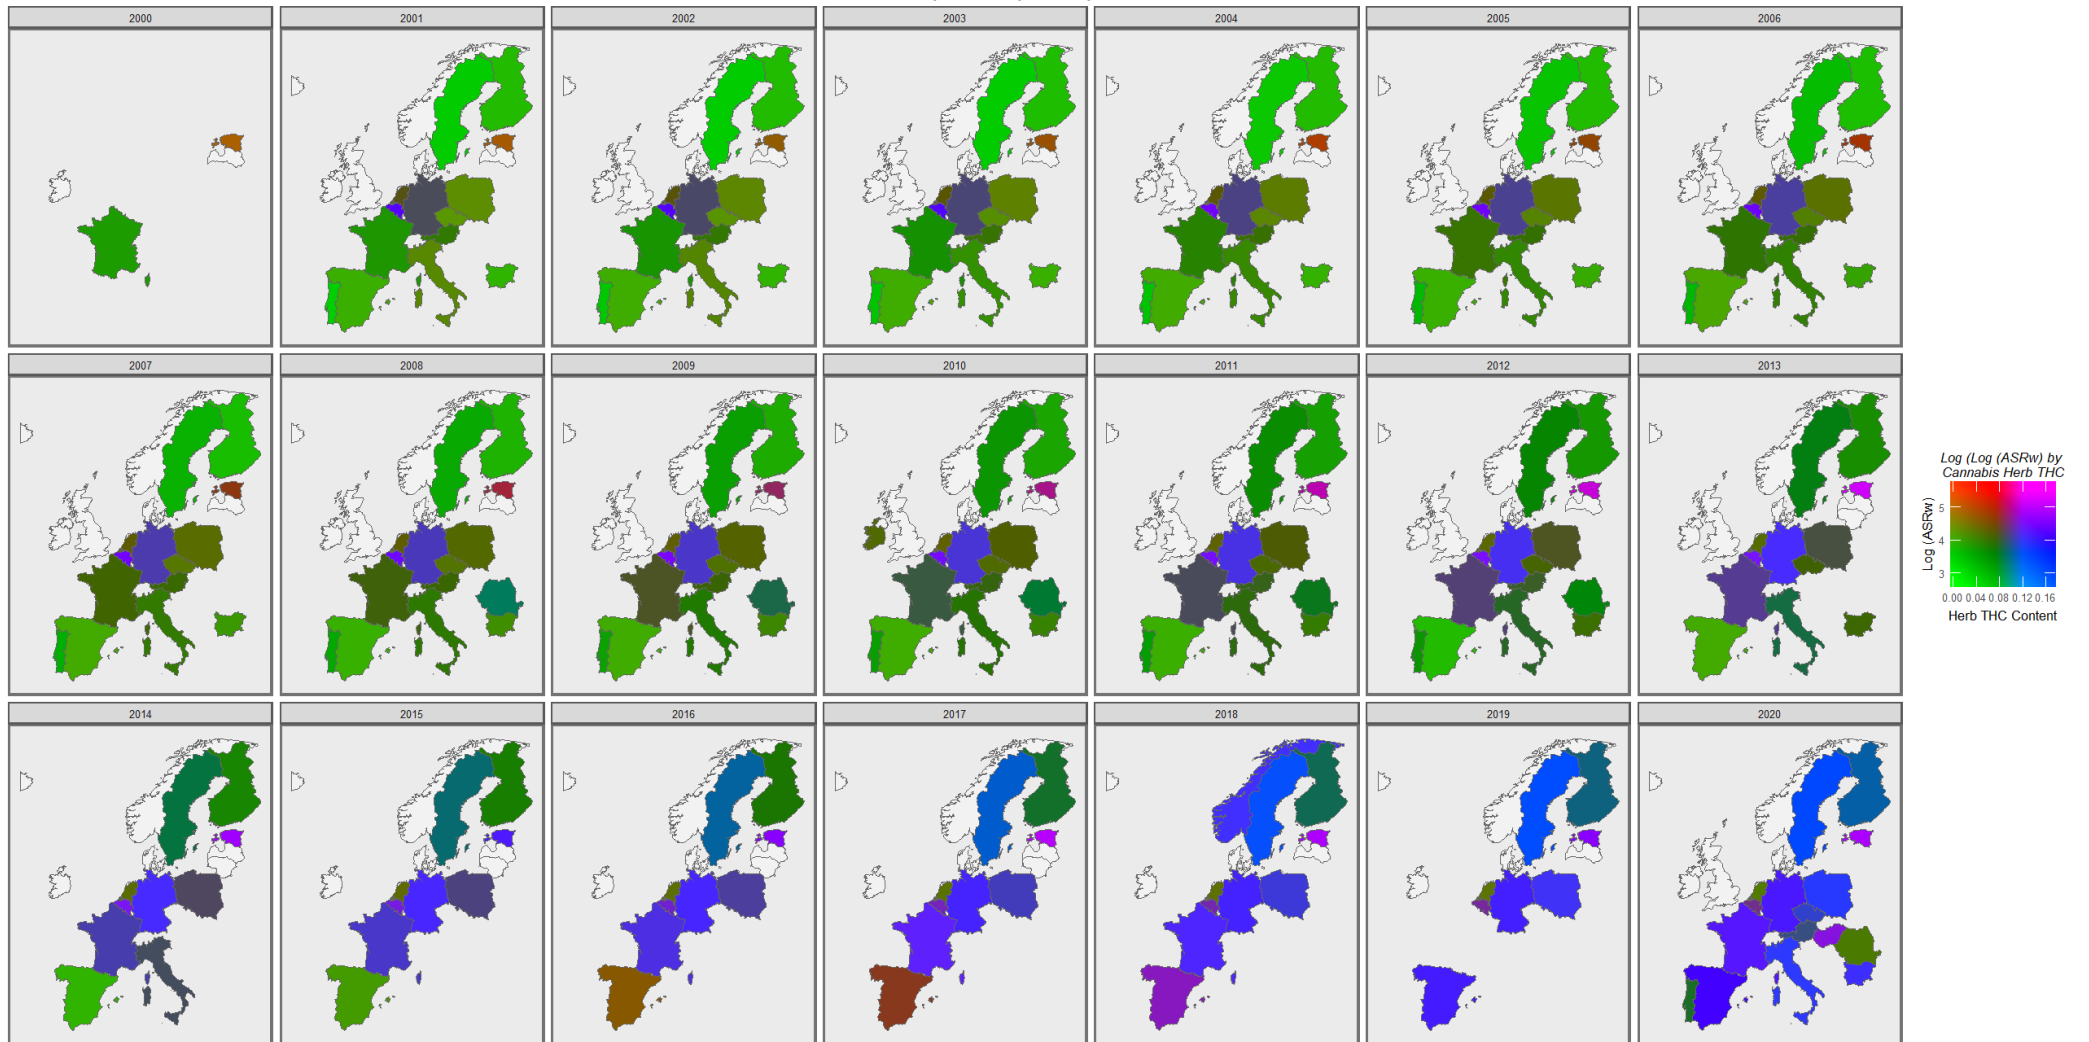

Supplementary Figure S16.: The bivariate relationship between cannabis herb THC content and lung cancers.

Non-Hodgkins Lymphoma Log (ASRw) by Cannabis Herb THC Content Across Europe  
Bivariate Choropleth Colorplane Map

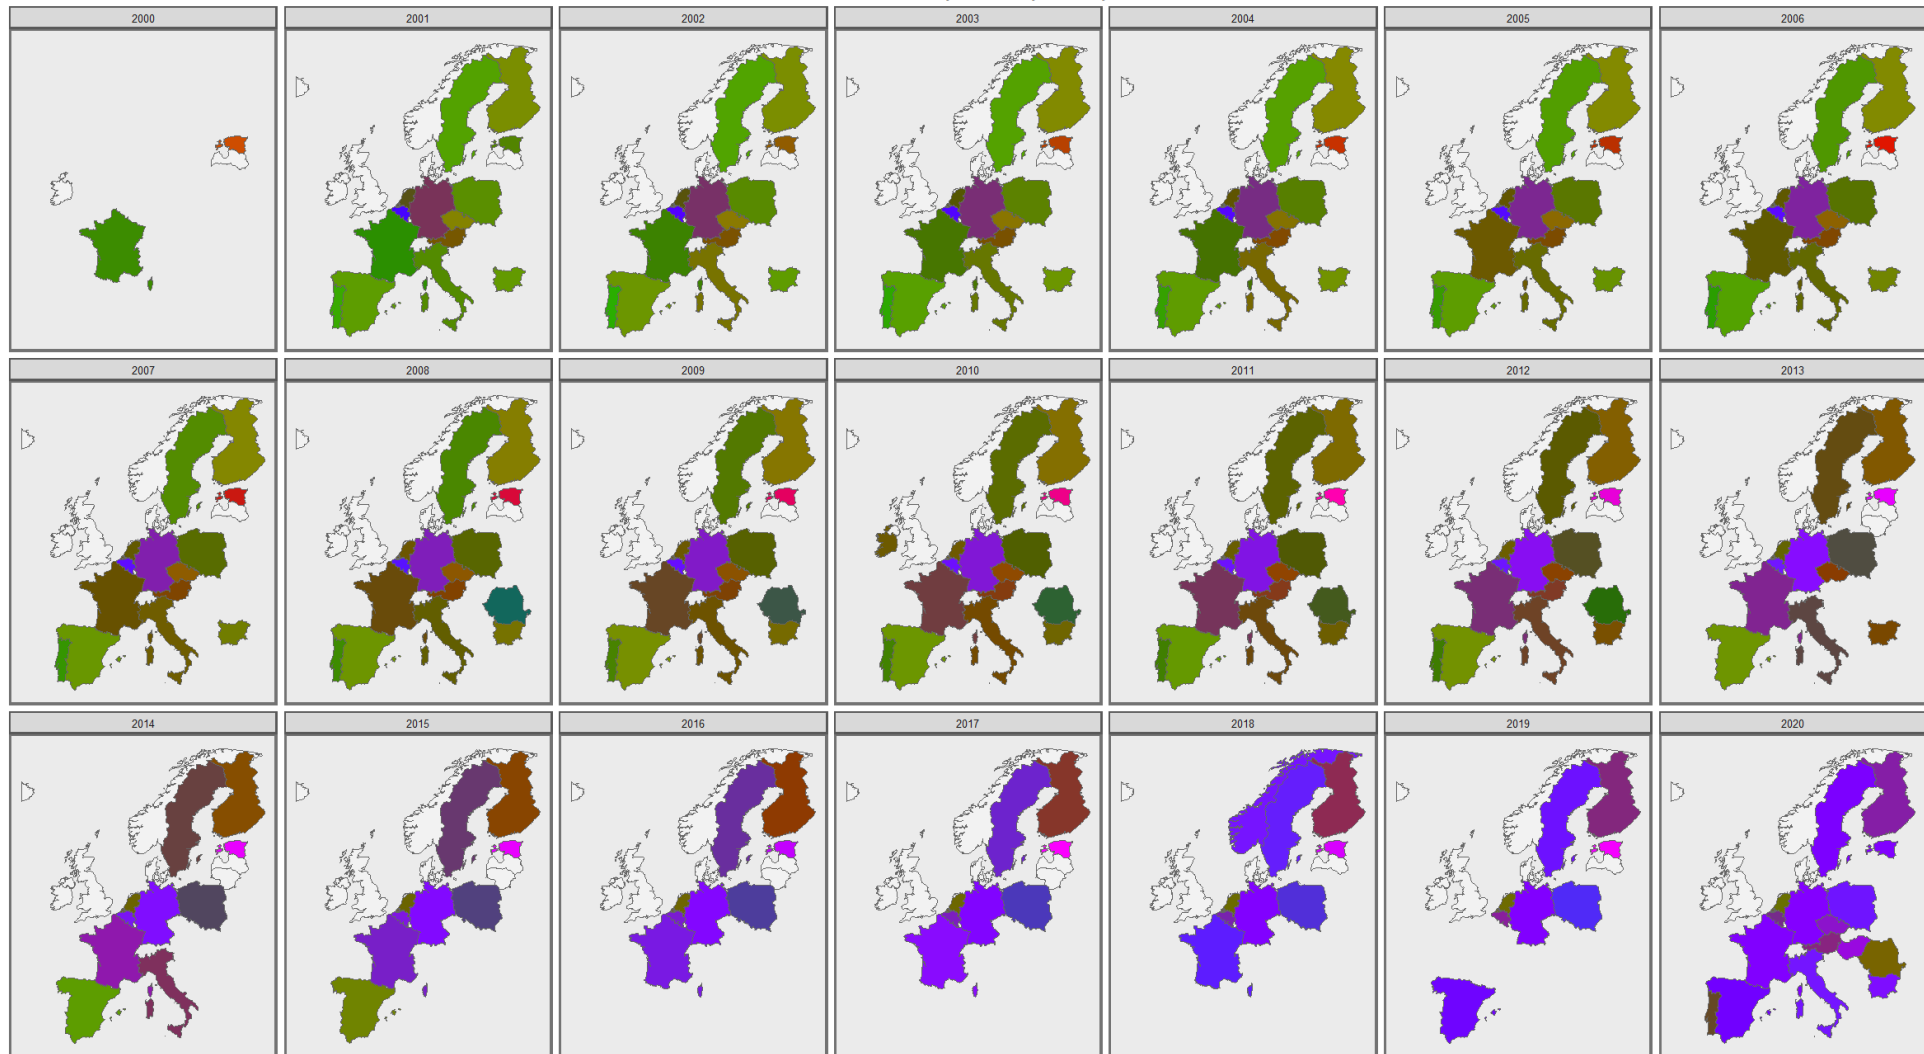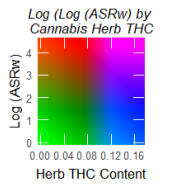

Supplementary Figure S17.: The bivariate relationship between cannabis herb THC content and rate of Non-Hodgkins Lymphoma.



Lymphoid Leukaemia Log (ASRw) by Cannabis Herb THC Content Across Europe  
Bivariate Choropleth Colorplane Map

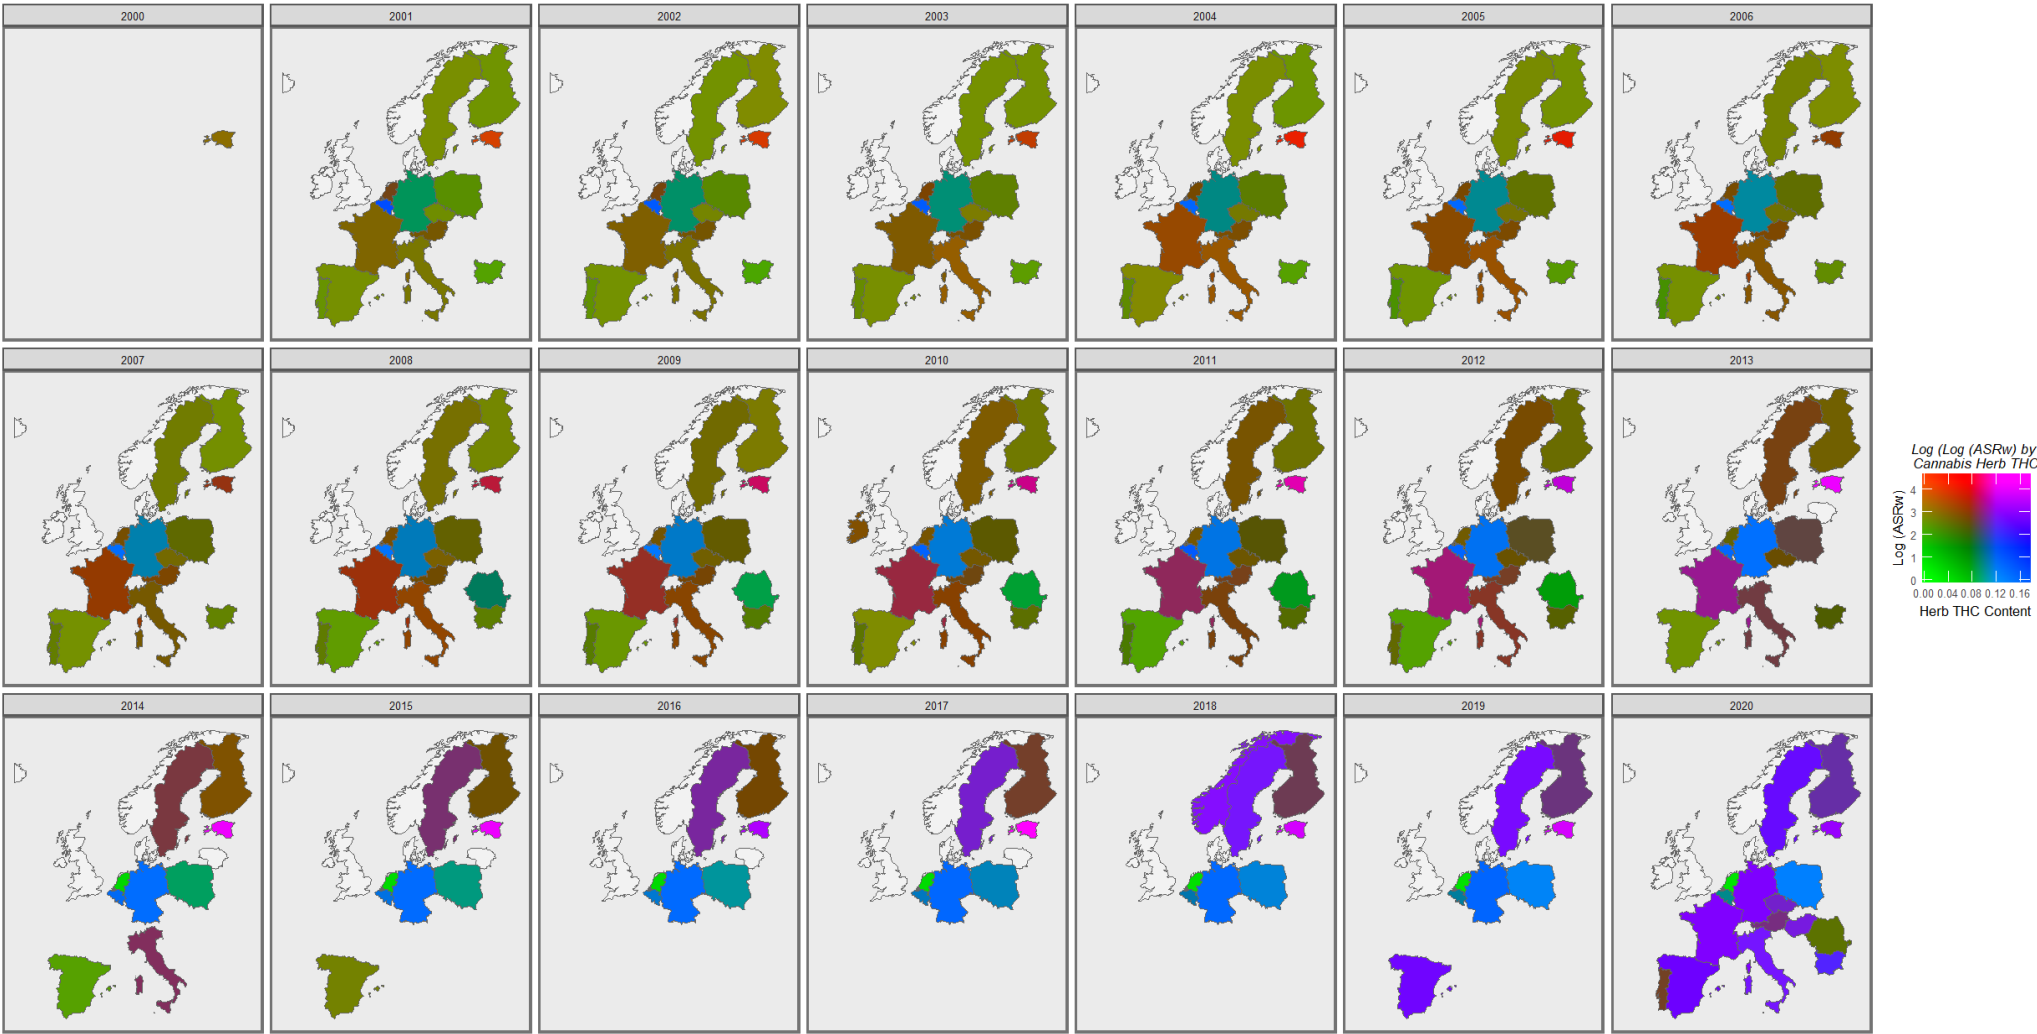

Supplementary Figure S18.: The bivariate relationship between cannabis herb THC content and lymphoid leukaemias.

Vulva Cancer Log (ASRw) by Cannabis Herb THC Content Across Europe  
Bivariate Choropleth Colorplane Map

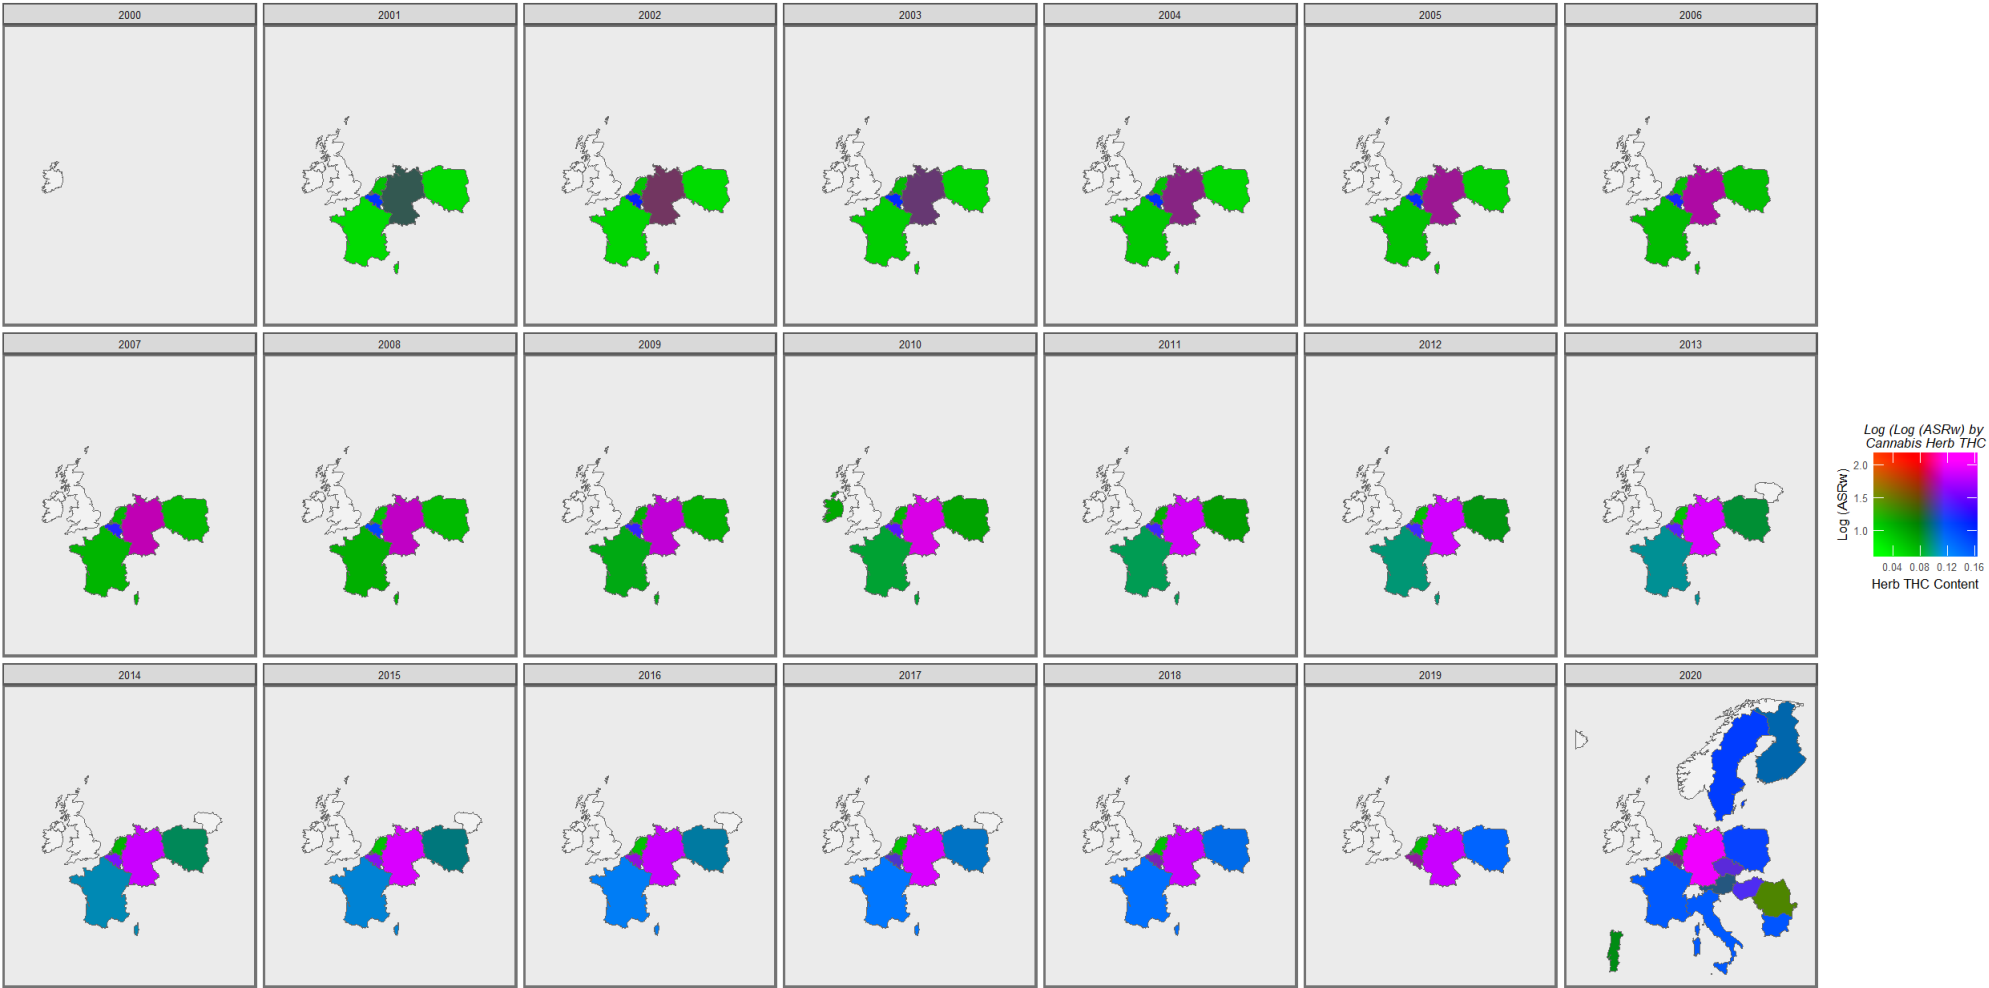

Supplementary Figure S19.: The bivariate relationship between cannabis herb THC content and vulva cancer.

Log (ASRw) by Cancer by Daily Cannabis Use Status,  
- Comdbf11DateRxSlp ~ HiLo

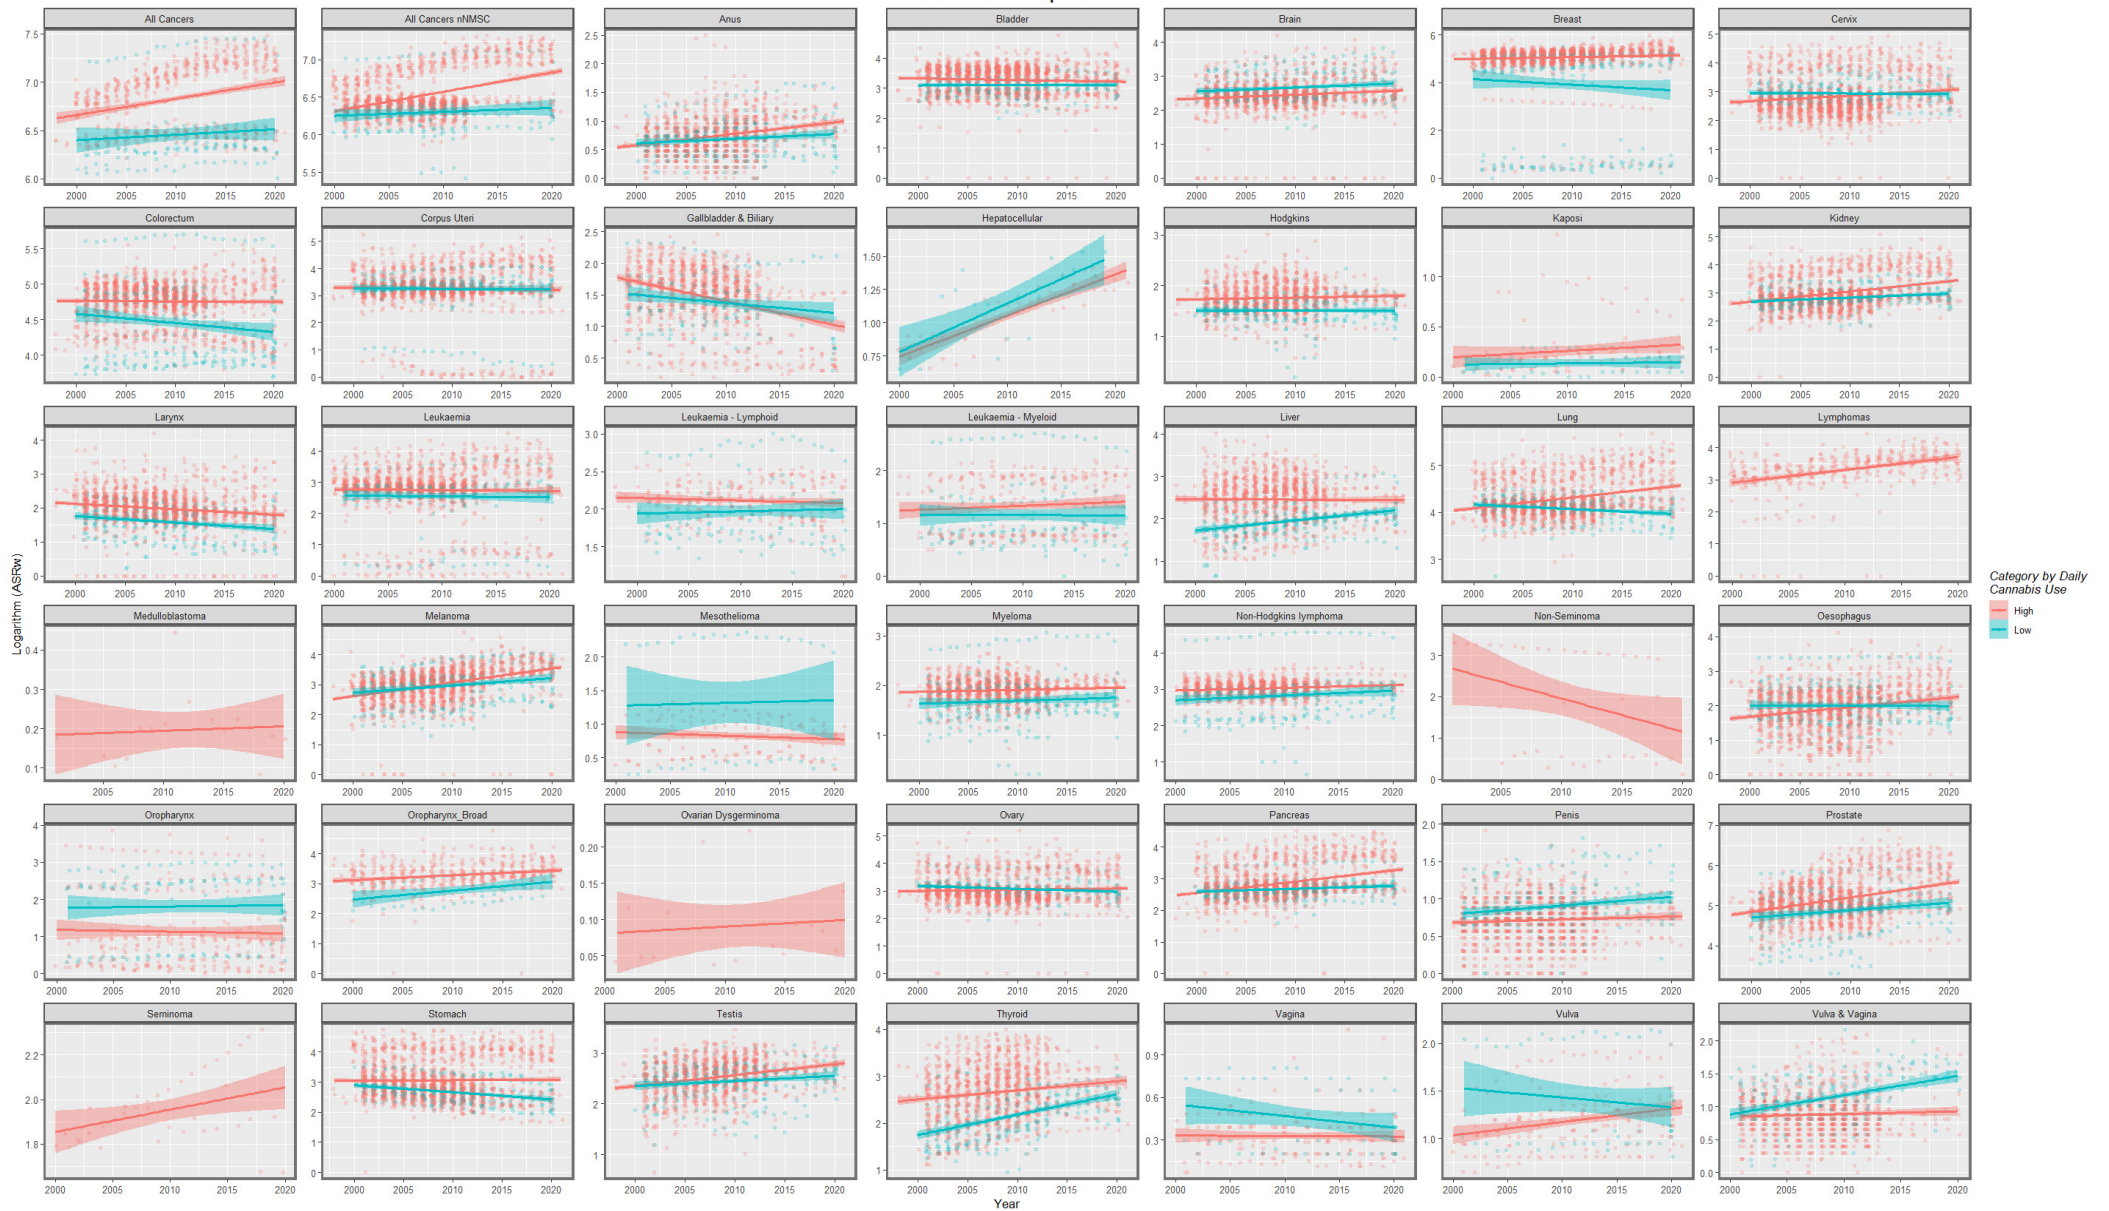

Supplementary Figure S20.: Log Rate of Selected Cancers over time by high and low cannabis use nations. (See text for details.)

Comparative Age Standardized Cancer Rates by Cannabis Exposure Group

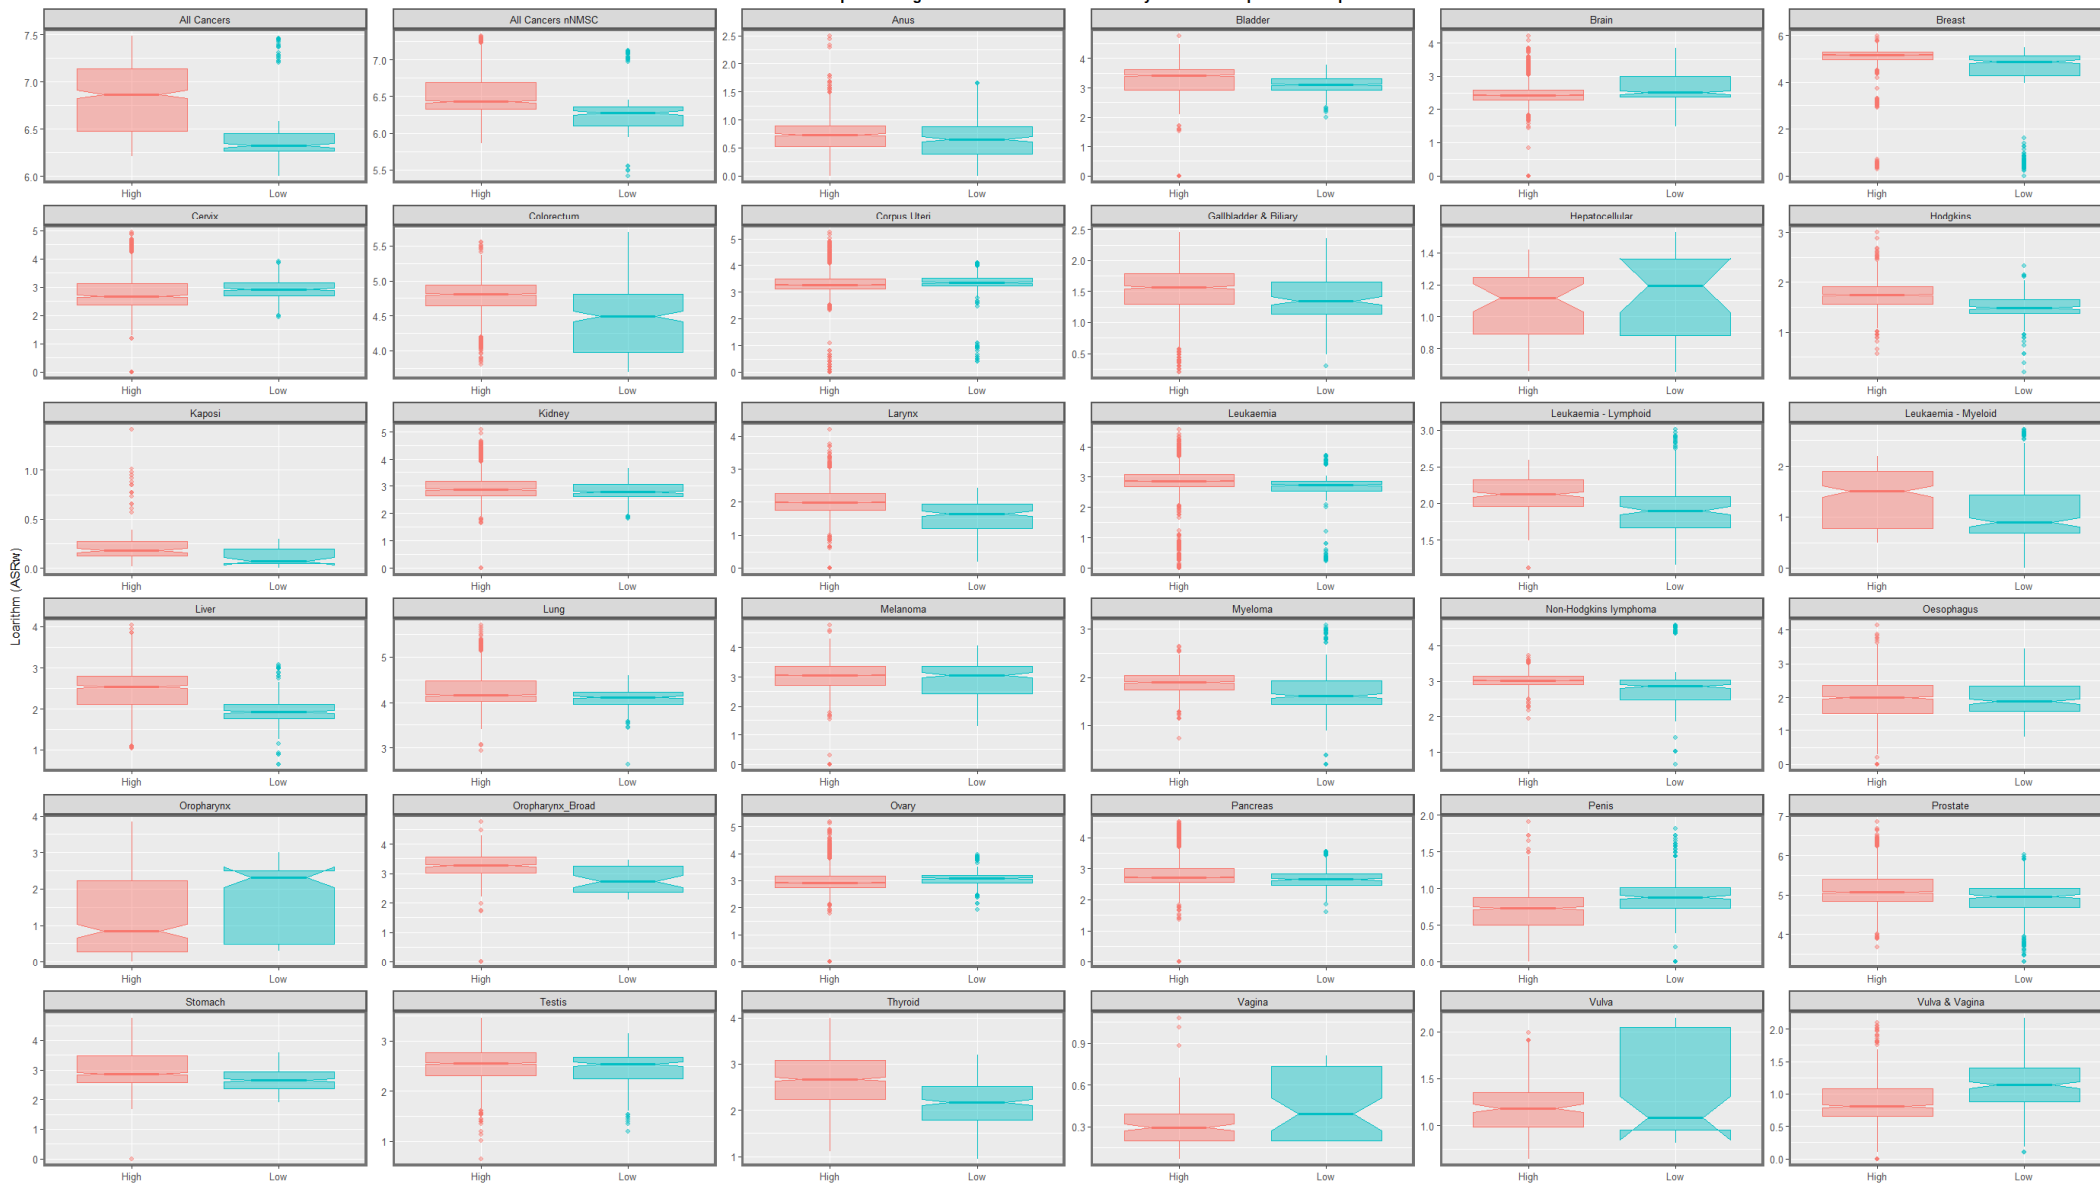

Supplementary Figure S21.: Serial Boxplots Log Rate of Selected Cancers aggregated across time by high and low cannabis use nations. (See text for details.)



Comparative Age Standardized Cancer Rates by Cannabis Exposure Group

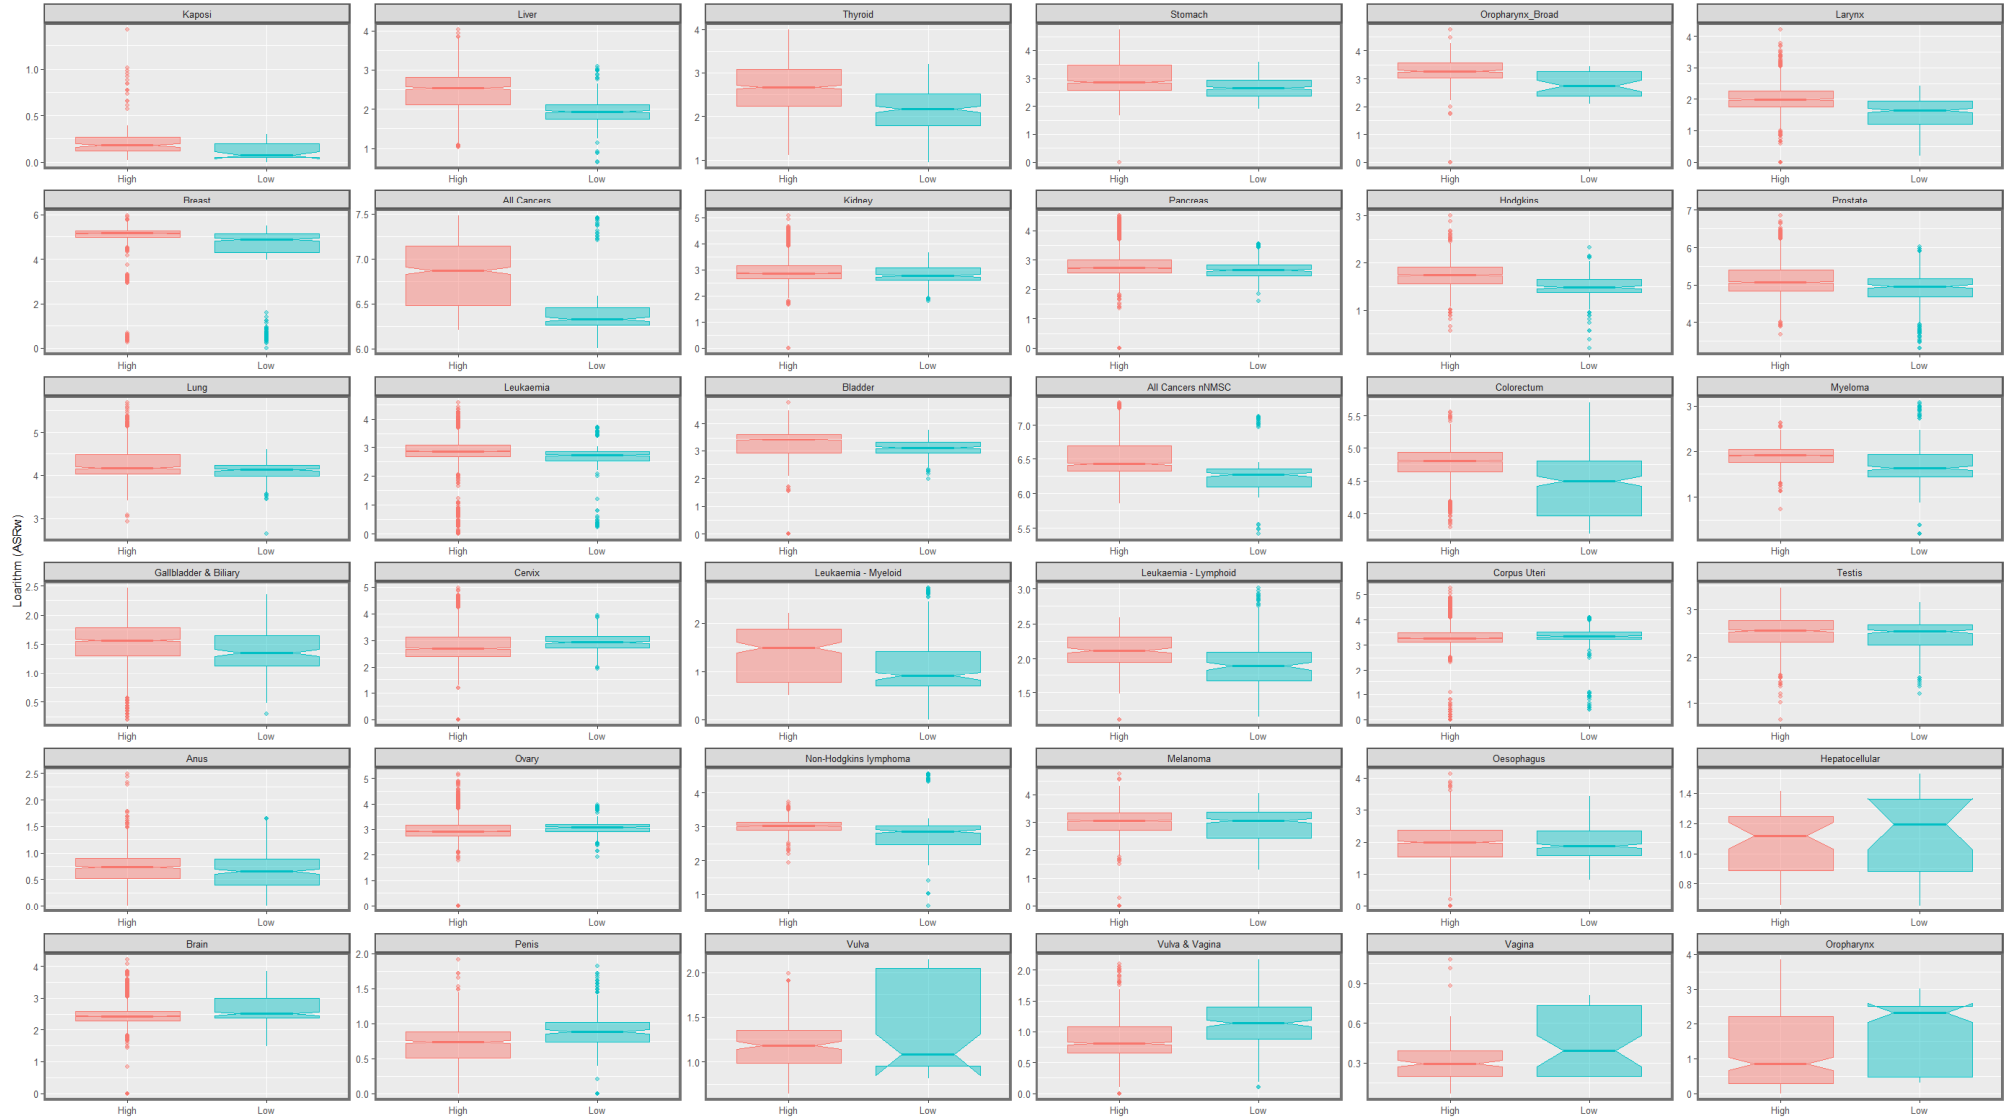

Supplementary Figure S22.: Pannelled boxplot of the aggregated rates of various cancers ordered by the ratio between the rates in the high cannabis use group and that in the low cannabis use group.

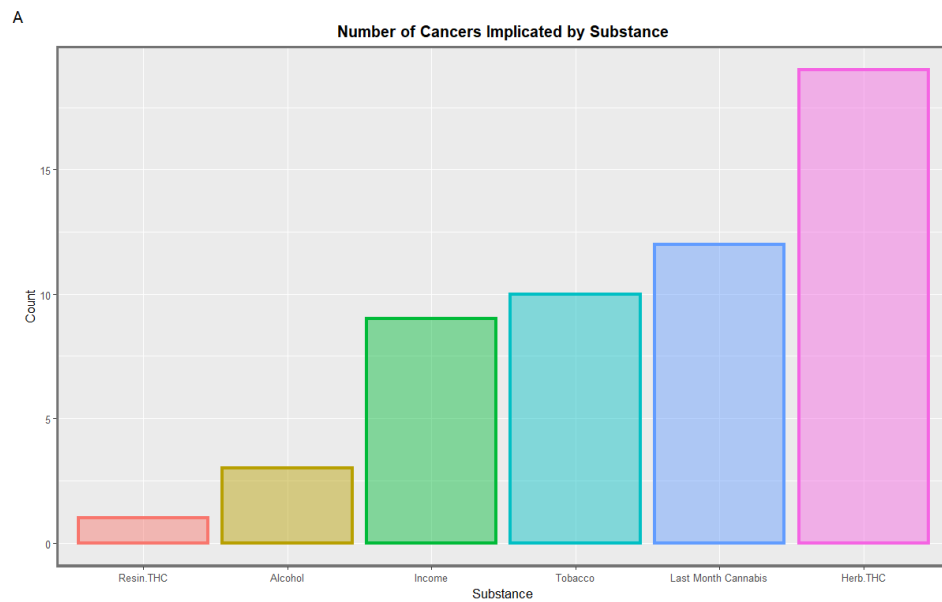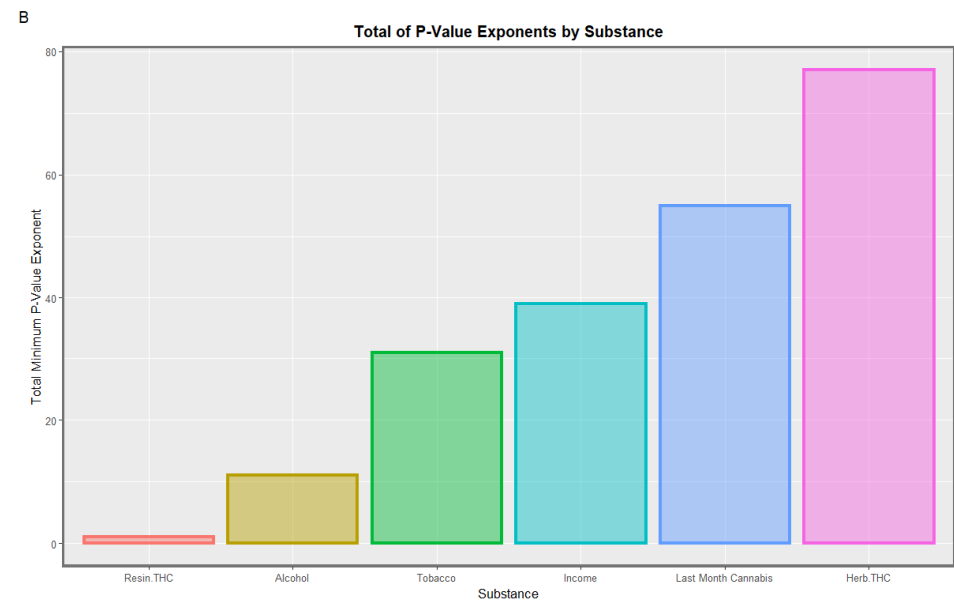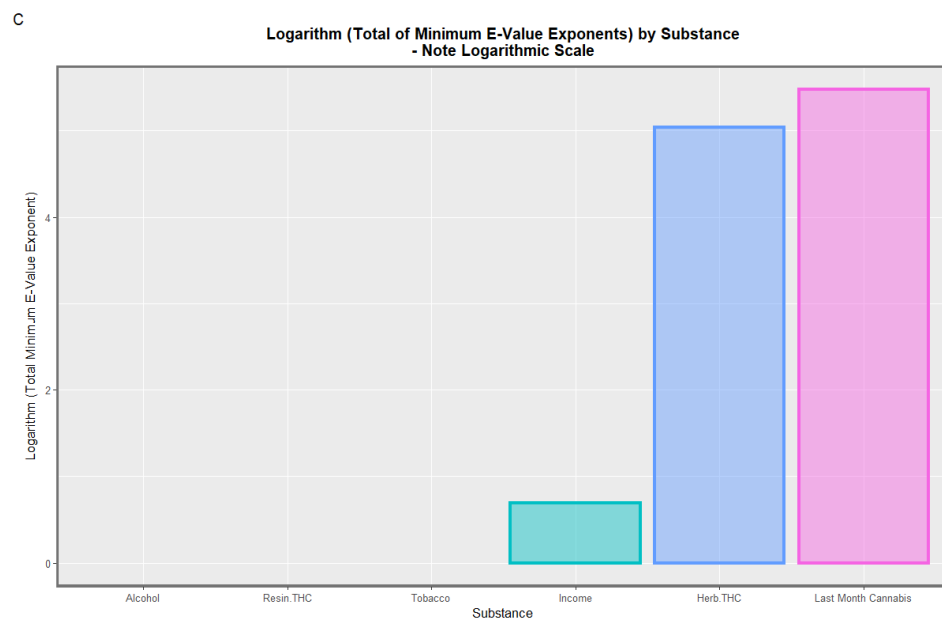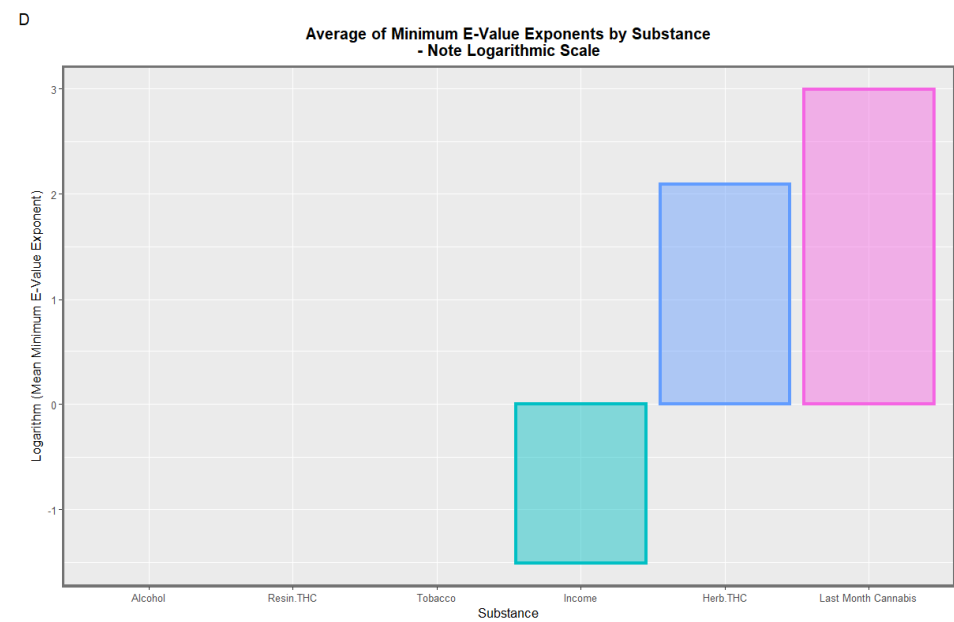

Supplementary Figure S23.: Summary plots of the additive mixed effects regression. (A) number of cancer implicated by substance, (B) the total value of the negative exponents of the P-values, (C) the sum of the exponents of the minimum P-values and (D) the average of the exponents of the minimum P-values.

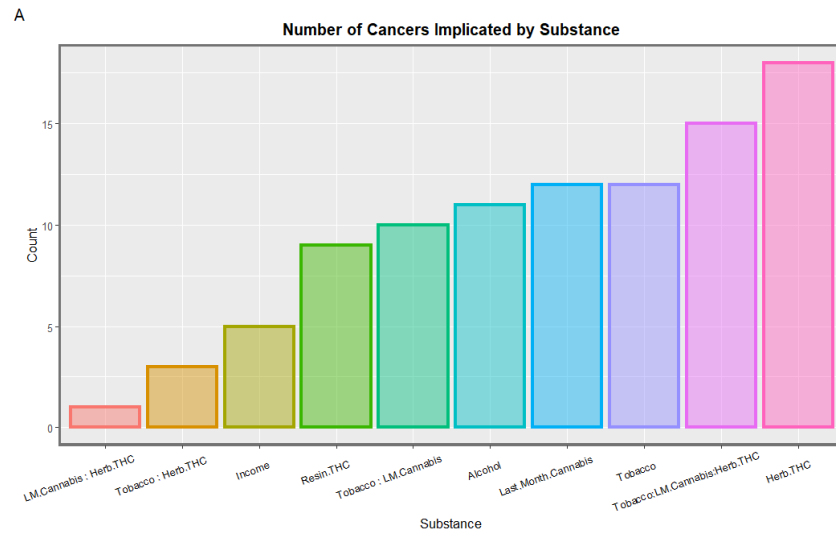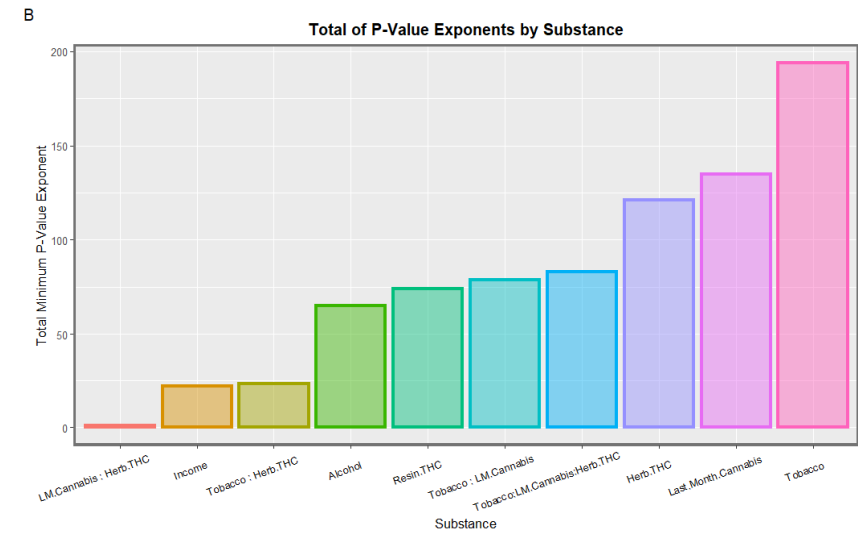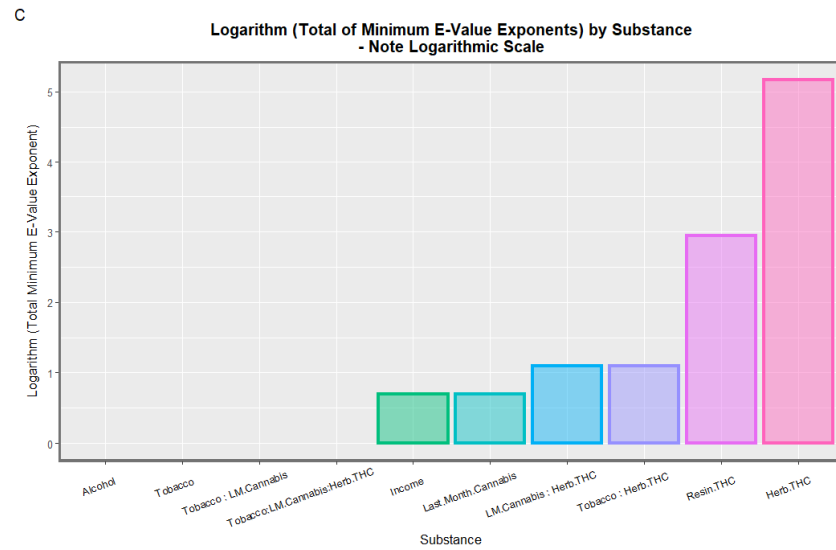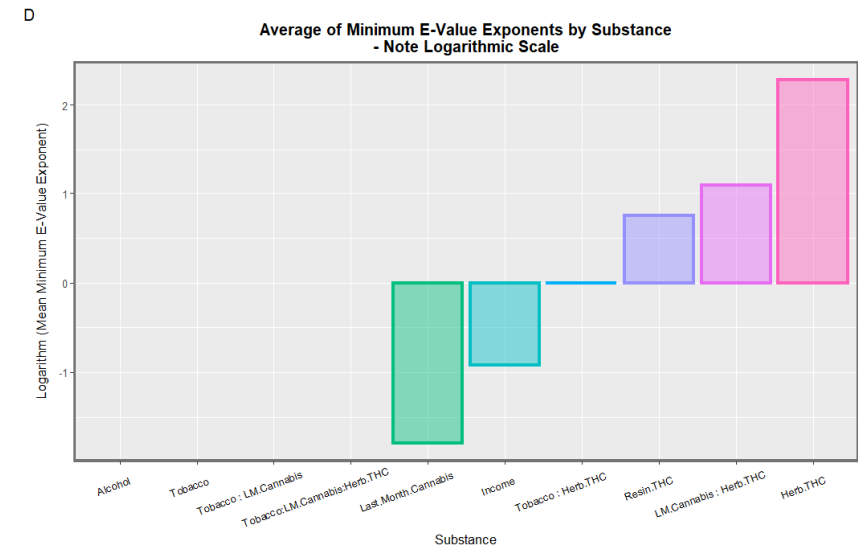

Supplementary Figure S24.: Graphical summary of interactive panel model at two years of lag.

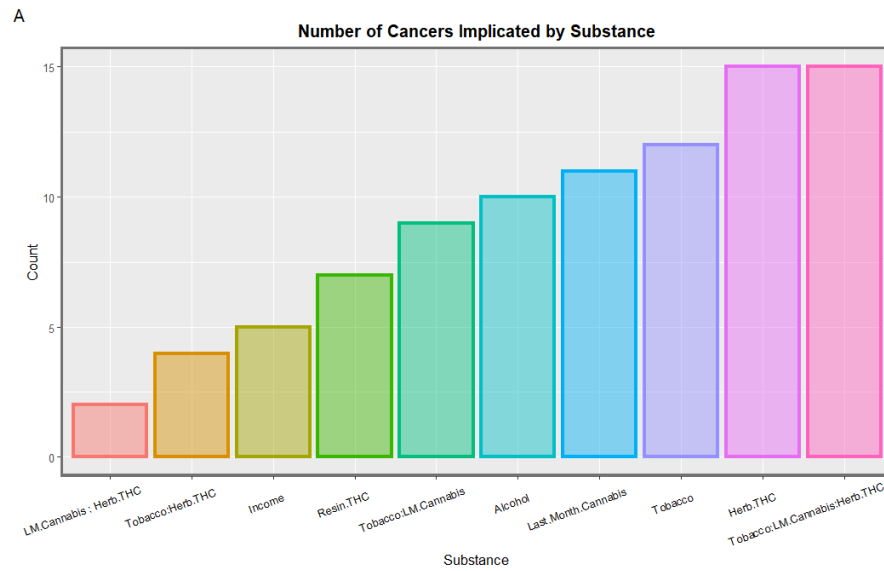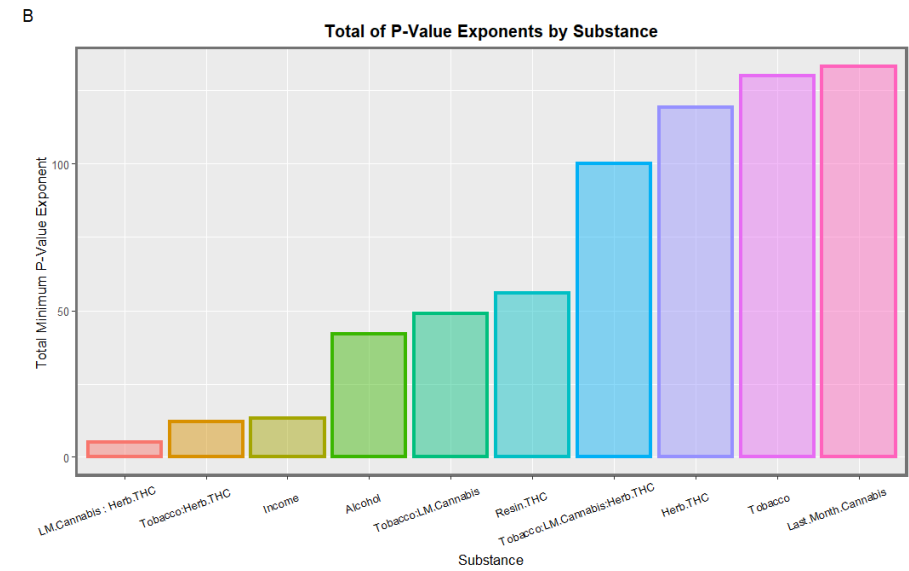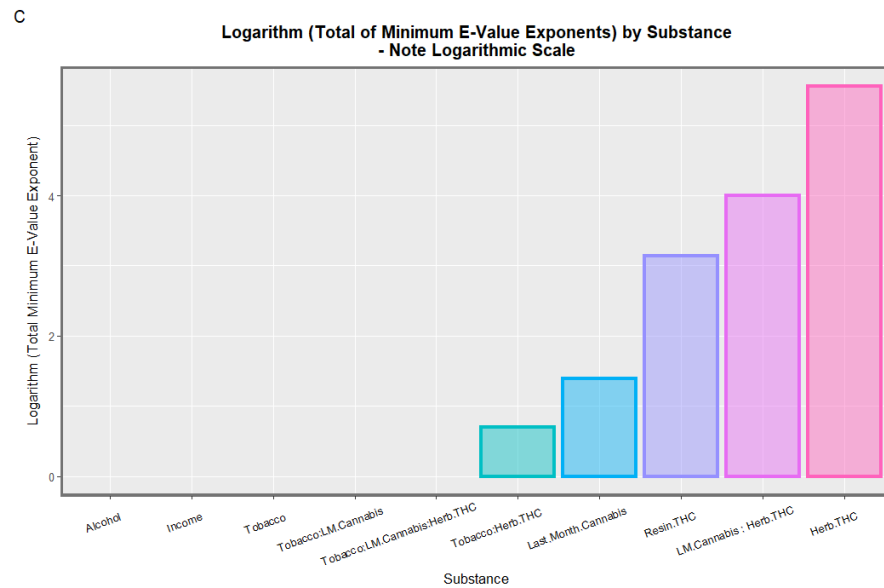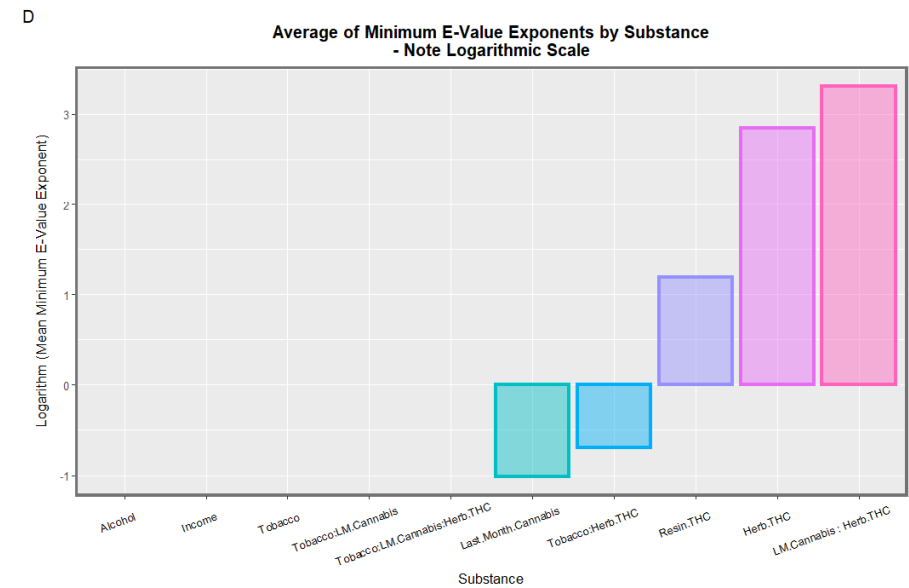

Supplementary Figure S25.: Graphical summary of interactive panel model at four years of lag.



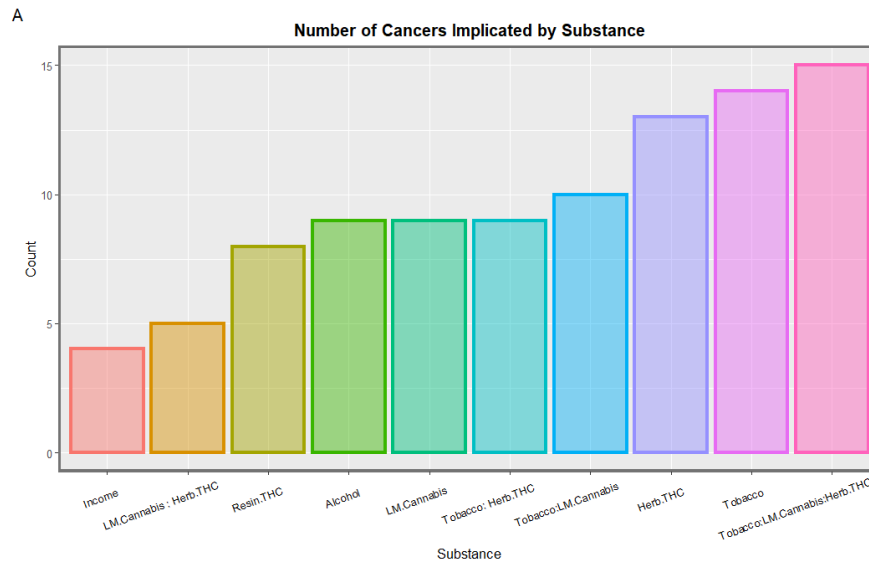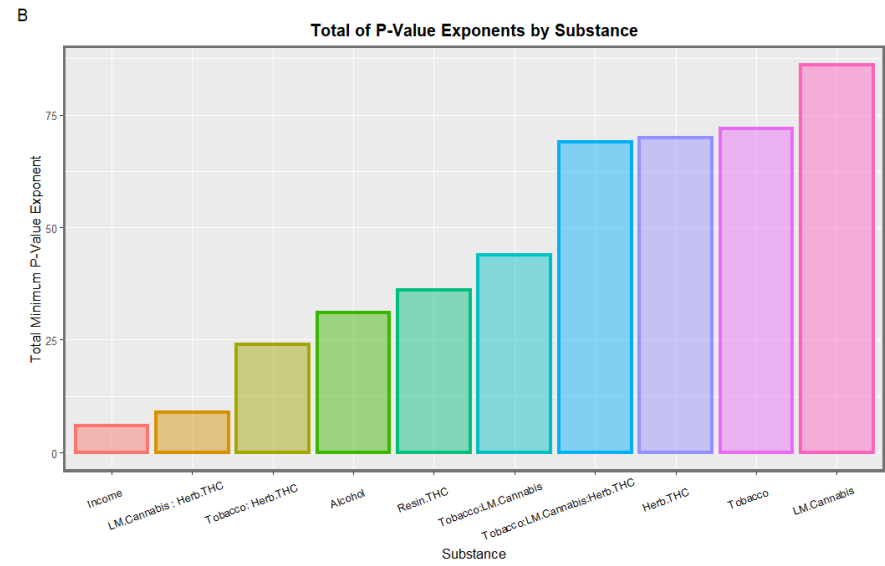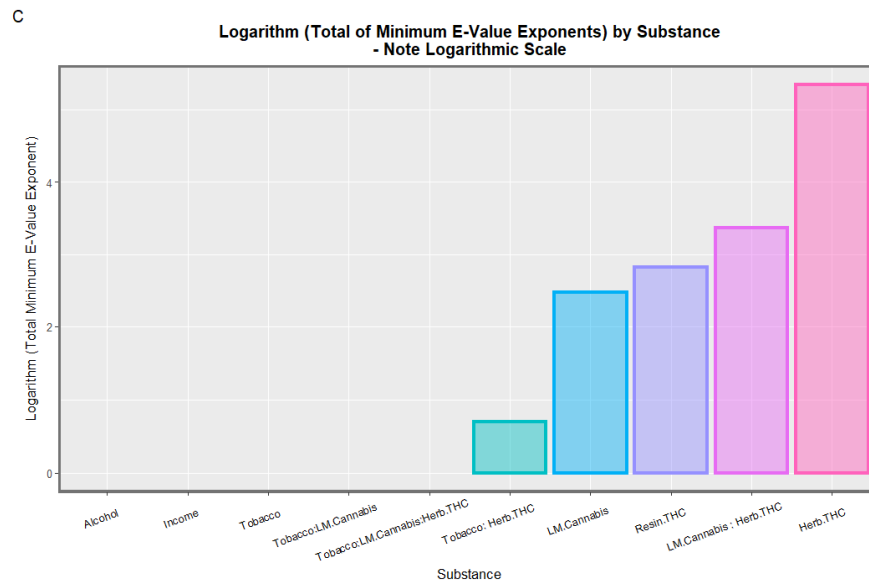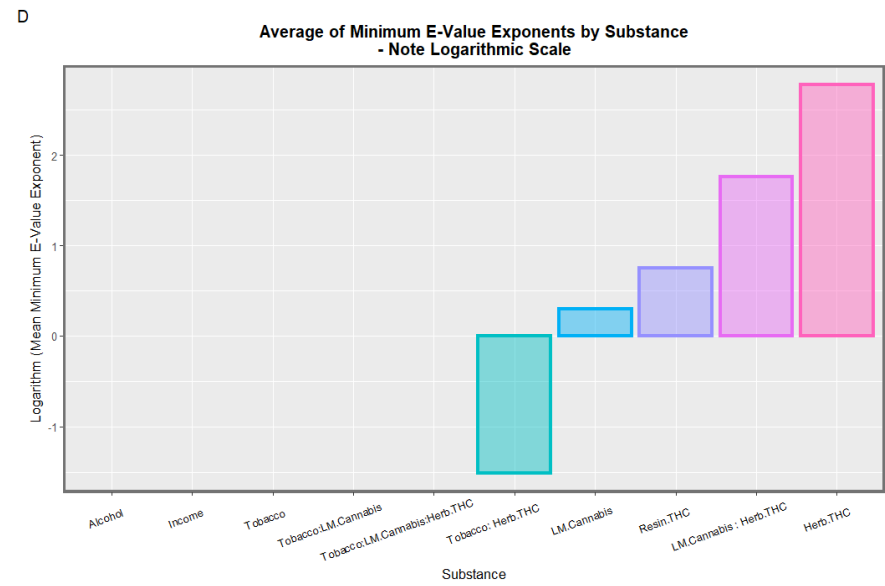

Supplementary Figure S26.: Graphical summary of interactive panel model at six years of lag.
